# Supplementary material for: Ensifer aridi LMR001T Symbiosis and Tolerance to Stress Do Not Require the Alternative Sigma Factor RpoE2
Source: MDPI journal article supplement (doi:10.3390/agronomy11091787), 2021-09-07
Supplement: s1 [file s1]

Archive with 2 entries (2 files):
- agronomy-1327444-supplementary.pdf
- Table-S1.xlsx
