# Supplementary material for: Ensifer aridi LMR001T Symbiosis and Tolerance to Stress Do Not Require the Alternative Sigma Factor RpoE2
Source: MDPI journal article supplement (doi:10.3390/agronomy11091787), 2021-09-07
Supplement: s1 [file s1 › Table-S1.xlsx]

## Sheet: SUPP Table S1
	RAST annotation Ensifer aridi LMR001										Raw Data upon mapping						Normalized Data										COG and KEGG annotation
Predicted Encoding Gene nb	Feature ID	Feature ID	Type	Contig	Start	Stop	Length (bp)	Function	Subsystems		Predicted Encoding Gene	Consensus length	Control Total read count	Salt Total read count	PEG8000 Total read count		Control	Salt Normalized (LOESS) read count	PEG8000 Normalized (LOESS) read count	Base Mean (Control Salt-LOESS)	Mean coverage Control & Salt LOESS	Log2 (Salt-LOESS/Control)	Base Mean (Control PEG8000-LOESS)	Mean coverage Control & PEG8000 LOESS	Log2 (PEG8000-LOESS/Control)		COG Classe(s)	KO Assignment KAAS
PEG1	fig|6666666.88372.peg.1	peg.1	CDS	LMR001-001	1013	1129	117	hypothetical protein	- none -		PEG1	117	69	100	144		69	72.1373	45.2111	70.5807	60.3253	0.0636484	57.1175	48.8184	-0.610422
PEG2	fig|6666666.88372.peg.2	peg.2	CDS	LMR001-001	1441	2787	1347	Acetylornithine deacetylase (EC 3.5.1.16)	Arginine Biosynthesis -- gjo, Arginine Biosynthesis extended		PEG2	1347	1614	2765	2855		1614	2403.88	1696.23	2009.12	149.155	0.574405	1655.29	122.887	0.0713672		E	K01438
PEG3	fig|6666666.88372.peg.3	peg.3	CDS	LMR001-001	3183	4415	1233	hypothetical protein	- none -		PEG3	1208	186	370	1165		186	314.531	463.842	250.37	20.726	0.756279	325.025	26.9061	1.31671
PEG4	fig|6666666.88372.peg.4	peg.4	CDS	LMR001-001	4546	4412	135	hypothetical protein	- none -		PEG4	130	6	21	64		6	15.1649	16.0611	10.5814	8.13955	1.33821	11.0295	8.48424	1.42104
PEG5	fig|6666666.88372.peg.5	peg.5	CDS	LMR001-001	4790	5911	1122	Mobile element protein	- none -		PEG5	1122	511	388	1190		511	334.161	479.58	422.333	37.6411	-0.611383	495.043	44.1214	-0.0901535		L
PEG6	fig|6666666.88372.peg.6	peg.6	CDS	LMR001-001	6665	6381	285	hypothetical protein	- none -		PEG6	284	73	148	188		73	110.176	64.2687	91.5611	32.2398	0.594919	68.6072	24.1575	-0.182708		L
PEG7	fig|6666666.88372.peg.7	peg.7	CDS	LMR001-001	6826	6710	117	hypothetical protein	- none -		PEG7	89	3	5	36		3	4.64315	7.96874	3.82116	4.29344	0.630545	5.48395	6.16174	1.40979
PEG8	fig|6666666.88372.peg.8	peg.8	CDS	LMR001-001	6914	7261	348	Mobile element protein	- none -		PEG8	346	42	78	303		42	56.4013	111.15	49.1886	14.2164	0.426166	76.563	22.128	1.40488		L
PEG9	fig|6666666.88372.peg.9	peg.9	CDS	LMR001-001	7362	7553	192	hypothetical protein	- none -		PEG9	192	21	46	125		21	32.4652	37.4735	26.7273	13.9205	0.629231	29.2314	15.2247	0.836209
PEG10	fig|6666666.88372.peg.10	peg.10	CDS	LMR001-001	10808	9159	1650	Dipeptide transport ATP-binding protein DppD (TC 3.A.1.5.2)	ABC transporter dipeptide (TC 3.A.1.5.2)		PEG10	1649	1756	3490	3125		1756	3079.76	1935.92	2418.84	146.685	0.808945	1846.92	112.002	0.139144		R	K02032
PEG11	fig|6666666.88372.peg.11	peg.11	CDS	LMR001-001	11677	10805	873	Dipeptide transport system permease protein DppC (TC 3.A.1.5.2)	ABC transporter dipeptide (TC 3.A.1.5.2)		PEG11	873	645	1372	1223		645	1202.1	499.146	923.875	105.828	0.896718	572.4	65.5671	-0.371299		EP	K02034
PEG12	fig|6666666.88372.peg.12	peg.12	CDS	LMR001-001	12591	11743	849	Oligopeptide transport system permease protein OppB (TC 3.A.1.5.1)	ABC transporter oligopeptide (TC 3.A.1.5.1)		PEG12	845	605	1342	1258		605	1182.04	524.653	893.689	105.762	0.965455	564.997	66.8636	-0.206384		EP	K02033
PEG13	fig|6666666.88372.peg.13	peg.13	CDS	LMR001-001	14127	12793	1335	Dipeptide-binding ABC transporter, periplasmic substrate-binding component (TC 3.A.1.5.2)	ABC transporter dipeptide (TC 3.A.1.5.2), Bacterial Chemotaxis		PEG13	1335	3318	5380	4583		3318	4588.12	3100.56	3953.53	296.145	0.46718	3209.75	240.431	-0.0981936		E	K02035
PEG14	fig|6666666.88372.peg.14	peg.14	CDS	LMR001-001	15756	14395	1362	Capsule biosynthesis protein capA	- none -		PEG14	1361	1854	2749	2603		1854	2386.91	1493.5	2120.22	155.784	0.36487	1673.51	122.962	-0.311582		M	K07282
PEG15	fig|6666666.88372.peg.15	peg.15	CDS	LMR001-001	17336	15900	1437	Catalyzes the cleavage of p-aminobenzoyl-glutamate to p-aminobenzoate and glutamate, subunit B	- none -		PEG15	1435	1783	2753	3109		1783	2392.51	1923.09	2087.44	145.466	0.424718	1852.73	129.11	0.10962		R	K12941
PEG16	fig|6666666.88372.peg.16	peg.16	CDS	LMR001-001	18814	18954	141	Mobile element protein	- none -		PEG16	141	35	101	86		35	72.8426	23.4155	53.9185	38.2401	1.05765	29.205	20.7128	-0.579664
PEG17	fig|6666666.88372.peg.17	peg.17	CDS	LMR001-001	19397	19245	153	hypothetical protein	- none -		PEG17	153	120	283	216		120	226.709	75.8399	173.329	113.287	0.918407	97.8949	63.9836	-0.661403
PEG18	fig|6666666.88372.peg.18	peg.18	CDS	LMR001-001	21129	19981	1149	Probable dipeptidase	- none -		PEG18	1149	3919	9548	4987		3919	8079.3	3420.76	5998.36	522.05	1.04433	3669.09	319.329	-0.195588		E	K01271
PEG19	fig|6666666.88372.peg.19	peg.19	CDS	LMR001-001	22084	21239	846	Spermidine Putrescine ABC transporter permease component potC (TC_3.A.1.11.1)	Polyamine Metabolism		PEG19	846	601	1273	1401		601	1134.37	619.883	867.771	102.573	0.916036	610.528	72.1664	0.0442129		E	K02053
PEG20	fig|6666666.88372.peg.20	peg.20	CDS	LMR001-001	23319	22081	1239	Spermidine Putrescine ABC transporter permease component PotB (TC 3.A.1.11.1)	Polyamine Metabolism		PEG20	1237	1100	2374	2337		1100	2069.63	1321.94	1584.32	128.078	0.913177	1210.47	97.8555	0.266456		E	K02054
PEG21	fig|6666666.88372.peg.21	peg.21	CDS	LMR001-001	24409	23384	1026	ABC transporter, periplasmic spermidine putrescine-binding protein PotD (TC 3.A.1.11.1)	Polyamine Metabolism		PEG21	1026	2394	6300	3087		2394	5435.34	1904.18	3914.33	381.513	1.18336	2148.75	209.43	-0.329842		E	K02055
PEG22	fig|6666666.88372.peg.22	peg.22	CDS	LMR001-001	25287	24568	720	Putrescine transport ATP-binding protein PotA (TC 3.A.1.11.1)	Polyamine Metabolism		PEG22	720	1501	3800	2286		1501	3313.69	1282.18	2406.69	334.262	1.14378	1390.93	193.185	-0.226061		E
PEG23	fig|6666666.88372.peg.23	peg.23	CDS	LMR001-001	25300	25446	147	hypothetical protein	- none -		PEG23	147	345	779	507		345	652.603	190.474	498.874	339.37	0.919009	267.809	182.183	-0.857601
PEG24	fig|6666666.88372.peg.24	peg.24	CDS	LMR001-001	29609	26646	2964	Sarcosine oxidase alpha subunit (EC 1.5.3.1)	Choline and Betaine Uptake and Betaine Biosynthesis, Sarcosine oxidase subunits		PEG24	2959	2185	2852	4131		2185	2485.36	2712.12	2334.05	78.8796	0.187323	2447.43	82.7113	0.313289		ER	K00302
PEG25	fig|6666666.88372.peg.25	peg.25	CDS	LMR001-001	29872	29606	267	Sarcosine oxidase delta subunit (EC 1.5.3.1)	Choline and Betaine Uptake and Betaine Biosynthesis, Sarcosine oxidase subunits		PEG25	263	163	184	308		163	141.884	113.327	152.407	57.9493	-0.199539	138.128	52.5203	-0.523758		E	K00304
PEG26	fig|6666666.88372.peg.26	peg.26	CDS	LMR001-001	31183	29882	1302	Sarcosine oxidase beta subunit (EC 1.5.3.1)	Choline and Betaine Uptake and Betaine Biosynthesis, Sarcosine oxidase subunits		PEG26	1299	628	930	1378		628	796.041	604.61	712.05	54.8152	0.341944	616.334	47.4468	-0.0548947		E	K00303
PEG27	fig|6666666.88372.peg.27	peg.27	CDS	LMR001-001	33748	32312	1437	Aspartyl-tRNA(Asn) amidotransferase subunit A (EC 6.3.5.6) @ Glutamyl-tRNA(Gln) amidotransferase subunit A (EC 6.3.5.7)	tRNA aminoacylation, Asp and Asn, tRNA aminoacylation, Glu and Gln		PEG27	1416	561	877	1389		561	736.324	613.361	648.686	45.8112	0.392217	587.204	41.4692	0.128612		J	K01506
PEG28	fig|6666666.88372.peg.28	peg.28	CDS	LMR001-001	34818	33817	1002	Oligopeptide transport ATP-binding protein OppF (TC 3.A.1.5.1)	ABC transporter oligopeptide (TC 3.A.1.5.1)		PEG28	1002	307	477	988		307	401.997	381.468	354.45	35.3742	0.389407	344.185	34.3498	0.313783		EP
PEG29	fig|6666666.88372.peg.29	peg.29	CDS	LMR001-001	35548	34811	738	ABC transporter, ATP-binding component	- none -		PEG29	737	298	450	764		298	381.541	284.153	339.696	46.0918	0.357243	291.002	39.4847	-0.0679253		EP	K02031
PEG30	fig|6666666.88372.peg.30	peg.30	CDS	LMR001-001	36603	35815	789	Dipeptide transport system permease protein DppC (TC 3.A.1.5.2)	ABC transporter dipeptide (TC 3.A.1.5.2)		PEG30	788	390	520	1058		390	434.601	409.217	412.272	52.3187	0.156433	399.58	50.7081	0.0696067		EP	K02034
PEG31	fig|6666666.88372.peg.31	peg.31	CDS	LMR001-001	37745	36747	999	Oligopeptide transport system permease protein OppB (TC 3.A.1.5.1)	ABC transporter oligopeptide (TC 3.A.1.5.1)		PEG31	998	414	569	1094		414	469.869	426.116	441.935	44.282	0.18263	420.058	42.09	0.0416173		EP	K02033
PEG32	fig|6666666.88372.peg.32	peg.32	CDS	LMR001-001	39409	37745	1665	Oligopeptide ABC transporter, periplasmic oligopeptide-binding protein OppA (TC 3.A.1.5.1)	ABC transporter oligopeptide (TC 3.A.1.5.1)		PEG32	1665	821	1117	1925		821	1017.12	1025.58	918.734	55.1792	0.310172	922.965	55.4333	0.322123		E	K02035
PEG33	fig|6666666.88372.peg.33	peg.33	CDS	LMR001-001	39683	40048	366	Transcriptional regulator, AsnC family	- none -		PEG33	366	547	751	1135		547	627.211	447.965	587.114	160.414	0.197369	497.49	135.926	-0.288197		K
PEG34	fig|6666666.88372.peg.34	peg.34	CDS	LMR001-001	40418	41758	1341	Acetylornithine deacetylase (EC 3.5.1.16)	Arginine Biosynthesis -- gjo, Arginine Biosynthesis extended		PEG34	1341	2203	3018	3381		2203	2669.04	2129.91	2435.98	181.654	0.276899	2166.42	161.552	-0.0486303		E	K01438
PEG35	fig|6666666.88372.peg.35	peg.35	CDS	LMR001-001	42003	42887	885	Formyltetrahydrofolate deformylase (EC 3.5.1.10)	5-FCL-like protein, One-carbon metabolism by tetrahydropterines		PEG35	865	932	1275	1449		932	1136.2	651.836	1033.65	119.497	0.287191	791.472	91.4996	-0.51444		F	K01433
PEG36	fig|6666666.88372.peg.36	peg.36	CDS	LMR001-001	42891	43796	906	Methylenetetrahydrofolate dehydrogenase (NADP+) (EC 1.5.1.5) / Methenyltetrahydrofolate cyclohydrolase (EC 3.5.4.9)	5-FCL-like protein, One-carbon metabolism by tetrahydropterines, One-carbon metabolism by tetrahydropterines, Serine-glyoxylate cycle, Serine-glyoxylate cycle		PEG36	906	574	756	1176		574	632.011	469.984	603.064	66.5633	0.138605	522.05	57.6215	-0.28873		H	K01491
PEG37	fig|6666666.88372.peg.37	peg.37	CDS	LMR001-001	44043	44867	825	Acetyl-coenzyme A synthetase (EC 6.2.1.1)	Pyruvate metabolism II: acetyl-CoA, acetogenesis from pyruvate		PEG37	823	66	170	529		66	128.725	198.951	97.3974	11.8344	0.962245	132.51	16.1009	1.59036		I
PEG38	fig|6666666.88372.peg.38	peg.38	CDS	LMR001-001	44839	45150	312	D-amino acid dehydrogenase small subunit (EC 1.4.99.1)	GABA and putrescine metabolism from cluters, Pyruvate Alanine Serine Interconversions, Respiratory dehydrogenases 1		PEG38	307	33	76	215		33	54.9244	75.4355	43.9807	14.326	0.733367	54.2362	17.6665	1.19116		E	K00285
PEG39	fig|6666666.88372.peg.39	peg.39	CDS	LMR001-001	45186	45566	381	Bona fide RidA/YjgF/TdcF/RutC subgroup	- none -		PEG39	379	73	141	484		73	104.717	181.27	88.8315	23.4384	0.521602	127.108	33.5378	1.31325		J	K09022
PEG40	fig|6666666.88372.peg.40	peg.40	CDS	LMR001-001	45684	45848	165	hypothetical protein	- none -			0	0	4	74		0
PEG41	fig|6666666.88372.peg.41	peg.41	CDS	LMR001-001	45838	46749	912	Succinate-semialdehyde dehydrogenase [NAD(P)+] (EC 1.2.1.16)	- none -		PEG41	820	34	79	837		34	57.2153	308.633	45.5889	5.55962	0.752458	171.298	20.89	3.18388		C
PEG42	fig|6666666.88372.peg.42	peg.42	CDS	LMR001-001	47102	46728	375	NAD-specific glutamate dehydrogenase (EC 1.4.1.2); NADP-specific glutamate dehydrogenase (EC 1.4.1.4)	Arginine and Ornithine Degradation, Glutamate dehydrogenases, Glutamate dehydrogenases, Glutamine, Glutamate, Aspartate and Asparagine Biosynthesis, Glutamine, Glutamate, Aspartate and Asparagine Biosynthesis, Proline Synthesis		PEG42	365	11	7	265		11	6.00168	96.0838	8.49587	2.32764	-0.872761	53.5369	14.6677	3.12809		E
PEG43	fig|6666666.88372.peg.43	peg.43	CDS	LMR001-001	47869	47099	771	NAD-specific glutamate dehydrogenase (EC 1.4.1.2); NADP-specific glutamate dehydrogenase (EC 1.4.1.4)	Arginine and Ornithine Degradation, Glutamate dehydrogenases, Glutamate dehydrogenases, Glutamine, Glutamate, Aspartate and Asparagine Biosynthesis, Glutamine, Glutamate, Aspartate and Asparagine Biosynthesis, Proline Synthesis		PEG43	767	213	585	1206		213	482.773	488.11	347.794	45.3447	1.18175	350.462	45.6925	1.19761		E	K00261
PEG44	fig|6666666.88372.peg.44	peg.44	CDS	LMR001-001	48788	48291	498	Acetyl-CoA acetyltransferase (EC 2.3.1.9)	Acetyl-CoA fermentation to Butyrate, Butanol Biosynthesis, Butyrate metabolism cluster, Isoprenoid Biosynthesis, Polyhydroxybutyrate metabolism, Serine-glyoxylate cycle		PEG44	486	49	64	546		49	45.5166	205.83	47.2472	9.72165	-0.105738	127.404	26.2148	2.07125		S
PEG45	fig|6666666.88372.peg.45	peg.45	CDS	LMR001-001	50338	48833	1506	Aldehyde dehydrogenase (EC 1.2.1.3)	Glycerolipid and Glycerophospholipid Metabolism in Bacteria, Methylglyoxal Metabolism, Methylglyoxal Metabolism, Pyruvate metabolism II: acetyl-CoA, acetogenesis from pyruvate		PEG45	1465	119	216	1317		119	171.585	564.624	145.355	9.92182	0.526458	341.874	23.3361	2.24482		C
PEG46	fig|6666666.88372.peg.46	peg.46	CDS	LMR001-001	51852	50398	1455	Gamma-aminobutyrate:alpha-ketoglutarate aminotransferase (EC 2.6.1.19)	Putrescine utilization pathways		PEG46	1455	191	340	1152		191	282.658	456.579	236.822	16.2764	0.565598	323.782	22.2531	1.2574		H	K15785
PEG47	fig|6666666.88372.peg.47	peg.47	CDS	LMR001-001	51936	52457	522	Transcriptional regulator, AsnC family	- none -		PEG47	514	1127	2073	2151		1127	1805.65	1171.5	1466.42	285.296	0.679774	1149.35	223.609	0.0556158		K	K03719
PEG48	fig|6666666.88372.peg.48	peg.48	CDS	LMR001-001	52835	52704	132	hypothetical protein	- none -		PEG48	132	22	41	110		22	28.9759	31.735	25.4772	19.3009	0.398754	26.8568	20.3461	0.529978
PEG49	fig|6666666.88372.peg.49	peg.49	CDS	LMR001-001	52919	53083	165	hypothetical protein	- none -		PEG49	165	30	27	66		30	19.1817	16.733	24.5867	14.901	-0.64483	23.3623	14.159	-0.841868
PEG50	fig|6666666.88372.peg.50	peg.50	CDS	LMR001-001	53250	53122	129	Mobile element protein	- none -		PEG50	91	1	11	24		1	8.65199	4.89627	4.82599	5.30329	3.11303	2.94814	3.23971	2.29168
PEG51	fig|6666666.88372.peg.51	peg.51	CDS	LMR001-001	53388	53269	120	hypothetical protein	- none -		PEG51	111	4	12	46		4	9.30728	10.7131	6.65337	5.99402	1.21856	7.35626	6.62726	1.4215
PEG52	fig|6666666.88372.peg.52	peg.52	CDS	LMR001-001	53632	53745	114	hypothetical protein	- none -		PEG52	110	19	50	52		19	35.2754	12.4215	27.1431	24.6755	0.891843	15.7162	14.2874	-0.613975
PEG53	fig|6666666.88372.peg.53	peg.53	CDS	LMR001-001	53994	54188	195	Mobile element protein	- none -		PEG53	184	27	73	87		27	52.5079	23.8272	39.7427	21.5993	0.960784	25.4023	13.8056	-0.17914
PEG54	fig|6666666.88372.peg.54	peg.54	CDS	LMR001-001	54476	54201	276	hypothetical protein	- none -		PEG54	271	64	159	176		64	119.065	59.2291	91.5191	33.7709	0.8962	61.6013	22.7311	-0.111169
PEG55	fig|6666666.88372.peg.55	peg.55	CDS	LMR001-001	54650	54495	156	hypothetical protein	- none -		PEG55	156	17	39	55		17	27.5644	13.2884	22.2734	14.2778	0.698761	15.1354	9.70218	-0.353881
PEG56	fig|6666666.88372.peg.56	peg.56	CDS	LMR001-001	54821	54702	120	hypothetical protein	- none -		PEG56	119	27	60	97		27	42.5173	27.2436	34.7474	29.1995	0.656301	27.1105	22.7819	0.0141661
PEG57	fig|6666666.88372.peg.57	peg.57	CDS	LMR001-001	55700	58030	2331	Penicillin acylase (Penicillin amidase) (EC 3.5.1.11)	- none -		PEG57	2328	1004	2047	2850		1004	1776.22	1690.59	1390.42	59.7258	0.822164	1347.6	57.8867	0.750883		R	K01434
PEG58	fig|6666666.88372.peg.58	peg.58	CDS	LMR001-001	58397	58086	312	NAD(P) transhydrogenase alpha subunit (EC 1.6.1.2)	Phosphate metabolism		PEG58	311	47	93	188		47	66.8649	64.2687	56.9271	18.3045	0.508912	55.6291	17.8872	0.45178		C
PEG59	fig|6666666.88372.peg.59	peg.59	CDS	LMR001-001	58519	59718	1200	Mobile element protein	- none -		PEG59	1200	192	342	1092		192	285.107	424.851	238.487	19.8739	0.571396	308.359	25.6966	1.14685		L
PEG60	fig|6666666.88372.peg.60	peg.60	CDS	LMR001-001	60345	60611	267	Mobile element protein	- none -		PEG60	246	12	41	107		12	28.9759	30.6776	20.4854	8.32742	1.27242	21.3363	8.6733	1.35476		L
PEG61	fig|6666666.88372.peg.61	peg.61	CDS	LMR001-001	61067	60954	114	hypothetical protein	- none -		PEG61	108	7	13	52		7	9.95755	12.4215	8.47798	7.84998	0.508761	9.70997	8.99072	0.827741
PEG62	fig|6666666.88372.peg.62	peg.62	CDS	LMR001-002	939	115	825	putative Sir2-like transcriptional silencer protein	- none -		PEG62	825	502	975	1454		502	850.914	656.121	676.628	82.0155	0.760341	579.232	70.2099	0.38529
PEG63	fig|6666666.88372.peg.63	peg.63	CDS	LMR001-002	1139	1480	342	Transcriptional regulator, ArsR family	CBSS-1085.1.peg.1363		PEG63	342	356	490	624		356	411.834	237.852	383.733	112.203	0.211681	296.742	86.7666	-0.580317		K
PEG64	fig|6666666.88372.peg.64	peg.64	CDS	LMR001-002	1514	1978	465	Probable glutathione S-transferase-related transmembrane protein (EC 2.5.1.18)	- none -		PEG64	465	1028	1279	1523		1028	1138.05	704.162	1083.03	232.91	0.146695	866.089	186.256	-0.545883		S
PEG65	fig|6666666.88372.peg.65	peg.65	CDS	LMR001-002	1975	2424	450	FIG01074712: hypothetical protein	- none -		PEG65	450	1022	1229	1684		1022	1109.28	840.526	1065.11	236.691	0.119728	930.733	206.829	-0.280533		S
PEG66	fig|6666666.88372.peg.66	peg.66	CDS	LMR001-002	4900	2444	2457	Xylulose-5-phosphate phosphoketolase (EC 4.1.2.9) @ Fructose-6-phosphate phosphoketolase (EC 4.1.2.22)	Fermentations: Lactate, Fermentations: Lactate, Pentose phosphate pathway, Pentose phosphate pathway		PEG66	2454	1554	3432	5180		1554	3037.43	3565.31	2294.91	93.517	0.968362	2558.85	104.273	1.19954		G	K01621
PEG67	fig|6666666.88372.peg.67	peg.67	CDS	LMR001-002	6811	5087	1725	Dihydroxy-acid dehydratase (EC 4.2.1.9)	Branched-Chain Amino Acid Biosynthesis		PEG67	1722	1132	1373	3544		1132	1204.31	2242.28	1168.36	67.8488	0.0888267	1687.34	97.9872	0.985581		EG	K01687
PEG68	fig|6666666.88372.peg.68	peg.68	CDS	LMR001-002	6811	7611	801	Predicted D-glucarate or D-galactorate regulator, GntR family	D-galactarate, D-glucarate and D-glycerate catabolism, D-galactarate, D-glucarate and D-glycerate catabolism - gjo		PEG68	801	2644	3291	4162		2644	2924.26	2736.04	2783.33	347.482	0.146217	2689.22	335.733	0.0502339		K
PEG69	fig|6666666.88372.peg.69	peg.69	CDS	LMR001-002	8705	7749	957	hypothetical protein	- none -		PEG69	957	1103	1246	2090		1103	1118.92	1126.5	1111.5	116.144	0.0192678	1115.29	116.54	0.0290078		EM
PEG70	fig|6666666.88372.peg.70	peg.70	CDS	LMR001-002	8866	9753	888	Gluconolactonase (EC 3.1.1.17)	Entner-Doudoroff Pathway		PEG70	888	633	835	1466		633	697.944	662.748	665.178	74.9074	0.142247	647.58	72.9257	0.0675954		G
PEG71	fig|6666666.88372.peg.71	peg.71	CDS	LMR001-002	10164	9838	327	hypothetical protein	- none -		PEG71	326	185	230	608		185	184.532	231.458	184.73	56.6655	-0.00308161	208.193	63.8627	0.323797
PEG72	fig|6666666.88372.peg.72	peg.72	CDS	LMR001-002	11329	10250	1080	Various polyols ABC transporter, ATP-binding component	Uptake of selenate and selenite		PEG72	1080	1986	1208	3246		1986	1096.36	2030.7	1541.23	142.706	-0.857209	2008.4	185.963	0.032044		G	K10111
PEG73	fig|6666666.88372.peg.73	peg.73	CDS	LMR001-002	12429	11356	1074	GLUCOSE-FRUCTOSE OXIDOREDUCTASE (EC 1.1.99.28)	CBSS-479435.4.peg.2736		PEG73	1074	1655	1173	2539		1655	1069.98	1452.42	1362.87	126.897	-0.629922	1554.09	144.702	-0.189044		R
PEG74	fig|6666666.88372.peg.74	peg.74	CDS	LMR001-002	13447	12431	1017	PUTATIVE OXIDOREDUCTASE PROTEIN	- none -		PEG74	1015	1224	724	2162		1224	602.13	1179.23	913.373	89.9875	-1.02418	1201.92	118.416	-0.054484		R
PEG75	fig|6666666.88372.peg.75	peg.75	CDS	LMR001-002	14341	13478	864	Nucleoside ABC transporter, permease protein 1	- none -		PEG75	864	822	522	1719		822	436.239	872.396	629.241	72.8288	-0.914446	847.319	98.0694	0.0854187		G	K02026
PEG76	fig|6666666.88372.peg.76	peg.76	CDS	LMR001-002	15305	14349	957	Inositol transport system permease protein	Inositol catabolism		PEG76	957	1933	1308	2560		1933	1157.91	1464.32	1544.94	161.436	-0.738545	1698.14	177.445	-0.39984		G	K02025
PEG77	fig|6666666.88372.peg.77	peg.77	CDS	LMR001-002	16596	15310	1287	Nucleoside ABC transporter, permease protein 1	- none -		PEG77	1287	4330	2871	4375		4330	2505.76	2922.61	3415.45	265.381	-0.787497	3623.87	281.575	-0.56549		G	K02027
PEG78	fig|6666666.88372.peg.78	peg.78	CDS	LMR001-002	16810	17481	672	Transcriptional regulator, TetR family	- none -		PEG78	672	781	864	1842		781	724.04	971.341	752.834	112.029	-0.110412	876.485	130.429	0.313496		K
PEG79	fig|6666666.88372.peg.79	peg.79	CDS	LMR001-002	17606	18754	1149	GLUCOSE-FRUCTOSE OXIDOREDUCTASE (EC 1.1.99.28)	CBSS-479435.4.peg.2736		PEG79	1149	3856	2117	4080		3856	1849.65	2673.23	2852.22	248.235	-1.0594	3264.01	284.074	-0.528065		R
PEG80	fig|6666666.88372.peg.80	peg.80	CDS	LMR001-002	18758	19921	1164	Conserved hypothetical protein potentially related to ribose or hydroxymethylpyrimidine metabolism	CBSS-479435.4.peg.2736		PEG80	1164	2528	1106	3108		2528	1006.21	1916.8	1767.75	151.869	-1.32981	2223.05	190.983	-0.40004
PEG81	fig|6666666.88372.peg.81	peg.81	CDS	LMR001-002	19930	21348	1419	FIG01074109: hypothetical protein	- none -		PEG81	1419	2064	1084	3156		2064	980.346	1960.4	1522.86	107.319	-1.07504	2012.89	141.853	-0.0752605		MR
PEG82	fig|6666666.88372.peg.82	peg.82	CDS	LMR001-002	21369	22193	825	Sugar phosphate isomerases/epimerase	- none -		PEG82	825	1223	640	2090		1223	527.331	1126.5	874.565	106.008	-1.21223	1174.15	142.321	-0.117157		G
PEG83	fig|6666666.88372.peg.83	peg.83	CDS	LMR001-002	22354	23646	1293	FIG01074824: hypothetical protein	- none -		PEG83	1293	2959	2659	4643		2959	2310.66	3153.96	2634.34	203.738	-0.356323	3055.99	236.349	0.0925367		R
PEG84	fig|6666666.88372.peg.84	peg.84	CDS	LMR001-002	23784	26057	2274	Lead, cadmium, zinc and mercury transporting ATPase (EC 3.6.3.3) (EC 3.6.3.5); Copper-translocating P-type ATPase (EC 3.6.3.4)	Copper Transport System, Copper homeostasis		PEG84	2274	8513	2413	5017		8513	2107.73	3437.91	5309.56	233.49	-2.0137	5974.65	262.737	-1.30786		P	K01534
PEG85	fig|6666666.88372.peg.85	peg.85	CDS	LMR001-002	26338	26123	216	hypothetical protein	- none -		PEG85	216	674	588	598		674	485.039	227.524	579.784	268.418	-0.475777	451.026	208.808	-1.56786
PEG86	fig|6666666.88372.peg.86	peg.86	CDS	LMR001-002	26312	27847	1536	Predicted nucleoside ABC transporter, ATP-binding component	D-ribose utilization, Deoxyribose and Deoxynucleoside Catabolism		PEG86	1536	9108	13404	9909		9108	10885.4	7571.32	9992.24	650.537	0.258587	8335.23	542.658	-0.265184		R	K02056
PEG87	fig|6666666.88372.peg.87	peg.87	CDS	LMR001-002	27844	28977	1134	Predicted nucleoside ABC transporter, permease 1 component	D-ribose utilization, Deoxyribose and Deoxynucleoside Catabolism		PEG87	1134	3681	5274	4779		3681	4489.3	3259.74	4085.3	360.255	0.28628	3470.51	306.042	-0.175456		R	K02057
PEG88	fig|6666666.88372.peg.88	peg.88	CDS	LMR001-002	28981	29952	972	Predicted nucleoside ABC transporter, permease 2 component	D-ribose utilization, Deoxyribose and Deoxynucleoside Catabolism		PEG88	972	3143	4243	3741		3143	3643.08	2397.9	3391.79	348.95	0.214161	2769.2	284.897	-0.389229		R	K02057
PEG89	fig|6666666.88372.peg.89	peg.89	CDS	LMR001-002	29956	30351	396	Cytidine deaminase (EC 3.5.4.5)	pyrimidine conversions, tRNA modification Bacteria		PEG89	396	1346	1965	1659		1346	1692.84	819.405	1519.35	383.674	0.330915	1082.63	273.392	-0.71588		F	K01489
PEG90	fig|6666666.88372.peg.90	peg.90	CDS	LMR001-002	30348	31145	798	Purine nucleoside phosphorylase (EC 2.4.2.1)	Adenosyl nucleosidases, Deoxyribose and Deoxynucleoside Catabolism, Purine conversions, pyrimidine conversions		PEG90	798	2470	3218	3547		2470	2868.72	2248.23	2670.22	334.614	0.214888	2359.98	295.737	-0.136727		F	K03783
PEG91	fig|6666666.88372.peg.91	peg.91	CDS	LMR001-002	31147	32463	1317	Thymidine phosphorylase (EC 2.4.2.4)	Deoxyribose and Deoxynucleoside Catabolism, pyrimidine conversions		PEG91	1317	2646	2822	4283		2646	2459.01	2844.56	2553.76	193.907	-0.107097	2746.53	208.545	0.103032		F	K00758
PEG92	fig|6666666.88372.peg.92	peg.92	CDS	LMR001-002	32983	32456	528	FIG00984531: hypothetical protein	- none -		PEG92	528	562	699	1067		562	577.35	413.363	569.846	107.925	0.0379996	487.852	92.3962	-0.444037		R	K06985
PEG93	fig|6666666.88372.peg.93	peg.93	CDS	LMR001-002	33742	33113	630	Uracil phosphoribosyltransferase (EC 2.4.2.9)	De Novo Pyrimidine Synthesis, pyrimidine conversions		PEG93	630	4455	6184	7121		4455	5333.18	5142.97	4894.87	776.964	0.259065	4799.77	761.868	0.20667		F	K00761
PEG94	fig|6666666.88372.peg.94	peg.94	CDS	LMR001-002	34932	33958	975	Adenosine deaminase (EC 3.5.4.4)	Purine conversions		PEG94	975	2634	3132	4591		2634	2789.49	3109.57	2712.91	278.247	0.0814695	2872.95	294.662	0.238183		F	K01488
PEG95	fig|6666666.88372.peg.95	peg.95	CDS	LMR001-002	36149	34929	1221	Phosphopentomutase (EC 5.4.2.7)	Deoxyribose and Deoxynucleoside Catabolism		PEG95	1221	2245	3112	4325		2245	2766.82	2878.9	2505.35	205.188	0.302231	2561.39	209.778	0.359521		G	K01839
PEG96	fig|6666666.88372.peg.96	peg.96	CDS	LMR001-002	36868	36281	588	Superfamily I DNA and RNA helicases	- none -		PEG96	586	326	307	948		326	248.063	360.956	286.95	48.9675	-0.393443	343.396	58.6001	0.147675		U
PEG97	fig|6666666.88372.peg.97	peg.97	CDS	LMR001-002	37487	36876	612	Similar to TadZ/CpaE, associated with Flp pilus assembly	Widespread colonization island		PEG97	611	664	595	1152		664	491.919	456.579	577.831	94.5713	-0.432205	560.161	91.6794	-0.539761		U
PEG98	fig|6666666.88372.peg.98	peg.98	CDS	LMR001-002	38014	37595	420	Similar to secretin RcpA/CpaC, associated with Flp pilus assembly	Widespread colonization island		PEG98	420	7145	9231	9015		7145	7798.58	6783.39	7471.77	1778.99	0.126284	6964.18	1658.14	-0.0749204		U
PEG99	fig|6666666.88372.peg.99	peg.99	CDS	LMR001-002	38266	38484	219	Flp pilus assembly protein, pilin Flp	Widespread colonization island		PEG99	219	3237	2762	3392		3237	2398.16	2135.38	2817.05	1286.32	-0.432255	2685.66	1226.33	-0.599689		U	K02651
PEG100	fig|6666666.88372.peg.100	peg.100	CDS	LMR001-002	38578	39090	513	Type IV prepilin peptidase TadV/CpaA	Widespread colonization island		PEG100	513	637	724	1377		637	602.13	604.61	619.463	120.753	-0.0807545	620.703	120.995	-0.0748262		OU	K02278
PEG101	fig|6666666.88372.peg.101	peg.101	CDS	LMR001-002	39222	40031	810	Flp pilus assembly protein RcpC/CpaB	Widespread colonization island		PEG101	810	6008	3579	6917		6008	3147.06	4973.27	4579.4	565.358	-0.933779	5492.5	678.087	-0.273587		U	K02279
PEG102	fig|6666666.88372.peg.102	peg.102	CDS	LMR001-002	40050	41576	1527	Type II/IV secretion system secretin RcpA/CpaC, associated with Flp pilus assembly	Widespread colonization island		PEG102	1527	3122	1067	4647		3122	960.473	3153.96	2039.68	133.574	-1.69921	3136.43	205.398	0.0161324		U	K02280
PEG103	fig|6666666.88372.peg.103	peg.103	CDS	LMR001-002	41633	42313	681	Flp pilus assembly protein CpaD	Widespread colonization island		PEG103	681	1489	372	1828		1489	317.382	962.306	903.371	132.654	-2.2304	1225.83	180.005	-0.630126		N	K02281
PEG104	fig|6666666.88372.peg.104	peg.104	CDS	LMR001-002	42339	43625	1287	Type II/IV secretion system ATPase TadZ/CpaE, associated with Flp pilus assembly	Widespread colonization island		PEG104	1287	3154	852	4173		3154	711.322	2744.08	1933.16	150.207	-2.14907	2949.54	229.179	-0.201322		U	K02282
PEG105	fig|6666666.88372.peg.105	peg.105	CDS	LMR001-002	43673	45133	1461	Type II/IV secretion system ATP hydrolase TadA/VirB11/CpaF, TadA subfamily	Widespread colonization island		PEG105	1447	1653	510	2778		1653	427.874	1631.7	1039.92	71.8672	-1.94892	1641.83	113.465	-0.0178024		U	K02283
PEG106	fig|6666666.88372.peg.106	peg.106	CDS	LMR001-002	45200	46210	1011	Flp pilus assembly protein TadB	Widespread colonization island		PEG106	1009	843	282	2419		843	225.651	1375.82	534.493	52.9725	-1.90201	1109.58	109.968	0.706114		U	K12510
PEG107	fig|6666666.88372.peg.107	peg.107	CDS	LMR001-002	46207	47208	1002	Type II/IV secretion system protein TadC, associated with Flp pilus assembly	Widespread colonization island		PEG107	1002	983	396	2627		983	341.926	1510.96	662.968	66.1645	-1.52499	1247.48	124.499	0.618716		NU	K12511
PEG108	fig|6666666.88372.peg.108	peg.108	CDS	LMR001-002	48285	47527	759	Flp pilus assembly protein TadD, contains TPR repeat	Widespread colonization island		PEG108	759	2072	1133	3094		2072	1033.11	1910.49	1551.63	204.431	-1.00273	1990.32	262.229	-0.115784		U
PEG109	fig|6666666.88372.peg.109	peg.109	CDS	LMR001-002	48578	49969	1392	Peptidase B (EC 3.4.11.23)	Aminopeptidases (EC 3.4.11.-)		PEG109	1392	12103	5690	11802		12103	4878.68	9158.79	8492.33	610.081	-1.31116	10632.4	763.821	-0.402491		E	K01255
PEG110	fig|6666666.88372.peg.110	peg.110	CDS	LMR001-002	50062	50406	345	Transcriptional regulator, MarR family	- none -		PEG110	345	882	572	1205		882	471.929	488.11	676.489	196.084	-0.900653	684.579	198.429	-0.852017		K
PEG111	fig|6666666.88372.peg.111	peg.111	CDS	LMR001-002	50415	51269	855	NLP/P60 family lipoprotein	- none -		PEG111	855	3524	2617	4984		3524	2275.8	3420.76	2899.75	339.152	-0.630723	3472.23	406.109	-0.0427794		M
PEG112	fig|6666666.88372.peg.112	peg.112	CDS	LMR001-002	52291	51350	942	D-3-phosphoglycerate dehydrogenase (EC 1.1.1.95)	Glycine and Serine Utilization, Pyridoxin (Vitamin B6) Biosynthesis, Serine Biosynthesis		PEG112	942	2634	1846	3679		2634	1590.19	2350.07	2113.26	224.338	-0.72933	2493.2	264.671	-0.165825		HE	K12972
PEG113	fig|6666666.88372.peg.113	peg.113	CDS	LMR001-002	53959	52319	1641	Oligopeptide transport system permease protein OppB (TC 3.A.1.5.1)	ABC transporter oligopeptide (TC 3.A.1.5.1)		PEG113	1641	4620	5056	7606		4620	4303.88	5527.01	4463.85	272.02	-0.103444	5075.41	309.288	0.257418		R	K13896
PEG114	fig|6666666.88372.peg.114	peg.114	CDS	LMR001-002	55089	53956	1134	Oligopeptide transport system permease protein OppC (TC 3.A.1.5.1)	ABC transporter oligopeptide (TC 3.A.1.5.1)		PEG114	1134	3533	3841	5650		3533	3340.38	3959.41	3436.11	303.008	-0.0804034	3745.62	330.302	0.164868		R	K13895
PEG115	fig|6666666.88372.peg.115	peg.115	CDS	LMR001-002	56168	55089	1080	Oligopeptide transport system permease protein OppB (TC 3.A.1.5.1)	ABC transporter oligopeptide (TC 3.A.1.5.1)		PEG115	1080	4635	4635	6910		4635	3951.91	4960.18	4293.19	397.518	-0.229854	4797.32	444.197	0.0979884		R	K13894
PEG116	fig|6666666.88372.peg.116	peg.116	CDS	LMR001-002	58196	56346	1851	ABC transporter, periplasmic substrate-binding protein	- none -		PEG116	1851	6381	13267	11204		6381	10804.8	8670.9	8593.69	464.273	0.759442	7526.77	406.633	0.44203		E	K13893
PEG117	fig|6666666.88372.peg.117	peg.117	CDS	LMR001-002	58399	59460	1062	Murein endopeptidase	- none -		PEG117	1062	6423	6561	8412		6423	5657.01	6228.96	6041.94	568.921	-0.184078	6327.92	595.849	-0.0451274		M	K07261
PEG118	fig|6666666.88372.peg.118	peg.118	CDS	LMR001-002	59589	59969	381	Methylglyoxal synthase (EC 4.2.3.3)	Methylglyoxal Metabolism		PEG118	379	416	1269	756		416	1130.78	282.371	773.347	204.049	1.44298	349.141	92.1215	-0.558683		G	K01734
PEG119	fig|6666666.88372.peg.119	peg.119	CDS	LMR001-002	60107	61126	1020	Glucokinase (EC 2.7.1.2)	Entner-Doudoroff Pathway, Glycolysis and Gluconeogenesis		PEG119	1020	3015	4602	4594		3015	3925.34	3109.57	3469.17	340.115	0.381615	3061.29	300.126	0.045511		G	K00845
PEG120	fig|6666666.88372.peg.120	peg.120	CDS	LMR001-002	61230	63032	1803	Lipid A export ATP-binding/permease protein MsbA	- none -		PEG120	1799	2699	7281	5841		2699	6211.28	4106.64	4454.51	247.61	1.20314	3402.19	189.116	0.606206		V	K06147
PEG121	fig|6666666.88372.peg.121	peg.121	CDS	LMR001-002	63050	63868	819	4-hydroxy-tetrahydrodipicolinate reductase (EC 1.17.1.8)	Lysine Biosynthesis DAP Pathway, Lysine Biosynthesis DAP Pathway, GJO scratch		PEG121	819	2287	3859	4003		2287	3353.57	2606.77	2819.58	344.271	0.553123	2446.18	298.679	0.18969		E	K00215
PEG122	fig|6666666.88372.peg.122	peg.122	CDS	LMR001-002	63897	64532	636	Phosphoglycerate mutase (EC 5.4.2.1)	Entner-Doudoroff Pathway, Glycolysis and Gluconeogenesis, Phosphoglycerate mutase protein family		PEG122	636	5089	7007	6415		5089	6009.92	4554.27	5551.61	872.895	0.238742	4823.79	758.457	-0.161384		G	K01834
PEG123	fig|6666666.88372.peg.123	peg.123	CDS	LMR001-002	65598	64726	873	ADA regulatory protein / Methylated-DNA--protein-cysteine methyltransferase (EC 2.1.1.63)	CBSS-393124.3.peg.2657, CBSS-393124.3.peg.2657, DNA repair, bacterial, DNA repair, bacterial		PEG123	873	2400	2071	3507		2400	1800.72	2218.91	2099.78	240.524	-0.413755	2308.87	264.476	-0.112478		LK	K10778
PEG124	fig|6666666.88372.peg.124	peg.124	CDS	LMR001-002	66173	65676	498	FIG00440777: hypothetical protein	- none -		PEG124	498	1070	1632	2461		1070	1418.25	1400.28	1243.65	249.73	0.407778	1234.67	247.925	0.389377		S
PEG125	fig|6666666.88372.peg.125	peg.125	CDS	LMR001-002	66196	66972	777	Endonuclease III (EC 4.2.99.18)	DNA Repair Base Excision		PEG125	769	1382	2431	2568		1382	2121.9	1472.46	1752.73	227.923	0.616962	1428.01	185.698	0.0898396		L	K10773
PEG126	fig|6666666.88372.peg.126	peg.126	CDS	LMR001-002	67685	67092	594	Transcriptional regulator, TetR family	- none -		PEG126	594	367	682	864		367	562.846	319.732	465.064	78.2937	0.615852	343.507	57.8295	-0.200025
PEG127	fig|6666666.88372.peg.127	peg.127	CDS	LMR001-002	67753	68178	426	Glyoxalase/Bleomycin resistance protein/dioxygenase domain	- none -		PEG127	426	482	1467	1147		482	1271.26	455.114	876.605	205.776	1.39931	468.531	109.984	-0.082649		S
PEG128	fig|6666666.88372.peg.128	peg.128	CDS	LMR001-002	68344	69336	993	Fructokinase (EC 2.7.1.4)	Fructose utilization, Mannitol Utilization		PEG128	993	4741	6030	6445		4741	5195.45	4578.25	4968.93	500.396	0.131624	4660.33	469.319	-0.0508276		G
PEG129	fig|6666666.88372.peg.129	peg.129	CDS	LMR001-002	69665	69907	243	COG0645: Predicted kinase	- none -		PEG129	243	823	862	969		823	722.147	371.731	772.195	317.776	-0.187272	596.987	245.674	-1.14531
PEG130	fig|6666666.88372.peg.130	peg.130	CDS	LMR001-002	70609	69974	636	FIG00983381: hypothetical protein	- none -		PEG130	636	4716	3491	5653		4716	3079.76	3959.41	3900.2	613.238	-0.616162	4340.02	682.393	-0.253695		S
PEG131	fig|6666666.88372.peg.131	peg.131	CDS	LMR001-002	70761	71765	1005	Glyoxylate reductase (EC 1.1.1.79) / Glyoxylate reductase (EC 1.1.1.26) / Hydroxypyruvate reductase (EC 1.1.1.81)	Glycerate metabolism, Glycolate, glyoxylate interconversions, Glycolate, glyoxylate interconversions, Glycolate, glyoxylate interconversions, Photorespiration (oxidative C2 cycle)		PEG131	1005	4943	4066	6534		4943	3513.75	4651.73	4228.43	420.739	-0.492406	4797.42	477.355	-0.08765		CHR	K00015
PEG132	fig|6666666.88372.peg.132	peg.132	CDS	LMR001-002	72019	72354	336	Transcriptional regulator, ArsR family	CBSS-1085.1.peg.1363		PEG132	336	313	306	493		313	247.344	184.883	280.336	83.4334	-0.34116	249.106	74.1386	-0.761064		K
PEG133	fig|6666666.88372.peg.133	peg.133	CDS	LMR001-002	72384	72827	444	hypothetical protein	- none -		PEG133	444	800	596	1168		800	491.919	465.356	645.876	145.468	-0.701282	632.595	142.476	-0.781367		S
PEG134	fig|6666666.88372.peg.134	peg.134	CDS	LMR001-002	73363	72896	468	FIG01201438: hypothetical protein	- none -		PEG134	468	816	809	1387		816	676.298	611.176	746.44	159.496	-0.27194	713.879	152.538	-0.41801		E
PEG135	fig|6666666.88372.peg.135	peg.135	CDS	LMR001-002	74135	73371	765	Molybdopterin biosynthesis protein MoeB	Molybdenum cofactor biosynthesis		PEG135	765	2150	2013	3208		2150	1742.91	2002.33	1945.37	254.297	-0.301378	2075.08	271.252	-0.101201		H
PEG136	fig|6666666.88372.peg.136	peg.136	CDS	LMR001-002	75314	74190	1125	DNA recombination and repair protein RecF	Cell Division Subsystem including YidCD, DNA repair, bacterial RecFOR pathway, DNA replication cluster 1		PEG136	1123	524	966	2254		524	840.324	1256.8	681.962	60.7268	0.682479	890.199	79.2697	1.26321		L	K03629
PEG137	fig|6666666.88372.peg.137	peg.137	CDS	LMR001-002	75521	76156	636	FIG01075391: hypothetical protein	- none -		PEG137	636	635	560	1530		635	462.826	709.684	549.078	86.3331	-0.457039	672.507	105.74	0.159668		S
PEG138	fig|6666666.88372.peg.138	peg.138	CDS	LMR001-002	76161	77045	885	FIG01073969: hypothetical protein	- none -		PEG138	885	416	621	1407		416	512.535	624.2	464.223	52.4546	0.301377	520.055	58.7633	0.585735		S
PEG139	fig|6666666.88372.peg.139	peg.139	CDS	LMR001-002	78365	77229	1137	Chaperone protein DnaJ	GroEL GroES, Heat shock dnaK gene cluster extended, Protein chaperones		PEG139	1137	14594	17648	18566		14594	13826.4	14671	14207.2	1249.54	-0.0773755	14629.6	1286.68	0.00816684		O	K03686
PEG140	fig|6666666.88372.peg.140	peg.140	CDS	LMR001-002	80541	78616	1926	Chaperone protein DnaK	GroEL GroES, Heat shock dnaK gene cluster extended, Protein chaperones		PEG140	1926	128548	109564	116520		128548	62795.3	104866	95662	4966.87	-1.03336	116697	6059.05	-0.293546		O	K04043
PEG141	fig|6666666.88372.peg.141	peg.141	CDS	LMR001-002	80587	80784	198	hypothetical protein	- none -		PEG141	198	99	133	457		99	98.4608	170.71	98.772	49.8849	-0.00909064	134.896	68.1295	0.784833
PEG142	fig|6666666.88372.peg.142	peg.142	CDS	LMR001-002	83186	80853	2334	Multimodular transpeptidase-transglycosylase (EC 2.4.1.129) (EC 3.4.-.-)	Peptidoglycan Biosynthesis		PEG142	2334	4373	5861	8534		4373	5042.82	6337.32	4709.02	201.757	0.204874	5356.27	229.489	0.534517		M
PEG143	fig|6666666.88372.peg.143	peg.143	CDS	LMR001-002	83667	84605	939	Arginine/ornithine antiporter ArcD	Arginine Deiminase Pathway, Arginine and Ornithine Degradation, Polyamine Metabolism		PEG143	937	215	366	1308		215	310.035	558.652	262.409	28.0052	0.529549	386.718	41.2719	1.37907		GER
PEG144	fig|6666666.88372.peg.144	peg.144	CDS	LMR001-002	84734	85204	471	FIG01075910: hypothetical protein	- none -		PEG144	471	324	569	1217		324	469.869	495.452	397.105	84.3109	0.534755	409.896	87.0267	0.611239
PEG145	fig|6666666.88372.peg.145	peg.145	CDS	LMR001-002	86314	85292	1023	membrane protein, putative	- none -		PEG145	1023	902	1477	2147		902	1279.53	1167.74	1090.55	106.603	0.505096	1034.65	101.139	0.373204		S	K07027
PEG146	fig|6666666.88372.peg.146	peg.146	CDS	LMR001-002	88013	86625	1389	Acetylornithine deacetylase/Succinyl-diaminopimelate desuccinylase and related deacylases	- none -		PEG146	1389	14645	11734	16513		14645	9739.97	12954.9	12197.7	878.166	-0.589451	13805.2	993.894	-0.177943		E
PEG147	fig|6666666.88372.peg.147	peg.147	CDS	LMR001-002	88501	88115	387	Transcriptional regulator, MarR family	- none -		PEG147	387	531	1004	1018		531	886.769	393.991	708.826	183.159	0.74016	462.438	119.493	-0.430236		K
PEG148	fig|6666666.88372.peg.148	peg.148	CDS	LMR001-002	89043	92057	3015	DNA polymerase I (EC 2.7.7.7)	DNA Repair Base Excision		PEG148	3004	15082	24744	20408		15082	18375.7	16219.1	16720.9	556.621	0.286496	15642.6	520.726	0.106394		L	K02335
PEG149	fig|6666666.88372.peg.149	peg.149	CDS	LMR001-002	92316	93218	903	Formyltetrahydrofolate deformylase (EC 3.5.1.10)	5-FCL-like protein, One-carbon metabolism by tetrahydropterines		PEG149	898	451	847	1700		451	707.886	854.739	579.351	64.5157	0.650975	652.778	72.6924	0.922944		F	K01433
PEG150	fig|6666666.88372.peg.150	peg.150	CDS	LMR001-002	93890	93255	636	Transcription repressor of multidrug efflux pump acrAB operon, TetR (AcrR) family	Multidrug Resistance Efflux Pumps		PEG150	636	2679	2884	3823		2679	2519.63	2461.26	2599.4	408.71	-0.088574	2570.22	404.122	-0.122386		K	K03577
PEG151	fig|6666666.88372.peg.151	peg.151	CDS	LMR001-002	97080	93943	3138	RND efflux system, inner membrane transporter CmeB	Multidrug Resistance Efflux Pumps		PEG151	3138	37649	48732	45463		37649	32406.4	38632.7	35038.4	1116.58	-0.21715	38151.5	1215.79	0.0363911		V	K18138
PEG152	fig|6666666.88372.peg.152	peg.152	CDS	LMR001-002	98311	97091	1221	RND efflux system, membrane fusion protein CmeA	Multidrug Resistance Efflux Pumps		PEG152	1221	14666	20019	19200		14666	15375	15180.5	15015.3	1229.75	0.0691508	14918	1221.78	0.0507794		M	K03585
PEG153	fig|6666666.88372.peg.153	peg.153	CDS	LMR001-002	98387	98527	141	hypothetical protein	- none -		PEG153	138	17	18	100		17	13.1963	28.267	15.0894	10.9343	-0.363907	22.6247	16.3947	0.735074
PEG154	fig|6666666.88372.peg.154	peg.154	CDS	LMR001-002	98831	99004	174	hypothetical protein	- none -		PEG154	174	414	352	618		414	295.966	235.456	354.983	204.013	-0.484196	324.728	186.625	-0.814172
PEG155	fig|6666666.88372.peg.155	peg.155	CDS	LMR001-002	100085	99075	1011	N-Acetyl-D-glucosamine ABC transport system ATP-binding protein	Chitin and N-acetylglucosamine utilization		PEG155	1011	9065	887	9693		9065	747.062	7371.55	4902.19	484.886	-3.59979	8214.44	812.506	-0.297117		G	K10111
PEG156	fig|6666666.88372.peg.156	peg.156	CDS	LMR001-002	101165	100101	1065	hypothetical oxidoreductase related to N-acetylglucosamine utilization	Chitin and N-acetylglucosamine utilization		PEG156	1065	8121	822	8541		8121	686.983	6355.5	4407.64	413.863	-3.56461	7241.9	679.991	-0.354948		R
PEG157	fig|6666666.88372.peg.157	peg.157	CDS	LMR001-002	102001	101162	840	N-Acetyl-D-glucosamine ABC transport system, permease protein 2	Chitin and N-acetylglucosamine utilization		PEG157	840	3537	368	4951		3537	312.69	3395.31	1926.33	229.325	-3.50093	3467.64	412.815	-0.0601947		G	K10119
PEG158	fig|6666666.88372.peg.158	peg.158	CDS	LMR001-002	102961	102014	948	N-Acetyl-D-glucosamine ABC transport system, permease protein 1	Chitin and N-acetylglucosamine utilization		PEG158	948	6303	761	7163		6303	635.018	5169.5	3472.3	366.276	-3.31267	5739.54	605.436	-0.287517		G	K10118
PEG159	fig|6666666.88372.peg.159	peg.159	CDS	LMR001-002	104465	103206	1260	N-Acetyl-D-glucosamine ABC transport system, sugar-binding protein	Chitin and N-acetylglucosamine utilization		PEG159	1260	52533	5263	50827		52533	4478.67	43530.3	28479.7	2260.29	-3.55064	48005.5	3809.96	-0.269768		G	K10117
PEG160	fig|6666666.88372.peg.160	peg.160	CDS	LMR001-002	105416	104517	900	N-acetylmuramic acid 6-phosphate etherase	- none -		PEG160	900	5639	850	8720		5639	709.595	6521.58	3172.99	352.554	-2.9897	6078.98	675.442	0.210454		R	K07106
PEG161	fig|6666666.88372.peg.161	peg.161	CDS	LMR001-002	105616	106500	885	N-acetylglucosamine kinase of eukaryotic type (EC 2.7.1.59)	Chitin and N-acetylglucosamine utilization		PEG161	885	4020	574	6527		4020	474.024	4651.73	2245.97	253.781	-3.08341	4334.82	489.81	0.211324		G	K18676
PEG162	fig|6666666.88372.peg.162	peg.162	CDS	LMR001-002	106497	107261	765	Predicted transcriptional regulator of N-Acetylglucosamine utilization, GntR family	Chitin and N-acetylglucosamine utilization		PEG162	765	2603	390	4340		2603	335.936	2887.6	1468.05	191.902	-2.95234	2743.88	358.677	0.15127		K	K03710
PEG163	fig|6666666.88372.peg.163	peg.163	CDS	LMR001-002	107286	108314	1029	Glucosamine-6-phosphate deaminase [isomerizing], alternative (EC 3.5.99.6)	Chitin and N-acetylglucosamine utilization		PEG163	1029	10504	1984	13100		10504	1714.21	10175	6104.82	593.277	-2.61414	10335.2	1004.39	-0.0447293		M	K00820
PEG164	fig|6666666.88372.peg.164	peg.164	CDS	LMR001-002	108311	109471	1161	N-acetylglucosamine-6-phosphate deacetylase (EC 3.5.1.25)	Chitin and N-acetylglucosamine utilization, Sialic Acid Metabolism		PEG164	1161	10584	1792	13054		10584	1546.67	10151	6069.61	522.791	-2.77581	10371.8	893.349	-0.0614238		G	K01443
PEG165	fig|6666666.88372.peg.165	peg.165	CDS	LMR001-002	110205	109468	738	Cytoplasmic copper homeostasis protein cutC	- none -		PEG165	738	2605	1601	3652		2605	1388.12	2330.06	1997.14	270.615	-0.908788	2468.11	334.432	-0.161555		P	K06201
PEG166	fig|6666666.88372.peg.166	peg.166	CDS	LMR001-002	111113	110202	912	N-acetylmannosamine kinase (EC 2.7.1.60)	Sialic Acid Metabolism		PEG166	912	1612	1757	2752		1612	1520.2	1610.74	1565.42	171.647	-0.0833778	1610.7	176.611	8.89404e-05		KG	K00884
PEG167	fig|6666666.88372.peg.167	peg.167	CDS	LMR001-002	112471	111110	1362	Asp-tRNAAsn/Glu-tRNAGln amidotransferase A subunit and related amidases	- none -		PEG167	1362	3606	3479	5380		3606	3067.65	3737.92	3336.72	244.986	-0.233182	3671.86	269.593	0.0519235		J	K02433
PEG168	fig|6666666.88372.peg.168	peg.168	CDS	LMR001-002	112815	113552	738	Probable transmembrane protein	- none -		PEG168	738	2935	1802	4403		2935	1556.62	2949.05	2247.13	304.49	-0.916247	2943.35	398.828	0.00558772		E	K06203
PEG169	fig|6666666.88372.peg.169	peg.169	CDS	LMR001-002	113624	113833	210	Protein SlyX	- none -		PEG169	210	493	437	833		493	372.601	307.107	432.887	206.137	-0.404464	400.14	190.543	-0.683354		S	K03745
PEG170	fig|6666666.88372.peg.170	peg.170	CDS	LMR001-002	114888	113896	993	Predicted nucleoside ABC transporter, substrate-binding component	D-ribose utilization, Deoxyribose and Deoxynucleoside Catabolism		PEG170	993	85424	65705	72900		85424	41326.1	63989.6	63416.4	6386.35	-1.04898	74748.2	7527.51	-0.418199		R	K07335
PEG171	fig|6666666.88372.peg.171	peg.171	CDS	LMR001-002	114901	115038	138	hypothetical protein	- none -		PEG171	137	34	22	69		34	15.8124	17.6956	24.8875	18.166	-1.10289	25.829	18.8533	-0.940555
PEG172	fig|6666666.88372.peg.172	peg.172	CDS	LMR001-002	115089	115280	192	hypothetical protein	- none -		PEG172	192	246	226	380		246	180.723	140.1	213.38	111.135	-0.445094	193.068	100.556	-0.812419
PEG173	fig|6666666.88372.peg.173	peg.173	CDS	LMR001-002	115885	115232	654	Peptide methionine sulfoxide reductase MsrA (EC 1.8.4.11)	Peptide methionine sulfoxide reductase, Putative sugar ABC transporter (ytf cluster)		PEG173	654	2971	2113	3579		2971	1844.81	2272.53	2408.24	368.232	-0.6878	2622.1	400.933	-0.38697		O	K07304
PEG174	fig|6666666.88372.peg.174	peg.174	CDS	LMR001-002	116252	115935	318	conserved hypothetical signal peptide protein	- none -		PEG174	318	2313	1675	2262		2313	1453.62	1261.18	1882.84	592.089	-0.66953	1786.62	561.831	-0.874408
PEG175	fig|6666666.88372.peg.175	peg.175	CDS	LMR001-002	117695	116844	852	D-tagatose 3-epimerase (EC 5.3.1.-)	- none -		PEG175	852	1817	1442	2506		1817	1252.52	1429.64	1534.02	180.049	-0.535544	1622.58	190.444	-0.344726		G
PEG176	fig|6666666.88372.peg.176	peg.176	CDS	LMR001-002	118002	118889	888	D-Tagatose 3-epimerase	- none -		PEG176	888	2415	1961	3211		2415	1688.69	2007.91	2052.08	231.09	-0.516392	2211.68	249.063	-0.266607		G
PEG177	fig|6666666.88372.peg.177	peg.177	CDS	LMR001-002	118945	120114	1170	L-alanine-DL-glutamate epimerase and related enzymes of enolase superfamily	- none -		PEG177	1170	953	863	2239		953	722.147	1243.57	837.472	71.5788	-0.399875	1098.18	93.8616	0.384243		MR
PEG178	fig|6666666.88372.peg.178	peg.178	CDS	LMR001-002	120117	120809	693	Transcriptional regulator, GntR family	- none -		PEG178	691	598	663	1352		598	546.653	587.221	572.533	82.8556	-0.130512	592.816	85.7911	-0.0272345		K
PEG179	fig|6666666.88372.peg.179	peg.179	CDS	LMR001-002	120835	121809	975	D-3-phosphoglycerate dehydrogenase (EC 1.1.1.95)	Glycine and Serine Utilization, Pyridoxin (Vitamin B6) Biosynthesis, Serine Biosynthesis		PEG179	975	199	266	947		199	213.876	359.802	206.472	21.1766	0.10352	279.435	28.66	0.853946		HE	K00058
PEG180	fig|6666666.88372.peg.180	peg.180	CDS	LMR001-002	123111	122035	1077	Nucleoside ABC transporter, permease protein 1	- none -		PEG180	1077	1226	1062	2183		1226	955.076	1195.51	1089.85	101.193	-0.358642	1210.06	112.355	-0.034708		G	K10112
PEG181	fig|6666666.88372.peg.181	peg.181	CDS	LMR001-002	124220	123111	1110	Nucleoside ABC transporter, permease protein 1	- none -		PEG181	1110	1402	1283	2560		1402	1139.92	1464.32	1271.37	114.538	-0.299392	1433.57	129.15	0.0619075		G	K10112
PEG182	fig|6666666.88372.peg.182	peg.182	CDS	LMR001-002	124420	124217	204	FIG00984339: hypothetical protein	- none -		PEG182	204	381	366	495		381	310.035	185.8	345.55	169.387	-0.297611	283.433	138.938	-1.03629
PEG183	fig|6666666.88372.peg.183	peg.183	CDS	LMR001-002	125376	124417	960	Dihydroxyacetone ABC transport system, permease protein	- none -		PEG183	958	1267	1464	2081		1267	1271.26	1121.1	1269.46	132.511	0.004103	1194.38	124.674	-0.177237		G	K02026
PEG184	fig|6666666.88372.peg.184	peg.184	CDS	LMR001-002	126283	125378	906	ABC transporter, permease protein	- none -		PEG184	905	1262	1018	1722		1262	903.777	875.929	1082.8	119.647	-0.481476	1068.88	118.108	-0.526629		G	K02025
PEG185	fig|6666666.88372.peg.185	peg.185	CDS	LMR001-002	127743	126436	1308	ABC transporter, periplasmic substrate-binding protein	- none -		PEG185	1308	8748	7576	8192		8748	6429.6	6023.85	7589.72	580.254	-0.444528	7386.84	564.743	-0.538571		G	K02027
PEG186	fig|6666666.88372.peg.186	peg.186	CDS	LMR001-002	128671	128105	567	Transcriptional regulator, TetR family	- none -		PEG186	564	421	1513	1127		421	1311.55	443.743	866.139	153.571	1.64032	432.235	76.6374	0.0768418
PEG187	fig|6666666.88372.peg.187	peg.187	CDS	LMR001-002	128801	130048	1248	Transcriptional regulator	- none -		PEG187	1248	576	1637	1687		576	1421.53	844.063	998.484	80.0067	1.3047	709.751	56.8711	0.552685		S
PEG188	fig|6666666.88372.peg.188	peg.188	CDS	LMR001-002	130060	130902	843	TIM-barrel signal transduction protein	- none -		PEG188	843	638	774	1151		638	647.94	456.579	643.102	76.2873	0.0217079	547.421	64.9373	-0.483288		R
PEG189	fig|6666666.88372.peg.189	peg.189	CDS	LMR001-002	130933	131346	414	protein	- none -		PEG189	414	447	395	727		447	340.945	274.959	393.814	95.1242	-0.389714	360.821	87.1549	-0.700039		GR
PEG190	fig|6666666.88372.peg.190	peg.190	CDS	LMR001-002	131379	132617	1239	Macromolecule metabolism; Macromolecule degradation	- none -		PEG190	1239	2514	1788	2935		2514	1543.36	1766.3	2027.62	163.65	-0.702697	2139.1	172.647	-0.508037		E
PEG191	fig|6666666.88372.peg.191	peg.191	CDS	LMR001-002	133228	132635	594	ThiJ/PfpI family protein	- none -		PEG191	594	8964	2270	6039		8964	1984.11	4265.02	5479.2	922.424	-2.17731	6619.65	1114.42	-1.07324		R	K05520
PEG192	fig|6666666.88372.peg.192	peg.192	CDS	LMR001-002	133954	133256	699	Transcriptional regulator, GntR family	- none -		PEG192	699	2589	1645	3115		2589	1428.04	1923.09	2008.13	287.286	-0.857915	2255.65	322.697	-0.428532		K
PEG193	fig|6666666.88372.peg.193	peg.193	CDS	LMR001-002	134194	135159	966	Transcriptional regulator, LysR family	CBSS-349102.4.peg.3442		PEG193	966	1248	898	1761		1248	758.809	911.123	1003.1	103.84	-0.717097	1079.25	111.724	-0.453187		K
PEG194	fig|6666666.88372.peg.194	peg.194	CDS	LMR001-002	135536	136378	843	Glutamate Aspartate periplasmic binding protein precursor GltI (TC 3.A.1.3.4)	- none -		PEG194	843	606	667	1270		606	549.111	532.773	577.226	68.4729	-0.140649	569.057	67.5038	-0.184226		ET
PEG195	fig|6666666.88372.peg.195	peg.195	CDS	LMR001-002	136438	137625	1188	Glutamate Aspartate transport system permease protein GltJ (TC 3.A.1.3.4)	- none -		PEG195	1186	370	600	1384		370	495.348	608.988	432.588	36.4745	0.421586	489.408	41.2655	0.71956		E	K09970
PEG196	fig|6666666.88372.peg.196	peg.196	CDS	LMR001-002	137626	138759	1134	Glutamate Aspartate transport system permease protein GltK (TC 3.A.1.3.4)	- none -		PEG196	1134	382	391	1299		382	336.958	552.456	359.451	31.6976	-0.180792	467.2	41.1993	0.532496		E	K09971
PEG197	fig|6666666.88372.peg.197	peg.197	CDS	LMR001-002	138966	140177	1212	Aspartate aminotransferase (EC 2.6.1.1)	CBSS-216591.1.peg.168, Glutamine, Glutamate, Aspartate and Asparagine Biosynthesis, Threonine and Homoserine Biosynthesis		PEG197	1209	970	823	2076		970	686.983	1118.15	828.747	68.5481	-0.498468	1044.33	86.3798	0.204303		E	K14155
PEG198	fig|6666666.88372.peg.198	peg.198	CDS	LMR001-002	141258	140293	966	Sodium - Bile acid symporter	CBSS-349102.4.peg.3442		PEG198	966	1021	1297	1839		1021	1149.61	971.341	1085.27	112.347	0.171248	996.14	103.12	-0.0718473		R	K14347
PEG199	fig|6666666.88372.peg.199	peg.199	CDS	LMR001-002	142708	141275	1434	2-ketoglutaric semialdehyde dehydrogenase (EC 1.2.1.26)	- none -		PEG199	1433	1055	1722	2039		1055	1491.43	1095.04	1272.91	88.8281	0.50029	1074.72	74.9976	0.0545849		C	K00135
PEG200	fig|6666666.88372.peg.200	peg.200	CDS	LMR001-002	144325	142733	1593	Gamma-glutamyltranspeptidase (EC 2.3.2.2)	Glutathione: Biosynthesis and gamma-glutamyl cycle, Utilization of glutathione as a sulphur source		PEG200	1591	1076	1600	2256		1076	1388.12	1256.8	1232.29	77.454	0.366832	1166.63	73.3269	0.223451		E	K00681
PEG201	fig|6666666.88372.peg.201	peg.201	CDS	LMR001-002	145721	144339	1383	Adenosylmethionine-8-amino-7-oxononanoate aminotransferase (EC 2.6.1.62)	Biotin biosynthesis, Biotin biosynthesis Experimental		PEG201	1383	986	1455	2076		986	1262.77	1118.15	1124.52	81.3105	0.356521	1052.22	76.0822	0.18105		H	K16871
PEG202	fig|6666666.88372.peg.202	peg.202	CDS	LMR001-002	146788	145946	843	Lysine-arginine-ornithine-binding periplasmic protein precursor (TC 3.A.1.3.1)	Arginine and Ornithine Degradation		PEG202	843	920	1616	1610		920	1401.72	774.926	1161.08	137.732	0.606786	847.688	100.556	-0.24828		ET	K10018
PEG203	fig|6666666.88372.peg.203	peg.203	CDS	LMR001-002	147907	146840	1068	Agmatinase (EC 3.5.3.11)	Arginine and Ornithine Degradation, Polyamine Metabolism		PEG203	1067	340	638	1032		340	526.164	399.501	432.895	40.5712	0.631569	369.563	34.6357	0.234255		E	K01480
PEG204	fig|6666666.88372.peg.204	peg.204	CDS	LMR001-002	148096	148794	699	probable transcriptional regulator protein	- none -		PEG204	699	1490	1567	1978		1490	1358.54	1058.23	1423.95	203.712	-0.13264	1273.79	182.231	-0.493045		K
PEG205	fig|6666666.88372.peg.205	peg.205	CDS	LMR001-002	148824	149549	726	octopine ABC transporter, permease protein	- none -		PEG205	726	724	767	1402		724	641.553	622.044	682.994	94.0763	-0.175291	673.24	92.7328	-0.219841		E	K10020
PEG206	fig|6666666.88372.peg.206	peg.206	CDS	LMR001-002	149549	150253	705	FIG00985739: hypothetical protein	- none -		PEG206	705	727	872	1376		727	731.892	604.61	729.836	103.523	0.00812835	666.195	94.4957	-0.267498		E	K10019
PEG207	fig|6666666.88372.peg.207	peg.207	CDS	LMR001-002	150265	151068	804	Histidine ABC transporter, ATP-binding protein HisP (TC 3.A.1.3.1)	Arginine and Ornithine Degradation		PEG207	804	1238	1454	2024		1238	1262.77	1086.5	1250.78	155.57	0.0276498	1162.65	144.608	-0.189254		E	K10021
PEG208	fig|6666666.88372.peg.208	peg.208	CDS	LMR001-002	152064	151195	870	dessication-associated protein	- none -		PEG208	866	173	408	887		173	352.36	329.526	262.671	30.3315	1.02643	251.254	29.0131	0.929772
PEG209	fig|6666666.88372.peg.209	peg.209	CDS	LMR001-002	153732	152284	1449	Putative transport protein	- none -		PEG209	1447	339	359	1612		339	302.809	774.926	320.826	22.1718	-0.162215	556.885	38.4855	1.19344		G
PEG210	fig|6666666.88372.peg.210	peg.210	CDS	LMR001-002	153870	154808	939	Transcriptional regulator, LysR family	CBSS-349102.4.peg.3442		PEG210	936	305	544	1318		305	451.633	564.624	378.211	40.4072	0.567337	434.707	46.443	0.889477		K
PEG211	fig|6666666.88372.peg.211	peg.211	CDS	LMR001-002	155274	154819	456	hypothetical protein	- none -		PEG211	449	221	579	1072		221	478.304	415.486	349.552	77.8513	1.11518	318.143	70.856	0.912057		S
PEG212	fig|6666666.88372.peg.212	peg.212	CDS	LMR001-002	155610	155335	276	FIG01075197: hypothetical protein	- none -		PEG212	274	86	698	319		86	577.35	117.474	331.626	121.031	2.74869	101.687	37.1122	0.451583		R
PEG213	fig|6666666.88372.peg.213	peg.213	CDS	LMR001-002	155664	155870	207	hypothetical protein	- none -		PEG213	201	110	160	297		110	119.971	108.993	114.936	57.182	0.126488	109.447	54.4511	-0.0119661
PEG214	fig|6666666.88372.peg.214	peg.214	CDS	LMR001-002	155881	156825	945	Transporter	- none -		PEG214	945	1443	2044	2465		1443	1771.36	1403.88	1606.74	170.025	0.296675	1423	150.582	-0.0387679		R	K07088
PEG215	fig|6666666.88372.peg.215	peg.215	CDS	LMR001-002	157946	156849	1098	Branched-chain amino acid aminotransferase (EC 2.6.1.42)	Alanine biosynthesis, Branched-Chain Amino Acid Biosynthesis, Isoleucine degradation, Leucine Biosynthesis, Leucine Degradation and HMG-CoA Metabolism, Pyruvate Alanine Serine Interconversions, Valine degradation		PEG215	1098	8815	8595	10008		8815	7252.31	7652.24	8031.4	731.457	-0.280782	8231.36	749.669	-0.20334		EH	K00826
PEG216	fig|6666666.88372.peg.216	peg.216	CDS	LMR001-002	157971	158168	198	hypothetical protein	- none -		PEG216	195	141	134	280		141	99.1898	102.145	120.059	61.5689	-0.506704	121.537	62.3266	-0.46435
PEG217	fig|6666666.88372.peg.217	peg.217	CDS	LMR001-002	158866	158222	645	membrane c-type cytochrome cy	Terminal cytochrome C oxidases		PEG217	645	25976	31600	41499		25976	22577.5	34991.1	24289.6	3765.82	-0.203712	30496.3	4728.11	0.428387		C	K08738
PEG218	fig|6666666.88372.peg.218	peg.218	CDS	LMR001-002	159023	159775	753	3-deoxy-manno-octulosonate cytidylyltransferase (EC 2.7.7.38)	- none -		PEG218	753	1649	2463	3358		1649	2145.31	2113.66	1896.73	251.89	0.380325	1880.91	249.789	0.358888		M	K00979
PEG219	fig|6666666.88372.peg.219	peg.219	CDS	LMR001-002	159789	160643	855	Prephenate dehydratase (EC 4.2.1.51)	Chorismate Synthesis, Phenylalanine and Tyrosine Branches from Chorismate		PEG219	855	1544	2853	3176		1544	2485.36	1978.69	2015.31	235.709	0.685612	1761.97	206.079	0.356702		E	K04518
PEG220	fig|6666666.88372.peg.220	peg.220	CDS	LMR001-002	160997	161134	138	FIG00451146: hypothetical protein	- none -		PEG220	138	4984	13774	12254		4984	11138.7	9509.69	8063.75	5843.3	1.1588	7249.27	5253.09	0.930693
PEG221	fig|6666666.88372.peg.221	peg.221	CDS	LMR001-002	162277	161297	981	NADH pyrophosphatase (EC 3.6.1.22)	Nudix proteins (nucleoside triphosphate hydrolases)		PEG221	981	5881	5077	7015		5881	4323.43	5050.97	5099.16	519.792	-0.442385	5462.93	556.874	-0.218002		L	K03426
PEG222	fig|6666666.88372.peg.222	peg.222	CDS	LMR001-002	162684	162280	405	HIT1 PROTEIN	- none -		PEG222	405	854	790	1274		854	661.531	534.652	757.316	186.992	-0.366906	693.876	171.327	-0.674115		FGR
PEG223	fig|6666666.88372.peg.223	peg.223	CDS	LMR001-002	162934	164808	1875	DNA polymerase III subunits gamma and tau (EC 2.7.7.7)	DNA processing cluster		PEG223	1875	8636	14410	15571		8636	11575.6	12156.5	10102.7	538.811	0.423693	10393.2	554.302	0.494336		L	K02343
PEG224	fig|6666666.88372.peg.224	peg.224	CDS	LMR001-002	164871	165194	324	FIG000557: hypothetical protein co-occurring with RecR	DNA processing cluster		PEG224	324	3763	4844	4919		3763	4124.2	3370.14	3945.62	1217.78	0.130684	3568.59	1101.42	-0.160622		S	K09747
PEG225	fig|6666666.88372.peg.225	peg.225	CDS	LMR001-002	165316	165945	630	LysE family protein	- none -		PEG225	630	2715	2986	3949		2715	2630.48	2563	2673.46	424.358	-0.046392	2639.72	419.003	-0.0838826		E
PEG226	fig|6666666.88372.peg.226	peg.226	CDS	LMR001-002	165995	166600	606	Recombination protein RecR	DNA processing cluster, DNA repair, bacterial RecFOR pathway		PEG226	606	1480	2540	2616		1480	2211.15	1506.54	1845.13	304.477	0.580068	1492.83	246.341	0.0265129		L	K06187
PEG227	fig|6666666.88372.peg.227	peg.227	CDS	LMR001-002	166611	167909	1299	Membrane-bound lytic murein transglycosylase B precursor (EC 3.2.1.-)	Murein Hydrolases, Peptidoglycan Biosynthesis		PEG227	1295	2274	3370	4451		2274	2989.26	2984.5	2632.18	203.257	0.393861	2629.8	203.073	0.391563		M
PEG228	fig|6666666.88372.peg.228	peg.228	CDS	LMR001-002	168530	168012	519	FIG00985258: hypothetical protein	- none -		PEG228	517	190	416	936		190	358.212	354.058	274.16	53.029	0.913996	272.083	52.6273	0.897168
PEG229	fig|6666666.88372.peg.229	peg.229	CDS	LMR001-002	168669	168938	270	Transcriptional regulator, ArsR family	CBSS-1085.1.peg.1363		PEG229	269	47	87	466		47	62.8783	173.984	54.9338	20.4215	0.420226	110.487	41.0732	1.88855		K
PEG230	fig|6666666.88372.peg.230	peg.230	CDS	LMR001-002	168940	170172	1233	putative membrane protein	- none -		PEG230	1226	236	357	1873		236	301.074	994.609	268.561	21.9055	0.351038	615.328	50.1899	2.07505		G
PEG231	fig|6666666.88372.peg.231	peg.231	CDS	LMR001-002	172061	170433	1629	MFS permease	- none -		PEG231	1629	1608	1490	3556		1608	1290.88	2254.22	1448.91	88.9447	-0.315964	1930.58	118.513	0.488309		G
PEG232	fig|6666666.88372.peg.232	peg.232	CDS	LMR001-002	172321	172938	618	FIG000325: clustered with transcription termination protein NusA	NusA-TFII Cluster, Transcription factors bacterial		PEG232	618	6679	17338	9242		6679	13606.4	6989.11	10144.9	1641.57	1.02562	6836.27	1106.19	0.0645174		S	K09748
PEG233	fig|6666666.88372.peg.233	peg.233	CDS	LMR001-002	172984	174600	1617	Transcription termination protein NusA	NusA-TFII Cluster, Transcription factors bacterial		PEG233	1617	17283	34945	21490		17283	24517.5	17132.3	20907.8	1293	0.503193	17215.3	1064.64	-0.0138965		K	K02600
PEG234	fig|6666666.88372.peg.234	peg.234	CDS	LMR001-002	174606	175298	693	COG2740: Predicted nucleic-acid-binding protein implicated in transcription termination / ribosomal protein L7Ae family protein	NusA-TFII Cluster, NusA-TFII Cluster, Transcription factors bacterial, Transcription factors bacterial		PEG234	693	3667	8085	4771		3667	6838.6	3259.74	5251.49	757.791	0.900134	3462.06	499.575	-0.168812		K	K07742
PEG235	fig|6666666.88372.peg.235	peg.235	CDS	LMR001-002	175404	178070	2667	Translation initiation factor 2	CBSS-138119.3.peg.2719, Inteins, NusA-TFII Cluster, Translation initiation factors bacterial, Universal GTPases		PEG235	2667	29981	74210	42600		29981	45561.7	35953.9	37776.7	1416.45	0.603262	32972.8	1236.32	0.26159		JS	K02519
PEG236	fig|6666666.88372.peg.236	peg.236	CDS	LMR001-002	178310	178140	171	hypothetical protein	- none -		PEG236	176	129	463	237		129	391.132	84.6841	260.127	147.799	1.59892	106.903	60.7404	-0.608571
PEG237	fig|6666666.88372.peg.237	peg.237	CDS	LMR001-002	178342	178752	411	Ribosome-binding factor A	CBSS-138119.3.peg.2719, NusA-TFII Cluster, Translation initiation factors bacterial		PEG237	411	581	2108	1643		581	1839.95	805.458	1210.36	294.491	1.66364	693.111	168.64	0.471857		J	K02834
PEG238	fig|6666666.88372.peg.238	peg.238	CDS	LMR001-002	178761	179696	936	tRNA pseudouridine synthase B (EC 4.2.1.70)	CBSS-138119.3.peg.2719, RNA pseudouridine syntheses, Riboflavin, FMN and FAD metabolism in plants, tRNA modification Bacteria, tRNA processing		PEG238	936	970	5011	2634		970	4264.98	1519.9	2617.75	279.674	2.13572	1245.2	133.034	0.647157		J	K03177
PEG239	fig|6666666.88372.peg.239	peg.239	CDS	LMR001-002	179964	181682	1719	FIG01076584: hypothetical protein	- none -		PEG239	1717	832	1551	3574		832	1345.58	2266.39	1088.67	63.4054	0.693981	1549.07	90.2198	1.44615		T
PEG240	fig|6666666.88372.peg.240	peg.240	CDS	LMR001-002	181682	181840	159	hypothetical protein	- none -		PEG240	157	62	62	199		62	43.985	68.9428	52.9646	33.7354	-0.493955	65.4435	41.6837	0.154433
PEG241	fig|6666666.88372.peg.241	peg.241	CDS	LMR001-002	181837	182178	342	SSU ribosomal protein S15p (S13e)	Ribosome SSU bacterial		PEG241	342	26835	160475	50205		26835	85798.4	42993.4	56325.9	16469.6	1.67584	34923.4	10211.5	0.679007		J	K02956
PEG242	fig|6666666.88372.peg.242	peg.242	CDS	LMR001-002	182627	182244	384	hypothetical protein	- none -		PEG242	383	1804	6173	2911		1804	5320.51	1742.24	3561.77	929.965	1.56115	1772.63	462.827	-0.0494705
PEG243	fig|6666666.88372.peg.243	peg.243	CDS	LMR001-002	182601	184793	2193	Polyribonucleotide nucleotidyltransferase (EC 2.7.7.8)	Bacterial RNA-metabolizing Zn-dependent hydrolases		PEG243	2193	22871	109228	35333		22871	62558.2	29430.9	42707.1	1947.43	1.45263	26143.4	1192.13	0.364758		J	K00962
PEG244	fig|6666666.88372.peg.244	peg.244	CDS	LMR001-002	184922	185938	1017	Ribosomal RNA small subunit methyltransferase C (EC 2.1.1.52)	RNA methylation		PEG244	1017	1150	4362	3151		1150	3731.34	1954.24	2441.07	240.027	1.69706	1552.52	152.657	0.763971		J	K00564
PEG245	fig|6666666.88372.peg.245	peg.245	CDS	LMR001-002	186978	186172	807	Enoyl-[acyl-carrier-protein] reductase [NADH] (EC 1.3.1.9)	Fatty Acid Biosynthesis FASII		PEG245	807	4639	9402	7193		4639	7946.79	5195.86	6290.63	779.508	0.777969	4915.17	609.066	0.164959		I	K00208
PEG246	fig|6666666.88372.peg.246	peg.246	CDS	LMR001-002	188203	186983	1221	3-oxoacyl-[acyl-carrier-protein] synthase, KASI (EC 2.3.1.41)	Fatty Acid Biosynthesis FASII		PEG246	1221	12348	25023	17100		12348	18548.9	13439.6	15454.2	1265.7	0.585719	12899.5	1056.47	0.120871		IQ	K00647
PEG247	fig|6666666.88372.peg.247	peg.247	CDS	LMR001-002	188770	188255	516	3-hydroxydecanoyl-[acyl-carrier-protein] dehydratase (EC 4.2.1.59)	- none -		PEG247	516	4977	10933	6367		4977	9190.93	4518.96	7084.15	1372.9	0.884827	4748.16	920.187	-0.139394		I	K01716
PEG248	fig|6666666.88372.peg.248	peg.248	CDS	LMR001-002	189111	189560	450	Iron-responsive regulator Irr	Oxidative stress		PEG248	450	3983	5319	5832		3983	4532.27	4106.64	4256.67	945.927	0.187077	4043.85	898.634	0.0448006		P	K09826
PEG249	fig|6666666.88372.peg.249	peg.249	CDS	LMR001-002	190255	189620	636	Mll3219 protein	- none -		PEG249	635	311	476	910		311	401.21	340.686	356.191	56.0931	0.366648	325.929	51.3273	0.130731		S
PEG250	fig|6666666.88372.peg.250	peg.250	CDS	LMR001-002	191159	190371	789	Putative membrane protein	- none -		PEG250	789	1273	2888	2763		1273	2526.65	1615.79	1900.08	240.821	0.988425	1444.65	183.099	0.343439		S
PEG251	fig|6666666.88372.peg.251	peg.251	CDS	LMR001-002	191418	191846	429	hypothetical protein	- none -		PEG251	429	571	424	1166		571	363.928	465.356	467.703	109.022	-0.651046	518.417	120.843	-0.296365		S
PEG252	fig|6666666.88372.peg.252	peg.252	CDS	LMR001-002	192625	192236	390	FIG00418427: hypothetical protein	- none -		PEG252	390	8558	22384	13853		8558	16934.5	10791.5	12742.6	3267.33	0.985856	9671.09	2479.77	0.335788		S
PEG253	fig|6666666.88372.peg.253	peg.253	CDS	LMR001-002	192922	194289	1368	5-Enolpyruvylshikimate-3-phosphate synthase (EC 2.5.1.19)	Chorismate Synthesis, Common Pathway For Synthesis of Aromatic Compounds (DAHP synthase to chorismate)		PEG253	1362	4192	11306	7437		4192	9453.55	5385.64	6820.74	500.789	1.17462	4786.79	351.453	0.362878		E	K00800
PEG254	fig|6666666.88372.peg.254	peg.254	CDS	LMR001-002	194298	194927	630	Cytidylate kinase (EC 2.7.4.25)	Ribosome post-transcriptional modification and chromosomal segregation cluster, pyrimidine conversions		PEG254	630	1112	2947	2276		1112	2584.92	1274.17	1848.33	293.385	1.21731	1192.95	189.358	0.196753		F	K00945
PEG255	fig|6666666.88372.peg.255	peg.255	CDS	LMR001-002	195087	196793	1707	SSU ribosomal protein S1p	Cell division-ribosomal stress proteins cluster, Ribosome SSU bacterial		PEG255	1707	51806	202685	82190		51806	104850	72636.4	78305.4	4587.31	1.0184	62198.5	3643.73	0.488835		J	K02945
PEG256	fig|6666666.88372.peg.256	peg.256	CDS	LMR001-002	198567	196993	1575	FIG01074927: hypothetical protein	- none -		PEG256	1575	3462	5473	5894		3462	4668.98	4148.86	4064.18	258.043	0.432587	3804.13	241.532	0.262197
PEG257	fig|6666666.88372.peg.257	peg.257	CDS	LMR001-002	198855	199184	330	HYPOTHETICAL/UNKNOWN PROTEIN	- none -		PEG257	330	379	383	698		379	328.822	266.191	354.068	107.293	-0.20609	322.753	97.8039	-0.510936
PEG258	fig|6666666.88372.peg.258	peg.258	CDS	LMR001-002	199853	199728	126	hypothetical protein	- none -		PEG258	126	104	86	250		104	62.0744	90.0514	83.0332	65.8994	-0.744403	97.0217	77.0014	-0.207652
PEG259	fig|6666666.88372.peg.259	peg.259	CDS	LMR001-002	202417	200405	2013	Adenylate cyclase (EC 4.6.1.1)	cAMP signaling in bacteria		PEG259	2013	2275	1264	4887		2275	1129.03	3345.1	1702.06	84.5535	-1.01085	2810.1	139.598	0.556121		T	K01768
PEG260	fig|6666666.88372.peg.260	peg.260	CDS	LMR001-002	203515	202484	1032	Hydroxypyruvate reductase (EC 1.1.1.81)	Glycerate metabolism, Glycolate, glyoxylate interconversions, Photorespiration (oxidative C2 cycle)		PEG260	1032	3823	1360	4898		3823	1195.43	3353.6	2507.44	242.969	-1.67583	3586.52	347.531	-0.187652		HE
PEG261	fig|6666666.88372.peg.261	peg.261	CDS	LMR001-002	203937	203611	327	HYPOTHETICAL TRANSMEMBRANE PROTEIN	- none -		PEG261	327	733	319	1053		733	260.785	407.165	496.805	151.928	-1.4906	569.995	174.31	-0.847854
PEG262	fig|6666666.88372.peg.262	peg.262	CDS	LMR001-002	204088	204786	699	Ribonuclease D related protein	- none -		PEG262	699	1625	3756	3336		1625	3280.86	2097.41	2453.21	350.959	1.01315	1861.48	266.306	0.367682		J	K03684
PEG263	fig|6666666.88372.peg.263	peg.263	CDS	LMR001-002	205309	205028	282	FIG01075120: hypothetical protein	- none -		PEG263	278	187	287	597		187	230.01	226.971	208.539	75.0141	0.298134	207.02	74.4675	0.278943		O	K07401
PEG264	fig|6666666.88372.peg.264	peg.264	CDS	LMR001-002	205552	206007	456	FIG01074960: hypothetical protein	- none -		PEG264	454	213	417	1128		213	358.909	443.743	285.861	62.9651	0.754025	328.279	72.308	1.06013		S	K15977
PEG265	fig|6666666.88372.peg.265	peg.265	CDS	LMR001-002	206144	206635	492	Gfa-like protein	- none -		PEG265	492	1910	924	2253		1910	790.644	1256.8	1350.25	274.441	-1.27236	1583.33	321.814	-0.603709		S
PEG266	fig|6666666.88372.peg.266	peg.266	CDS	LMR001-002	206728	207183	456	Maltose O-acetyltransferase (EC 2.3.1.79)	Maltose and Maltodextrin Utilization		PEG266	456	1326	601	1619		1326	496.506	781.411	911.95	199.989	-1.41871	1054.4	231.229	-0.764443		R	K00661
PEG267	fig|6666666.88372.peg.267	peg.267	CDS	LMR001-002	207405	207710	306	acetyltransferase, GNAT family	- none -		PEG267	306	530	416	670		530	358.212	256.284	443.938	145.078	-0.564262	392.974	128.423	-1.04733
PEG268	fig|6666666.88372.peg.268	peg.268	CDS	LMR001-002	208015	207716	300	CcdB	- none -		PEG268	300	352	827	899		352	691.685	335.476	522.028	174.009	0.973021	343.923	114.641	-0.0708848
PEG269	fig|6666666.88372.peg.269	peg.269	CDS	LMR001-002	208248	208015	234	FIG00984817: hypothetical protein	- none -		PEG269	234	424	1008	979		424	889.592	377.259	656.618	280.606	1.0703	400.451	171.133	-0.167292		R
PEG270	fig|6666666.88372.peg.270	peg.270	CDS	LMR001-002	210140	208305	1836	Translation elongation factor LepA	Heat shock dnaK gene cluster extended, Translation elongation factors bacterial, Universal GTPases		PEG270	1832	7412	13581	12382		7412	11011.2	9620.08	9212.17	502.848	0.570828	8516.59	464.879	0.375972		M	K03596
PEG271	fig|6666666.88372.peg.271	peg.271	CDS	LMR001-002	211443	210190	1254	FIG01075110: hypothetical protein	- none -		PEG271	1254	4251	3767	6485		4251	3287.39	4614.71	3766.8	300.382	-0.369226	4430.45	353.306	0.12007		G
PEG272	fig|6666666.88372.peg.272	peg.272	CDS	LMR001-002	211490	212218	729	Transcriptional regulator	- none -		PEG272	721	870	1162	1753		870	1060.96	904.249	965.961	133.975	0.284683	887.606	123.108	0.0541071		K
PEG273	fig|6666666.88372.peg.273	peg.273	CDS	LMR001-002	212220	212747	528	GCN5-related N-acetyltransferase	- none -		PEG273	526	401	395	1202		401	340.945	486.467	370.906	70.5144	-0.233584	443.667	84.3473	0.279218		R
PEG274	fig|6666666.88372.peg.274	peg.274	CDS	LMR001-002	212849	213874	1026	Acetylpolyamine aminohydrolase	- none -		PEG274	1026	1913	1202	3085		1913	1092.34	1897.85	1503.3	146.52	-0.809365	1906.05	185.775	-0.0124148		BQ
PEG275	fig|6666666.88372.peg.275	peg.275	CDS	LMR001-002	213974	214324	351	hypothetical protein	- none -		PEG275	350	458	405	1037		458	349.228	401.414	403.685	115.338	-0.391627	429.778	122.794	-0.190705
PEG276	fig|6666666.88372.peg.276	peg.276	CDS	LMR001-002	214975	214337	639	exopolysaccharide synthesis protein ExoD-related protein	- none -		PEG276	639	2188	2586	3821		2188	2250.94	2461.26	2219.35	347.316	0.0410697	2324.51	363.774	0.169944		R
PEG277	fig|6666666.88372.peg.277	peg.277	CDS	LMR001-002	215230	215093	138	hypothetical protein	- none -		PEG277	138	26	37	142		26	26.1612	44.3779	26.0814	18.8996	0.00882823	35.1897	25.4998	0.771241
PEG278	fig|6666666.88372.peg.278	peg.278	CDS	LMR001-002	215248	215913	666	Outer membrane lipoprotein omp16 precursor	Ton and Tol transport systems		PEG278	666	11091	10742	14595		11091	9038.68	11365.7	10065.2	1511.29	-0.295303	11228.7	1685.99	0.0351949		M
PEG279	fig|6666666.88372.peg.279	peg.279	CDS	LMR001-002	216806	215994	813	Tetracenomycin polyketide synthesis O-methyltransferase tcmP (EC 2.1.1.-)	- none -		PEG279	813	381	584	1544		381	481.649	720.686	431.357	53.0575	0.337941	550.876	67.7584	0.91933		Q
PEG280	fig|6666666.88372.peg.280	peg.280	CDS	LMR001-002	217957	216905	1053	Lysyl-lysine 2,3-aminomutase	Translation elongation factor P lysylation		PEG280	1048	805	1568	2258		805	1358.54	1261.18	1081.96	103.24	0.754315	1033.28	98.5953	0.647036		E	K01843
PEG281	fig|6666666.88372.peg.281	peg.281	CDS	LMR001-002	219006	217954	1053	Translation elongation factor P Lys34:lysine transferase	Translation elongation factor P lysylation		PEG281	1053	866	1589	2542		866	1378.44	1452.42	1122.7	106.619	0.668995	1159.69	110.132	0.744417		J	K04568
PEG282	fig|6666666.88372.peg.282	peg.282	CDS	LMR001-002	219167	219736	570	Translation elongation factor P	Translation elongation factor P lysylation, Translation elongation factors bacterial		PEG282	570	3280	10406	7410		3280	8771.42	5371.85	6026.19	1057.23	1.4187	4326.4	759.018	0.711304		J	K02356
PEG283	fig|6666666.88372.peg.283	peg.283	CDS	LMR001-002	219924	221165	1242	Cyclopropane-fatty-acyl-phospholipid synthase (EC 2.1.1.79)	- none -		PEG283	1242	6605	5158	7916		6605	4383.06	5797.57	5495	442.431	-0.592043	6202.25	499.376	-0.188532		M	K00574
PEG284	fig|6666666.88372.peg.284	peg.284	CDS	LMR001-002	221286	222269	984	Hypothetical transmembrane iron-regulated protein	- none -		PEG284	984	1493	1575	3030		1493	1365.07	1847.59	1428.93	145.217	-0.129042	1670.19	169.735	0.307626		S
PEG285	fig|6666666.88372.peg.285	peg.285	CDS	LMR001-002	222857	222339	519	COGs COG3672	- none -		PEG285	519	6982	5831	9993		6982	5017.19	7652.24	5999.76	1156.02	-0.476828	7317.28	1409.88	0.132174		S
PEG286	fig|6666666.88372.peg.286	peg.286	CDS	LMR001-002	224051	223245	807	2-hydroxymuconic semialdehyde hydrolase (EC 3.1.1.-)	- none -		PEG286	807	2110	2450	2853		2110	2135.96	1690.59	2122.3	262.986	0.0185827	1899.61	235.391	-0.318778		R
PEG287	fig|6666666.88372.peg.287	peg.287	CDS	LMR001-002	224407	224805	399	Translation initiation factor 3	Mycobacterium virulence operon involved in protein synthesis (LSU ribosomal proteins), Translation initiation factors bacterial		PEG287	399	19964	30134	25887		19964	21683.3	21044.4	20817.9	5217.53	0.120004	20498.5	5137.48	0.0768599		J	K02520
PEG288	fig|6666666.88372.peg.288	peg.288	CDS	LMR001-002	225057	225260	204	LSU ribosomal protein L35p	Mycobacterium virulence operon involved in protein synthesis (LSU ribosomal proteins), Ribosome LSU bacterial		PEG288	204	9798	29569	15341		9798	21348	11979.5	15571.4	7633.05	1.124	10887.2	5336.86	0.290465		J	K02916
PEG289	fig|6666666.88372.peg.289	peg.289	CDS	LMR001-002	225297	225701	405	LSU ribosomal protein L20p	Mycobacterium virulence operon involved in protein synthesis (LSU ribosomal proteins), Ribosome LSU bacterial		PEG289	405	14751	39573	24727		14751	27207.3	20010.4	20982.2	5180.79	0.882589	17383.8	4292.28	0.439347		J	K02887
PEG290	fig|6666666.88372.peg.290	peg.290	CDS	LMR001-002	225892	226974	1083	Phenylalanyl-tRNA synthetase alpha chain (EC 6.1.1.20)	tRNA aminoacylation, Phe		PEG290	1083	4588	10225	7637		4588	8638.9	5556.13	6615.44	610.844	0.91173	5074.05	468.518	0.274963		J	K01889
PEG291	fig|6666666.88372.peg.291	peg.291	CDS	LMR001-002	227009	229435	2427	Phenylalanyl-tRNA synthetase beta chain (EC 6.1.1.20)	tRNA aminoacylation, Phe		PEG291	2427	7735	16920	13156		7735	13304.4	10223.1	10515.6	433.276	0.783961	8974.97	369.797	0.403894		J	K01890
PEG292	fig|6666666.88372.peg.292	peg.292	CDS	LMR001-002	230047	229607	441	hypothetical protein	- none -		PEG292	441	464	1373	1484		464	1204.31	673.985	834.414	189.21	1.37441	569.25	129.082	0.536991		E
PEG293	fig|6666666.88372.peg.293	peg.293	CDS	LMR001-002	230399	230040	360	hypothetical protein	- none -		PEG293	360	441	1433	1276		441	1245.59	536.66	843.074	234.187	1.49944	488.607	135.724	0.284685
PEG294	fig|6666666.88372.peg.294	peg.294	CDS	LMR001-002	230534	230650	117	hypothetical protein	- none -		PEG294	117	56	93	120		56	66.8649	35.491	61.4203	52.496	0.256446	45.7334	39.0884	-0.657349
PEG295	fig|6666666.88372.peg.295	peg.295	CDS	LMR001-002	231175	230684	492	Protein yciF	- none -		PEG295	492	1120	3283	3379		1120	2918.13	2129.91	2018.79	410.322	1.38227	1624.67	330.218	0.928017		S
PEG296	fig|6666666.88372.peg.296	peg.296	CDS	LMR001-002	231177	232166	990	3-oxoacyl-[acyl-carrier protein] reductase (EC 1.1.1.100)	CBSS-246196.1.peg.364, Fatty Acid Biosynthesis FASII		PEG296	990	532	573	1566		532	472.972	737.686	502.54	50.7616	-0.169966	634.897	64.131	0.471286		IQR
PEG297	fig|6666666.88372.peg.297	peg.297	CDS	LMR001-002	232201	232839	639	HYPOTHETICAL/UNKNOWN PROTEIN	- none -		PEG297	639	1350	1837	2143		1350	1583.37	1163.65	1466.17	229.447	0.231151	1256.31	196.605	-0.213196
PEG298	fig|6666666.88372.peg.298	peg.298	CDS	LMR001-002	233812	232832	981	Oxidoreductase	- none -		PEG298	981	3163	8152	5860		3163	6883.97	4127.52	5023.13	512.041	1.12228	3644.9	371.549	0.384311		C
PEG299	fig|6666666.88372.peg.299	peg.299	CDS	LMR001-002	233811	233939	129	hypothetical protein	- none -		PEG299	77	4	7	116		4	6.00168	33.9385	5.00056	6.49424	0.585566	18.969	24.635	3.08505
PEG300	fig|6666666.88372.peg.300	peg.300	CDS	LMR001-002	234034	235020	987	Glucose-fructose oxidoreductase (EC 1.1.99.28)	- none -		PEG300	987	5616	4582	7341		5616	3907.42	5317.06	4758.95	482.163	-0.521907	5463.77	553.573	-0.0774961		R
PEG301	fig|6666666.88372.peg.301	peg.301	CDS	LMR001-002	235555	235145	411	HYPOTHETICAL TRANSMEMBRANE PROTEIN	- none -		PEG301	411	513	586	954		513	483.905	364.547	498.383	121.261	-0.0838438	438.704	106.741	-0.492462
PEG302	fig|6666666.88372.peg.302	peg.302	CDS	LMR001-002	235683	236462	780	FIG01074011: hypothetical protein	- none -		PEG302	780	349	392	1124		349	337.83	442.317	343.485	44.0366	-0.0475083	395.729	50.7345	0.341274		K
PEG303	fig|6666666.88372.peg.303	peg.303	CDS	LMR001-002	236542	238122	1581	Exodeoxyribonuclease VII large subunit (EC 3.1.11.6)	DNA repair, bacterial, Purine salvage cluster		PEG303	1581	4113	9005	6865		4113	7602.05	4934.04	5856.77	370.447	0.886725	4522.77	286.07	0.263106		L	K03601
PEG304	fig|6666666.88372.peg.304	peg.304	CDS	LMR001-002	238135	238722	588	NAD(P)H dehydrogenase [quinone] 1 (EC 1.6.5.2)	- none -		PEG304	588	442	1210	1443		442	1098.05	647.578	769.812	130.92	1.31423	544.574	92.6147	0.55241		R	K00358
PEG305	fig|6666666.88372.peg.305	peg.305	CDS	LMR001-002	239293	238796	498	Transcriptional regulator, MarR family	- none -		PEG305	497	387	843	1001		387	704.516	386.651	545.887	109.836	0.863338	386.954	77.858	-0.00226134		K
PEG306	fig|6666666.88372.peg.306	peg.306	CDS	LMR001-002	239427	240302	876	Permease of the drug/metabolite transporter (DMT) superfamily	Queuosine-Archaeosine Biosynthesis		PEG306	876	477	1055	1628		477	946.23	791.533	711.88	81.2648	0.986602	634.531	72.4351	0.72906		R	K15269
PEG307	fig|6666666.88372.peg.307	peg.307	CDS	LMR001-002	241613	240357	1257	Aminopeptidase S (Leu, Val, Phe, Tyr preference) (EC 3.4.11.24)	Aminopeptidases (EC 3.4.11.-)		PEG307	1257	8547	12951	11244		8547	10576	8713.74	9563.32	760.805	0.306682	8632.2	686.731	0.0272552		E	K01269
PEG308	fig|6666666.88372.peg.308	peg.308	CDS	LMR001-002	242368	241682	687	Glutathione S-transferase	- none -		PEG308	687	683	710	1386		683	587.955	611.176	635.147	92.4522	-0.214783	646.757	94.1423	-0.1589		O	K00799
PEG309	fig|6666666.88372.peg.309	peg.309	CDS	LMR001-002	242463	242915	453	PUTATIVE TRANSCRIPTION REGULATION PROTEIN	- none -		PEG309	448	256	425	883		256	364.593	327.648	310.226	69.2468	0.510939	291.753	65.1235	0.356802		K
PEG310	fig|6666666.88372.peg.310	peg.310	CDS	LMR001-002	243796	243323	474	Cys-tRNA(Pro) deacylase YbaK	tRNA aminoacylation, Pro		PEG310	472	827	767	1438		827	641.553	645.469	734.747	155.667	-0.367962	736.706	156.082	-0.359182		S
PEG311	fig|6666666.88372.peg.311	peg.311	CDS	LMR001-002	244150	243800	351	FIG138056: a glutathione-dependent thiol reductase	A Glutathione-dependent Thiol Reductase Associated with a Step in Lysine Biosynthesis		PEG311	351	1914	1769	2680		1914	1530.06	1552.36	1722.16	490.643	-0.323198	1733.31	493.82	-0.302318		P
PEG312	fig|6666666.88372.peg.312	peg.312	CDS	LMR001-002	244891	244238	654	hypothetical protein	- none -		PEG312	654	3530	3814	4209		3530	3320.32	2776.81	3426.08	523.865	-0.0890937	3154.32	482.312	-0.34699		S
PEG313	fig|6666666.88372.peg.313	peg.313	CDS	LMR001-002	246143	244905	1239	Aspartate aminotransferase (EC 2.6.1.1)	CBSS-216591.1.peg.168, Glutamine, Glutamate, Aspartate and Asparagine Biosynthesis, Threonine and Homoserine Biosynthesis		PEG313	1239	11010	9075	12129		11010	7673.02	9422.81	9344.2	754.173	-0.521655	10219.1	824.786	-0.225291		E	K00832
PEG314	fig|6666666.88372.peg.314	peg.314	CDS	LMR001-002	246287	246757	471	Transcriptional regulator, AsnC family	- none -		PEG314	470	756	1340	1351		756	1179.87	587.221	968.352	206.032	0.640583	672.027	142.984	-0.366071		K	K03719
PEG315	fig|6666666.88372.peg.315	peg.315	CDS	LMR001-002	247861	246800	1062	Succinylglutamate desuccinylase/aspartoacylase	- none -		PEG315	1062	1231	1596	2635		1231	1384.81	1519.9	1307.54	123.121	0.170717	1375.08	129.48	0.304998		R	K06987
PEG316	fig|6666666.88372.peg.316	peg.316	CDS	LMR001-002	248435	247965	471	Putative ligase protein (EC 6.-.-.-)	- none -		PEG316	469	106	77	621		106	55.5938	236.669	80.7596	17.2195	-0.930051	171.297	36.5239	1.15982			K01975
PEG317	fig|6666666.88372.peg.317	peg.317	CDS	LMR001-002	248840	249334	495	Transcriptional regulator, MarR family	- none -		PEG317	493	631	1567	1351		631	1358.54	587.221	994.747	201.774	1.10644	609.089	123.548	-0.103639		K
PEG318	fig|6666666.88372.peg.318	peg.318	CDS	LMR001-002	249420	250025	606	Acetyltransferase (EC 2.3.1.-)	- none -		PEG318	606	350	748	913		350	624.222	341.754	487.083	80.3768	0.83493	345.85	57.0709	-0.0341711		R	K06976
PEG319	fig|6666666.88372.peg.319	peg.319	CDS	LMR001-002	251062	250175	888	Small molecule metabolism; Amino acid biosynthesis; arginine	- none -		PEG319	885	251	655	1123		251	538.905	440.9	395.047	44.6381	1.10126	346.044	39.101	0.811679		E	K01476
PEG320	fig|6666666.88372.peg.320	peg.320	CDS	LMR001-002	252688	251126	1563	GMP synthase [glutamine-hydrolyzing] (EC 6.3.5.2)	Purine conversions		PEG320	1563	4514	11643	8621		4514	9684.12	6428.43	7101.34	454.34	1.09976	5473.49	350.192	0.508604		F	K01951
PEG321	fig|6666666.88372.peg.321	peg.321	CDS	LMR001-002	253489	252851	639	5'-methylthioadenosine nucleosidase (EC 3.2.2.16) / S-adenosylhomocysteine nucleosidase (EC 3.2.2.9)	Adenosyl nucleosidases, Adenosyl nucleosidases, Methionine Biosynthesis, Methionine Degradation, Polyamine Metabolism		PEG321	639	2966	1600	3546		2966	1388.12	2248.23	2176.48	340.607	-1.09482	2606.53	407.908	-0.39916		F	K01243
PEG322	fig|6666666.88372.peg.322	peg.322	CDS	LMR001-002	253941	253486	456	Phenylacetic acid degradation protein PaaD, thioesterase	- none -		PEG322	456	3123	1558	3862		3123	1352.04	2497.42	2239.06	491.022	-1.20922	2811.75	616.612	-0.323914		Q
PEG323	fig|6666666.88372.peg.323	peg.323	CDS	LMR001-002	254115	254669	555	PhnO protein	Alkylphosphonate utilization		PEG323	555	437	231	1263		437	185.496	526.687	311.006	56.0371	-1.23465	481.601	86.775	0.270911		M
PEG324	fig|6666666.88372.peg.324	peg.324	CDS	LMR001-002	255794	254706	1089	putative exported protein	- none -		PEG324	1088	373	581	1326		373	479.425	570.581	426.337	39.1854	0.361161	471.915	43.3746	0.612288		S	K09947
PEG325	fig|6666666.88372.peg.325	peg.325	CDS	LMR001-002	256870	255881	990	Magnesium and cobalt transport protein CorA	Magnesium transport		PEG325	990	2108	2217	3598		2108	1940.82	2284.99	2024.72	204.518	-0.119639	2196.81	221.9	0.11588		P	K03284
PEG326	fig|6666666.88372.peg.326	peg.326	CDS	LMR001-002	258270	257143	1128	Iron-regulated protein A precursor	- none -		PEG326	1123	724	690	2104		724	569.991	1135.79	647.214	57.6326	-0.345918	930.114	82.8241	0.648769		R	K07338
PEG327	fig|6666666.88372.peg.327	peg.327	CDS	LMR001-002	260051	258270	1782	Probable thiol oxidoreductase with 2 cytochrome c heme-binding sites	- none -		PEG327	1780	923	1079	3358		923	974.686	2113.66	948.629	53.2938	0.0792775	1518.12	85.2875	1.19601		C
PEG328	fig|6666666.88372.peg.328	peg.328	CDS	LMR001-002	261376	260099	1278	Iron-regulated protein A precursor	- none -		PEG328	1278	5586	7023	8560		5586	6022.48	6355.5	5803.59	454.115	0.108877	5970.1	467.144	0.186526		P	K07231
PEG329	fig|6666666.88372.peg.329	peg.329	CDS	LMR001-002	262817	261528	1290	Sun protein	- none -		PEG329	1290	2431	8019	4381		2431	6779.11	2931.41	4605.66	357.028	1.47883	2681.8	207.892	0.269329		J	K03500
PEG330	fig|6666666.88372.peg.330	peg.330	CDS	LMR001-002	262786	262926	141	hypothetical protein	- none -		PEG330	141	84	1277	381		84	1136.2	140.43	610.071	432.674	3.75861	112.188	79.5659	0.742317
PEG331	fig|6666666.88372.peg.331	peg.331	CDS	LMR001-002	263169	262948	222	Rare lipoprotein A	- none -		PEG331	222	858	14389	3923		858	11553.4	2548.15	6205.24	2795.15	3.75282	1702.59	766.934	1.57202		M	K03642
PEG332	fig|6666666.88372.peg.332	peg.332	CDS	LMR001-002	264661	263786	876	Nucleoside-diphosphate-sugar epimerases	CBSS-296591.1.peg.2330		PEG332	876	1299	1770	1938		1299	1530.06	1033.5	1415.11	161.543	0.234886	1166.84	133.201	-0.331155		MG
PEG333	fig|6666666.88372.peg.333	peg.333	CDS	LMR001-002	265821	264649	1173	Iron-sulfur cluster-binding protein	Scaffold proteins for [4Fe-4S] cluster assembly (MRP family)		PEG333	1172	842	1830	2089		842	1576.6	1126.5	1209	103.157	0.905962	983.949	83.9547	0.420995		C
PEG334	fig|6666666.88372.peg.334	peg.334	CDS	LMR001-002	266500	265832	669	Glutathione S-transferase family protein	Glutathione: Non-redox reactions, Scaffold proteins for [4Fe-4S] cluster assembly (MRP family)		PEG334	669	1341	3890	2700		1341	3381.24	1566.68	2360.46	352.834	1.33567	1453.18	217.217	0.225826		O	K00799
PEG335	fig|6666666.88372.peg.335	peg.335	CDS	LMR001-002	266681	267487	807	Undecaprenyl-diphosphatase (EC 3.6.1.27)	- none -		PEG335	807	1395	1627	2830		1395	1411.67	1674.28	1404.02	173.98	0.0157202	1535.33	190.251	0.261865		V	K06153
PEG336	fig|6666666.88372.peg.336	peg.336	CDS	LMR001-002	267774	267613	162	HYPOTHETICAL SIGNAL PEPTIDE PROTEIN	- none -		PEG336	162	476	966	921		476	840.324	346.183	658.377	406.406	0.818678	411.307	253.893	-0.460734
PEG337	fig|6666666.88372.peg.337	peg.337	CDS	LMR001-002	269005	268025	981	NADH-UBIQUINONE OXIDOREDUCTASE 39 KD SUBUNIT (EC 1.6.5.3)	- none -		PEG337	981	3980	6250	6551		3980	5395.93	4664.26	4688.5	477.931	0.438715	4322.66	440.639	0.22849		MG	K00329
PEG338	fig|6666666.88372.peg.338	peg.338	CDS	LMR001-002	269425	269138	288	FIG01306808: hypothetical protein	- none -		PEG338	288	1266	1841	2101		1266	1586.77	1132.65	1425.76	495.054	0.32726	1198.69	416.212	-0.159141		S
PEG339	fig|6666666.88372.peg.339	peg.339	CDS	LMR001-002	270264	269560	705	Orotidine 5'-phosphate decarboxylase (EC 4.1.1.23)	De Novo Pyrimidine Synthesis, Riboflavin synthesis cluster		PEG339	705	2411	3328	4118		2411	2954.51	2704.17	2682.21	380.455	0.293943	2557.04	362.7	0.166208		F	K01591
PEG340	fig|6666666.88372.peg.340	peg.340	CDS	LMR001-002	270853	270272	582	Mlr7505 protein	- none -		PEG340	582	1159	1956	1949		1159	1684.58	1041.67	1421.68	244.275	0.539789	1100.22	189.042	-0.15371		G
PEG341	fig|6666666.88372.peg.341	peg.341	CDS	LMR001-002	271556	270954	603	Phosphatidylethanolamine N-methyltransferase (EC 2.1.1.17) @ Phosphatidyl-N-methylethanolamine N-methyltransferase (EC 2.1.1.71) @ Phosphatidyl-N-dimethylethanolamine N-methyltransferase	- none -		PEG341	603	6106	8776	7732		6106	7406.06	5629.38	6757.74	1120.69	0.27767	5869.4	973.367	-0.118059		I	K00570
PEG342	fig|6666666.88372.peg.342	peg.342	CDS	LMR001-002	272877	271759	1119	DNA polymerase III beta subunit (EC 2.7.7.7)	Cell Division Subsystem including YidCD, DNA replication cluster 1		PEG342	1119	23311	21515	26775		23311	16380.3	21844.5	19857.5	1774.57	-0.510504	22589.5	2018.72	-0.0952007		L	K02338
PEG343	fig|6666666.88372.peg.343	peg.343	CDS	LMR001-002	272830	272991	162	hypothetical protein	- none -		PEG343	162	195	281	354		195	225.13	130.435	210.057	129.665	0.207397	162.71	100.438	-0.580024
PEG344	fig|6666666.88372.peg.344	peg.344	CDS	LMR001-002	273132	274061	930	rRNA small subunit methyltransferase I	16S rRNA modification within P site of ribosome, Heat shock dnaK gene cluster extended		PEG344	930	1502	2333	2576		1502	2037	1476.6	1770.07	190.33	0.438461	1489.87	160.201	-0.025707		R	K07056
PEG345	fig|6666666.88372.peg.345	peg.345	CDS	LMR001-002	274051	274419	369	Endonuclease (EC 3.1.-.-)	- none -		PEG345	369	184	302	491		184	243.137	183.972	213.607	57.8881	0.401457	184.025	49.8712	-0.000823535		L	K07460
PEG346	fig|6666666.88372.peg.346	peg.346	CDS	LMR001-002	274540	274376	165	hypothetical protein	- none -		PEG346	161	28	40	126		28	28.258	37.8166	28.1239	17.4683	0.0137564	32.9032	20.4368	0.434117
PEG347	fig|6666666.88372.peg.347	peg.347	CDS	LMR001-002	274583	275881	1299	Glycerol-3-phosphate ABC transporter, periplasmic glycerol-3-phosphate-binding protein (TC 3.A.1.1.3)	Glycerol and Glycerol-3-phosphate Uptake and Utilization		PEG347	1291	140	320	1132		140	261.544	446.524	200.751	15.5501	0.902053	293.242	22.7143	1.67374		G	K05813
PEG348	fig|6666666.88372.peg.348	peg.348	CDS	LMR001-002	276308	276883	576	Glycerol-3-phosphate ABC transporter, permease protein UgpA (TC 3.A.1.1.3)	Glycerol and Glycerol-3-phosphate Uptake and Utilization		PEG348	560	93	131	428		93	96.7808	158.923	94.8387	16.9355	0.059095	125.91	22.4839	0.774629		G	K05814
PEG349	fig|6666666.88372.peg.349	peg.349	CDS	LMR001-002	276894	277736	843	Glycerol-3-phosphate ABC transporter, permease protein UgpE (TC 3.A.1.1.3)	Glycerol and Glycerol-3-phosphate Uptake and Utilization		PEG349	843	137	261	891		137	210.187	331.467	173.638	20.5976	0.616569	234.277	27.7909	1.27376		G	K05815
PEG350	fig|6666666.88372.peg.350	peg.350	CDS	LMR001-002	277869	278981	1113	Glycerol-3-phosphate ABC transporter, ATP-binding protein UgpC (TC 3.A.1.1.3)	Glycerol and Glycerol-3-phosphate Uptake and Utilization		PEG350	1113	194	210	1230		194	166.103	504.802	180.096	16.1811	-0.22464	349.445	31.3967	1.379		G	K05816
PEG351	fig|6666666.88372.peg.351	peg.351	CDS	LMR001-002	278978	279970	993	FIG00917825: hypothetical protein	- none -		PEG351	990	207	183	1173		207	140.711	468.426	173.863	17.5619	-0.556991	337.72	34.1131	1.17809
PEG352	fig|6666666.88372.peg.352	peg.352	CDS	LMR001-002	280150	281097	948	Glutathione synthetase (EC 6.3.2.3)	Cluster containing Glutathione synthetase, Glutathione: Biosynthesis and gamma-glutamyl cycle, Heat shock dnaK gene cluster extended		PEG352	948	7074	4904	8581		7074	4179.48	6391.57	5629.47	593.826	-0.760314	6735.51	710.497	-0.147469		HJ	K01920
PEG353	fig|6666666.88372.peg.353	peg.353	CDS	LMR001-002	281292	282824	1533	MG(2+) CHELATASE FAMILY PROTEIN / ComM-related protein	- none -		PEG353	1533	4060	2929	5697		4060	2569.93	4001.78	3317.18	216.385	-0.661325	4033.1	263.086	-0.022414		O	K07391
PEG354	fig|6666666.88372.peg.354	peg.354	CDS	LMR001-002	283008	283145	138	hypothetical protein	- none -		PEG354	138	196	117	437		196	85.5492	162.599	140.717	101.969	-1.19518	179.242	129.885	-0.268688
PEG355	fig|6666666.88372.peg.355	peg.355	CDS	LMR001-002	283124	283402	279	hypothetical protein	- none -		PEG355	279	274	152	710		274	113.469	269.785	193.813	69.467	-1.27271	271.971	97.4807	-0.023196
PEG356	fig|6666666.88372.peg.356	peg.356	CDS	LMR001-002	283399	284610	1212	hypothetical protein	- none -		PEG356	1212	1163	676	2606		1163	557.172	1498.26	860.649	71.0107	-1.06305	1331.19	109.834	0.364039		S
PEG357	fig|6666666.88372.peg.357	peg.357	CDS	LMR001-002	285763	284795	969	Cysteine synthase (EC 2.5.1.47)	Cysteine Biosynthesis, Methionine Biosynthesis		PEG357	969	2636	3216	4101		2636	2862.22	2688.54	2749.28	283.723	0.118603	2662.43	274.761	0.02829		E	K01738
PEG358	fig|6666666.88372.peg.358	peg.358	CDS	LMR001-002	286263	285958	306	hypothetical protein	- none -		PEG358	306	970	1614	1628		970	1401.72	791.533	1186.11	387.619	0.530382	881.021	287.916	-0.294094
PEG359	fig|6666666.88372.peg.359	peg.359	CDS	LMR001-002	287174	286260	915	Permease of the drug/metabolite transporter (DMT) superfamily	Queuosine-Archaeosine Biosynthesis		PEG359	915	720	1195	1499		720	1086.78	686.054	903.116	98.7012	0.595101	702.751	76.8034	-0.0685704		R
PEG360	fig|6666666.88372.peg.360	peg.360	CDS	LMR001-002	287298	287744	447	Leucine-responsive regulatory protein, regulator for leucine (or lrp) regulon and high-affinity branched-chain amino acid transport system	Branched-Chain Amino Acid Biosynthesis, Glutamine, Glutamate, Aspartate and Asparagine Biosynthesis		PEG360	447	1242	1259	1485		1242	1125.65	676.428	1183.65	264.799	-0.141507	959.04	214.55	-0.876253		K	K03719
PEG361	fig|6666666.88372.peg.361	peg.361	CDS	LMR001-002	288356	287802	555	Deoxyuridine 5'-triphosphate nucleotidohydrolase (EC 3.6.1.23)	Housecleaning nucleoside triphosphate pyrophosphatases, Nudix proteins (nucleoside triphosphate hydrolases)		PEG361	553	941	1536	1709		941	1329.66	865.318	1135.77	205.384	0.497426	903.604	163.4	-0.122328		F	K01520
PEG362	fig|6666666.88372.peg.362	peg.362	CDS	LMR001-002	288371	289954	1584	Peptide chain release factor 3	Translation termination factors bacterial		PEG362	1583	2107	7673	4928		2107	6509.62	3378.25	4309.12	272.213	1.62627	2743.44	173.306	0.679971		J	K02837
PEG363	fig|6666666.88372.peg.363	peg.363	CDS	LMR001-002	290583	290125	459	hypothetical protein	- none -		PEG363	459	1474	1041	2282		1474	929.436	1277.97	1200.87	261.628	-0.663657	1375.14	299.595	-0.204228
PEG364	fig|6666666.88372.peg.364	peg.364	CDS	LMR001-002	291306	290614	693	FIG00986051: hypothetical protein	- none -		PEG364	693	602	379	1313		602	325.085	560.64	463.822	66.9296	-0.890287	581.6	83.9249	-0.104029		S
PEG365	fig|6666666.88372.peg.365	peg.365	CDS	LMR001-002	292237	291311	927	Permease of the drug/metabolite transporter (DMT) superfamily	Queuosine-Archaeosine Biosynthesis		PEG365	925	273	244	1275		273	196.359	536.66	234.629	25.3652	-0.474865	404.779	43.7599	0.975646		R
PEG366	fig|6666666.88372.peg.366	peg.366	CDS	LMR001-002	293108	292320	789	Transcriptional regulator, AraC family	- none -		PEG366	789	328	372	1286		328	317.382	542.647	322.738	40.9047	-0.0478963	435.371	55.1801	0.7259		K
PEG367	fig|6666666.88372.peg.367	peg.367	CDS	LMR001-002	293220	293744	525	Predicted transcriptional regulators	- none -		PEG367	525	1545	1797	2507		1545	1553.3	1429.64	1549.28	295.101	0.00749509	1487.45	283.323	-0.112191
PEG368	fig|6666666.88372.peg.368	peg.368	CDS	LMR001-002	293868	294851	984	UDP-glucose 4-epimerase (EC 5.1.3.2)	CBSS-296591.1.peg.2330, N-linked Glycosylation in Bacteria, Rhamnose containing glycans		PEG368	984	795	2611	2055		795	2270.82	1106.52	1532.58	155.75	1.51541	950.423	96.5877	0.47822		MG	K01784
PEG369	fig|6666666.88372.peg.369	peg.369	CDS	LMR001-002	295316	294912	405	Gfa-like protein	- none -		PEG369	405	463	1537	1250		463	1332.82	518.523	898.131	221.761	1.524	490.985	121.231	0.162004		S
PEG370	fig|6666666.88372.peg.370	peg.370	CDS	LMR001-002	296194	295394	801	5-deoxy-glucuronate isomerase (EC 5.3.1.-)	Inositol catabolism		PEG370	799	1515	7518	3113		1515	6389.91	1923.09	3951.73	494.585	2.07785	1718.32	215.059	0.345477		G	K03337
PEG371	fig|6666666.88372.peg.371	peg.371	CDS	LMR001-002	297347	296436	912	Inosose dehydratase (EC 4.2.1.44)	Inositol catabolism		PEG371	912	1524	7339	2906		1524	6260.55	1736.33	3892.3	426.788	2.03838	1630.19	178.749	0.188124		G	K03335
PEG372	fig|6666666.88372.peg.372	peg.372	CDS	LMR001-002	299366	297513	1854	Epi-inositol hydrolase (EC 3.7.1.-)	Inositol catabolism		PEG372	1854	2929	12850	4800		2929	10514.8	3277.08	6722.85	362.613	1.84301	3103.99	167.421	0.161073		E	K03336
PEG373	fig|6666666.88372.peg.373	peg.373	CDS	LMR001-002	301373	299433	1941	5-keto-2-deoxygluconokinase (EC 2.7.1.92) / uncharacterized domain	Inositol catabolism, Inositol catabolism		PEG373	1941	2091	14660	4520		2091	11734.2	3046.68	6911.76	356.093	2.48963	2567.99	132.302	0.544219		SG	K03338
PEG374	fig|6666666.88372.peg.374	peg.374	CDS	LMR001-002	302343	301483	861	Predicted transcriptional regulator of the myo-inositol catabolic operon	Inositol catabolism		PEG374	860	2127	6005	3535		2127	5182.71	2236.37	3655.42	425.049	1.28411	2182.26	253.751	0.0715684		K
PEG375	fig|6666666.88372.peg.375	peg.375	CDS	LMR001-002	303610	302480	1131	Myo-inositol 2-dehydrogenase 2 (EC 1.1.1.18)	Inositol catabolism		PEG375	1131	1660	3435	2405		1660	3037.43	1365.37	2348.51	207.649	0.872026	1512.48	133.729	-0.281535		R
PEG376	fig|6666666.88372.peg.376	peg.376	CDS	LMR001-002	303876	304721	846	Glutamine amidotransferases class-II	- none -		PEG376	846	1987	2096	3424		1987	1825.3	2162.74	1905.7	225.26	-0.121803	2074.42	245.203	0.122924		R	K07008
PEG377	fig|6666666.88372.peg.377	peg.377	CDS	LMR001-002	305969	304764	1206	Phosphopantothenoylcysteine decarboxylase (EC 4.1.1.36) / Phosphopantothenoylcysteine synthetase (EC 6.3.2.5)	Coenzyme A Biosynthesis, Coenzyme A Biosynthesis		PEG377	1206	2430	2676	3951		2430	2320.69	2570.24	2376.45	197.052	-0.0677078	2501.22	207.398	0.0796391		H	K13038
PEG378	fig|6666666.88372.peg.378	peg.378	CDS	LMR001-002	306115	306573	459	Rrf2 family transcriptional regulator, group III	Rrf2 family transcriptional regulators		PEG378	446	280	521	946		280	435.41	359.802	357.654	80.1915	0.637474	319.85	71.7152	0.362301		K
PEG379	fig|6666666.88372.peg.379	peg.379	CDS	LMR001-002	306563	306706	144	Thioredoxin reductase (EC 1.8.1.9)	Thioredoxin-disulfide reductase, pyrimidine conversions		PEG379	141	79	109	203		79	79.0361	70.4839	79.052	56.0652	-0.000579397	74.7759	53.0325	-0.165798		O
PEG380	fig|6666666.88372.peg.380	peg.380	CDS	LMR001-002	306703	307452	750	Thioredoxin reductase (EC 1.8.1.9)	Thioredoxin-disulfide reductase, pyrimidine conversions		PEG380	750	560	1011	1486		560	895.255	676.428	727.506	97.0008	0.677496	618.093	82.4124	0.273134		O
PEG381	fig|6666666.88372.peg.381	peg.381	CDS	LMR001-002	308341	307565	777	3-oxoacyl-[acyl-carrier protein] reductase (EC 1.1.1.100)	CBSS-246196.1.peg.364, Fatty Acid Biosynthesis FASII		PEG381	777	2335	2257	3109		2335	1975.57	1923.09	2154.52	277.287	-0.240197	2128.27	273.909	-0.279045		IQR	K00059
PEG382	fig|6666666.88372.peg.382	peg.382	CDS	LMR001-002	308939	308421	519	Acetyltransferase, GNAT family	- none -		PEG382	519	3000	2504	3359		3000	2182.75	2113.66	2590.96	499.221	-0.458412	2556.41	492.565	-0.504813		M	K03825
PEG383	fig|6666666.88372.peg.383	peg.383	CDS	LMR001-002	310705	309131	1575	Ubiquinone biosynthesis monooxygenase UbiB	- none -		PEG383	1575	4988	6678	8142		4988	5755.43	5990.84	5372.14	341.088	0.206218	5489.84	348.561	0.264052		R	K03688
PEG384	fig|6666666.88372.peg.384	peg.384	CDS	LMR001-002	311486	310710	777	Ubiquinone/menaquinone biosynthesis methyltransferase UbiE (EC 2.1.1.-)	Menaquinone and Phylloquinone Biosynthesis		PEG384	777	4847	5806	7663		4847	4992.05	5570.56	4916.89	632.804	0.0441128	5206.14	670.031	0.202302		H	K03183
PEG385	fig|6666666.88372.peg.385	peg.385	CDS	LMR001-002	311712	312602	891	Formamidopyrimidine-DNA glycosylase (EC 3.2.2.23)	DNA Repair Base Excision		PEG385	889	1170	910	1889		1170	773.166	1003.1	971.333	109.261	-0.59704	1086.3	122.194	-0.221419		L	K10563
PEG386	fig|6666666.88372.peg.386	peg.386	CDS	LMR001-002	312688	313461	774	Enoyl-CoA hydratase [branched-chain amino acid degradation] (EC 4.2.1.17)	Dehydrogenase complexes		PEG386	774	6868	5635	7425		6868	4827.24	5385.64	5848.96	755.68	-0.509255	6128.16	791.752	-0.351336		I	K01692
PEG387	fig|6666666.88372.peg.387	peg.387	CDS	LMR001-002	313669	313935	267	SSU ribosomal protein S20p	Ribosome SSU bacterial		PEG387	267	10460	32758	22159		10460	23235.1	17751.2	16853.2	6312.06	1.14987	14111.2	5285.11	0.761476		J	K02968
PEG388	fig|6666666.88372.peg.388	peg.388	CDS	LMR001-002	314839	316380	1542	Chromosomal replication initiator protein DnaA	Cell Division Subsystem including YidCD, DNA replication cluster 1		PEG388	1542	38799	34970	36961		38799	24564.6	30929.7	31689.8	2055.11	-0.660034	34872.3	2261.5	-0.327625		L	K02313
PEG389	fig|6666666.88372.peg.389	peg.389	CDS	LMR001-002	316591	316965	375	RNA polymerase sigma-70 factor, ECF subfamily	CBSS-316057.3.peg.1308		PEG389	375	1494	1405	2083		1494	1226.85	1123.5	1359.82	362.62	-0.283051	1308.15	348.839	-0.410021		S
PEG390	fig|6666666.88372.peg.390	peg.390	CDS	LMR001-002	316962	318236	1275	RNA polymerase sigma-70 factor, ECF subfamily	CBSS-316057.3.peg.1308		PEG390	1275	1924	2004	3521		1924	1733.75	2230.51	1828.42	143.405	-0.149534	2076.8	162.886	0.213948		K	K03088
PEG391	fig|6666666.88372.peg.391	peg.391	CDS	LMR001-002	318311	318793	483	Probable glutathione S-transferase-related transmembrane protein (EC 2.5.1.18)	- none -		PEG391	481	347	277	859		347	221.759	317.336	284.248	59.0952	-0.644848	332.036	69.0305	-0.12783		S
PEG392	fig|6666666.88372.peg.392	peg.392	CDS	LMR001-002	318808	319674	867	Glyoxalase family protein	- none -		PEG392	867	784	667	2357		784	549.111	1333.03	666.271	76.8478	-0.512705	1058.23	122.057	0.766835		S	K04750
PEG393	fig|6666666.88372.peg.393	peg.393	CDS	LMR001-002	320875	319688	1188	Radical SAM family enzyme, similar to coproporphyrinogen III oxidase, oxygen-independent, clustered with nucleoside-triphosphatase RdgB	CBSS-630.2.peg.3360, Heat shock dnaK gene cluster extended, Heme and Siroheme Biosynthesis, Queuosine-Archaeosine Biosynthesis		PEG393	1188	2128	3110	4235		2128	2766.82	2801.94	2447.48	206.017	0.378635	2465.04	207.495	0.396834		H	K02495
PEG394	fig|6666666.88372.peg.394	peg.394	CDS	LMR001-002	321527	320883	645	Nucleoside 5-triphosphatase RdgB (dHAPTP, dITP, XTP-specific) (EC 3.6.1.15)	Heat shock dnaK gene cluster extended, Housecleaning nucleoside triphosphate pyrophosphatases		PEG394	645	2628	4410	4033		2628	3762.82	2636.27	3196.54	495.588	0.516603	2633.27	408.259	0.00328758		F	K02428
PEG395	fig|6666666.88372.peg.395	peg.395	CDS	LMR001-002	321969	321553	417	Glyoxalase family protein	- none -		PEG395	417	2084	3798	3078		2084	3313.69	1891.52	2699.09	647.264	0.668744	1988.01	476.74	-0.140146		E
PEG396	fig|6666666.88372.peg.396	peg.396	CDS	LMR001-002	322734	322015	720	Ribonuclease PH (EC 2.7.7.56)	Heat shock dnaK gene cluster extended, tRNA processing		PEG396	720	7241	12255	10345		7241	10098.1	7960.67	8671.23	1204.34	0.479154	7602.52	1055.91	0.136032		J	K00989
PEG397	fig|6666666.88372.peg.397	peg.397	CDS	LMR001-002	322905	323984	1080	Heat-inducible transcription repressor HrcA	GroEL GroES, Heat shock dnaK gene cluster extended		PEG397	1080	3148	2977	4863		3148	2622.58	3328.06	2885.16	267.145	-0.263334	3237.9	299.806	0.0803614		K	K03705
PEG398	fig|6666666.88372.peg.398	peg.398	CDS	LMR001-002	324233	324859	627	Heat shock protein GrpE	GroEL GroES, Heat shock dnaK gene cluster extended, Protein chaperones		PEG398	627	5509	11099	7239		5509	9303.44	5236.03	7405.76	1181.14	0.756215	5372.05	856.787	-0.0730747		O	K03687
PEG399	fig|6666666.88372.peg.399	peg.399	CDS	LMR001-002	326468	325233	1236	FAD/FMN-containing dehydrogenases	- none -		PEG399	1236	4576	2403	6001		4576	2098.46	4233.27	3334.67	269.796	-1.12314	4402.07	356.155	-0.110702		C
PEG400	fig|6666666.88372.peg.400	peg.400	CDS	LMR001-002	327248	326481	768	3-oxoacyl-[acyl-carrier protein] reductase (EC 1.1.1.100)	CBSS-246196.1.peg.364, Fatty Acid Biosynthesis FASII		PEG400	768	3596	2700	4360		3596	2341.1	2905.06	2969.29	386.627	-0.619808	3251.28	423.343	-0.308423		IQR
PEG401	fig|6666666.88372.peg.401	peg.401	CDS	LMR001-002	327400	327543	144	hypothetical protein	- none -		PEG401	144	432	636	578		432	524.14	219.122	477.83	331.826	0.280529	325.32	225.917	-0.977692
PEG402	fig|6666666.88372.peg.402	peg.402	CDS	LMR001-002	328012	327548	465	PTS system nitrogen-specific IIA component, PtsN	- none -		PEG402	465	5988	6584	6612		5988	5668.53	4714.71	5826.32	1252.97	-0.0781635	5349.41	1150.41	-0.343969		GT	K02806
PEG403	fig|6666666.88372.peg.403	peg.403	CDS	LMR001-002	328753	328187	567	Ribosomal subunit interface protein	Ribosome activity modulation		PEG403	567	21406	22580	26779		21406	17066.5	21844.5	19247.7	3394.65	-0.328394	21636.7	3816	0.0277107		J
PEG404	fig|6666666.88372.peg.404	peg.404	CDS	LMR001-002	328967	328815	153	hypothetical protein	- none -		PEG404	144	32	88	109		32	63.4151	31.3769	47.702	33.1264	0.987252	31.6829	22.002	-0.0278725
PEG405	fig|6666666.88372.peg.405	peg.405	CDS	LMR001-002	330672	329113	1560	RNA polymerase sigma-54 factor RpoN	CBSS-316057.3.peg.1308, Flagellar motility, Flagellum, Transcription initiation, bacterial sigma factors		PEG405	1560	2830	3992	4202		2830	3458.52	2768.54	3144.96	201.6	0.288643	2799.96	179.485	-0.0323873		K	K03092
PEG406	fig|6666666.88372.peg.406	peg.406	CDS	LMR001-002	331723	330911	813	Lipopolysaccharide ABC transporter, ATP-binding protein LptB	- none -		PEG406	813	5681	4738	6632		5681	4042.43	4740.11	4858.94	597.655	-0.489512	5207.78	640.563	-0.259812		R	K06861
PEG407	fig|6666666.88372.peg.407	peg.407	CDS	LMR001-002	332304	331738	567	FIG01074166: hypothetical protein	- none -		PEG407	567	11207	9800	11698		11207	8282.57	9073.75	9738.47	1717.54	-0.434624	10134.1	1787.31	-0.303003		S	K09774
PEG408	fig|6666666.88372.peg.408	peg.408	CDS	LMR001-002	332990	332322	669	hypothetical protein	- none -		PEG408	669	5894	5202	7845		5894	4424.64	5736.42	5156.54	770.783	-0.412326	5812.43	868.824	-0.0377333		S	K11719
PEG409	fig|6666666.88372.peg.409	peg.409	CDS	LMR001-002	333269	334279	1011	macromolecule metabolism; macromolecule degradation; degradation of proteins, peptides, glycopeptides	CBSS-316057.3.peg.1308		PEG409	1011	4178	4004	4990		4178	3465.46	3420.76	3821.88	378.03	-0.269872	3799.53	375.819	-0.288602		OU	K04773
PEG410	fig|6666666.88372.peg.410	peg.410	CDS	LMR001-002	334390	334698	309	Integration host factor beta subunit	DNA structural proteins, bacterial		PEG410	309	8177	10484	8397		8177	8846.35	6211.28	8515.5	2755.83	0.112162	7197.96	2329.44	-0.39803		L	K05788
PEG411	fig|6666666.88372.peg.411	peg.411	CDS	LMR001-002	334725	334859	135	hypothetical protein	- none -		PEG411	135	1106	1400	1190		1106	1222.31	479.58	1164.47	862.568	0.143444	793.102	587.483	-1.20632
PEG412	fig|6666666.88372.peg.412	peg.412	CDS	LMR001-002	334882	335226	345	Permeases of the major facilitator superfamily	- none -		PEG412	345	2855	3362	3244		2855	2983.25	2030.7	2920.42	846.498	0.0620833	2444.15	708.448	-0.492821
PEG413	fig|6666666.88372.peg.413	peg.413	CDS	LMR001-002	335778	335236	543	carbon monoxide dehydrogenase G protein	- none -		PEG413	542	2465	2096	3112		2465	1825.3	1923.09	2145.67	395.88	-0.434064	2194.56	404.901	-0.358772		S	K09386
PEG414	fig|6666666.88372.peg.414	peg.414	CDS	LMR001-002	336081	335962	120	hypothetical protein	- none -		PEG414	120	154	357	290		154	301.074	106.063	227.622	189.685	0.965595	130.117	108.43	-0.5396
PEG415	fig|6666666.88372.peg.415	peg.415	CDS	LMR001-002	336098	337036	939	SAM dependent methyltransferase	- none -		PEG415	939	1532	2959	3222		1532	2599.89	2013.42	2065.49	219.967	0.763894	1772.25	188.738	0.39509		R	K06969
PEG416	fig|6666666.88372.peg.416	peg.416	CDS	LMR001-002	337033	337890	858	macromolecule metabolism; macromolecule synthesis, modification; rna synthesis, modification , dna transcription	CBSS-316057.3.peg.1308, CBSS-316057.3.peg.1308, CBSS-316057.3.peg.1308		PEG416	858	1326	2712	2675		1326	2352.57	1546.93	1839.98	214.45	0.825638	1437.16	167.502	0.220814		J	K03437
PEG417	fig|6666666.88372.peg.417	peg.417	CDS	LMR001-002	337890	338390	501	Lipoprotein signal peptidase (EC 3.4.23.36)	Lipoprotein Biosynthesis, Signal peptidase		PEG417	500	632	1406	1391		632	1226.85	613.361	929.633	185.927	0.956028	622.886	124.577	-0.0441287		MU	K03101
PEG418	fig|6666666.88372.peg.418	peg.418	CDS	LMR001-002	338438	340723	2286	FIG00985229: hypothetical protein	- none -		PEG418	2275	1938	1475	4573		1938	1279.53	3091.26	1607.97	70.6802	-0.597784	2513.84	110.498	0.674801		T
PEG419	fig|6666666.88372.peg.419	peg.419	CDS	LMR001-002	340933	341823	891	Putative hemolysin	- none -		PEG419	891	1371	1869	2947		1371	1611.26	1772.42	1491.07	167.348	0.233088	1571.65	176.392	0.370614		R
PEG420	fig|6666666.88372.peg.420	peg.420	CDS	LMR001-002	344667	342382	2286	NADP-dependent malic enzyme (EC 1.1.1.40)	Pyruvate metabolism I: anaplerotic reactions, PEP		PEG420	2286	18993	20768	24683		18993	15871.2	19959.8	17441	762.948	-0.260406	19485.3	852.375	0.0702802		C	K00029
PEG421	fig|6666666.88372.peg.421	peg.421	CDS	LMR001-002	344770	347520	2751	DNA mismatch repair protein MutS	DNA repair, bacterial MutL-MutS system, DNA repair system including RecA, MutS and a hypothetical protein		PEG421	2751	4556	5782	7496		4556	4966.74	5441.56	4763.55	173.157	0.123149	5000.96	181.787	0.254869		L	K03555
PEG422	fig|6666666.88372.peg.422	peg.422	CDS	LMR001-002	347672	350521	2850	[Protein-PII] uridylyltransferase (EC 2.7.7.59)	Ammonia assimilation, CBSS-312309.3.peg.1965		PEG422	2850	8323	10742	15175		8323	9038.68	11836.3	8678.16	304.497	0.119938	10077	353.577	0.508969		O	K00990
PEG423	fig|6666666.88372.peg.423	peg.423	CDS	LMR001-002	350518	352125	1608	Proposed peptidoglycan lipid II flippase MurJ	Peptidoglycan lipid II flippase		PEG423	1608	1864	2465	4143		1864	2150.02	2720	2006.06	124.755	0.207433	2291.04	142.478	0.546686		R	K03980
PEG424	fig|6666666.88372.peg.424	peg.424	CDS	LMR001-002	352122	352511	390	Glyoxalase family protein	- none -		PEG424	390	272	378	702		272	323.097	267.184	297.684	76.3292	0.24693	269.727	69.1608	-0.0272055		E
PEG425	fig|6666666.88372.peg.425	peg.425	CDS	LMR001-002	352603	353667	1065	Tryptophanyl-tRNA synthetase (EC 6.1.1.2)	tRNA aminoacylation, Trp		PEG425	1064	3026	8831	6174		3026	7457.56	4372.16	5242.24	492.692	1.30086	3699.54	347.701	0.530499		J	K01867
PEG426	fig|6666666.88372.peg.426	peg.426	CDS	LMR001-002	353781	354272	492	Universal stress protein UspA and related nucleotide-binding proteins	- none -		PEG426	492	3213	2814	5016		3213	2446.37	3437.91	2830.01	575.206	-0.393578	3325.79	675.973	0.0973151		T
PEG427	fig|6666666.88372.peg.427	peg.427	CDS	LMR001-002	354378	354944	567	NifU-like protein	- none -		PEG427	567	10657	8550	11497		10657	7218.39	8928.16	8942.17	1577.1	-0.563265	9797.06	1727.88	-0.256579		O
PEG428	fig|6666666.88372.peg.428	peg.428	CDS	LMR001-002	355113	355817	705	TsaB protein, required for threonylcarbamoyladenosine (t(6)A) formation in tRNA	Bacterial RNA-metabolizing Zn-dependent hydrolases, Conserved gene cluster associated with Met-tRNA formyltransferase, Possible RNA modification and stress response cluster, Ribosome biogenesis bacterial, YgjD and YeaZ, YjeE		PEG428	705	3546	2842	4231		3546	2478.73	2793.52	3013.43	427.437	-0.51746	3170.83	449.763	-0.344975		O	K14742
PEG429	fig|6666666.88372.peg.429	peg.429	CDS	LMR001-002	355895	356392	498	Ribosomal-protein-S18p-alanine acetyltransferase (EC 2.3.1.-)	Bacterial RNA-metabolizing Zn-dependent hydrolases, Conserved gene cluster associated with Met-tRNA formyltransferase, Possible RNA modification and stress response cluster, Ribosome biogenesis bacterial		PEG429	498	1601	1231	2136		1601	1109.28	1160.43	1354.42	271.972	-0.528048	1379.99	277.107	-0.463015		R	K03789
PEG430	fig|6666666.88372.peg.430	peg.430	CDS	LMR001-002	356459	357313	855	1-acyl-sn-glycerol-3-phosphate acyltransferase (EC 2.3.1.51)	Glycerolipid and Glycerophospholipid Metabolism in Bacteria, Ribosome post-transcriptional modification and chromosomal segregation cluster		PEG430	855	1376	1104	2285		1376	1003.46	1282.18	1190.33	139.22	-0.456764	1329.69	155.52	-0.10315		I	K00655
PEG431	fig|6666666.88372.peg.431	peg.431	CDS	LMR001-002	357410	358837	1428	tRNA-i(6)A37 methylthiotransferase	Methylthiotransferases, tRNA-methylthiotransferase containing cluster, tRNA modification Bacteria, tRNA processing		PEG431	1428	4004	11195	7668		4004	9378.6	5585.54	6689.02	468.419	1.22957	4792.49	335.609	0.481896		J	K06168
PEG432	fig|6666666.88372.peg.432	peg.432	CDS	LMR001-002	358834	359889	1056	Phosphate starvation-inducible protein PhoH, predicted ATPase	CBSS-56780.10.peg.1536, CBSS-56780.10.peg.1536, Glycyl-tRNA synthetase containing cluster, Inteins, Phosphate metabolism, Phosphate metabolism, tRNA-methylthiotransferase containing cluster, tRNA-methylthiotransferase containing cluster		PEG432	1056	16192	12133	16822		16192	10022.8	13212.3	13101.8	1240.7	-0.691	14696.5	1391.72	-0.292406		T	K06217
PEG433	fig|6666666.88372.peg.433	peg.433	CDS	LMR001-002	359918	360415	498	Metal-dependent hydrolase YbeY, involved in rRNA and/or ribosome maturation and assembly	CBSS-56780.10.peg.1536, Glycyl-tRNA synthetase containing cluster, tRNA-methylthiotransferase containing cluster		PEG433	498	3457	2790	4101		3457	2427.49	2688.54	2943.44	591.053	-0.511054	3073.97	617.262	-0.363698		R	K07042
PEG434	fig|6666666.88372.peg.434	peg.434	CDS	LMR001-002	360428	361561	1134	Magnesium and cobalt efflux protein CorC	CBSS-56780.10.peg.1536, Copper homeostasis: copper tolerance, Glycyl-tRNA synthetase containing cluster, Magnesium transport, tRNA-methylthiotransferase containing cluster		PEG434	1134	5269	7689	7718		5269	6523.09	5629.38	5897.69	520.079	0.307123	5450.84	480.674	0.0945445		R
PEG435	fig|6666666.88372.peg.435	peg.435	CDS	LMR001-002	362208	361630	579	Mll7752 protein	CBSS-176299.4.peg.1292		PEG435	579	7798	7474	9138		7798	6363.63	6895.78	7080.97	1222.96	-0.29331	7347.04	1268.92	-0.177446		S
PEG436	fig|6666666.88372.peg.436	peg.436	CDS	LMR001-002	362623	364218	1596	Apolipoprotein N-acyltransferase (EC 2.3.1.-) / Copper homeostasis protein CutE	Copper homeostasis: copper tolerance, Lipoprotein Biosynthesis, tRNA-methylthiotransferase containing cluster, tRNA-methylthiotransferase containing cluster		PEG436	1593	5715	5170	7218		5715	4393.53	5209.23	5054.16	317.273	-0.37932	5462.01	342.875	-0.133631		M	K03820
PEG437	fig|6666666.88372.peg.437	peg.437	CDS	LMR001-002	364356	364769	414	Transcriptional regulator, Cro/CI family	- none -		PEG437	414	2450	4397	3464		2450	3754.5	2190.52	3101.78	749.223	0.616392	2319.79	560.336	-0.160957		K
PEG438	fig|6666666.88372.peg.438	peg.438	CDS	LMR001-002	365128	366408	1281	S-adenosylmethionine synthetase (EC 2.5.1.6)	Methionine Biosynthesis, Methionine Degradation		PEG438	1281	2020	66094	3697		2020	41481.2	2363.58	21749.8	1697.88	4.3612	2190.97	171.036	0.227783		H	K00789
PEG439	fig|6666666.88372.peg.439	peg.439	CDS	LMR001-002	366577	367275	699	tRNA (guanine46-N7-)-methyltransferase (EC 2.1.1.33)	RNA methylation, tRNA modification Bacteria		PEG439	699	4856	7915	5684		4856	6691.54	3991.19	5772.21	825.781	0.463495	4422.04	632.623	-0.282024		R	K03439
PEG440	fig|6666666.88372.peg.440	peg.440	CDS	LMR001-002	367663	367406	258	FIG00983952: hypothetical protein	- none -		PEG440	258	11650	11349	16303		11650	9489.88	12764	10565.6	4095.18	-0.294785	12202.6	4729.71	0.132837		S
PEG441	fig|6666666.88372.peg.441	peg.441	CDS	LMR001-002	368106	367714	393	Small heat shock protein	- none -		PEG441	393	8224	4429	9195		8224	3779.15	6951.17	6000.79	1526.92	-1.1215	7586.8	1930.48	-0.242308		O
PEG442	fig|6666666.88372.peg.442	peg.442	CDS	LMR001-002	368218	368349	132	hypothetical protein	- none -		PEG442	128	12	25	73		12	17.8321	18.997	14.9135	11.6512	0.572044	15.496	12.1062	0.663337
PEG443	fig|6666666.88372.peg.443	peg.443	CDS	LMR001-002	368351	369295	945	Inosine-uridine preferring nucleoside hydrolase (EC 3.2.2.1)	Purine conversions, Queuosine-Archaeosine Biosynthesis		PEG443	945	7695	6817	8592		7695	5862.71	6391.57	6777	717.143	-0.391662	7041.44	745.125	-0.267059		F	K01239
PEG444	fig|6666666.88372.peg.444	peg.444	CDS	LMR001-002	371772	369397	2376	Methyl-accepting chemotaxis protein	- none -		PEG444	2376	10932	3168	6608		10932	2823.01	4714.71	6881.29	289.616	-1.95425	7827.14	329.425	-1.21431		NT	K03406
PEG445	fig|6666666.88372.peg.445	peg.445	CDS	LMR001-002	371851	371979	129	hypothetical protein	- none -		PEG445	127	83	31	311		83	21.9529	114.426	52.469	41.3142	-1.91844	98.7056	77.721	0.463494
PEG446	fig|6666666.88372.peg.446	peg.446	CDS	LMR001-002	373086	372214	873	Ribokinase (EC 2.7.1.15)	D-ribose utilization, Deoxyribose and Deoxynucleoside Catabolism		PEG446	873	8950	6372	11056		8950	5497.28	8564.27	7225.46	827.659	-0.703758	8758.96	1003.32	-0.0641459		G	K00852
PEG447	fig|6666666.88372.peg.447	peg.447	CDS	LMR001-002	374360	373164	1197	DNA recombination protein RmuC	DNA repair, bacterial		PEG447	1177	2412	3996	4612		2412	3465.46	3127.59	2937.68	249.591	0.524069	2768.75	235.237	0.376073		S	K09760
PEG448	fig|6666666.88372.peg.448	peg.448	CDS	LMR001-002	374448	375008	561	Peptide deformylase (EC 3.5.1.88)	Bacterial RNA-metabolizing Zn-dependent hydrolases, Conserved gene cluster associated with Met-tRNA formyltransferase, Translation termination factors bacterial		PEG448	556	3764	4702	4958		3764	4005.91	3395.31	3886.47	699.006	0.088698	3581.17	644.096	-0.149887		J	K01462
PEG449	fig|6666666.88372.peg.449	peg.449	CDS	LMR001-002	375073	376008	936	Methionyl-tRNA formyltransferase (EC 2.1.2.9)	Conserved gene cluster associated with Met-tRNA formyltransferase, Translation initiation factors bacterial		PEG449	936	1468	1969	3112		1468	1697.02	1923.09	1582.97	169.121	0.208244	1696.01	181.197	0.388662		J	K00604
PEG450	fig|6666666.88372.peg.450	peg.450	CDS	LMR001-002	376008	376751	744	tRNA pseudouridine synthase A (EC 4.2.1.70)	Colicin V and Bacteriocin Production Cluster, RNA pseudouridine syntheses, tRNA modification Bacteria, tRNA processing		PEG450	743	838	1178	1926		838	1074.74	1028.13	956.135	128.686	0.359778	932.827	125.549	0.295804		J	K06173
PEG451	fig|6666666.88372.peg.451	peg.451	CDS	LMR001-002	377415	376819	597	FIG00983692: hypothetical protein	- none -		PEG451	597	462	593	1418		462	489.581	632.748	475.981	79.7288	0.0824656	547.565	91.7194	0.45255
PEG452	fig|6666666.88372.peg.452	peg.452	CDS	LMR001-002	378661	377402	1260	N-succinyl-L,L-diaminopimelate desuccinylase (EC 3.5.1.18)	A Glutathione-dependent Thiol Reductase Associated with a Step in Lysine Biosynthesis, Arginine Biosynthesis -- gjo, Arginine Biosynthesis extended, Lysine Biosynthesis DAP Pathway, Lysine Biosynthesis DAP Pathway, GJO scratch		PEG452	1260	2490	3175	4527		2490	2829.85	3055.33	2659.35	211.06	0.185241	2772.09	220.007	0.295845		E	K01439
PEG453	fig|6666666.88372.peg.453	peg.453	CDS	LMR001-002	381954	378769	3186	RND multidrug efflux transporter; Acriflavin resistance protein	Multidrug Resistance Efflux Pumps		PEG453	3186	31478	4471	22449		31478	3812.52	17978.2	17645	553.829	-3.0455	24727.8	776.14	-0.808073		V	K03296
PEG454	fig|6666666.88372.peg.454	peg.454	CDS	LMR001-002	382330	382085	246	RND efflux system, membrane fusion protein CmeA	Multidrug Resistance Efflux Pumps		PEG454	246	1919	349	1500		1919	292.609	686.054	1105.64	449.447	-2.71306	1302.36	529.415	-1.48371		M
PEG455	fig|6666666.88372.peg.455	peg.455	CDS	LMR001-002	383288	382341	948	RND efflux system, membrane fusion protein CmeA	Multidrug Resistance Efflux Pumps		PEG455	948	11410	2216	8741		11410	1940.82	6540.24	6671.66	703.761	-2.55461	8971.37	946.347	-0.801934		M
PEG456	fig|6666666.88372.peg.456	peg.456	CDS	LMR001-002	384150	383341	810	Esterase/lipase	- none -		PEG456	810	6506	2803	6766		6506	2439.76	4842.99	4470.53	551.917	-1.41399	5672.15	700.265	-0.424828		I	K01567
PEG457	fig|6666666.88372.peg.457	peg.457	CDS	LMR001-002	384288	385232	945	Transcriptional regulator, LysR family	CBSS-349102.4.peg.3442		PEG457	945	2112	1327	3457		2112	1170.99	2184.9	1642.24	173.782	-0.851901	2149.2	227.428	0.0479421		K
PEG458	fig|6666666.88372.peg.458	peg.458	CDS	LMR001-002	387192	385294	1899	FIG003033: Helicase domain protein	- none -		PEG458	1899	1205	4918	3945		1205	4189.18	2563	2697.11	142.028	1.79759	1884.02	99.2111	1.08876		LKJ	K05592
PEG459	fig|6666666.88372.peg.459	peg.459	CDS	LMR001-002	387736	387347	390	protein of unknown function DUF805	- none -		PEG459	390	2072	2765	2839		2072	2403.88	1679.71	2237.01	573.593	0.215637	1874.93	480.75	-0.301518		S
PEG460	fig|6666666.88372.peg.460	peg.460	CDS	LMR001-002	388590	387733	858	2,3,4,5-tetrahydropyridine-2,6-dicarboxylate N-succinyltransferase (EC 2.3.1.117)	Lysine Biosynthesis DAP Pathway, Lysine Biosynthesis DAP Pathway, GJO scratch		PEG460	858	10012	12113	12888		10012	10005.1	10008.7	10014.1	1167.14	-0.00257964	10015.9	1167.35	-0.00206588		E	K00674
PEG461	fig|6666666.88372.peg.461	peg.461	CDS	LMR001-002	388832	389803	972	Decarboxylase family protein	- none -		PEG461	972	1812	3619	4684		1812	3178.14	3189.75	2494.74	256.661	0.811127	2500.54	257.258	0.816385		R	K06966
PEG462	fig|6666666.88372.peg.462	peg.462	CDS	LMR001-002	390532	389819	714	Pyridoxal-5'-phosphate phosphatase (EC 3.1.3.74), Alphaproteobacterial type	Pyridoxin(Vitamin B6) Degradation Pathway		PEG462	710	1970	3699	4263		1970	3235.25	2827.39	2601.57	366.418	0.717232	2397.64	337.696	0.522825		R	K07025
PEG463	fig|6666666.88372.peg.463	peg.463	CDS	LMR001-002	390625	391539	915	FIG01074816: hypothetical protein	- none -		PEG463	915	479	1309	1775		479	1157.91	921.824	818.272	89.4286	1.27454	700.227	76.5275	0.94558
PEG464	fig|6666666.88372.peg.464	peg.464	CDS	LMR001-002	391596	392684	1089	ADA regulatory protein / Methylated-DNA--protein-cysteine methyltransferase (EC 2.1.1.63)	CBSS-393124.3.peg.2657, CBSS-393124.3.peg.2657, DNA repair, bacterial, DNA repair, bacterial		PEG464	1076	1095	1820	2679		1095	1569.89	1552.36	1331.93	123.785	0.521113	1323.16	122.97	0.50491		FL	K10778
PEG465	fig|6666666.88372.peg.465	peg.465	CDS	LMR001-002	392770	393546	777	Probable carboxyvinyl-carboxyphosphonate phosphorylmutase (EC 2.7.8.23)	CBSS-393124.3.peg.2657		PEG465	777	5177	3764	5907		5177	3287.39	4159.43	4231.73	544.624	-0.654912	4667.75	600.74	-0.31547		G
PEG466	fig|6666666.88372.peg.466	peg.466	CDS	LMR001-002	394618	393731	888	Acetylglutamate kinase (EC 2.7.2.8)	Arginine Biosynthesis -- gjo, Arginine Biosynthesis extended		PEG466	888	6304	8699	8766		6304	7338.15	6558.93	6823.86	768.453	0.217873	6434.25	724.578	0.0559173		E	K00930
PEG467	fig|6666666.88372.peg.467	peg.467	CDS	LMR001-002	394739	394873	135	hypothetical protein	- none -		PEG467	135	14	20	152		14	14.5165	48.7081	14.2562	10.5601	0.0526939	31.352	23.2237	1.79916
PEG468	fig|6666666.88372.peg.468	peg.468	CDS	LMR001-002	394896	395603	708	FIG111991: hypothetical protein	CBSS-313593.3.peg.2729		PEG468	708	2060	3146	3511		2060	2802.97	2218.91	2431.8	343.475	0.443873	2139.77	302.228	0.106769		S
PEG469	fig|6666666.88372.peg.469	peg.469	CDS	LMR001-002	396194	395649	546	FIG01075580: hypothetical protein	- none -		PEG469	546	2586	7796	4655		2586	6606.09	3162.93	4597.15	841.969	1.35184	2875.57	526.662	0.289306		S
PEG470	fig|6666666.88372.peg.470	peg.470	CDS	LMR001-002	397048	396395	654	GTP-binding protein EngB	Universal GTPases		PEG470	653	1007	2372	2407		1007	2069.63	1365.37	1538.28	235.572	1.03941	1186.15	181.646	0.439323		R	K03978
PEG471	fig|6666666.88372.peg.471	peg.471	CDS	LMR001-002	398990	397206	1785	Inner membrane protein translocase component YidC, long form	CTP synthase (EC 6.3.4.2) cluster, Cell Division Subsystem including YidCD, RNA modification cluster		PEG471	1785	15976	32028	21994		15976	22837.9	17571.1	19398.4	1086.74	0.517081	16764.9	939.213	0.138854		U	K03217
PEG472	fig|6666666.88372.peg.472	peg.472	CDS	LMR001-002	399133	398990	144	Ribonuclease P protein component (EC 3.1.26.5)	Cell Division Subsystem including YidCD, RNA modification cluster, tRNA processing		PEG472	144	993	2471	1227		993	2154.72	502.901	1573.92	1093	1.11746	748.008	519.45	-0.981689			K03536
PEG473	fig|6666666.88372.peg.473	peg.473	CDS	LMR001-002	399119	399283	165	hypothetical protein	- none -		PEG473	168	527	1201	764		527	1092.34	284.153	809.784	482.014	1.05091	405.691	241.483	-0.891763
PEG474	fig|6666666.88372.peg.474	peg.474	CDS	LMR001-002	399543	399409	135	LSU ribosomal protein L34p	Cell Division Subsystem including YidCD, RNA modification cluster, Ribosome LSU bacterial		PEG474	135	3927	16102	7204		3927	12739.4	5209.23	8332.92	6172.54	1.698	4567.84	3383.58	0.407844
PEG475	fig|6666666.88372.peg.475	peg.475	CDS	LMR001-002	400067	402058	1992	Methyl-accepting chemotaxis protein	- none -		PEG475	1992	2820	1426	4456		2820	1240.8	2993.4	2029.59	101.887	-1.1836	2905.89	145.878	0.0869172		NT	K03406
PEG476	fig|6666666.88372.peg.476	peg.476	CDS	LMR001-002	402440	403237	798	COG0398: uncharacterized membrane protein	- none -		PEG476	775	235	262	1319		235	210.639	564.624	222.801	28.7486	-0.157661	399.794	51.5863	1.26485		S
PEG477	fig|6666666.88372.peg.477	peg.477	CDS	LMR001-002	403258	404679	1422	Mercuric ion reductase (EC 1.16.1.1)	Mercuric reductase, Mercury resistance operon		PEG477	1413	1033	797	2393		1033	665.967	1358.39	849.364	60.1107	-0.632985	1195.58	84.6126	0.395393		C	K00520
PEG478	fig|6666666.88372.peg.478	peg.478	CDS	LMR001-002	404703	406184	1482	Sensor histidine kinase in cluster with mercury reductase	- none -		PEG478	1482	1897	2159	3324		1897	1887.29	2091.84	1892	127.665	-0.00717707	1994.27	134.566	0.141274		T
PEG479	fig|6666666.88372.peg.479	peg.479	CDS	LMR001-002	406908	406447	462	Methyltransferase (EC 2.1.1.-)	- none -		PEG479	461	471	1396	1040		471	1220.05	402.292	845.513	183.409	1.37321	436.635	94.7147	-0.227415
PEG480	fig|6666666.88372.peg.480	peg.480	CDS	LMR001-002	406963	407187	225	hypothetical protein	- none -		PEG480	225	151	279	287		151	223.705	105.008	187.356	83.2695	0.566971	128.008	56.8925	-0.524125
PEG481	fig|6666666.88372.peg.481	peg.481	CDS	LMR001-002	407375	407232	144	hypothetical protein	- none -		PEG481	144	115	219	297		115	174.373	108.993	144.727	100.505	0.599542	112.036	77.8031	-0.0784047
PEG482	fig|6666666.88372.peg.482	peg.482	CDS	LMR001-002	407590	408456	867	putative hydrolase protein	- none -		PEG482	867	1045	1631	1881		1045	1414.97	997.451	1229.84	141.85	0.43765	1021.09	117.772	-0.0667994		R
PEG483	fig|6666666.88372.peg.483	peg.483	CDS	LMR001-002	409214	408783	432	Lactoylglutathione lyase (EC 4.4.1.5)	Glutathione: Non-redox reactions, Methylglyoxal Metabolism		PEG483	432	1611	1605	2168		1611	1391.73	1183.2	1501.19	347.498	-0.210756	1396.92	323.362	-0.444947		R	K07032
PEG484	fig|6666666.88372.peg.484	peg.484	CDS	LMR001-002	409444	410004	561	FMN reductase (EC 1.5.1.29)	Alkanesulfonate assimilation, Alkanesulfonates Utilization		PEG484	561	609	460	1319		609	388.865	564.624	499.201	88.9841	-0.648445	587.08	104.649	-0.110424		R	K00299
PEG485	fig|6666666.88372.peg.485	peg.485	CDS	LMR001-002	410054	411424	1371	Nitrilotriacetate monooxygenase component A (EC 1.14.13.-)	- none -		PEG485	1364	486	633	1789		486	521.689	934.947	504.048	36.9537	0.101025	710.677	52.1024	0.94272		C	K00492
PEG486	fig|6666666.88372.peg.486	peg.486	CDS	LMR001-002	411434	412285	852	Alkanesulfonates transport system permease protein	Alkanesulfonate assimilation, Alkanesulfonates Utilization		PEG486	852	226	273	1141		226	218.983	450.75	222.463	26.1107	-0.0451431	338.347	39.7121	0.996366		P	K15554
PEG487	fig|6666666.88372.peg.487	peg.487	CDS	LMR001-002	412314	413297	984	probable aliphatic sulphonate ABC transporter, substrate-binding protein	- none -		PEG487	984	482	647	1384		482	533.105	608.988	507.527	51.5779	0.145544	545.468	55.4337	0.337538		P
PEG488	fig|6666666.88372.peg.488	peg.488	CDS	LMR001-002	413307	414077	771	Alkanesulfonates ABC transporter ATP-binding protein / Sulfonate ABC transporter, ATP-binding subunit SsuB	Alkanesulfonate assimilation, Alkanesulfonates Utilization		PEG488	771	1003	829	2013		1003	693.274	1080.82	847.79	109.96	-0.531824	1041.56	135.092	0.108803		P	K15555
PEG489	fig|6666666.88372.peg.489	peg.489	CDS	LMR001-002	415170	414055	1116	Melibiose operon regulatory protein	Melibiose Utilization		PEG489	1116	2266	1417	4000		2266	1233.76	2606.77	1749.2	156.739	-0.876224	2435.71	218.253	0.202978		K
PEG490	fig|6666666.88372.peg.490	peg.490	CDS	LMR001-002	415261	417264	2004	putative oxidoreductase	- none -		PEG490	2004	2510	1614	3922		2510	1401.72	2548.15	1956.8	97.6448	-0.841574	2530.02	126.248	0.020678		RC
PEG491	fig|6666666.88372.peg.491	peg.491	CDS	LMR001-002	417249	417371	123	hypothetical protein	- none -		PEG491	123	40	17	53		40	12.5347	12.7032	26.2646	21.3533	-1.67387	26.3488	21.4218	-1.65461
PEG492	fig|6666666.88372.peg.492	peg.492	CDS	LMR001-002	417775	418263	489	(U62541) immunoreactive 14 kDa protein BA14k	- none -		PEG492	489	325	318	936		325	259.212	354.058	292.15	59.7443	-0.326695	339.573	69.4423	0.123159
PEG493	fig|6666666.88372.peg.493	peg.493	CDS	LMR001-002	419020	418550	471	Uncharacterized protein Mlr1045	- none -		PEG493	471	1694	1147	2133		1694	1048.95	1156.88	1371.64	291.219	-0.691777	1425.61	302.677	-0.550481		S
PEG494	fig|6666666.88372.peg.494	peg.494	CDS	LMR001-002	419820	419143	678	hypothetical protein	- none -		PEG494	677	196	495	1120		196	416.458	439.425	306.171	45.2247	1.08817	317.655	46.9209	1.16561		O
PEG495	fig|6666666.88372.peg.495	peg.495	CDS	LMR001-002	419987	420127	141	hypothetical protein	- none -		PEG495	141	57	55	353		57	38.8302	130.136	47.9233	33.9882	-0.554197	93.5762	66.3661	1.19057
PEG496	fig|6666666.88372.peg.496	peg.496	CDS	LMR001-002	420684	420253	432	NTP pyrophosphohydrolases including oxidative damage repair enzymes	CBSS-216591.1.peg.168		PEG496	432	445	424	817		445	363.928	300.896	404.28	93.5833	-0.288955	372.764	86.2879	-0.563345		S
PEG497	fig|6666666.88372.peg.497	peg.497	CDS	LMR001-002	421790	420735	1056	Aldo-keto reductase	- none -		PEG497	1056	1359	914	3156		1359	778.095	1960.4	1068.2	101.156	-0.803798	1659.36	157.136	0.52933		C
PEG498	fig|6666666.88372.peg.498	peg.498	CDS	LMR001-002	422387	421803	585	FIG000605: protein co-occurring with transport systems (COG1739)	Transport system clustering with HemG		PEG498	585	261	101	1076		261	72.8426	417.69	167.029	28.552	-1.84239	339.453	58.0262	0.67719		S
PEG499	fig|6666666.88372.peg.499	peg.499	CDS	LMR001-002	426246	422545	3702	Proline dehydrogenase (EC 1.5.99.8) (Proline oxidase) / Delta-1-pyrroline-5-carboxylate dehydrogenase (EC 1.5.1.12)	Proline, 4-hydroxyproline uptake and utilization, Respiratory dehydrogenases 1		PEG499	3702	22948	6509	44391		22948	5619.16	37591.7	14290.3	386.016	-2.03079	30276.6	817.844	0.711198		CE	K13821
PEG500	fig|6666666.88372.peg.500	peg.500	CDS	LMR001-002	426749	426435	315	Ferredoxin	Inorganic Sulfur Assimilation, Soluble cytochromes and functionally related electron carriers		PEG500	315	225	400	656		225	345.183	251.129	285.044	90.4903	0.618044	238.017	75.5611	0.159112		R	K06940
PEG501	fig|6666666.88372.peg.501	peg.501	CDS	LMR001-002	427594	426788	807	3',5'-cyclic-nucleotide phosphodiesterase (EC 3.1.4.17)	cAMP signaling in bacteria		PEG501	806	299	243	1147		299	195.864	455.114	247.545	30.7128	-0.611384	377.17	46.7953	0.60499		R
PEG502	fig|6666666.88372.peg.502	peg.502	CDS	LMR001-002	427873	427739	135	hypothetical protein	- none -		PEG502	135	35	27	67		35	19.1817	17.0307	27.0881	20.0653	-0.8674	26.0126	19.2686	-1.03899
PEG503	fig|6666666.88372.peg.503	peg.503	CDS	LMR001-002	427877	428911	1035	Not a Proline racemase, nor 4-hydroxyproline epimerase [missing catalytic residues]	Proline, 4-hydroxyproline uptake and utilization		PEG503	1035	3500	3241	4988		3500	2888.85	3420.76	3194.15	308.614	-0.276633	3460.1	334.31	-0.0328136		E
PEG504	fig|6666666.88372.peg.504	peg.504	CDS	LMR001-002	429520	428954	567	Chromosome (plasmid) partitioning protein ParB	Bacterial Cytoskeleton, Cell Division Subsystem including YidCD, Plasmid replication, RNA modification and chromosome partitioning cluster		PEG504	567	1636	1589	4294		1636	1378.44	2853.2	1507.63	265.896	-0.247857	2245.01	395.945	0.801689
PEG505	fig|6666666.88372.peg.505	peg.505	CDS	LMR001-002	429719	430336	618	FIG01074187: hypothetical protein	- none -		PEG505	618	2820	2109	5462		2820	1839.95	3800.81	2329.17	376.888	-0.6152	3309.6	535.533	0.431439		S
PEG506	fig|6666666.88372.peg.506	peg.506	CDS	LMR001-002	432247	430376	1872	Adenylate cyclase (EC 4.6.1.1)	cAMP signaling in bacteria		PEG506	1872	1681	1048	3554		1681	937.989	2254.22	1310.33	69.9963	-0.843114	1968.45	105.152	0.421871		T	K01768
PEG507	fig|6666666.88372.peg.507	peg.507	CDS	LMR001-002	432957	432253	705	FIG01074319: hypothetical protein	- none -		PEG507	705	3867	2031	4779		3867	1761.74	3259.74	2812.71	398.965	-1.13297	3561.7	505.206	-0.245217		T
PEG508	fig|6666666.88372.peg.508	peg.508	CDS	LMR001-002	433202	433639	438	Mll8168 protein	- none -		PEG508	438	5961	3138	9883		5961	2795.86	7551.08	4376.24	999.142	-1.0912	6753.85	1541.97	0.342188		S	K15977
PEG509	fig|6666666.88372.peg.509	peg.509	CDS	LMR001-002	434138	433710	429	Fucose operon fucU protein	- none -		PEG509	429	2591	3798	3625		2591	3313.69	2304.02	2950.95	687.868	0.356483	2446.12	570.191	-0.167802		G	K02431
PEG510	fig|6666666.88372.peg.510	peg.510	CDS	LMR001-002	435370	434138	1233	Transcriptional regulator FrcR for fructose utilization, ROK family	Fructose utilization		PEG510	1233	967	1752	2741		967	1516.94	1600.02	1241.49	100.689	0.650989	1283.04	104.058	0.727919		KG
PEG511	fig|6666666.88372.peg.511	peg.511	CDS	LMR001-002	435683	436768	1086	Fructose ABC transporter, substrate-binding component FrcB	Fructose utilization		PEG511	1086	158016	116252	113924		158016	65835.8	102593	111980	10311.3	-1.26412	130359	12003.6	-0.624138		G	K10552
PEG512	fig|6666666.88372.peg.512	peg.512	CDS	LMR001-002	437063	438148	1086	Fructose ABC transporter, permease component FrcC	Fructose utilization		PEG512	1086	22084	32965	23981		22084	23368.4	19359.1	22724.2	2092.47	0.0818171	20719.6	1907.88	-0.189732		G	K10553
PEG513	fig|6666666.88372.peg.513	peg.513	CDS	LMR001-002	438124	438930	807	Fructose ABC transporter, ATP-binding component FrcA	Fructose utilization		PEG513	807	19629	24316	19368		19629	18138.4	15329.7	18886	2340.28	-0.114275	17481.7	2166.25	-0.356995		G	K10554
PEG514	fig|6666666.88372.peg.514	peg.514	CDS	LMR001-002	438927	439547	621	Fructokinase (EC 2.7.1.4)	Fructose utilization, Mannitol Utilization		PEG514	621	6718	9827	7701		6718	8301.02	5614.72	7507.65	1208.96	0.306053	6164.5	992.674	-0.258021		H
PEG515	fig|6666666.88372.peg.515	peg.515	CDS	LMR001-002	439756	440799	1044	Dihydroorotase (EC 3.5.2.3)	De Novo Pyrimidine Synthesis, Zinc regulated enzymes		PEG515	1044	2433	3878	3828		2433	3374.71	2468.37	2903.46	278.109	0.472501	2450.28	234.702	0.021292		F	K01465
PEG516	fig|6666666.88372.peg.516	peg.516	CDS	LMR001-002	440870	441568	699	Orotate phosphoribosyltransferase (EC 2.4.2.10)	De Novo Pyrimidine Synthesis		PEG516	699	4044	4860	4476		4044	4142.75	3011.22	4094.25	585.73	0.0341776	3528.49	504.791	-0.42606		F	K00762
PEG517	fig|6666666.88372.peg.517	peg.517	CDS	LMR001-002	441674	442600	927	Fructokinase (EC 2.7.1.4)	Fructose utilization, Mannitol Utilization		PEG517	927	5671	6445	6235		5671	5557.04	4416.36	5616.24	605.852	-0.0304169	5045.91	544.326	-0.361875		G	K00847
PEG518	fig|6666666.88372.peg.518	peg.518	CDS	LMR001-002	444281	442656	1626	Glucose-6-phosphate isomerase (EC 5.3.1.9)	Glycolysis and Gluconeogenesis		PEG518	1626	9981	9257	16853		9981	7818.25	13243.8	8897.62	547.209	-0.351761	11610.4	714.047	0.40864		G	K01810
PEG519	fig|6666666.88372.peg.519	peg.519	CDS	LMR001-002	446138	444438	1701	Long-chain-fatty-acid--CoA ligase (EC 6.2.1.3)	Biotin biosynthesis, Fatty acid metabolism cluster		PEG519	1701	4866	4430	7793		4866	3779.15	5690.55	4321.61	254.063	-0.364105	5277.31	310.248	0.226404		IQ	K01897
PEG520	fig|6666666.88372.peg.520	peg.520	CDS	LMR001-002	447500	447640	141	cell processes; transport of small molecules	- none -		PEG520	141	175	294	276		175	235.558	100.602	205.271	145.582	0.428852	137.793	97.7258	-0.798567
PEG521	fig|6666666.88372.peg.521	peg.521	CDS	LMR001-002	448110	449819	1710	Potassium-transporting ATPase A chain (EC 3.6.3.12) (TC 3.A.3.7.1)	Potassium homeostasis		PEG521	1696	244	566	1895		244	467.774	1008.72	355.777	20.9774	0.940225	626.251	36.9252	2.04887		P	K01546
PEG522	fig|6666666.88372.peg.522	peg.522	CDS	LMR001-002	449831	451873	2043	Potassium-transporting ATPase B chain (EC 3.6.3.12) (TC 3.A.3.7.1)	Potassium homeostasis		PEG522	2038	368	947	3085		368	816.576	1897.85	592.353	29.0654	1.14938	1132.99	55.5933	2.36609		P	K01547
PEG523	fig|6666666.88372.peg.523	peg.523	CDS	LMR001-002	451876	452463	588	Potassium-transporting ATPase C chain (EC 3.6.3.12) (TC 3.A.3.7.1)	Potassium homeostasis		PEG523	586	185	247	849		185	199.196	313.246	192.061	32.775	0.107234	249.086	42.5062	0.760341		P	K01548
PEG524	fig|6666666.88372.peg.524	peg.524	CDS	LMR001-002	452464	455160	2697	Osmosensitive K+ channel histidine kinase KdpD (EC 2.7.3.-)	Potassium homeostasis		PEG524	2697	1376	1323	4866		1376	1168.78	3328.06	1272.99	47.2004	-0.236746	2352.63	87.2315	1.27293		T	K07646
PEG525	fig|6666666.88372.peg.525	peg.525	CDS	LMR001-002	455157	455849	693	sensor histidine kinase	- none -		PEG525	693	239	227	1044		239	181.682	404.254	210.231	30.3364	-0.394275	321.517	46.395	0.759572		TK	K07667
PEG526	fig|6666666.88372.peg.526	peg.526	CDS	LMR001-002	455936	456601	666	CDP-diacylglycerol--glycerol-3-phosphate 3-phosphatidyltransferase (EC 2.7.8.5)	Glycerolipid and Glycerophospholipid Metabolism in Bacteria		PEG526	660	656	485	1283		656	408.168	540.656	532.157	80.6298	-0.684852	598.401	90.6668	-0.279304		I
PEG527	fig|6666666.88372.peg.527	peg.527	CDS	LMR001-002	456598	457209	612	1-acyl-sn-glycerol-3-phosphate acyltransferase (EC 2.3.1.51)	Glycerolipid and Glycerophospholipid Metabolism in Bacteria, Ribosome post-transcriptional modification and chromosomal segregation cluster		PEG527	611	396	238	1530		396	191.648	709.684	293.963	48.1118	-1.04806	552.981	90.5042	0.840663		I
PEG528	fig|6666666.88372.peg.528	peg.528	CDS	LMR001-002	457217	458158	942	Phosphatidate cytidylyltransferase (EC 2.7.7.41)	Glycerolipid and Glycerophospholipid Metabolism in Bacteria		PEG528	938	690	404	1636		690	348.325	798.39	519.282	55.3606	-0.986665	744.315	79.3513	0.209996		R	K00981
PEG529	fig|6666666.88372.peg.529	peg.529	CDS	LMR001-002	458377	460221	1845	Signal transduction histidine kinase	- none -		PEG529	1845	902	855	2583		902	714.589	1480.77	808.08	43.7984	-0.335328	1191.17	64.562	0.71583		T
PEG530	fig|6666666.88372.peg.530	peg.530	CDS	LMR001-002	460218	460862	645	FIG01074524: hypothetical protein	- none -		PEG530	645	346	346	738		346	289.258	277.508	317.598	49.2401	-0.258165	311.724	48.3292	-0.31799		TK
PEG531	fig|6666666.88372.peg.531	peg.531	CDS	LMR001-002	462383	461052	1332	FIG01075489: hypothetical protein	- none -		PEG531	1332	2373	3854	4043		2373	3353.57	2643.43	2862.47	214.9	0.499973	2507.4	188.243	0.156686
PEG532	fig|6666666.88372.peg.532	peg.532	CDS	LMR001-002	462783	463214	432	FIG01076556: hypothetical protein	- none -		PEG532	432	154	200	493		154	156.804	184.883	155.487	35.9924	0.0244427	169.527	39.2422	0.26209
PEG533	fig|6666666.88372.peg.533	peg.533	CDS	LMR001-002	463258	463407	150	hypothetical protein	- none -		PEG533	150	38	49	132		38	34.5503	40.3204	36.2846	24.1898	-0.138019	39.1697	26.1131	0.0847908
PEG534	fig|6666666.88372.peg.534	peg.534	CDS	LMR001-002	463420	465252	1833	Nodulation protein nolO (EC 2.1.3.-)	- none -		PEG534	1831	1063	1426	2570		1063	1240.8	1472.46	1152.47	62.9422	0.221578	1268.3	69.2683	0.468539		O	K00612
PEG535	fig|6666666.88372.peg.535	peg.535	CDS	LMR001-002	467380	466370	1011	Dioxygenases related to 2-nitropropane dioxygenase	- none -		PEG535	1011	962	1401	1833		962	1222.31	965.337	1091.96	108.008	0.346082	963.475	95.2992	0.00557737		R	K00459
PEG536	fig|6666666.88372.peg.536	peg.536	CDS	LMR001-002	467617	468816	1200	Possible regulatory protein BirS	- none -		PEG536	1200	5933	7999	8250		5933	6764.16	6073.16	6346.71	528.892	0.19006	6001.21	500.101	0.0345973
PEG537	fig|6666666.88372.peg.537	peg.537	CDS	LMR001-002	469734	468832	903	UDP-galactose-lipid carrier transferase (EC 2.-.-.-)	- none -		PEG537	903	9717	7056	11105		9717	6046.34	8606.84	7886.91	873.412	-0.686002	9167.16	1015.19	-0.176581		S
PEG538	fig|6666666.88372.peg.538	peg.538	CDS	LMR001-002	469908	471218	1311	Phosphate regulon sensor protein PhoR (SphS) (EC 2.7.13.3)	High affinity phosphate transporter and control of PHO regulon, PhoR-PhoB two-component regulatory system, Phosphate metabolism		PEG538	1311	1481	1489	2895		1481	1290.88	1730.45	1386.7	105.774	-0.199697	1606.49	122.539	0.223101		T	K07636
PEG539	fig|6666666.88372.peg.539	peg.539	CDS	LMR001-002	471408	472442	1035	Phosphate ABC transporter, periplasmic phosphate-binding protein PstS (TC 3.A.1.7.1)	High affinity phosphate transporter and control of PHO regulon, PhoR-PhoB two-component regulatory system, Phosphate metabolism		PEG539	1035	8508	34412	10421		8508	24235.8	8024.14	16373.6	1581.99	1.50968	8267.76	798.818	-0.0850459		P	K02040
PEG540	fig|6666666.88372.peg.540	peg.540	CDS	LMR001-002	472540	474024	1485	Phosphate transport system permease protein PstC (TC 3.A.1.7.1)	High affinity phosphate transporter and control of PHO regulon, Phosphate metabolism		PEG540	1484	1560	4589	2987		1560	3916.19	1809.72	2737.87	184.493	1.32832	1684.64	113.52	0.214634		P	K02037
PEG541	fig|6666666.88372.peg.541	peg.541	CDS	LMR001-002	474021	475343	1323	Phosphate transport system permease protein PstA (TC 3.A.1.7.1)	High affinity phosphate transporter and control of PHO regulon, Phosphate metabolism		PEG541	1321	1738	4011	3004		1738	3472.39	1828.63	2605.09	197.206	0.998665	1783.21	134.99	0.073498		P	K02038
PEG542	fig|6666666.88372.peg.542	peg.542	CDS	LMR001-002	475357	476172	816	Phosphate transport ATP-binding protein PstB (TC 3.A.1.7.1)	High affinity phosphate transporter and control of PHO regulon, Phosphate metabolism		PEG542	816	3112	5694	4132		3112	4878.68	2712.12	3995.2	489.607	0.648779	2911.92	356.853	-0.198288		P	K02036
PEG543	fig|6666666.88372.peg.543	peg.543	CDS	LMR001-002	476239	476934	696	Phosphate transport system regulatory protein PhoU	High affinity phosphate transporter and control of PHO regulon, Phosphate metabolism		PEG543	696	2090	3307	3108		2090	2936.42	1916.8	2512.86	361.043	0.491043	2003.05	287.794	-0.12432		P	K02039
PEG544	fig|6666666.88372.peg.544	peg.544	CDS	LMR001-002	477150	477833	684	Phosphate regulon transcriptional regulatory protein PhoB (SphR)	High affinity phosphate transporter and control of PHO regulon, PhoR-PhoB two-component regulatory system, Phosphate metabolism		PEG544	684	1601	4142	2658		1601	3567.92	1538.25	2583.74	377.74	1.15741	1568.9	229.372	-0.0563867		TK	K07657
PEG545	fig|6666666.88372.peg.545	peg.545	CDS	LMR001-002	478449	477931	519	GcrA cell cycle regulator	- none -		PEG545	519	8467	9867	10906		8467	8338	8440.85	8405.14	1619.49	-0.0230475	8456.56	1629.4	-0.00536069		S	K13583
PEG546	fig|6666666.88372.peg.546	peg.546	CDS	LMR001-002	478860	480059	1200	Acetylornithine aminotransferase (EC 2.6.1.11)	Arginine Biosynthesis -- gjo, Arginine Biosynthesis extended		PEG546	1200	11709	16454	15948		11709	12981.4	12488.7	12351.7	1029.31	0.147234	12105.3	1008.78	0.0914115		E	K00821
PEG547	fig|6666666.88372.peg.547	peg.547	CDS	LMR001-002	480132	481043	912	Ornithine carbamoyltransferase (EC 2.1.3.3)	Arginine Biosynthesis -- gjo, Arginine Biosynthesis extended, Arginine Deiminase Pathway, Arginine and Ornithine Degradation		PEG547	912	6936	11101	9955		6936	9303.44	7611.44	8118.85	890.224	0.424022	7272.85	797.461	0.134428		E
PEG548	fig|6666666.88372.peg.548	peg.548	CDS	LMR001-002	481482	482477	996	Chaperone protein Hsp33	- none -		PEG548	996	5599	9066	7255		5599	7655.22	5249.48	6626.4	665.301	0.451641	5423.53	544.531	-0.0926285		O	K04083
PEG549	fig|6666666.88372.peg.549	peg.549	CDS	LMR001-002	482959	482567	393	ApaG protein	Possible RNA modification and stress response cluster		PEG549	393	1487	2556	2878		1487	2225.61	1713.13	1855.77	472.206	0.582827	1599.53	407.005	0.205259		P	K06195
PEG550	fig|6666666.88372.peg.550	peg.550	CDS	LMR001-002	483071	483685	615	Putative phosphatidylglycerophosphate synthase	- none -		PEG550	615	233	365	1021		233	309.082	394.859	270.946	44.0562	0.408842	313.834	51.0299	0.762189		I
PEG551	fig|6666666.88372.peg.551	peg.551	CDS	LMR001-002	484924	483740	1185	O-acetylhomoserine sulfhydrylase (EC 2.5.1.49) / O-succinylhomoserine sulfhydrylase (EC 2.5.1.48)	Methionine Biosynthesis, Methionine Biosynthesis		PEG551	1185	2608	3503	3980		2608	3085.83	2592.25	2845.99	240.168	0.243734	2599.2	219.342	-0.00771673		E	K10764
PEG552	fig|6666666.88372.peg.552	peg.552	CDS	LMR001-002	485121	486218	1098	Deoxycytidine triphosphate deaminase (EC 3.5.4.13)	pyrimidine conversions		PEG552	1097	4472	7365	6675		4472	6273.44	4765.67	5375.29	489.999	0.486681	4621.4	421.276	0.0901036		F	K01494
PEG553	fig|6666666.88372.peg.553	peg.553	CDS	LMR001-002	486590	487441	852	ABC transporter, periplasmic amino acid-binding protein	- none -		PEG553	852	1640	1350	2738		1640	1186.55	1595.82	1413.57	165.912	-0.467445	1618.2	189.93	-0.0399188		ET	K02030
PEG554	fig|6666666.88372.peg.554	peg.554	CDS	LMR001-002	488334	487522	813	Possible sterol desaturase	- none -		PEG554	813	344	389	1361		344	335.052	593.68	339.701	41.7836	-0.0394917	469.015	57.6894	0.78581		I
PEG555	fig|6666666.88372.peg.555	peg.555	CDS	LMR001-002	488888	488478	411	FIG00450271: hypothetical protein	- none -		PEG555	411	896	724	1324		896	602.13	568.623	748.748	182.177	-0.5724	731.994	178.101	-0.655002
PEG556	fig|6666666.88372.peg.556	peg.556	CDS	LMR001-002	489779	488937	843	SUCCINOGLYCAN BIOSYNTHESIS PROTEIN EXOI	- none -		PEG556	843	736	956	1789		736	827.023	934.947	781.615	92.7183	0.167816	835.577	99.1195	0.344773		L
PEG557	fig|6666666.88372.peg.557	peg.557	CDS	LMR001-002	490457	489792	666	Phage repressor	- none -		PEG557	666	784	1268	1815		784	1130.78	953.112	957.107	143.71	0.529448	868.271	130.371	0.282842		K
PEG558	fig|6666666.88372.peg.558	peg.558	CDS	LMR001-002	491146	490631	516	Transcriptional regulator, HxlR family	- none -		PEG558	516	652	1408	1356		652	1229.14	589.363	940.386	182.245	0.915532	620.496	120.251	-0.144894		K
PEG559	fig|6666666.88372.peg.559	peg.559	CDS	LMR001-002	491352	491798	447	FIG01075399: hypothetical protein	- none -		PEG559	446	133	195	482		133	152.115	180.357	142.58	31.9686	0.193242	156.701	35.1348	0.438935		S
PEG560	fig|6666666.88372.peg.560	peg.560	CDS	LMR001-002	492128	491919	210	hypothetical protein	- none -		PEG560	208	36	70	260		36	50.1672	94.1268	43.0711	20.7072	0.479752	65.0509	31.2745	1.38761
PEG561	fig|6666666.88372.peg.561	peg.561	CDS	LMR001-002	494463	492250	2214	Enoyl-CoA hydratase [isoleucine degradation] (EC 4.2.1.17) / 3-hydroxyacyl-CoA dehydrogenase (EC 1.1.1.35) / 3-hydroxybutyryl-CoA epimerase (EC 5.1.2.3)	Acetyl-CoA fermentation to Butyrate, Acetyl-CoA fermentation to Butyrate, Butyrate metabolism cluster, Fatty acid metabolism cluster, Fatty acid metabolism cluster, Isoleucine degradation, Isoleucine degradation, Polyhydroxybutyrate metabolism, Polyhydroxybutyrate metabolism, Valine degradation		PEG561	2214	16743	13956	16630		16743	11266.9	13051.1	14008.1	632.707	-0.572027	14900.2	673.001	-0.359946		I	K01782
PEG562	fig|6666666.88372.peg.562	peg.562	CDS	LMR001-002	495693	494485	1209	3-ketoacyl-CoA thiolase (EC 2.3.1.16) @ Acetyl-CoA acetyltransferase (EC 2.3.1.9)	Acetyl-CoA fermentation to Butyrate, Biotin biosynthesis, Butanol Biosynthesis, Butyrate metabolism cluster, CBSS-246196.1.peg.364, Fatty acid metabolism cluster, Isoleucine degradation, Isoprenoid Biosynthesis, Polyhydroxybutyrate metabolism, Polyhydroxybutyrate metabolism, Serine-glyoxylate cycle, Serine-glyoxylate cycle		PEG562	1209	7216	5745	7346		7216	4928.88	5317.06	6069.98	502.066	-0.548954	6264.07	518.12	-0.439586		I	K00626
PEG563	fig|6666666.88372.peg.563	peg.563	CDS	LMR001-002	497642	495801	1842	Acyl-CoA dehydrogenase (EC 1.3.8.7)	- none -		PEG563	1842	5454	6245	8045		5454	5395.93	5909.01	5426.75	294.612	-0.0163892	5683.29	308.539	0.114655		I	K00257
PEG564	fig|6666666.88372.peg.564	peg.564	CDS	LMR001-002	497880	501731	3852	TPR repeat, SEL1 subfamily	- none -		PEG564	3852	29498	21788	35510		29498	16542.3	29577.8	23027.2	597.798	-0.835151	29545	767.003	0.00320988		RLM	K13582
PEG565	fig|6666666.88372.peg.565	peg.565	CDS	LMR001-002	502045	502971	927	membrane protein, putative	- none -		PEG565	927	1062	2001	2636		1062	1728.43	1519.9	1395.06	150.492	0.703092	1290.8	139.244	0.517602		R	K07090
PEG566	fig|6666666.88372.peg.566	peg.566	CDS	LMR001-002	502971	503771	801	putative transmembrane protein	- none -		PEG566	799	1020	1317	1858		1020	1164.39	983.109	1092.66	136.754	0.189677	1002.02	125.41	-0.0544744
PEG567	fig|6666666.88372.peg.567	peg.567	CDS	LMR001-002	503946	504182	237	Transcriptional regulator, AsnC family	- none -		PEG567	237	1829	2007	2279		1829	1739.03	1277.97	1783.57	752.56	-0.0720591	1553.04	655.289	-0.51649		K
PEG568	fig|6666666.88372.peg.568	peg.568	CDS	LMR001-002	504972	504247	726	FIG006285: ICC-like protein phosphoesterase	- none -		PEG568	726	1213	1546	1983		1213	1339.17	1061.26	1276.28	175.796	0.142297	1137.32	156.656	-0.193269		R	K06953
PEG569	fig|6666666.88372.peg.569	peg.569	CDS	LMR001-002	507599	505053	2547	FIG003033: Helicase domain protein	- none -		PEG569	2536	1357	1959	4062		1357	1688.69	2658.32	1523.5	60.075	0.31409	2008.32	79.1924	0.9687		R	K03724
PEG570	fig|6666666.88372.peg.570	peg.570	CDS	LMR001-002	507715	508221	507	Predicted transcriptional regulator of 4-carboxymuconolactone decarboxylase, Rrf2 family	Rrf2 family transcriptional regulators		PEG570	507	228	429	951		228	367.237	362.111	297.635	58.7052	0.687459	295.073	58.1997	0.667183		K
PEG571	fig|6666666.88372.peg.571	peg.571	CDS	LMR001-002	508243	508704	462	4-carboxymuconolactone decarboxylase domain/alkylhydroperoxidase AhpD family core domain protein	- none -		PEG571	462	1166	1239	1610		1166	1114.06	774.926	1140.43	246.847	-0.0667451	970.868	210.145	-0.590438		S
PEG572	fig|6666666.88372.peg.572	peg.572	CDS	LMR001-002	509332	508757	576	Transporter	- none -		PEG572	576	2123	1144	4463		2123	1043.43	3002.31	1583.34	274.885	-1.02494	2562.78	444.926	0.499801		S
PEG573	fig|6666666.88372.peg.573	peg.573	CDS	LMR001-002	510438	509500	939	hypothetical protein	- none -		PEG573	939	1900	3478	3622		1900	3067.65	2304.02	2484.36	264.575	0.690314	2102.55	223.914	0.277337		R
PEG574	fig|6666666.88372.peg.574	peg.574	CDS	LMR001-002	510446	510565	120	hypothetical protein	- none -		PEG574	120	519	1143	778		519	1043.43	288.224	781.114	650.928	1.00808	403.512	336.26	-0.84799
PEG575	fig|6666666.88372.peg.575	peg.575	CDS	LMR001-002	510629	510871	243	FIG00450046: hypothetical protein	- none -		PEG575	243	1580	2560	2472		1580	2225.61	1407.63	1903.43	783.303	0.493135	1494.44	614.996	-0.167794
PEG576	fig|6666666.88372.peg.576	peg.576	CDS	LMR001-002	510875	511378	504	FIG00985384: hypothetical protein	- none -		PEG576	504	1629	2782	2534		1629	2415.54	1448.53	2022.42	401.273	0.568094	1538.91	305.34	-0.169657		S
PEG577	fig|6666666.88372.peg.577	peg.577	CDS	LMR001-002	511428	512795	1368	DNA-damage-inducible protein F	- none -		PEG577	1368	2330	2083	4378		2330	1815.48	2922.61	2071.79	151.446	-0.358795	2625.35	191.912	0.328108		V	K03327
PEG578	fig|6666666.88372.peg.578	peg.578	CDS	LMR001-002	513859	512771	1089	Dihydroorotate dehydrogenase (EC 1.3.3.1)	De Novo Pyrimidine Synthesis, Hypothetical Related to Dihydroorotate dehydrogenase		PEG578	1089	1669	3672	3663		1669	3216.1	2336.69	2441.67	224.212	0.947844	2001.97	183.835	0.486997		F	K00254
PEG579	fig|6666666.88372.peg.579	peg.579	CDS	LMR001-002	514203	513856	348	FIG005495: hypothetical protein	Hypothetical Related to Dihydroorotate dehydrogenase		PEG579	348	615	1519	1405		615	1317.4	624.2	966.288	277.669	1.09862	619.688	178.071	0.0210072		S
PEG580	fig|6666666.88372.peg.580	peg.580	CDS	LMR001-002	514321	514758	438	FIG00450254: hypothetical protein	- none -		PEG580	438	725	921	1206		725	785.592	488.11	755.014	172.378	0.116922	606.273	138.418	-0.569653
PEG581	fig|6666666.88372.peg.581	peg.581	CDS	LMR001-002	515041	515688	648	Transcriptional regulator, LuxR family	- none -		PEG581	648	2831	2735	3951		2831	2375.91	2570.24	2603.65	401.798	-0.253031	2700.82	416.793	-0.139608		TK
PEG582	fig|6666666.88372.peg.582	peg.582	CDS	LMR001-002	519244	515738	3507	Na+/proline symporter / Sensor histidine kinase PrlS	- none -		PEG582	3507	3795	2249	12115		3795	1966.3	9399.37	2879.72	82.1136	-0.947913	6596.26	188.088	1.30917		ERTK
PEG583	fig|6666666.88372.peg.583	peg.583	CDS	LMR001-002	519495	519926	432	Large-conductance mechanosensitive channel	Potassium homeostasis		PEG583	432	3389	3570	3945		3389	3140.88	2563	3264.66	755.708	-0.109454	2975.72	688.824	-0.402788		M	K03282
PEG584	fig|6666666.88372.peg.584	peg.584	CDS	LMR001-002	520061	521227	1167	Aspartate aminotransferase (EC 2.6.1.1)	CBSS-216591.1.peg.168, Glutamine, Glutamate, Aspartate and Asparagine Biosynthesis, Threonine and Homoserine Biosynthesis		PEG584	1167	6505	3500	7672		6505	3085.83	5585.54	4793.56	410.759	-1.07507	6043.42	517.859	-0.21903		E
PEG585	fig|6666666.88372.peg.585	peg.585	CDS	LMR001-002	521430	521269	162	hypothetical protein	- none -		PEG585	163	231	175	353		231	133.461	130.136	182.334	111.861	-0.792766	180.671	110.841	-0.829162
PEG586	fig|6666666.88372.peg.586	peg.586	CDS	LMR001-002	521386	522414	1029	UDP-glucose 4-epimerase (EC 5.1.3.2)	CBSS-296591.1.peg.2330, N-linked Glycosylation in Bacteria, Rhamnose containing glycans		PEG586	1028	1144	929	2043		1144	796.041	1097.9	969.46	94.3054	-0.521757	1120.39	108.987	-0.0579216		M	K01784
PEG587	fig|6666666.88372.peg.587	peg.587	CDS	LMR001-002	522712	522437	276	Isochorismate pyruvate-lyase (EC 4.-.-.-)	Chorismate: Intermediate for synthesis of Tryptophan, PAPA antibiotics, PABA, 3-hydroxyanthranilate and more.		PEG587	274	263	589	666		263	486.171	254.506	374.599	136.715	0.886254	258.766	94.4402	-0.0475127		E	K04782
PEG588	fig|6666666.88372.peg.588	peg.588	CDS	LMR001-002	523333	523217	117	hypothetical protein	- none -		PEG588	117	150	65	327		150	46.3092	120.577	98.1388	83.8793	-1.69529	135.273	115.618	-0.314702
PEG589	fig|6666666.88372.peg.589	peg.589	CDS	LMR001-002	524334	523330	1005	putative Cytochrome bd2, subunit II	Terminal cytochrome d ubiquinol oxidases, Terminal cytochrome oxidases		PEG589	1005	4255	1333	7518		4255	1175.42	5455.58	2715.7	270.219	-1.85631	4855.78	483.162	0.358239		C	K00426
PEG590	fig|6666666.88372.peg.590	peg.590	CDS	LMR001-002	525739	524324	1416	putative Cytochrome bd2, subunit I	Terminal cytochrome d ubiquinol oxidases, Terminal cytochrome oxidases		PEG590	1416	12235	2465	16750		12235	2150.02	13147.7	7198.09	508.34	-2.5099	12696.9	896.676	0.102482		C	K00425
PEG591	fig|6666666.88372.peg.591	peg.591	CDS	LMR001-002	527448	526279	1170	N-acetyl-L,L-diaminopimelate deacetylase (EC 3.5.1.47)	Lysine Biosynthesis DAP Pathway, Lysine Biosynthesis DAP Pathway, GJO scratch		PEG591	1170	731	659	1637		731	542.514	798.39	636.826	54.4296	-0.430486	764.765	65.3645	0.126948		R	K01451
PEG592	fig|6666666.88372.peg.592	peg.592	CDS	LMR001-002	528274	527450	825	ABC transporter, permease protein	- none -		PEG592	822	207	272	999		207	218.505	386.651	212.759	25.8831	0.0779354	296.833	36.111	0.901303		E	K02029
PEG593	fig|6666666.88372.peg.593	peg.593	CDS	LMR001-002	528996	528271	726	Histidine ABC transporter, permease protein HisQ (TC 3.A.1.3.1)	Arginine and Ornithine Degradation		PEG593	726	374	349	1044		374	292.609	404.254	333.36	45.9173	-0.354492	389.182	53.6063	0.111796		E	K02029
PEG594	fig|6666666.88372.peg.594	peg.594	CDS	LMR001-002	529891	529109	783	Nucleoside ABC transporter, permease protein 1	- none -		PEG594	783	2721	2097	3362		2721	1830.19	2119.03	2276.45	290.734	-0.573042	2420.86	309.178	-0.361636		ET	K02030
PEG595	fig|6666666.88372.peg.595	peg.595	CDS	LMR001-002	530701	529928	774	Arginine/ornithine ABC transporter, ATP-binding protein AotP	Arginine and Ornithine Degradation		PEG595	774	1738	1943	3241		1738	1672.47	2030.7	1705.13	220.301	-0.0552859	1884.25	243.443	0.224716		E	K02028
PEG596	fig|6666666.88372.peg.596	peg.596	CDS	LMR001-002	530974	531588	615	Transcriptional regulator, TetR family	- none -		PEG596	615	1685	1890	2633		1685	1626.11	1515.41	1656.33	269.322	-0.0526499	1600.98	260.322	-0.154373		K
PEG597	fig|6666666.88372.peg.597	peg.597	CDS	LMR001-002	531605	532795	1191	Aspartate aminotransferase (EC 2.6.1.1)	CBSS-216591.1.peg.168, Glutamine, Glutamate, Aspartate and Asparagine Biosynthesis, Threonine and Homoserine Biosynthesis		PEG597	1191	3642	3473	5465		3642	3067.65	3811.46	3353.4	281.562	-0.24647	3725.3	312.788	0.0667417		E	K12252
PEG598	fig|6666666.88372.peg.598	peg.598	CDS	LMR001-002	532792	534405	1614	Acetolactate synthase large subunit (EC 2.2.1.6)	Acetoin, butanediol metabolism, Acetolactate synthase subunits, Branched-Chain Amino Acid Biosynthesis		PEG598	1614	3016	3176	5961		3016	2829.85	4201.6	2921.43	181.005	-0.0904788	3607.3	223.501	0.479736		EH	K01652
PEG599	fig|6666666.88372.peg.599	peg.599	CDS	LMR001-002	534580	534999	420	FIG01075448: hypothetical protein	- none -		PEG599	420	3925	7554	5290		3925	6416.33	3655.1	5171.39	1231.28	0.708523	3790.77	902.565	-0.103315
PEG600	fig|6666666.88372.peg.600	peg.600	CDS	LMR001-002	535096	537630	2535	Protein-export membrane protein SecD (TC 3.A.5.1.1) / Protein-export membrane protein SecF (TC 3.A.5.1.1)	CBSS-211586.1.peg.2832, CBSS-211586.1.peg.2832, CBSS-783.1.peg.807, CBSS-783.1.peg.807		PEG600	2535	21022	26906	24378		21022	19711.1	19707.5	20374.4	803.726	-0.0939737	20372.6	803.654	-0.0942407		U	K12257
PEG601	fig|6666666.88372.peg.601	peg.601	CDS	LMR001-002	537886	538062	177	hypothetical protein	- none -		PEG601	177	6965	5934	10200		6965	5106.31	7836.52	6036.29	3410.33	-0.448105	7401.39	4181.58	0.169828
PEG602	fig|6666666.88372.peg.602	peg.602	CDS	LMR001-002	538141	538356	216	conserved hypothetical protein	- none -		PEG602	216	7051	3431	9693		7051	3031.77	7371.55	5039.35	2333.03	-1.21684	7209.24	3337.61	0.0649731
PEG603	fig|6666666.88372.peg.603	peg.603	CDS	LMR001-002	538659	539114	456	Rrf2 family transcriptional regulator	Flagellar motility, Rrf2 family transcriptional regulators		PEG603	456	3630	3325	4912		3630	2954.51	3362.09	3292.65	722.071	-0.297361	3496.43	766.762	-0.110923		K
PEG604	fig|6666666.88372.peg.604	peg.604	CDS	LMR001-002	539345	540358	1014	Arabinose 5-phosphate isomerase (EC 5.3.1.13)	- none -		PEG604	1014	5529	8761	7766		5529	7406.06	5660.11	6469.78	638.045	0.420513	5596.8	551.953	0.032637		MR	K06041
PEG605	fig|6666666.88372.peg.605	peg.605	CDS	LMR001-002	541659	540328	1332	Capsular polysaccharide export system protein KpsS	Capsular Polysaccharides Biosynthesis and Assembly		PEG605	1332	1681	2677	3580		1681	2325.74	2272.53	2004.21	150.466	0.466936	1977.6	148.469	0.433547		M	K07265
PEG606	fig|6666666.88372.peg.606	peg.606	CDS	LMR001-002	543304	541685	1620	FIG01076147: hypothetical protein	- none -		PEG606	1620	3701	5096	6609		3701	4333.27	4714.71	4015.78	247.888	0.228602	4206.5	259.66	0.350314		M
PEG607	fig|6666666.88372.peg.607	peg.607	CDS	LMR001-002	544193	543390	804	Oxidoreductase, short-chain dehydrogenase/reductase family (EC 1.1.1.-)	Capsular Polysaccharides Biosynthesis and Assembly		PEG607	804	1300	1476	2204		1300	1279.53	1212.78	1289.85	160.429	-0.0230904	1256.47	156.278	-0.100388		R
PEG608	fig|6666666.88372.peg.608	peg.608	CDS	LMR001-002	545719	544304	1416	8-amino-7-oxononanoate synthase (EC 2.3.1.47)	Biotin biosynthesis, Biotin biosynthesis Experimental		PEG608	1416	10436	13926	13022		10436	11245.6	10127.1	10846.4	765.99	0.10625	10287.2	726.494	-0.0448953		H
PEG609	fig|6666666.88372.peg.609	peg.609	CDS	LMR001-002	553089	545716	7374	Capsular polysaccharide biosynthesis fatty acid synthase WcbR	- none -		PEG609	7374	72633	101766	92618		72633	59108.2	82430	65859.4	893.13	-0.296822	77520.3	1051.27	0.182989		IQCR
PEG610	fig|6666666.88372.peg.610	peg.610	CDS	LMR001-002	553994	554791	798	Capsular polysaccharide biosynthesis/export periplasmic protein WcbA; Capsular polysaccharide export system protein KpsC	Capsular Polysaccharides Biosynthesis and Assembly, Capsular Polysaccharides Biosynthesis and Assembly, Rhamnose containing glycans, Rhamnose containing glycans		PEG610	798	8511	9700	10227		8511	8206.47	7856.63	8358.92	1047.48	-0.0526321	8184.01	1025.56	-0.115482		M	K01991
PEG611	fig|6666666.88372.peg.611	peg.611	CDS	LMR001-002	554993	555637	645	Nicotinamidase (EC 3.5.1.19)	NAD and NADP cofactor biosynthesis global		PEG611	646	1617	2467	2357		1617	2150.02	1333.03	1884.05	291.649	0.41007	1475.56	228.414	-0.279572		Q	K08281
PEG612	fig|6666666.88372.peg.612	peg.612	CDS	LMR001-002	555756	557060	1305	Nicotinate phosphoribosyltransferase (EC 2.4.2.11)	NAD and NADP cofactor biosynthesis global		PEG612	1305	4260	4595	5302		4260	3916.19	3665.21	4086.09	313.11	-0.120042	3960.6	303.494	-0.215597		H	K00763
PEG613	fig|6666666.88372.peg.613	peg.613	CDS	LMR001-002	557325	557561	237	HYPOTHETICAL UNKNOWN PROTEIN	- none -		PEG613	237	5358	2225	5559		5358	1945.91	3885.23	3651.94	1540.9	-1.46124	4621.6	1950.04	-0.463686
PEG614	fig|6666666.88372.peg.614	peg.614	CDS	LMR001-002	557859	557713	147	HYPOTHETICAL UNKNOWN TRANSMEMBRANE PROTEIN	- none -		PEG614	147	398	447	878		398	379.469	324.914	388.788	264.482	-0.0691735	361.511	245.926	-0.293099
PEG615	fig|6666666.88372.peg.615	peg.615	CDS	LMR001-002	559598	558159	1440	COG3866 Pectate lyase	- none -		PEG615	1440	888	1135	1954		888	1035.72	1044.43	961.44	66.7667	0.22338	965.792	67.0689	0.235453		G
PEG616	fig|6666666.88372.peg.616	peg.616	CDS	LMR001-002	560541	560750	210	miscellaneous; hypothetical/partial homology	- none -		PEG616	204	234	427	656		234	365.917	251.129	299.9	147.01	0.645723	242.507	118.876	0.10264
PEG617	fig|6666666.88372.peg.617	peg.617	CDS	LMR001-002	561038	562330	1293	UDP-N-acetylglucosamine 1-carboxyvinyltransferase (EC 2.5.1.7)	Peptidoglycan Biosynthesis, UDP-N-acetylmuramate from Fructose-6-phosphate Biosynthesis		PEG617	1293	8826	11568	12129		8826	9632.86	9422.81	9231.83	713.985	0.125421	9126.81	705.863	0.0936141		M	K00790
PEG618	fig|6666666.88372.peg.618	peg.618	CDS	LMR001-002	562430	562879	450	FIG00450379: hypothetical protein	- none -		PEG618	450	3585	4764	4598		3585	4060.39	3118.58	3820.67	849.039	0.181268	3349.77	744.393	-0.199461
PEG619	fig|6666666.88372.peg.619	peg.619	CDS	LMR001-002	562917	564221	1305	Histidinol dehydrogenase (EC 1.1.1.23)	Histidine Biosynthesis		PEG619	1305	5733	6883	8109		5733	5908.44	5958.19	5818.2	445.839	0.0447547	5843.08	447.745	0.0568534		E	K00013
PEG620	fig|6666666.88372.peg.620	peg.620	CDS	LMR001-002	564218	564694	477	FIG00450475: hypothetical protein	- none -		PEG620	477	1462	1888	2376		1462	1626.11	1347.86	1544.15	323.72	0.15331	1405.02	294.554	-0.117443		S
PEG621	fig|6666666.88372.peg.621	peg.621	CDS	LMR001-002	564670	565173	504	Arsenate reductase (EC 1.20.4.1)	Anaerobic respiratory reductases, Transcription repair cluster		PEG621	503	567	573	1108		567	472.972	433.981	520.258	103.431	-0.26298	500.763	99.5552	-0.387103		T
PEG622	fig|6666666.88372.peg.622	peg.622	CDS	LMR001-002	565293	565562	270	Translation initiation factor 1	Translation initiation factors bacterial		PEG622	270	2476	7745	5087		2476	6564.38	3490.89	4520.9	1674.41	1.40582	2984.15	1105.24	0.494753		J	K02518
PEG623	fig|6666666.88372.peg.623	peg.623	CDS	LMR001-002	565609	566229	621	Septum formation protein Maf	Bacterial Cell Division, Bacterial Cytoskeleton		PEG623	621	1666	5073	3113		1666	4313.69	1923.09	2990.47	481.557	1.37145	1795.17	289.077	0.205956		D	K06287
PEG624	fig|6666666.88372.peg.624	peg.624	CDS	LMR001-002	566236	566448	213	FIG00985035: hypothetical protein	- none -		PEG624	213	130	609	406		130	503.348	150.322	316.682	148.677	1.95286	140.17	65.8074	0.20936		S	K09862
PEG625	fig|6666666.88372.peg.625	peg.625	CDS	LMR001-002	567470	567240	231	MISCELLANEOUS; Unknown	- none -		PEG625	231	216	313	441		216	254.676	164.224	235.225	101.829	0.239136	189.999	82.2507	-0.39386
PEG626	fig|6666666.88372.peg.626	peg.626	CDS	LMR001-002	568155	569258	1104	HPr kinase	- none -		PEG626	1104	677	545	1486		677	451.633	676.428	564.637	51.1447	-0.585372	677.035	61.3256	-0.00258636		T
PEG627	fig|6666666.88372.peg.627	peg.627	CDS	LMR001-002	569245	570318	1074	FIG01075958: hypothetical protein	- none -		PEG627	1074	1020	587	1971		1020	485.039	1055.6	752.989	70.1107	-1.07372	1038.27	96.6734	0.0481725
PEG628	fig|6666666.88372.peg.628	peg.628	CDS	LMR001-002	570536	570844	309	MISCELLANEOUS; Unknown	- none -		PEG628	309	1131	715	1401		1131	592.724	619.883	861.26	278.725	-0.930629	874.839	283.119	-0.865995
PEG629	fig|6666666.88372.peg.629	peg.629	CDS	LMR001-002	571174	571338	165	hypothetical protein	- none -		PEG629	165	555	414	548		555	356.807	206.861	455.717	276.192	-0.636369	380.743	230.753	-1.42286
PEG630	fig|6666666.88372.peg.630	peg.630	CDS	LMR001-002	571814	571353	462	tRNA proofreading protein STM4549	tRNA aminoacylation, Pro		PEG630	462	1778	1679	2192		1778	1457.22	1204.15	1617.75	350.162	-0.287268	1491.21	322.774	-0.562468		S
PEG631	fig|6666666.88372.peg.631	peg.631	CDS	LMR001-002	572094	571906	189	HYPOTHETICAL UNKNOWN PROTEIN	- none -		PEG631	189	607	516	873		607	432.101	323.115	519.419	274.825	-0.489701	464.925	245.992	-0.909024
PEG632	fig|6666666.88372.peg.632	peg.632	CDS	LMR001-002	572517	572263	255	transglycosylase associated gene	- none -		PEG632	255	1742	1938	2718		1742	1668.49	1581.16	1705.15	668.685	-0.0620445	1661.48	651.562	-0.139602
PEG633	fig|6666666.88372.peg.633	peg.633	CDS	LMR001-002	574055	572763	1293	L-rhamnose isomerase (EC 5.3.1.14)	- none -		PEG633	1293	3171	1597	3637		3171	1384.81	2316.95	2277.19	176.117	-1.1946	2743.26	212.162	-0.452056		M	K01820
PEG634	fig|6666666.88372.peg.634	peg.634	CDS	LMR001-002	576168	574069	2100	Predicted rhamnulose-1-phosphate aldolase (EC 4.1.2.19) / Predicted lactaldehyde dehydrogenase (EC 1.2.1.22)	- none -		PEG634	2100	5609	3299	6974		5609	2930.35	5012.12	4270.42	203.353	-0.937049	5311.3	252.919	-0.162702		SIQR
PEG635	fig|6666666.88372.peg.635	peg.635	CDS	LMR001-002	576357	577190	834	Transcriptional regulator of rhamnose utilization, DeoR family	- none -		PEG635	822	2127	1070	2852		2127	963.32	1690.59	1545.73	188.045	-1.14351	1909.36	232.283	-0.332065		KG	K03477
PEG636	fig|6666666.88372.peg.636	peg.636	CDS	LMR001-002	577292	578281	990	Predicted L-rhamnose ABC transporter, substrate-binding component	- none -		PEG636	990	8363	2025	6132		8363	1751.62	4339.65	5053.82	510.487	-2.25413	6347.84	641.196	-0.945238		G	K10559
PEG637	fig|6666666.88372.peg.637	peg.637	CDS	LMR001-002	578571	580082	1512	Predicted L-rhamnose ABC transporter, ATP-binding component	- none -		PEG637	1512	1537	1069	2543		1537	963.32	1452.42	1250.74	82.7207	-0.675114	1495.29	98.8946	-0.0827427		G	K10562
PEG638	fig|6666666.88372.peg.638	peg.638	CDS	LMR001-002	580079	581059	981	Predicted L-rhamnose ABC transporter, transmembrane component 2	- none -		PEG638	980	605	403	1277		605	347.688	536.66	476.514	48.6239	-0.799955	571	58.2653	-0.173741		G	K10560
PEG639	fig|6666666.88372.peg.639	peg.639	CDS	LMR001-002	581059	582063	1005	Predicted L-rhamnose ABC transporter, transmembrane component 1	- none -		PEG639	1005	761	491	1653		761	412.739	812.417	586.533	58.3615	-0.881387	786.372	78.2459	0.0956023		G	K10561
PEG640	fig|6666666.88372.peg.640	peg.640	CDS	LMR001-002	582076	582390	315	L-rhamnose mutarotase	- none -		PEG640	314	250	183	477		250	140.711	178.627	195.373	62.2207	-0.829389	214.331	68.2583	-0.485175		S	K03534
PEG641	fig|6666666.88372.peg.641	peg.641	CDS	LMR001-002	582398	583789	1392	Rhamnulokinase RhaK in alpha-proteobacteria (EC 2.7.1.5)	- none -		PEG641	1390	631	699	1591		631	577.35	758.783	604.154	43.4643	-0.128097	694.87	49.9907	0.266145		G
PEG642	fig|6666666.88372.peg.642	peg.642	CDS	LMR001-002	583995	583882	114	hypothetical protein	- none -		PEG642	114	42	19	77		42	13.8661	20.3359	27.921	24.4921	-1.598	31.1559	27.3297	-1.04553
PEG643	fig|6666666.88372.peg.643	peg.643	CDS	LMR001-002	584505	586118	1614	Methyl-accepting chemotaxis protein	- none -		PEG643	1614	4999	899	2855		4999	761.153	1696.23	2880.75	178.485	-2.71577	3348.29	207.453	-1.5597		NT	K03406
PEG644	fig|6666666.88372.peg.644	peg.644	CDS	LMR001-002	586132	586425	294	CheX protein	- none -		PEG644	294	1568	229	895		1568	183.57	333.444	875.161	297.674	-3.09337	950.098	323.162	-2.23226		T	K03409
PEG645	fig|6666666.88372.peg.645	peg.645	CDS	LMR001-002	586429	586794	366	Chemotaxis regulator - transmits chemoreceptor signals to flagelllar motor components CheY	Bacterial Chemotaxis, Flagellar motility		PEG645	366	3256	453	1322		3256	383.743	566.621	1821.05	497.556	-3.08594	1912.49	522.539	-2.52369		T	K03413
PEG646	fig|6666666.88372.peg.646	peg.646	CDS	LMR001-002	586815	589091	2277	Signal transduction histidine kinase CheA (EC 2.7.3.-)	Bacterial Chemotaxis, Flagellar motility		PEG646	2277	12891	1974	5588		12891	1701.25	3906.44	7291.87	320.24	-2.92074	8394.47	368.663	-1.72149		NT	K03407
PEG647	fig|6666666.88372.peg.647	peg.647	CDS	LMR001-002	589097	589564	468	Positive regulator of CheA protein activity (CheW)	Bacterial Chemotaxis		PEG647	468	1076	187	763		1076	144.638	284.153	610.552	130.46	-2.89578	680.309	145.365	-1.92156		NT	K03408
PEG648	fig|6666666.88372.peg.648	peg.648	CDS	LMR001-002	589561	590469	909	Chemotaxis protein methyltransferase CheR (EC 2.1.1.80)	Bacterial Chemotaxis		PEG648	909	2689	600	1832		2689	495.348	965.337	1593.44	175.296	-2.44192	1828.44	201.148	-1.47932		NT	K00575
PEG649	fig|6666666.88372.peg.649	peg.649	CDS	LMR001-002	590466	591515	1050	Chemotaxis response regulator protein-glutamate methylesterase CheB (EC 3.1.1.61)	Bacterial Chemotaxis		PEG649	1050	4462	1086	2863		4462	983.447	1701.81	2725.14	259.537	-2.18333	3084.32	293.745	-1.39218		NT	K03412
PEG650	fig|6666666.88372.peg.650	peg.650	CDS	LMR001-002	591515	591904	390	Chemotaxis regulator - transmits chemoreceptor signals to flagelllar motor components CheY	Bacterial Chemotaxis, Flagellar motility		PEG650	390	2253	550	1060		2253	455.194	410.259	1354.72	347.363	-2.30809	1332.25	341.602	-2.45804		KT	K03413
PEG651	fig|6666666.88372.peg.651	peg.651	CDS	LMR001-002	591907	592455	549	Chemotaxis protein CheD	Bacterial Chemotaxis		PEG651	549	1971	438	1067		1971	373.265	413.363	1172.84	213.633	-2.4017	1192.89	217.285	-2.25449		NT	K03411
PEG652	fig|6666666.88372.peg.652	peg.652	CDS	LMR001-002	592516	592899	384	FIG00983930: hypothetical protein	- none -		PEG652	384	1047	205	646		1047	161.686	246.886	604.407	157.398	-2.69517	647.007	168.491	-2.08452
PEG653	fig|6666666.88372.peg.653	peg.653	CDS	LMR001-002	593193	594866	1674	Flagellar M-ring protein FliF	Flagellum		PEG653	1674	7322	191	2598		7322	148.317	1493.5	3738.28	223.314	-5.62671	4410.87	263.493	-2.29477		NU	K02409
PEG654	fig|6666666.88372.peg.654	peg.654	CDS	LMR001-002	595739	596476	738	putative GerE/LuxR family transcriptional regulator	- none -		PEG654	738	1387	533	1586		1387	443.792	752.698	915.274	124.021	-1.64376	1069.73	144.949	-0.881571		K
PEG655	fig|6666666.88372.peg.655	peg.655	CDS	LMR001-002	596488	597228	741	FIG00792295: hypothetical protein	- none -		PEG655	737	790	213	1189		790	168.828	477.905	479.753	65.0954	-2.22754	634.292	86.064	-0.726367		K
PEG656	fig|6666666.88372.peg.656	peg.656	CDS	LMR001-002	597823	597383	441	(U95165) OrfY	- none -		PEG656	441	1956	468	1033		1956	394.488	399.501	1174.41	266.307	-2.30863	1176.92	266.875	-2.29041
PEG657	fig|6666666.88372.peg.657	peg.657	CDS	LMR001-002	598908	597826	1083	Flagellar biosynthesis protein FlhB	Flagellar motility, Flagellum		PEG657	1083	1550	2324	2653		1550	2028.31	1533.6	1788.56	165.149	0.389109	1541.21	142.309	-0.0142423		NU	K02401
PEG658	fig|6666666.88372.peg.658	peg.658	CDS	LMR001-002	600165	599137	1029	Flagellar motor switch protein FliG	Bacterial Chemotaxis, Flagellum		PEG658	1029	6576	245	2084		6576	197.317	1123.5	3386.95	329.149	-5.05875	3850.04	374.153	-2.54934		N	K02410
PEG659	fig|6666666.88372.peg.659	peg.659	CDS	LMR001-002	600795	600196	600	Flagellar motor switch protein FliN	Bacterial Chemotaxis, Flagellar motility, Flagellum		PEG659	600	3347	80	859		3347	57.8896	317.336	1703.77	283.962	-5.85457	1833.5	305.583	-3.39993		NU	K02417
PEG660	fig|6666666.88372.peg.660	peg.660	CDS	LMR001-002	601796	600849	948	Flagellar motor switch protein FliM	Bacterial Chemotaxis, Flagellar motility, Flagellum		PEG660	948	3573	186	1573		3573	143.846	743.478	1858.29	196.022	-4.63443	2158.1	227.648	-2.26466		N	K02416
PEG661	fig|6666666.88372.peg.661	peg.661	CDS	LMR001-002	602671	601793	879	Flagellar motor rotation protein MotA	Flagellar motility, Flagellum		PEG661	879	5472	214	1854		5472	169.754	980.195	2819.96	320.814	-5.01007	3225.18	366.914	-2.48044		N	K02556
PEG662	fig|6666666.88372.peg.662	peg.662	CDS	LMR001-002	602830	603630	801	Flagellar basal-body rod protein FlgF	Flagellum		PEG662	801	3162	173	1165		3162	131.617	463.842	1646.95	205.611	-4.58654	1813.06	226.35	-2.76926
PEG663	fig|6666666.88372.peg.663	peg.663	CDS	LMR001-002	603632	604357	726	Flagellar basal-body rod protein FlgF	Flagellum		PEG663	726	2158	139	1230		2158	103.193	504.802	1130.47	155.712	-4.38611	1331.27	183.371	-2.09573		N	K02391
PEG664	fig|6666666.88372.peg.664	peg.664	CDS	LMR001-002	604424	605833	1410	Flagellum-specific ATP synthase FliI	Flagellar motility, Flagellum		PEG664	1410	2570	229	1848		2570	183.57	977.263	1376.98	97.6584	-3.80759	1773.83	125.804	-1.39517		NU	K02412
PEG665	fig|6666666.88372.peg.665	peg.665	CDS	LMR001-002	605937	606488	552	FIG01075524: hypothetical protein	- none -		PEG665	552	939	75	732		939	54.1219	276.249	496.923	90.0222	-4.11795	607.986	110.142	-1.76627
PEG666	fig|6666666.88372.peg.666	peg.666	CDS	LMR001-002	606705	607085	381	Flagellar basal-body rod protein FlgB	Flagellum, Flagellum in Campylobacter		PEG666	381	3486	41	1093		3486	28.9759	426.116	1756.17	460.938	-6.90949	1954.74	513.056	-3.03117		N	K02387
PEG667	fig|6666666.88372.peg.667	peg.667	CDS	LMR001-002	607091	607510	420	Flagellar basal-body rod protein FlgC	Flagellum, Flagellum in Campylobacter		PEG667	420	3574	60	975		3574	42.5173	375.083	1807.62	430.386	-6.39283	1973.91	469.978	-3.25174		N	K02388
PEG668	fig|6666666.88372.peg.668	peg.668	CDS	LMR001-002	607510	607845	336	Flagellar hook-basal body complex protein FliE	Flagellum, Flagellum in Campylobacter		PEG668	336	1635	37	486		1635	26.1612	182.14	831.489	247.467	-5.96732	909.478	270.678	-3.16777		NU	K02408
PEG669	fig|6666666.88372.peg.669	peg.669	CDS	LMR001-002	607857	608645	789	Flagellar hook protein FlgE	Flagellum		PEG669	789	5955	282	1812		5955	225.651	950.016	3091.14	391.779	-4.72233	3453.32	437.683	-2.64847		N	K02392
PEG670	fig|6666666.88372.peg.670	peg.670	CDS	LMR001-002	608664	609173	510	Flagellar basal-body P-ring formation protein FlgA	Flagellum		PEG670	510	2746	48	900		2746	33.8363	335.476	1390.87	272.719	-6.34361	1541.69	302.291	-3.03404		NO	K02386
PEG671	fig|6666666.88372.peg.671	peg.671	CDS	LMR001-002	609176	610285	1110	Flagellar P-ring protein FlgI	Flagellum		PEG671	1110	4532	165	2269		4532	124.215	1270.29	2326.6	209.603	-5.18828	2899.63	261.228	-1.83403		N	K02394
PEG672	fig|6666666.88372.peg.672	peg.672	CDS	LMR001-002	610282	610821	540	FIG00450025: hypothetical protein	- none -		PEG672	540	1820	78	834		1820	56.4013	307.107	938.051	173.713	-5.01183	1063.4	196.927	-2.56689		S
PEG673	fig|6666666.88372.peg.673	peg.673	CDS	LMR001-002	610818	611528	711	Flagellar L-ring protein FlgH	Flagellar motility, Flagellum		PEG673	711	3206	171	1186		3206	129.8	476.25	1668.03	234.604	-4.62653	1841.26	258.968	-2.75111		N	K02393
PEG674	fig|6666666.88372.peg.674	peg.674	CDS	LMR001-002	611569	612057	489	Flagellar biosynthesis protein FliL	Flagellum		PEG674	489	1653	77	839		1653	55.5938	309.404	853.778	174.597	-4.89311	980.683	200.549	-2.41662		N	K02415
PEG675	fig|6666666.88372.peg.675	peg.675	CDS	LMR001-002	612065	612802	738	Flagellar biosynthesis protein FliP	Flagellum		PEG675	738	2223	2499	2684		2223	2178.07	1557.12	2200.69	298.197	-0.029658	1890.21	256.126	-0.513833		NU	K02419
PEG676	fig|6666666.88372.peg.676	peg.676	CDS	LMR001-002	613097	613993	897	Flagellin protein FlaA	Flagellum, Flagellum in Campylobacter		PEG676	897	48415	16415	19272		48415	12955.2	15254.9	30686.2	3420.98	-1.90199	31836.1	3549.17	-1.66624		N	K02406
PEG677	fig|6666666.88372.peg.677	peg.677	CDS	LMR001-002	614242	615258	1017	Flagellin protein FlaA	Flagellum, Flagellum in Campylobacter		PEG677	1017	50634	7512	14026		50634	6389.91	10919.8	28486.2	2801	-2.98477	30751.1	3023.71	-2.21169		N	K02406
PEG678	fig|6666666.88372.peg.678	peg.678	CDS	LMR001-002	618785	615423	3363	Alkaline phosphatase (EC 3.1.3.1)	Phosphate metabolism		PEG678	3363	18219	18658	20832		18219	14496.8	16584.5	16367.9	486.705	-0.331288	17411.7	517.744	-0.13719
PEG679	fig|6666666.88372.peg.679	peg.679	CDS	LMR001-002	619754	620671	918	Flagellin protein FlaA	Flagellum, Flagellum in Campylobacter		PEG679	918	8933	2772	4041		8933	2409.67	2636.27	5671.36	617.796	-1.89032	5784.66	630.137	-1.76066		N	K02406
PEG680	fig|6666666.88372.peg.680	peg.680	CDS	LMR001-002	621025	621990	966	Flagellin protein FlaA	Flagellum, Flagellum in Campylobacter		PEG680	966	4257	1657	2815		4257	1437.74	1658.59	2846.86	294.706	-1.56569	2957.29	306.137	-1.35954		N	K02406
PEG681	fig|6666666.88372.peg.681	peg.681	CDS	LMR001-002	622025	622165	141	hypothetical protein	- none -		PEG681	141	160	31	150		160	21.9529	47.8111	90.9544	64.5066	-2.86519	103.883	73.6762	-1.74226
PEG682	fig|6666666.88372.peg.682	peg.682	CDS	LMR001-002	622326	622192	135	hypothetical protein	- none -		PEG682	135	198	16	76		198	11.8901	20.0378	105.021	77.7936	-4.05877	109.095	80.8113	-3.30582
PEG683	fig|6666666.88372.peg.683	peg.683	CDS	LMR001-002	622459	623130	672	FIG00450700: hypothetical protein	- none -		PEG683	672	1967	128	941		1967	94.4296	357.497	1031.16	153.446	-4.38126	1162.69	173.02	-2.46064
PEG684	fig|6666666.88372.peg.684	peg.684	CDS	LMR001-002	623127	624326	1200	Flagellar motor rotation protein MotB	CBSS-323098.3.peg.2823, Flagellar motility, Flagellum		PEG684	1200	2819	195	1819		2819	152.115	956.192	1485.25	123.771	-4.21163	1887.29	157.274	-1.55949		N	K02557
PEG685	fig|6666666.88372.peg.685	peg.685	CDS	LMR001-002	624332	625639	1308	Chemotaxis protein motC	- none -		PEG685	1303	2042	120	1478		2042	87.9859	671.777	1064.86	81.7239	-4.53638	1356.76	104.126	-1.60374			K10564
PEG686	fig|6666666.88372.peg.686	peg.686	CDS	LMR001-002	625636	627093	1458	Flagellar hook-length control protein FliK	Flagellum		PEG686	1398	4873	131	2315		4873	96.7808	1307.15	2486.03	177.828	-5.65462	3091.22	221.117	-1.89906		N	K10565
PEG687	fig|6666666.88372.peg.687	peg.687	CDS	LMR001-002	627053	627595	543	Soluble lytic murein transglycosylase and related regulatory proteins (some contain LysM/invasin domains)	- none -		PEG687	543	808	219	639		808	174.373	244.564	490.804	90.3875	-2.21081	525.9	96.8508	-1.72278		M
PEG688	fig|6666666.88372.peg.688	peg.688	CDS	LMR001-002	627867	628538	672	Transcriptional regulator	- none -		PEG688	672	3106	177	1075		3106	135.357	416.539	1619.96	241.065	-4.51955	1760.55	261.987	-2.89786		TK
PEG689	fig|6666666.88372.peg.689	peg.689	CDS	LMR001-002	628629	629837	1209	Flagellar hook protein FlgE	Flagellum		PEG689	1209	18875	600	4026		18875	495.348	2628.68	9687.63	801.293	-5.25227	10754.3	889.52	-2.84444		N	K02390
PEG690	fig|6666666.88372.peg.690	peg.690	CDS	LMR001-002	629860	631290	1431	Flagellar hook-associated protein FlgK	Flagellum		PEG690	1431	10870	524	2931		10870	437.067	1760.23	5650.66	394.875	-4.63559	6312.24	441.107	-2.62575		N	K02396
PEG691	fig|6666666.88372.peg.691	peg.691	CDS	LMR001-002	631293	632342	1050	Flagellar hook-associated protein FlgL	Flagellum		PEG691	1050	9471	443	3034		9471	376.599	1853.5	4919.49	468.522	-4.6511	5657.94	538.851	-2.35195		N	K02397
PEG692	fig|6666666.88372.peg.692	peg.692	CDS	LMR001-002	632380	632727	348	Flagellar protein FlaF	- none -		PEG692	348	6448	738	2534		6448	614.842	1448.53	3528.27	1013.87	-3.38915	3945.11	1133.65	-2.15285		N	K06602
PEG693	fig|6666666.88372.peg.693	peg.693	CDS	LMR001-002	632724	633173	450	Flagellar basal-body rod modification protein FlgD	Flagellar motility, Flagellum		PEG693	450	6775	647	2197		6775	533.105	1208.44	3654.76	812.169	-3.66803	3992.43	887.206	-2.48737		N	K06601
PEG694	fig|6666666.88372.peg.694	peg.694	CDS	LMR001-002	633164	633580	417	Flagellar basal-body rod modification protein FlgD	Flagellar motility, Flagellum		PEG694	417	5561	537	1792		5561	446.314	934.947	3002.68	720.067	-3.63871	3246.99	778.656	-2.57188		N	K02389
PEG695	fig|6666666.88372.peg.695	peg.695	CDS	LMR001-002	633587	633853	267	Flagellar biosynthesis protein FliQ	Flagellum		PEG695	267	1560	668	1074		1560	550.43	416.539	1054.99	395.128	-1.5025	988.046	370.055	-1.90461		NU	K02420
PEG696	fig|6666666.88372.peg.696	peg.696	CDS	LMR001-002	633970	636057	2088	Flagellar biosynthesis protein FlhA	Flagellar motility, Flagellum		PEG696	2088	4187	666	3038		4187	547.95	1860.23	2367.94	113.407	-2.93412	3024.08	144.831	-1.17076		NU	K02400
PEG697	fig|6666666.88372.peg.697	peg.697	CDS	LMR001-002	636054	636806	753	Flagellar biosynthesis protein FliR	Flagellar motility, Flagellum		PEG697	753	1929	1497	2219		1929	1296.33	1225.9	1611.93	214.068	-0.572315	1576.71	209.391	-0.652905		NU	K02421
PEG698	fig|6666666.88372.peg.698	peg.698	CDS	LMR001-002	636812	637225	414	FIG00985442: hypothetical protein	- none -		PEG698	414	469	279	736		469	223.705	277.079	346.259	83.6375	-1.06742	372.946	90.0837	-0.758715
PEG699	fig|6666666.88372.peg.699	peg.699	CDS	LMR001-002	637315	637866	552	Flagellar protein FlgJ [peptidoglycan hydrolase] (EC 3.2.1.-)	Flagellum		PEG699	552	5299	430	1689		5299	367.866	847.603	2832.25	513.089	-3.84783	3072.12	556.543	-2.64362
PEG700	fig|6666666.88372.peg.700	peg.700	CDS	LMR001-002	637997	638365	369	FIG00985184: hypothetical protein	- none -		PEG700	369	2314	310	827		2314	250.922	304.972	1281.49	347.288	-3.20387	1308.52	354.612	-2.92243
PEG701	fig|6666666.88372.peg.701	peg.701	CDS	LMR001-002	638365	638934	570	Type I restriction-modification system methyltransferase subunit	- none -		PEG701	570	2013	425	1015		2013	364.593	392.17	1189.16	208.624	-2.46551	1202.95	211.043	-2.36032
PEG702	fig|6666666.88372.peg.702	peg.702	CDS	LMR001-002	639902	638931	972	Glycosyl transferase, group 2 family protein	- none -		PEG702	972	860	486	1855		860	409.009	980.195	634.011	65.2275	-1.07055	919.604	94.6095	0.190388		R
PEG703	fig|6666666.88372.peg.703	peg.703	CDS	LMR001-002	640271	641170	900	Methylenetetrahydrofolate dehydrogenase (NADP+) (EC 1.5.1.5) / Methenyltetrahydrofolate cyclohydrolase (EC 3.5.4.9)	5-FCL-like protein, One-carbon metabolism by tetrahydropterines, One-carbon metabolism by tetrahydropterines, Serine-glyoxylate cycle, Serine-glyoxylate cycle		PEG703	900	14184	10224	13197		14184	8638.9	10247.2	11414.7	1268.3	-0.716014	12218.9	1357.66	-0.469701		H	K01491
PEG704	fig|6666666.88372.peg.704	peg.704	CDS	LMR001-002	642230	641199	1032	Transcriptional regulator AglR, LacI family	Periplasmic-Binding-Protein-Dependent Transport System for &#945;-Glucosides		PEG704	1032	4122	6175	5596		4122	5333.18	3917.04	4727.08	458.05	0.37201	4019.01	389.439	-0.0732212		K	K02529
PEG705	fig|6666666.88372.peg.705	peg.705	CDS	LMR001-002	642536	643894	1359	Alpha-glucosides-binding periplasmic protein AglE precursor	Periplasmic-Binding-Protein-Dependent Transport System for &#945;-Glucosides		PEG705	1359	175405	82141	124818		175405	49589.5	112823	112489	8277.32	-1.82244	144105	10603.8	-0.636492		G	K10232
PEG706	fig|6666666.88372.peg.706	peg.706	CDS	LMR001-002	644057	643887	171	hypothetical protein	- none -		PEG706	171	6230	4157	5242		6230	3581.21	3614.23	4902.1	2866.73	-0.797165	4918.62	2876.39	-0.783921
PEG707	fig|6666666.88372.peg.707	peg.707	CDS	LMR001-002	644049	645059	1011	ABC alpha-glucoside transporter, inner membrane subunit AglF	Periplasmic-Binding-Protein-Dependent Transport System for &#945;-Glucosides		PEG707	1011	28883	18554	25809		28883	14411.5	20991.9	21659.2	2142.35	-1.00419	24949.4	2467.79	-0.461575		G	K10233
PEG708	fig|6666666.88372.peg.708	peg.708	CDS	LMR001-002	645061	646206	1146	Alpha-glucoside transport system permease protein AglG	Periplasmic-Binding-Protein-Dependent Transport System for &#945;-Glucosides		PEG708	1146	13001	8020	14399		13001	6779.11	11206.5	9890.4	863.037	-0.939533	12104.1	1056.2	-0.214363		G	K10234
PEG709	fig|6666666.88372.peg.709	peg.709	CDS	LMR001-002	646237	647892	1656	Alpha-glucosidase AglA	Periplasmic-Binding-Protein-Dependent Transport System for &#945;-Glucosides		PEG709	1656	38571	24228	38898		38571	18070.3	32658.4	28309.1	1709.48	-1.09303	35603.1	2149.95	-0.239198		G	K01187
PEG710	fig|6666666.88372.peg.710	peg.710	CDS	LMR001-002	647912	649000	1089	Alpha-glucoside transport ATP-binding protein AglK	Periplasmic-Binding-Protein-Dependent Transport System for &#945;-Glucosides		PEG710	1089	30950	16508	29736		30950	13035.1	24418.2	22004.7	2020.63	-1.24866	27696.2	2543.27	-0.343108		G	K10235
PEG711	fig|6666666.88372.peg.711	peg.711	CDS	LMR001-002	649204	649614	411	FIG00984583: hypothetical protein	- none -		PEG711	409	1345	2487	2217		1345	2168.73	1225.9	1757.3	429.657	0.688324	1285.88	314.396	-0.134685
PEG712	fig|6666666.88372.peg.712	peg.712	CDS	LMR001-002	651481	649661	1821	Phosphogluconate dehydratase (EC 4.2.1.12)	Entner-Doudoroff Pathway		PEG712	1821	9285	19463	11550		9285	15017.7	8968.81	12153.7	667.419	0.69297	9129.24	501.331	-0.0507092		EG	K01690
PEG713	fig|6666666.88372.peg.713	peg.713	CDS	LMR001-002	652408	651722	687	6-phosphogluconolactonase (EC 3.1.1.31), eukaryotic type	Entner-Doudoroff Pathway, Pentose phosphate pathway		PEG713	687	3803	7104	4640		3803	6085.48	3153.96	4943.69	719.605	0.678652	3477.93	506.249	-0.269553		G	K01057
PEG714	fig|6666666.88372.peg.714	peg.714	CDS	LMR001-002	653905	652430	1476	Glucose-6-phosphate 1-dehydrogenase (EC 1.1.1.49)	Entner-Doudoroff Pathway, Pentose phosphate pathway		PEG714	1476	12352	29857	16716		12352	21516	13115.8	16937.8	1147.54	0.799795	12737.7	862.985	0.085693		G	K00036
PEG715	fig|6666666.88372.peg.715	peg.715	CDS	LMR001-002	655389	654103	1287	Oxidoreductase	- none -		PEG715	1287	5723	4648	7201		5723	3961.04	5195.86	4844.5	376.418	-0.532142	5461.91	424.391	-0.140658		E	K09471
PEG716	fig|6666666.88372.peg.716	peg.716	CDS	LMR001-002	656773	655406	1368	glutamine synthetase family protein	Glutamine, Glutamate, Aspartate and Asparagine Biosynthesis		PEG716	1368	11667	7856	14863		11667	6648.45	11583.3	9158.27	669.464	-0.81148	11625.7	849.832	-0.0105235		E	K01915
PEG717	fig|6666666.88372.peg.717	peg.717	CDS	LMR001-002	656913	658151	1239	FIG00986488: hypothetical protein	- none -		PEG717	1229	1240	2107	2717		1240	1839.95	1581.16	1539.37	125.254	0.570729	1409.98	114.726	0.352044		R	K07007
PEG718	fig|6666666.88372.peg.718	peg.718	CDS	LMR001-002	658400	658191	210	hypothetical protein	- none -		PEG718	210	5100	3743	5237		5100	3267.66	3614.23	4186.35	1993.5	-0.643669	4359.64	2076.02	-0.498235
PEG719	fig|6666666.88372.peg.719	peg.719	CDS	LMR001-002	658479	658619	141	hypothetical protein	- none -		PEG719	141	2235	1408	2368		2235	1229.14	1340.76	1731.36	1227.91	-0.8617	1787.17	1267.49	-0.736302
PEG720	fig|6666666.88372.peg.720	peg.720	CDS	LMR001-002	658963	661488	2526	Methyl-accepting chemotaxis protein	- none -		PEG720	2526	13550	2256	6303		13550	1970.55	4472.69	7761.22	307.253	-2.78183	9012.29	356.781	-1.59928		NT	K03406
PEG721	fig|6666666.88372.peg.721	peg.721	CDS	LMR001-002	661855	661649	207	hypothetical protein	- none -		PEG721	206	85	139	227		85	103.193	80.4554	94.0554	45.658	0.281199	82.6867	40.1392	-0.0778818
PEG722	fig|6666666.88372.peg.722	peg.722	CDS	LMR001-002	661955	662821	867	Transcriptional regulator, LysR family	CBSS-349102.4.peg.3442		PEG722	867	1351	3255	2761		1351	2900.48	1615.79	2126.27	245.245	1.10112	1483.93	171.157	0.257069		K
PEG723	fig|6666666.88372.peg.723	peg.723	CDS	LMR001-002	663254	663015	240	FIG00984811: hypothetical protein	- none -		PEG723	240	122	178	358		122	136.127	131.912	129.013	53.7555	0.159273	126.906	52.8773	0.113891
PEG724	fig|6666666.88372.peg.724	peg.724	CDS	LMR001-002	664736	663369	1368	Isocitrate lyase (EC 4.1.3.1)	Glyoxylate bypass, Glyoxylate bypass cluster, Serine-glyoxylate cycle		PEG724	1379	365	581	1865		365	479.425	988.888	422.089	30.6084	0.39438	676.821	49.0806	1.43888		C	K01637
PEG725	fig|6666666.88372.peg.725	peg.725	CDS	LMR001-002	664892	666301	1410	Predicted transcriptional regulator	- none -		PEG725	1410	1043	2673	2765		1043	2320.69	1620.87	1681.51	119.256	1.15476	1331.6	94.4394	0.636978		RK	K07110
PEG726	fig|6666666.88372.peg.726	peg.726	CDS	LMR001-002	666536	667630	1095	Putrescine ABC transporter putrescine-binding protein PotF (TC 3.A.1.11.2)	GABA and putrescine metabolism from cluters, Polyamine Metabolism		PEG726	1095	43305	39374	43868		43305	27102.6	37128.8	35226.9	3217.06	-0.677635	40239.9	3674.88	-0.223531		E	K11073
PEG727	fig|6666666.88372.peg.727	peg.727	CDS	LMR001-002	667774	668916	1143	Putrescine transport ATP-binding protein PotG (TC 3.A.1.11.2)	GABA and putrescine metabolism from cluters, Polyamine Metabolism		PEG727	1143	6655	4300	6545		6655	3678.88	4664.26	5165.81	451.952	-0.854679	5658.49	495.056	-0.5123		E	K11076
PEG728	fig|6666666.88372.peg.728	peg.728	CDS	LMR001-002	668921	669832	912	Putrescine transport system permease protein PotH (TC 3.A.1.11.2)	GABA and putrescine metabolism from cluters, Polyamine Metabolism		PEG728	912	4668	2302	4892		4668	2010.94	3345.1	3338.77	366.093	-1.2145	4005.85	439.238	-0.48032		E	K11075
PEG729	fig|6666666.88372.peg.729	peg.729	CDS	LMR001-002	669836	670657	822	Putrescine transport system permease protein PotI (TC 3.A.1.11.2)	Polyamine Metabolism		PEG729	822	3579	1909	3892		3579	1645.07	2519.11	2613.02	317.885	-1.1222	3050.04	371.051	-0.507434		E	K11074
PEG730	fig|6666666.88372.peg.730	peg.730	CDS	LMR001-002	672500	670674	1827	AsmA family protein	- none -		PEG730	1826	2801	5260	5348		2801	4478.67	3706.54	3638.83	199.279	0.67817	3252.76	178.136	0.405171		M	K07289
PEG731	fig|6666666.88372.peg.731	peg.731	CDS	LMR001-002	672640	672497	144	hypothetical protein	- none -		PEG731	111	5	3	79		5	3.14542	21.0699	4.07288	3.66927	-0.668773	13.0351	11.7434	2.07508
PEG732	fig|6666666.88372.peg.732	peg.732	CDS	LMR001-002	672673	674625	1953	Acetoacetyl-CoA synthetase (EC 6.2.1.16)	HMG CoA Synthesis, Leucine Degradation and HMG-CoA Metabolism, Polyhydroxybutyrate metabolism		PEG732	1953	30402	14072	27515		30402	11333.3	22503.2	20871.1	1068.67	-1.42393	26456	1354.63	-0.434364		I	K01907
PEG733	fig|6666666.88372.peg.733	peg.733	CDS	LMR001-002	676702	674924	1779	Ferric iron ABC transporter, permease protein	Iron acquisition in Streptococcus		PEG733	1779	1049	1971	3134		1049	1701.25	1942.15	1375.4	77.3129	0.696836	1495.84	84.0834	0.887892		P	K02011
PEG734	fig|6666666.88372.peg.734	peg.734	CDS	LMR001-002	680157	676744	3414	Sensory histidine kinase AtoS	Orphan regulatory proteins		PEG734	3414	10872	7253	17734		10872	6198.52	13974.1	8531.39	249.894	-0.809593	12419.2	363.772	0.363162		T
PEG735	fig|6666666.88372.peg.735	peg.735	CDS	LMR001-002	680385	680825	441	Methyl-accepting chemotaxis protein	- none -		PEG735	441	111499	102063	191013		111499	59220	176445	85324.7	19348	-0.911974	143937	32638.8	0.663089		S
PEG736	fig|6666666.88372.peg.736	peg.736	CDS	LMR001-002	681949	681068	882	Transcriptional regulator, LysR family	CBSS-349102.4.peg.3442		PEG736	882	840	1347	1658		840	1184.27	819.405	1011.86	114.724	0.496463	829.433	94.04	-0.0348845		K
PEG737	fig|6666666.88372.peg.737	peg.737	CDS	LMR001-002	682062	683558	1497	Methylmalonate-semialdehyde dehydrogenase (EC 1.2.1.27)	Valine degradation		PEG737	1497	33573	28590	22176		33573	20735.3	17751.2	27154.5	1813.93	-0.695246	25662.5	1714.26	-0.919419		C	K00140
PEG738	fig|6666666.88372.peg.738	peg.738	CDS	LMR001-002	683797	684894	1098	putative membrane protein	- none -		PEG738	1098	2300	1660	2913		2300	1440.94	1742.24	1871.19	170.418	-0.675526	2021.84	184.139	-0.401595		S
PEG739	fig|6666666.88372.peg.739	peg.739	CDS	LMR001-002	684884	685945	1062	Zn-dependent protease with chaperone function	- none -		PEG739	1061	1615	1255	2336		1615	1123.89	1318.16	1369.12	129.041	-0.522464	1466.26	138.196	-0.292431		R
PEG740	fig|6666666.88372.peg.740	peg.740	CDS	LMR001-002	687049	686006	1044	Ferric iron ABC transporter, iron-binding protein	Iron acquisition in Streptococcus		PEG740	1044	27033	28144	29213		27033	20454.3	23998.2	23746.9	2274.61	-0.402669	25518.9	2444.34	-0.172149		P	K02012
PEG741	fig|6666666.88372.peg.741	peg.741	CDS	LMR001-002	687236	687700	465	Iron-responsive repressor RirA	Rrf2 family transcriptional regulators		PEG741	465	7064	8534	11696		7064	7201.06	9073.75	7132.12	1533.79	0.0278925	8068.46	1735.15	0.361383		K	K13772
PEG742	fig|6666666.88372.peg.742	peg.742	CDS	LMR001-002	687731	687943	213	hypothetical protein	- none -		PEG742	213	462	495	796		462	416.458	294.045	439.419	206.3	-0.150912	378.213	177.565	-0.653043
PEG743	fig|6666666.88372.peg.743	peg.743	CDS	LMR001-002	687940	689535	1596	Dipeptide-binding ABC transporter, periplasmic substrate-binding component (TC 3.A.1.5.2)	ABC transporter dipeptide (TC 3.A.1.5.2), Bacterial Chemotaxis		PEG743	1596	268702	230635	234612		268702	117619	218315	193077	12097.5	-1.19098	243425	15252.2	-0.298693		E	K12368
PEG744	fig|6666666.88372.peg.744	peg.744	CDS	LMR001-002	689647	690651	1005	Dipeptide transport system permease protein DppB (TC 3.A.1.5.2)	ABC transporter dipeptide (TC 3.A.1.5.2)		PEG744	1005	7652	14565	10992		7652	11666	8501.88	9660.96	961.29	0.607648	8078.92	803.873	0.151198		EP	K12369
PEG745	fig|6666666.88372.peg.745	peg.745	CDS	LMR001-002	690662	691570	909	Dipeptide transport system permease protein DppC (TC 3.A.1.5.2)	ABC transporter dipeptide (TC 3.A.1.5.2)		PEG745	909	4483	8509	7020		4483	7184.85	5050.97	5836.15	642.041	0.679061	4769.21	524.666	0.170664		EP	K12370
PEG746	fig|6666666.88372.peg.746	peg.746	CDS	LMR001-002	691572	692426	855	Dipeptide transport ATP-binding protein DppD (TC 3.A.1.5.2)	ABC transporter dipeptide (TC 3.A.1.5.2)		PEG746	855	6216	11343	8853		6216	9489.88	6633.89	7856.44	918.882	0.60878	6428.45	751.865	0.0922447		EP	K12371
PEG747	fig|6666666.88372.peg.747	peg.747	CDS	LMR001-002	692423	693250	828	Dipeptide transport ATP-binding protein DppF (TC 3.A.1.5.2)	ABC transporter dipeptide (TC 3.A.1.5.2)		PEG747	828	5372	9436	8461		5372	7984.6	6264.57	6677.46	806.457	0.572213	5817.44	702.59	0.222207		R	K12372
PEG748	fig|6666666.88372.peg.748	peg.748	CDS	LMR001-002	693448	693792	345	RidA/YER057c/UK114 superfamily, group 2, YoaB-like protein	- none -		PEG748	345	7842	7722	8416		7842	6550.57	6228.96	7192.43	2084.76	-0.258184	7031.63	2038.15	-0.330813		J
PEG749	fig|6666666.88372.peg.749	peg.749	CDS	LMR001-002	693998	693789	210	hypothetical protein	- none -		PEG749	210	1593	2269	1949		1593	1984.11	1041.67	1788.16	851.504	0.317462	1316.94	627.113	-0.612136
PEG750	fig|6666666.88372.peg.750	peg.750	CDS	LMR001-002	693997	694167	171	HYPOTHETICAL TRANSMEMBRANE PROTEIN	- none -		PEG750	164	240	686	632		240	565.767	241.418	402.825	245.625	1.23788	240.651	146.738	0.00919902
PEG751	fig|6666666.88372.peg.751	peg.751	CDS	LMR001-002	694278	695402	1125	transport protein	- none -		PEG751	1122	646	1258	2158		646	1125.65	1175.33	885.651	78.935	0.801921	910.492	81.149	0.864233		R
PEG752	fig|6666666.88372.peg.752	peg.752	CDS	LMR001-002	696348	695554	795	DNA-directed RNA polymerase specialized sigma subunit, sigma24-like	CBSS-316057.3.peg.1308		PEG752	795	2970	2862	3902		2970	2498.86	2526.77	2735.26	344.058	-0.25	2749.22	345.813	-0.233979		KT
PEG753	fig|6666666.88372.peg.753	peg.753	CDS	LMR001-002	696531	696716	186	hypothetical protein	- none -		PEG753	186	270	416	470		270	358.212	175.613	313.993	168.813	0.409063	222.694	119.728	-0.619349
PEG754	fig|6666666.88372.peg.754	peg.754	CDS	LMR001-002	697176	696928	249	Lipoprotein, VirB7-like	- none -		PEG754	249	778	2017	1296		778	1747.56	550.592	1262.8	507.148	1.16743	664.314	266.793	-0.498854
PEG755	fig|6666666.88372.peg.755	peg.755	CDS	LMR001-002	697441	697322	120	hypothetical protein	- none -		PEG755	119	94	302	226		94	243.137	80.0192	168.555	141.642	1.37146	86.9958	73.1057	-0.23189
PEG756	fig|6666666.88372.peg.756	peg.756	CDS	LMR001-002	697752	697591	162	hypothetical protein	- none -		PEG756	162	166	819	324		166	683.816	119.434	424.887	262.276	2.04278	142.696	88.0842	-0.474609
PEG757	fig|6666666.88372.peg.757	peg.757	CDS	LMR001-002	698003	698167	165	protein of unknown function DUF1328	- none -		PEG757	165	60	184	149		60	141.884	47.3704	100.931	61.1706	1.24218	53.6748	32.5302	-0.340473
PEG758	fig|6666666.88372.peg.758	peg.758	CDS	LMR001-002	698350	698850	501	Putative inner membrane protein (Fragment)	- none -		PEG758	501	3031	5365	4535		3031	4577.89	3064.3	3805.89	759.658	0.593512	3049.1	608.602	0.0143887		S
PEG759	fig|6666666.88372.peg.759	peg.759	CDS	LMR001-002	698903	700141	1239	D-amino acid dehydrogenase small subunit (EC 1.4.99.1)	GABA and putrescine metabolism from cluters, Pyruvate Alanine Serine Interconversions, Respiratory dehydrogenases 1		PEG759	1239	5702	7020	8370		5702	6009.92	6193.69	5855.78	472.621	0.0759674	5947.67	480.038	0.119421		E	K00285
PEG760	fig|6666666.88372.peg.760	peg.760	CDS	LMR001-002	700298	700546	249	FIG01075821: hypothetical protein	- none -		PEG760	249	482	1631	1238		482	1414.97	510.601	948.457	380.906	1.55382	496.274	199.307	0.0833199
PEG761	fig|6666666.88372.peg.761	peg.761	CDS	LMR001-002	701144	700581	564	FIG01074392: hypothetical protein	- none -		PEG761	564	256	723	877		256	600.55	324.914	428.204	75.9227	1.23094	290.386	51.4869	0.344711		S	K07507
PEG762	fig|6666666.88372.peg.762	peg.762	CDS	LMR001-002	701357	701512	156	hypothetical protein	- none -		PEG762	79	1	8	36		1	6.6628	7.96874	3.8314	4.84987	2.73613	4.48437	5.67642	2.99435
PEG763	fig|6666666.88372.peg.763	peg.763	CDS	LMR001-002	702013	703155	1143	Fumarylacetoacetate hydrolase family protein	Gentisate degradation, Pterin carbinolamine dehydratase, Salicylate and gentisate catabolism		PEG763	1143	4596	7039	7026		4596	6033.74	5064.12	5312.86	464.817	0.393937	4828.05	422.401	0.141194		R
PEG764	fig|6666666.88372.peg.764	peg.764	CDS	LMR001-002	703261	703638	378	FIG01074358: hypothetical protein	- none -		PEG764	378	635	848	1086		635	707.886	422.359	671.608	177.674	0.156008	528.845	139.906	-0.589038
PEG765	fig|6666666.88372.peg.765	peg.765	CDS	LMR001-002	705906	703690	2217	Isoquinoline 1-oxidoreductase beta subunit (EC 1.3.99.16)	CBSS-314267.3.peg.390, N-heterocyclic aromatic compound degradation		PEG765	2217	12256	7612	14735		12256	6456.25	11474.1	9351.21	421.796	-0.923561	11860.1	534.962	-0.0939518		C	K07303
PEG766	fig|6666666.88372.peg.766	peg.766	CDS	LMR001-002	706368	705910	459	Isoquinoline 1-oxidoreductase alpha subunit (EC 1.3.99.16)	CBSS-314267.3.peg.390, N-heterocyclic aromatic compound degradation		PEG766	458	3273	1871	3648		3273	1611.26	2323.49	2442.34	533.261	-1.0226	2798.45	611.015	-0.494502		C	K07302
PEG767	fig|6666666.88372.peg.767	peg.767	CDS	LMR001-002	707557	706595	963	Transcriptional regulator, AraC family	- none -		PEG767	963	1919	1301	2651		1919	1151.65	1528.99	1535.16	159.414	-0.736408	1723.83	179.006	-0.327523		K
PEG768	fig|6666666.88372.peg.768	peg.768	CDS	LMR001-004	1408	146	1263	MISCELLANEOUS; Not classified regulator	- none -		PEG768	1263	384	410	1458		384	353.826	658.349	368.766	29.1977	-0.116967	521.028	41.2532	0.778847		T
PEG769	fig|6666666.88372.peg.769	peg.769	CDS	LMR001-004	2169	1474	696	MISCELLANEOUS; Not classified regulator	- none -		PEG769	696	344	448	940		344	380.184	356.348	362.267	52.0499	0.142823	350.349	50.3375	0.049412		TK
PEG770	fig|6666666.88372.peg.770	peg.770	CDS	LMR001-004	2858	2310	549	hypothetical membrane-anchored protein	- none -		PEG770	543	220	418	618		220	359.697	235.456	289.742	53.3594	0.710683	227.621	41.9191	0.0993577		UNTP
PEG771	fig|6666666.88372.peg.771	peg.771	CDS	LMR001-004	4037	3042	996	transcriptional regulator	- none -		PEG771	986	365	1307	1178		365	1155.79	471.396	760.273	77.1068	1.66389	418.075	42.4011	0.370016		K	K02529
PEG772	fig|6666666.88372.peg.772	peg.772	CDS	LMR001-004	4218	5168	951	Inositol transport system sugar-binding protein	Inositol catabolism		PEG772	951	683	536	1250		683	445.499	518.523	563.919	59.2974	-0.615067	600.431	63.1368	-0.39608		G	K02058
PEG773	fig|6666666.88372.peg.773	peg.773	CDS	LMR001-004	5296	6417	1122	Inositol transport system permease protein	Inositol catabolism		PEG773	1121	394	386	1263		394	332.361	526.687	362.955	32.3778	-0.243798	460.118	41.0453	0.420397		G	K02057
PEG774	fig|6666666.88372.peg.774	peg.774	CDS	LMR001-004	6417	7205	789	Inositol transport system ATP-binding protein	Inositol catabolism		PEG774	787	271	342	848		271	285.107	312.446	278.063	35.332	0.0731072	291.732	37.0689	0.20521		G	K02056
PEG775	fig|6666666.88372.peg.775	peg.775	CDS	LMR001-004	7292	8086	795	Hydroxypyruvate isomerase (EC 5.3.1.22)	Glycerate metabolism		PEG775	794	318	534	1250		318	444.643	518.523	381.165	48.0057	0.485041	418.105	52.6581	0.706801		G	K01816
PEG776	fig|6666666.88372.peg.776	peg.776	CDS	LMR001-004	8115	8654	540	Myo-inositol 2-dehydrogenase (EC 1.1.1.18)	Inositol catabolism		PEG776	534	135	162	568		135	121.873	214.726	128.385	24.0421	-0.146471	174.811	32.7361	0.670644		R
PEG777	fig|6666666.88372.peg.777	peg.777	CDS	LMR001-004	8630	9133	504	Myo-inositol 2-dehydrogenase (EC 1.1.1.18)	Inositol catabolism		PEG777	503	106	188	509		106	145.442	191.414	125.684	24.9868	0.457399	148.67	29.5566	0.853651		R	K00010
PEG778	fig|6666666.88372.peg.778	peg.778	CDS	LMR001-004	10425	9610	816	3-oxoacyl-[acyl-carrier protein] reductase (EC 1.1.1.100)	CBSS-246196.1.peg.364, Fatty Acid Biosynthesis FASII		PEG778	816	939	1006	1813		939	889.592	950.016	914.658	112.09	-0.079092	944.87	115.793	0.0157156		R
PEG779	fig|6666666.88372.peg.779	peg.779	CDS	LMR001-004	11790	10504	1287	3-oxoacyl-[acyl-carrier-protein] synthase, KASII (EC 2.3.1.179)	- none -		PEG779	1285	878	1011	1895		878	895.255	1008.72	886.128	68.9594	0.02972	942.861	73.3744	0.201877		IQ	K09458
PEG780	fig|6666666.88372.peg.780	peg.780	CDS	LMR001-004	12562	11975	588	Transcriptional regulator, TetR family	- none -		PEG780	588	456	887	1079		456	747.062	418.858	601.549	102.304	0.712076	437.448	74.3959	-0.122688		K	K16137
PEG781	fig|6666666.88372.peg.781	peg.781	CDS	LMR001-004	12662	13768	1107	Cell Processes; Protection responses; drug/analog sensitivity and resistance	- none -		PEG781	1101	198	228	1373		198	182.642	602.415	190.397	17.2931	-0.117597	400.284	36.3564	1.60414		M
PEG782	fig|6666666.88372.peg.782	peg.782	CDS	LMR001-004	13768	16881	3114	Cell Processes; Protection responses; drug/analog sensitivity and resistance	- none -		PEG782	3105	875	1400	4410		875	1222.31	2949.05	1048.65	33.7728	0.482281	1912.02	61.5786	1.75292		V
PEG783	fig|6666666.88372.peg.783	peg.783	CDS	LMR001-004	16957	17214	258	Transcriptional regulator, TetR family	- none -		PEG783	256	251	774	700		251	647.94	266.688	449.564	175.611	1.36709	258.938	101.148	0.0863834
PEG784	fig|6666666.88372.peg.784	peg.784	CDS	LMR001-004	17610	17491	120	hypothetical protein	- none -		PEG784	107	14	26	32		14	18.5097	6.92258	16.2528	15.1895	0.403279	10.4592	9.77498	-1.01562
PEG785	fig|6666666.88372.peg.785	peg.785	CDS	LMR001-004	17622	19211	1590	Exopolyphosphatase (EC 3.6.1.11)	Phosphate metabolism, Polyphosphate		PEG785	1590	4203	8500	7173		4203	7168.7	5182.53	5687.98	357.735	0.768828	4694.9	295.277	0.300773		FP	K01524
PEG786	fig|6666666.88372.peg.786	peg.786	CDS	LMR001-004	19208	19942	735	Heat shock protein FtsJ/RrmJ @ Ribosomal RNA large subunit methyltransferase E (EC 2.1.1.-)	RNA methylation		PEG786	735	1612	3224	2879		1612	2868.72	1713.13	2239.68	304.719	0.832767	1661.89	226.107	0.0889913		J	K02427
PEG787	fig|6666666.88372.peg.787	peg.787	CDS	LMR001-004	19947	20330	384	Lactoylglutathione lyase	- none -		PEG787	384	371	811	882		371	677.789	326.747	524.235	136.52	0.87066	348.714	90.8109	-0.182003		R
PEG788	fig|6666666.88372.peg.788	peg.788	CDS	LMR001-004	21731	20337	1395	MFS permease	- none -		PEG788	1392	683	983	2135		683	861.581	1156.88	771.96	55.4569	0.336499	919.61	66.0639	0.76168		G
PEG789	fig|6666666.88372.peg.789	peg.789	CDS	LMR001-004	21865	21746	120	hypothetical protein	- none -		PEG789	120	10	12	82		10	9.30728	22.0845	9.65364	8.0447	-0.103568	16.0422	13.3685	1.14303
PEG790	fig|6666666.88372.peg.790	peg.790	CDS	LMR001-004	21928	22911	984	Metallo-beta-lactamase family protein	- none -		PEG790	984	2678	8601	5425		2678	7270	3769.18	4974.58	505.547	1.44017	3224.17	327.66	0.492464		R
PEG791	fig|6666666.88372.peg.791	peg.791	CDS	LMR001-004	23193	24695	1503	Inosine-5'-monophosphate dehydrogenase (EC 1.1.1.205)	Purine conversions, Purine salvage cluster		PEG791	1503	8203	24382	11523		8203	18172.2	8948.47	13187.8	877.434	1.14742	8575.99	570.592	0.125399		FR	K00088
PEG792	fig|6666666.88372.peg.792	peg.792	CDS	LMR001-004	24984	25859	876	Dienelactone hydrolase family	- none -		PEG792	876	664	2076	1624		664	1805.65	788.134	1234.69	140.947	1.44382	725.939	82.8697	0.247816		Q	K01061
PEG793	fig|6666666.88372.peg.793	peg.793	CDS	LMR001-004	26894	25929	966	FIG049039: Transcriptional regulator, LysR family	- none -		PEG793	964	4641	5440	7683		4641	4645.78	5600.1	4645.47	481.895	0.000195757	5122.63	531.393	0.269728		K
PEG794	fig|6666666.88372.peg.794	peg.794	CDS	LMR001-004	27088	27384	297	FIG00986822: hypothetical protein	- none -		PEG794	297	9592	1955	15469		9592	1684.58	12068	5639.29	1898.75	-2.50974	10831	3646.81	0.330984
PEG795	fig|6666666.88372.peg.795	peg.795	CDS	LMR001-004	27368	27496	129	hypothetical protein	- none -		PEG795	129	2005	226	3268		2005	180.723	2047.97	1092.6	846.975	-3.47137	2026.22	1570.71	0.0309704
PEG796	fig|6666666.88372.peg.796	peg.796	CDS	LMR001-004	28562	27744	819	FIG00983684: hypothetical protein	- none -		PEG796	819	7552	6363	10115		7552	5497.28	7754.39	6524.1	796.593	-0.457935	7652.66	934.39	0.0383607		S
PEG797	fig|6666666.88372.peg.797	peg.797	CDS	LMR001-004	30056	28683	1374	Glutamate--cysteine ligase (EC 6.3.2.2)	Glutathione: Biosynthesis and gamma-glutamyl cycle		PEG797	1374	7442	4785	9841		7442	4078.72	7510.73	5763.02	419.434	-0.868605	7479.03	544.325	0.0122322		H	K01919
PEG798	fig|6666666.88372.peg.798	peg.798	CDS	LMR001-004	30938	30201	738	Ribosomal RNA small subunit methyltransferase E (EC 2.1.1.-)	Cluster containing Glutathione synthetase, Heat shock dnaK gene cluster extended, RNA methylation		PEG798	738	850	796	1945		850	665.967	1038.91	757.574	102.652	-0.350622	944.043	127.919	0.290921		S	K09761
PEG799	fig|6666666.88372.peg.799	peg.799	CDS	LMR001-004	32452	30947	1506	Probable low-affinity inorganic phosphate transporter	Phosphate metabolism		PEG799	1504	1493	1703	3317		1493	1476.28	2086.55	1484.54	98.7059	-0.0160497	1789.67	118.994	0.483102		P	K03306
PEG800	fig|6666666.88372.peg.800	peg.800	CDS	LMR001-004	33088	32582	507	NUDIX hydrolase	- none -		PEG800	507	3333	2902	3909		3333	2540.86	2534.02	2937.56	579.401	-0.392051	2934.14	578.726	-0.395942		LR
PEG801	fig|6666666.88372.peg.801	peg.801	CDS	LMR001-004	34224	33400	825	Glycolate utilization operon transcriptional activator GlcC	Glycolate, glyoxylate interconversions		PEG801	825	1728	1194	2186		1728	1086.78	1199.73	1408.3	170.703	-0.670554	1464.78	177.549	-0.527904		K	K05799
PEG802	fig|6666666.88372.peg.802	peg.802	CDS	LMR001-004	34402	35688	1287	Mlr6914 protein	- none -		PEG802	1287	6676	2764	9550		6676	2403.88	7253.61	4543.66	353.043	-1.47522	6968.52	541.455	0.118108		S
PEG803	fig|6666666.88372.peg.803	peg.803	CDS	LMR001-004	36605	35706	900	Transcriptional regulator, LysR family, in glycolate utilization operon	Glycolate, glyoxylate interconversions		PEG803	896	840	901	2139		840	763.517	1160.43	801.489	89.4519	-0.136801	999.945	111.601	0.467125		K
PEG804	fig|6666666.88372.peg.804	peg.804	CDS	LMR001-004	36713	38152	1440	Glycolate dehydrogenase (EC 1.1.99.14), subunit GlcD	Glycolate, glyoxylate interconversions, Photorespiration (oxidative C2 cycle)		PEG804	1440	3511	3353	5412		3511	2971.82	3758.73	3239.67	224.977	-0.239103	3633.13	252.3	0.0997958		C	K00104
PEG805	fig|6666666.88372.peg.805	peg.805	CDS	LMR001-004	38149	39360	1212	Glycolate dehydrogenase (EC 1.1.99.14), FAD-binding subunit GlcE	Glycolate, glyoxylate interconversions, Photorespiration (oxidative C2 cycle)		PEG805	1212	1846	1505	2702		1846	1305.25	1571.49	1575.13	129.961	-0.49931	1708.25	140.945	-0.2315		C	K11472
PEG806	fig|6666666.88372.peg.806	peg.806	CDS	LMR001-004	39442	39822	381	Probable transmembrane protein	- none -		PEG806	381	655	753	891		655	629.02	331.467	641.828	168.459	-0.0575879	493.051	129.41	-0.98183		S
PEG807	fig|6666666.88372.peg.807	peg.807	CDS	LMR001-004	39903	41195	1293	Glycolate dehydrogenase (EC 1.1.99.14), iron-sulfur subunit GlcF	Glycolate, glyoxylate interconversions, Photorespiration (oxidative C2 cycle)		PEG807	1293	1903	1852	2909		1903	1597.12	1742.24	1749.1	135.275	-0.251343	1821.66	140.886	-0.125875		C	K11473
PEG808	fig|6666666.88372.peg.808	peg.808	CDS	LMR001-004	42011	41319	693	ErfK/YbiS/YcfS/YnhG	- none -		PEG808	693	5229	3683	7801		5229	3222.47	5690.55	4223.22	609.411	-0.696977	5457.26	787.483	0.123425		S
PEG809	fig|6666666.88372.peg.809	peg.809	CDS	LMR001-004	42950	42204	747	Uncharacterized protein, possibly including a L,D-transpeptidase domain	- none -		PEG809	747	5390	4968	7604		5390	4226.77	5527.01	4810.94	644.035	-0.352094	5461.06	731.066	0.0348486		S
PEG810	fig|6666666.88372.peg.810	peg.810	CDS	LMR001-004	43254	43889	636	DNA-3-methyladenine glycosylase (EC 3.2.2.20)	DNA Repair Base Excision		PEG810	635	1738	1862	2254		1738	1604.07	1256.8	1670.94	263.139	-0.115526	1497.3	235.795	-0.46751		L	K01246
PEG811	fig|6666666.88372.peg.811	peg.811	CDS	LMR001-004	44341	43955	387	putative exported protein	- none -		PEG811	387	812	2204	1405		812	1928.82	624.2	1370.83	354.219	1.24669	718.515	185.663	-0.380946		S
PEG812	fig|6666666.88372.peg.812	peg.812	CDS	LMR001-004	44322	44483	162	hypothetical protein	- none -		PEG812	162	76	249	147		76	200.602	46.4997	138.317	85.381	1.39965	61.2662	37.8186	-0.709397
PEG813	fig|6666666.88372.peg.813	peg.813	CDS	LMR001-004	44905	44480	426	hypothetical protein	- none -		PEG813	426	417	880	904		417	738.416	337.528	577.643	135.597	0.824839	377.198	88.5442	-0.30459
PEG814	fig|6666666.88372.peg.814	peg.814	CDS	LMR001-004	45208	44930	279	HYPOTHETICAL/UNKNOWN PROTEIN	- none -		PEG814	279	380	508	602		380	426.161	229.213	403.175	144.507	0.164679	304.701	109.212	-0.730029
PEG815	fig|6666666.88372.peg.815	peg.815	CDS	LMR001-004	45614	45489	126	hypothetical protein	- none -		PEG815	126	13	60	63		13	42.5173	15.7369	27.7595	22.0314	1.70935	14.3693	11.4042	0.275452
PEG816	fig|6666666.88372.peg.816	peg.816	CDS	LMR001-004	45580	47094	1515	Histidyl-tRNA synthetase (EC 6.1.1.21)	tRNA aminoacylation, His		PEG816	1515	6163	12529	9991		6163	10291.7	7652.24	8228.83	543.157	0.739087	6909.09	456.046	0.311558		J	K01892
PEG817	fig|6666666.88372.peg.817	peg.817	CDS	LMR001-004	47094	48236	1143	ATP phosphoribosyltransferase regulatory subunit (EC 2.4.2.17)	Histidine Biosynthesis		PEG817	1143	2306	4495	3981		2306	3837.42	2592.25	3072.08	268.774	0.734275	2449.5	214.304	0.168345		E	K02502
PEG818	fig|6666666.88372.peg.818	peg.818	CDS	LMR001-004	48233	48928	696	ATP phosphoribosyltransferase (EC 2.4.2.17)	Histidine Biosynthesis, Riboflavin synthesis cluster		PEG818	696	594	1122	1229		594	1022.51	504.802	808.4	116.149	0.782868	549.547	78.9579	-0.235455		E	K00765
PEG819	fig|6666666.88372.peg.819	peg.819	CDS	LMR001-004	49046	49753	708	Glutathione S-transferase (EC 2.5.1.18)	Glutathione: Non-redox reactions		PEG819	708	4859	3845	6929		4859	3347.13	4986.15	4105.6	579.887	-0.539241	4925.11	695.637	0.0357613		O	K00799
PEG820	fig|6666666.88372.peg.820	peg.820	CDS	LMR001-004	49830	51056	1227	Ferredoxin reductase	Anaerobic respiratory reductases		PEG820	1227	5282	4537	7370		5282	3872.32	5330.67	4578.39	373.137	-0.448554	5307.56	432.564	0.0125635		C	K00529
PEG821	fig|6666666.88372.peg.821	peg.821	CDS	LMR001-004	51248	54040	2793	diguanylate cyclase/phosphodiesterase (GGDEF & EAL domains) with PAS/PAC sensor(s)	Bacterial hemoglobins		PEG821	2793	7018	5369	10289		7018	4577.89	7898.17	5796.22	207.527	-0.61567	7456.36	266.966	0.171168		KT
PEG822	fig|6666666.88372.peg.822	peg.822	CDS	LMR001-004	56045	54408	1638	Heat shock protein 60 family chaperone GroEL	GroEL GroES		PEG822	1638	956854	308712	836550		956854	153615	817815	555404	33907.5	-2.6395	887504	54182.2	-0.227038		O	K04077
PEG823	fig|6666666.88372.peg.823	peg.823	CDS	LMR001-004	56418	56122	297	Heat shock protein 60 family co-chaperone GroES	GroEL GroES		PEG823	297	156785	51695	138346		156785	33965.2	125887	95320.1	32094.3	-2.20565	141281	47569.4	-0.315648		O	K04078
PEG824	fig|6666666.88372.peg.824	peg.824	CDS	LMR001-004	56835	57683	849	HAD superfamily protein involved in N-acetyl-glucosamine catabolism	- none -		PEG824	849	3080	4723	4898		3080	4023.97	3353.6	3553.58	418.561	0.384197	3218.39	379.08	0.121287		G
PEG825	fig|6666666.88372.peg.825	peg.825	CDS	LMR001-004	57697	58680	984	Riboflavin kinase (EC 2.7.1.26) / FMN adenylyltransferase (EC 2.7.7.2)	Riboflavin, FMN and FAD metabolism, Riboflavin, FMN and FAD metabolism, Riboflavin, FMN and FAD metabolism in plants, Riboflavin, FMN and FAD metabolism in plants, riboflavin to FAD, riboflavin to FAD		PEG825	984	2207	3048	3960		2207	2699.65	2577.77	2453.83	249.373	0.290029	2392.89	243.18	0.223381		H	K11753
PEG826	fig|6666666.88372.peg.826	peg.826	CDS	LMR001-004	58918	58745	174	hypothetical protein	- none -		PEG826	174	200	479	574		200	402.866	217.464	301.426	173.233	1.0104	208.725	119.957	0.120875
PEG827	fig|6666666.88372.peg.827	peg.827	CDS	LMR001-004	58958	61867	2910	Isoleucyl-tRNA synthetase (EC 6.1.1.5)	tRNA aminoacylation, Ile		PEG827	2907	9744	26528	16597		9744	19484.4	13018.7	14617.1	502.825	0.998858	11384.3	391.617	0.417129		J	K01870
PEG828	fig|6666666.88372.peg.828	peg.828	CDS	LMR001-004	62001	62621	621	FIG00983508: hypothetical protein	- none -		PEG828	621	4015	5756	6162		4015	4941.48	4361.22	4479.7	721.368	0.2985	4189.57	674.648	0.118288
PEG829	fig|6666666.88372.peg.829	peg.829	CDS	LMR001-004	62645	63124	480	Histone acetyltransferase HPA2 and related acetyltransferases	CBSS-216591.1.peg.168		PEG829	480	1293	2043	1960		1293	1771.36	1047.2	1532.78	319.329	0.452805	1170.7	243.896	-0.305515		R
PEG830	fig|6666666.88372.peg.830	peg.830	CDS	LMR001-004	63577	63128	450	tRNA-specific adenosine-34 deaminase (EC 3.5.4.-)	tRNA modification Bacteria, tRNA processing		PEG830	447	470	951	1168		470	821.783	465.356	645.839	144.483	0.806422	467.625	104.614	-0.0140014		FJ	K11991
PEG831	fig|6666666.88372.peg.831	peg.831	CDS	LMR001-004	63650	65353	1704	Ribosomal large subunit pseudouridine synthase B (EC 4.2.1.70)	CBSS-314276.3.peg.1499, RNA pseudouridine syntheses, Ribosome post-transcriptional modification and chromosomal segregation cluster		PEG831	1704	5188	10141	9184		5188	8563.35	6932.92	6875.67	403.502	0.722997	6060.46	355.661	0.418284		J	K06178
PEG832	fig|6666666.88372.peg.832	peg.832	CDS	LMR001-004	65360	65920	561	16S rRNA (guanine(966)-N(2))-methyltransferase (EC 2.1.1.171)	CBSS-266117.6.peg.1260, CBSS-269801.1.peg.1715, RNA methylation		PEG832	561	691	1484	1230		691	1285.16	504.802	987.699	176.06	0.896776	597.521	106.51	-0.45138		L	K08316
PEG833	fig|6666666.88372.peg.833	peg.833	CDS	LMR001-004	66077	66961	885	SERINE PROTEASE (EC 3.4.21.-)	- none -		PEG833	885	987	1125	2274		987	1024.8	1274.17	1005.54	113.62	0.0552684	1130.23	127.709	0.369493		R	K07001
PEG834	fig|6666666.88372.peg.834	peg.834	CDS	LMR001-004	68822	66963	1860	putative Glutathione-regulated potassium-efflux system protein KefB	Potassium homeostasis		PEG834	1860	6077	4979	9995		6077	4236.31	7652.24	5158.83	277.357	-0.521583	6866.79	369.182	0.33149		P	K03455
PEG835	fig|6666666.88372.peg.835	peg.835	CDS	LMR001-004	68968	70314	1347	TldE protein, part of TldE/TldD proteolytic complex	Putative TldE-TldD proteolytic complex		PEG835	1347	4729	5304	7706		4729	4521.45	5614.72	4626.48	343.466	-0.0655146	5173.12	384.047	0.246912		R	K03592
PEG836	fig|6666666.88372.peg.836	peg.836	CDS	LMR001-004	70382	71194	813	FIG043197: Inositol monophosphatase family protein	- none -		PEG836	813	1576	2440	3226		1576	2126.68	2019.22	1852.15	227.816	0.430861	1798.41	221.207	0.356055		G	K01092
PEG837	fig|6666666.88372.peg.837	peg.837	CDS	LMR001-004	71252	71488	237	Uncharacterized protein, Bsl7517 homolog	- none -		PEG837	237	1301	2651	2257		1301	2300.68	1261.18	1800.42	759.672	0.823358	1280.67	540.369	-0.0439255
PEG838	fig|6666666.88372.peg.838	peg.838	CDS	LMR001-004	71526	72839	1314	Lipid IVA 3-deoxy-D-manno-octulosonic acid transferase (EC 2.4.99.12) [often with (EC 2.4.99.13) also]	- none -		PEG838	1314	2757	4335	5048		2757	3708.25	3464.21	3231.24	245.909	0.429091	3109.22	236.623	0.330879		M	K02527
PEG839	fig|6666666.88372.peg.839	peg.839	CDS	LMR001-004	72849	73556	708	Hydrolase, haloacid dehalogenase-like family	- none -		PEG839	708	3220	2231	3944		3220	1950.15	2563	2585.61	365.199	-0.723951	2892.04	408.48	-0.329705		R	K01091
PEG840	fig|6666666.88372.peg.840	peg.840	CDS	LMR001-004	73690	74730	1041	Tetraacyldisaccharide 4'-kinase (EC 2.7.1.130)	- none -		PEG840	1041	1381	1891	2931		1381	1629.86	1760.23	1505.12	144.584	0.239679	1570.31	150.846	0.350693		M	K00912
PEG841	fig|6666666.88372.peg.841	peg.841	CDS	LMR001-004	74966	74733	234	FIG00450333: hypothetical protein	- none -		PEG841	234	1015	1297	1444		1015	1149.61	649.689	1081.76	462.291	0.181213	831.8	355.47	-0.642109		S
PEG842	fig|6666666.88372.peg.842	peg.842	CDS	LMR001-004	76874	75060	1815	DNA mismatch repair protein MutL	DNA repair, bacterial MutL-MutS system		PEG842	1804	2847	4618	5539		2847	3934.16	3864.08	3389.31	187.878	0.467901	3354.27	185.935	0.441968		L	K03572
PEG843	fig|6666666.88372.peg.843	peg.843	CDS	LMR001-004	76860	77006	147	hypothetical protein	- none -		PEG843	129	9	16	119		9	11.8901	35.1746	10.4426	8.09501	0.402575	22.0848	17.12	1.96734
PEG844	fig|6666666.88372.peg.844	peg.844	CDS	LMR001-004	77269	78990	1722	Two component sensor kinase	- none -		PEG844	1722	1715	983	3319		1715	861.581	2086.55	1287.77	74.7833	-0.992273	1900.25	110.351	0.283786		T
PEG845	fig|6666666.88372.peg.845	peg.845	CDS	LMR001-004	79350	80699	1350	diguanylate cyclase/phosphodiesterase (GGDEF & EAL domains) with PAS/PAC sensor(s)	Bacterial hemoglobins		PEG845	1350	5119	3355	7861		5119	2977.23	5736.42	4047.02	299.779	-0.781278	5426.62	401.972	0.164904		T
PEG846	fig|6666666.88372.peg.846	peg.846	CDS	LMR001-004	81687	80758	930	Glycine cleavage system transcriptional activator	Orphan regulatory proteins		PEG846	929	477	583	1289		477	481.649	544.495	479.589	51.6242	0.0123924	511.012	55.0067	0.18933		K
PEG847	fig|6666666.88372.peg.847	peg.847	CDS	LMR001-004	81777	83321	1545	Trimethylamine methyltransferase family protein	- none -		PEG847	1543	277	501	2312		277	420.918	1302.62	348.806	22.6057	0.605248	789.657	51.1768	2.23505		H	K14083
PEG848	fig|6666666.88372.peg.848	peg.848	CDS	LMR001-004	84125	83445	681	HYPOTHETICAL TRANSMEMBRANE SIGNAL PEPTIDE PROTEIN	- none -		PEG848	681	1930	17671	4512		1930	13826.4	3037.72	7879.16	1157	2.83928	2484.85	364.882	0.652919
PEG849	fig|6666666.88372.peg.849	peg.849	CDS	LMR001-004	84225	84371	147	hypothetical protein	- none -		PEG849	147	110	103	193		110	74.4641	66.5143	92.1824	62.7091	-0.561582	88.2075	60.0051	-0.724462
PEG850	fig|6666666.88372.peg.850	peg.850	CDS	LMR001-004	86115	84391	1725	Galactonate dehydratase (EC 4.2.1.6)	D-galactonate catabolism, Muconate lactonizing enzyme family		PEG850	1725	8631	7124	8921		8631	6096.88	6689.95	7363.33	426.86	-0.501253	7659.87	444.05	-0.367328		EG	K01687
PEG851	fig|6666666.88372.peg.851	peg.851	CDS	LMR001-004	86080	86193	114	hypothetical protein	- none -		PEG851	114	97	67	91		97	47.8255	25.1635	72.4383	63.5423	-1.02096	61.1072	53.6028	-1.94741
PEG852	fig|6666666.88372.peg.852	peg.852	CDS	LMR001-004	87084	86200	885	1,4-lactonase (EC 3.1.1.25)	- none -		PEG852	885	1837	1324	2824		1837	1168.78	1668.9	1502.66	169.792	-0.651987	1752.72	198.047	-0.138094		G
PEG853	fig|6666666.88372.peg.853	peg.853	CDS	LMR001-004	87719	87081	639	2-dehydro-3-deoxyphosphogalactonate aldolase (EC 4.1.2.21)	D-galactonate catabolism		PEG853	639	1002	746	1520		1002	622.622	701.511	812.464	127.146	-0.686894	851.908	133.319	-0.514785		G	K01631
PEG854	fig|6666666.88372.peg.854	peg.854	CDS	LMR001-004	88651	87734	918	2-dehydro-3-deoxygalactonokinase (EC 2.7.1.58)	D-galactonate catabolism		PEG854	917	1850	1531	2566		1850	1326.51	1468.37	1587.89	173.162	-0.479315	1658.82	180.896	-0.332738		G	K00883
PEG855	fig|6666666.88372.peg.855	peg.855	CDS	LMR001-004	89421	88651	771	3-oxoacyl-[acyl-carrier protein] reductase (EC 1.1.1.100)	CBSS-246196.1.peg.364, Fatty Acid Biosynthesis FASII		PEG855	771	1463	1682	2325		1463	1460.34	1310.48	1461.26	189.528	-0.00181191	1386.33	179.809	-0.158018		IQR
PEG856	fig|6666666.88372.peg.856	peg.856	CDS	LMR001-004	89541	90368	828	D-galactonate regulator, IclR family	D-galactonate catabolism		PEG856	827	1267	1339	1879		1267	1179.87	997.451	1223.76	147.976	-0.103529	1132.55	136.947	-0.345841		K
PEG857	fig|6666666.88372.peg.857	peg.857	CDS	LMR001-004	90586	91326	741	regulatory protein, LuxR	- none -		PEG857	741	2603	2748	3494		2603	2386.91	2207.48	2493.54	336.51	-0.123453	2403.82	324.402	-0.236199		K
PEG858	fig|6666666.88372.peg.858	peg.858	CDS	LMR001-004	91409	91531	123	hypothetical protein	- none -		PEG858	123	60	68	101		60	48.6685	28.5909	54.3238	44.1657	-0.301473	44.285	36.0041	-1.06891
PEG859	fig|6666666.88372.peg.859	peg.859	CDS	LMR001-004	91519	92274	756	FIG01074200: hypothetical protein	- none -		PEG859	756	6201	8506	9788		6201	7184.85	7470.57	6689.63	884.872	0.213991	6832.49	903.769	0.270252		K
PEG860	fig|6666666.88372.peg.860	peg.860	CDS	LMR001-004	92879	94024	1146	Scaffold protein for [4Fe-4S] cluster assembly ApbC, MRP-like	Iron-sulfur cluster assembly, Scaffold proteins for [4Fe-4S] cluster assembly (MRP family)		PEG860	1146	6467	6287	8242		6467	5421.93	6073.16	5946.68	518.907	-0.255276	6272.29	547.321	-0.091636		D	K03593
PEG861	fig|6666666.88372.peg.861	peg.861	CDS	LMR001-004	94399	94274	126	hypothetical protein	- none -		PEG861	126	251	1062	440		251	955.076	163.809	603.132	478.676	1.92684	207.499	164.682	-0.616759
PEG862	fig|6666666.88372.peg.862	peg.862	CDS	LMR001-004	94400	95377	978	Magnesium and cobalt transport protein CorA	Magnesium transport		PEG862	978	1809	5028	3159		1809	4274.66	1966.53	3040.92	310.932	1.24207	1886.85	192.93	0.121914		P	K03284
PEG863	fig|6666666.88372.peg.863	peg.863	CDS	LMR001-004	95395	97296	1902	Kup system potassium uptake protein	Potassium homeostasis		PEG863	1902	1587	3190	3820		1587	2842.41	2461.26	2215.48	116.481	0.839405	2024.91	106.462	0.631692		P	K03549
PEG864	fig|6666666.88372.peg.864	peg.864	CDS	LMR001-004	97503	98678	1176	Mlr7408 protein	- none -		PEG864	1176	6664	4142	7388		6664	3567.92	5358.09	5118	435.204	-0.902184	6013.08	511.316	-0.315549		M
PEG865	fig|6666666.88372.peg.865	peg.865	CDS	LMR001-004	98961	99320	360	ATP synthase protein I	- none -		PEG865	360	4234	12180	7341		4234	10062.5	5317.06	7149.46	1985.96	1.24807	4776.74	1326.87	0.327779		S	K02116
PEG866	fig|6666666.88372.peg.866	peg.866	CDS	LMR001-004	99381	100133	753	ATP synthase F0 sector subunit a	- none -		PEG866	753	5657	16077	12326		5657	12713.7	9574.98	9188.06	1220.19	1.1669	7618.69	1011.78	0.757858		C	K02108
PEG867	fig|6666666.88372.peg.867	peg.867	CDS	LMR001-004	100217	100444	228	ATP synthase F0 sector subunit c	- none -		PEG867	228	15968	36169	24455		15968	25235.9	19757.8	20597.4	9033.93	0.661127	17858.3	7832.58	0.30807			K02110
PEG868	fig|6666666.88372.peg.868	peg.868	CDS	LMR001-004	100514	101131	618	ATP synthase B' chain (EC 3.6.3.14)	- none -		PEG868	618	21682	51529	31232		21682	33901.7	25793	27789.4	4496.66	0.645191	23735	3840.62	0.250812		C	K02109
PEG869	fig|6666666.88372.peg.869	peg.869	CDS	LMR001-004	101145	101630	486	ATP synthase F0 sector subunit b	- none -		PEG869	486	11198	25785	16639		11198	19008.5	13051.1	15101.4	3107.29	0.76387	12122.7	2494.39	0.221392		C	K02109
PEG870	fig|6666666.88372.peg.870	peg.870	CDS	LMR001-004	102690	102040	651	Ribonuclease HII (EC 3.1.26.4)	Conserved gene cluster associated with Met-tRNA formyltransferase, Ribonuclease H, Ribonucleases in Bacillus		PEG870	651	1435	2163	2290		1435	1891.84	1286.35	1663.66	255.555	0.398247	1360.92	209.051	-0.158258		L	K03470
PEG871	fig|6666666.88372.peg.871	peg.871	CDS	LMR001-004	102944	102822	123	hypothetical protein	- none -		PEG871	123	99	83	184		99	60.044	62.6001	79.5636	64.6859	-0.72262	80.8417	65.7249	-0.662475
PEG872	fig|6666666.88372.peg.872	peg.872	CDS	LMR001-004	104140	102983	1158	Radical SAM domain protein	- none -		PEG872	1158	3010	3823	4109		3010	3327.28	2696.39	3170.14	273.76	0.143139	2854.7	246.52	-0.160173		L
PEG873	fig|6666666.88372.peg.873	peg.873	CDS	LMR001-004	104307	104840	534	FIG046685: Glycosyltransferase	- none -		PEG873	530	1107	2182	1895		1107	1909.69	1008.72	1508.16	284.558	0.787175	1057.67	199.561	-0.133638		M
PEG874	fig|6666666.88372.peg.874	peg.874	CDS	LMR001-004	105682	105140	543	Molybdenum cofactor biosynthesis protein MoaB	Molybdenum cofactor biosynthesis, ar-104-EC Molybdenum cofactor biosynthesis moaABCDE		PEG874	543	1220	1686	2475		1220	1463.46	1411.24	1341.22	247.003	0.263697	1315.11	242.194	0.211276		H	K03638
PEG875	fig|6666666.88372.peg.875	peg.875	CDS	LMR001-004	106599	105688	912	4-diphosphocytidyl-2-C-methyl-D-erythritol kinase (EC 2.7.1.148)	A Gammaproteobacteria Cluster Relating to Translation, Isoprenoid Biosynthesis, Nonmevalonate Branch of Isoprenoid Biosynthesis		PEG875	912	1632	2067	3270		1632	1795.81	2053.55	1714.43	187.986	0.137061	1843.3	202.116	0.33055		I	K00919
PEG876	fig|6666666.88372.peg.876	peg.876	CDS	LMR001-004	108439	106607	1833	FIG140336: TPR domain protein	- none -		PEG876	1833	32148	33248	38607		32148	23548.1	32417.8	27842.4	1518.95	-0.448604	32277.2	1760.89	0.012568		R
PEG877	fig|6666666.88372.peg.877	peg.877	CDS	LMR001-004	109620	108604	1017	Dimethylallyltransferase (EC 2.5.1.1) / Geranyltranstransferase (farnesyldiphosphate synthase) (EC 2.5.1.10) / Geranylgeranyl pyrophosphate synthetase (EC 2.5.1.29)	Isoprenoid Biosynthesis, Isoprenoinds for Quinones		PEG877	1017	12873	10497	15854		12873	8846.35	12398.2	10864.4	1068.28	-0.542257	12640.3	1242.9	-0.0552855		H	K02523
PEG878	fig|6666666.88372.peg.878	peg.878	CDS	LMR001-004	109733	109954	222	FIG00986291: hypothetical protein	- none -		PEG878	222	634	899	665		634	761.153	254.506	697.511	314.194	0.264	444.188	200.085	-1.31649
PEG879	fig|6666666.88372.peg.879	peg.879	CDS	LMR001-004	109989	110762	774	tRNA (adenine37-N(6))-methyltransferase TrmN6 (EC 2.1.1.223)	RNA methylation		PEG879	774	797	843	1430		797	704.516	639.124	750.338	96.9428	-0.176425	717.642	92.7186	-0.316961		R
PEG880	fig|6666666.88372.peg.880	peg.880	CDS	LMR001-004	110839	111705	867	macromolecule metabolism; macromolecule degradation; degradation of proteins, peptides, glycopeptides	CBSS-316057.3.peg.1308		PEG880	867	9723	4687	11366		9723	3996.88	8821.33	6862.18	791.485	-1.28319	9274.4	1069.71	-0.141069		OU
PEG881	fig|6666666.88372.peg.881	peg.881	CDS	LMR001-004	111795	111986	192	FIG038675: hypothetical protein	- none -		PEG881	192	845	474	1044		845	399.503	404.254	622.391	324.162	-1.08122	624.766	325.399	-1.06417
PEG882	fig|6666666.88372.peg.882	peg.882	CDS	LMR001-004	112049	113050	1002	Glycyl-tRNA synthetase alpha chain (EC 6.1.1.14)	CBSS-349161.4.peg.2427, Glycyl-tRNA synthetase, Glycyl-tRNA synthetase containing cluster, tRNA aminoacylation, Gly		PEG882	1002	4086	7351	6794		4086	6260.55	4868.84	5171.87	516.155	0.616592	4476.02	446.708	0.253879		J	K01878
PEG883	fig|6666666.88372.peg.883	peg.883	CDS	LMR001-004	113269	113445	177	hypothetical protein	- none -		PEG883	171	33	94	88		33	67.6397	24.1044	50.3383	29.4376	1.03379	28.5707	16.708	-0.454783
PEG884	fig|6666666.88372.peg.884	peg.884	CDS	LMR001-004	113611	114159	549	LemA protein	- none -		PEG884	549	4061	2135	3991		4061	1864.6	2599.5	2964.52	539.985	-1.12419	3331.97	606.916	-0.644818		S	K03744
PEG885	fig|6666666.88372.peg.885	peg.885	CDS	LMR001-004	114262	116232	1971	Putative membrane protein precursor	- none -		PEG885	1971	5470	3052	7176		5470	2707.86	5182.53	4089.01	207.459	-1.01443	5326.34	270.236	-0.0779271		S
PEG886	fig|6666666.88372.peg.886	peg.886	CDS	LMR001-004	116326	118491	2166	Glycyl-tRNA synthetase beta chain (EC 6.1.1.14)	CBSS-349161.4.peg.2427, Glycyl-tRNA synthetase, Glycyl-tRNA synthetase containing cluster, tRNA aminoacylation, Gly		PEG886	2166	7977	14546	11936		7977	11666	9267.66	9822.95	453.507	0.547854	8623.8	398.144	0.215826		J	K01879
PEG887	fig|6666666.88372.peg.887	peg.887	CDS	LMR001-004	118554	119414	861	Transcriptional regulator, AraC family	- none -		PEG887	861	812	1345	1768		812	1184.27	915.057	998.549	115.976	0.54297	863.944	100.342	0.170907		K
PEG888	fig|6666666.88372.peg.888	peg.888	CDS	LMR001-004	119504	119884	381	Mannose-6-phosphate isomerase (EC 5.3.1.8)	Mannose Metabolism		PEG888	381	331	1855	867		331	1597.12	320.593	964.127	253.052	2.27	325.862	85.5281	-0.0466593		G
PEG889	fig|6666666.88372.peg.889	peg.889	CDS	LMR001-004	119896	120492	597	Transporter, LysE family	- none -		PEG889	596	331	1588	987		331	1378.44	380.433	854.785	143.42	2.05756	355.782	59.695	0.200241		E
PEG890	fig|6666666.88372.peg.890	peg.890	CDS	LMR001-004	120569	120880	312	Purine nucleoside phosphorylase (EC 2.4.2.1)	Adenosyl nucleosidases, Deoxyribose and Deoxynucleoside Catabolism, Purine conversions, pyrimidine conversions		PEG890	312	196	469	669		196	395.21	255.612	295.547	94.7267	1.01262	225.748	72.3553	0.383955		S
PEG891	fig|6666666.88372.peg.891	peg.891	CDS	LMR001-004	121663	121127	537	FIG00985025: hypothetical protein	- none -		PEG891	507	1498	820	2260		1498	685.437	1261.18	1092.56	215.495	-1.12956	1380.43	272.275	-0.249885
PEG892	fig|6666666.88372.peg.892	peg.892	CDS	LMR001-004	123010	121736	1275	Phosphoribosylamine--glycine ligase (EC 6.3.4.13)	De Novo Purine Biosynthesis		PEG892	1275	1537	4054	4031		1537	3506.89	2628.68	2522.52	197.845	1.18899	2083.42	163.405	0.773137		F	K01945
PEG893	fig|6666666.88372.peg.893	peg.893	CDS	LMR001-004	125497	123122	2376	diguanylate cyclase/phosphodiesterase (GGDEF & EAL domains) with PAS/PAC sensor(s)	Bacterial hemoglobins		PEG893	2376	4367	2123	7348		4367	1854.96	5317.06	3110.06	130.895	-1.23464	4841.11	203.75	0.284594		T
PEG894	fig|6666666.88372.peg.894	peg.894	CDS	LMR001-004	126534	125494	1041	Predicted polyamine sensor NspS, involved in biofilm formation	Polyamine Metabolism		PEG894	1041	2551	1603	4314		2551	1391.73	2870.39	1972.22	189.454	-0.875142	2711.55	260.475	0.169222		E	K11069
PEG895	fig|6666666.88372.peg.895	peg.895	CDS	LMR001-004	127832	126636	1197	Major facilitator transporter	- none -		PEG895	1197	2351	2641	3507		2351	2295.69	2218.91	2322.66	194.04	-0.0335052	2284.27	190.833	-0.0825811		P	K08223
PEG896	fig|6666666.88372.peg.896	peg.896	CDS	LMR001-004	127944	128762	819	Transcriptional regulator, AraC family	- none -		PEG896	819	1595	1414	2457		1595	1231.44	1396.9	1413.66	172.608	-0.374	1496.39	182.71	-0.192118		K
PEG897	fig|6666666.88372.peg.897	peg.897	CDS	LMR001-004	128849	129808	960	4-hydroxybenzoate polyprenyltransferase (EC 2.5.1.39)	- none -		PEG897	957	1738	2287	2942		1738	1997.07	1772.42	1867.43	195.134	0.200621	1755.11	183.397	0.0284552		H	K03179
PEG898	fig|6666666.88372.peg.898	peg.898	CDS	LMR001-004	129805	130074	270	hypothetical protein	- none -		PEG898	270	1807	2521	3193		1807	2196.87	1990.44	2002.02	741.49	0.281715	1898.81	703.261	0.13935
PEG899	fig|6666666.88372.peg.899	peg.899	CDS	LMR001-004	130748	130182	567	FIG00984077: hypothetical protein	- none -		PEG899	567	4855	3373	5558		4855	2989.26	3885.23	3921.07	691.547	-0.699054	4369.06	770.557	-0.320843
PEG900	fig|6666666.88372.peg.900	peg.900	CDS	LMR001-004	131071	133380	2310	Flagellar basal-body rod protein FlgF	Flagellum		PEG900	2310	7817	2299	4809		7817	2010.94	3285.73	4913.61	212.71	-1.95861	5551	240.303	-1.25027
PEG901	fig|6666666.88372.peg.901	peg.901	CDS	LMR001-004	133745	133428	318	hypothetical protein	- none -		PEG901	317	177	188	388		177	145.442	143.136	161.227	50.8601	-0.283391	160.073	50.4963	-0.306453		R
PEG902	fig|6666666.88372.peg.902	peg.902	CDS	LMR001-004	134120	134284	165	FIG00985447: hypothetical protein	- none -		PEG902	165	38	34	141		38	24.0446	43.9689	31.0318	18.8071	-0.661006	40.9939	24.8448	0.209765
PEG903	fig|6666666.88372.peg.903	peg.903	CDS	LMR001-004	134274	135782	1509	Acetate permease ActP (cation/acetate symporter)	Pyruvate metabolism II: acetyl-CoA, acetogenesis from pyruvate		PEG903	1509	481	384	1275		481	329.747	536.66	405.293	26.8584	-0.544195	508.749	33.7143	0.158452		ER	K03307
PEG904	fig|6666666.88372.peg.904	peg.904	CDS	LMR001-004	136041	139616	3576	Sensor histidine kinase (EC 2.7.3.-)	- none -		PEG904	3575	1369	1757	5965		1369	1520.2	4212.22	1443.96	40.3906	0.152479	2789.97	78.0412	1.6228		RTE
PEG905	fig|6666666.88372.peg.905	peg.905	CDS	LMR001-004	139588	140241	654	two-component response regulator	- none -		PEG905	652	450	623	1469		450	513.811	664.974	481.795	73.895	0.192018	557.377	85.4873	0.56408		TK
PEG906	fig|6666666.88372.peg.906	peg.906	CDS	LMR001-004	141677	140244	1434	D-2-hydroxyglutarate dehydrogenase	- none -		PEG906	1432	2108	2952	3778		2108	2592.39	2425.75	2350.51	164.142	0.297977	2267.19	158.323	0.202126		C
PEG907	fig|6666666.88372.peg.907	peg.907	CDS	LMR001-004	142697	141723	975	TsaC protein (YrdC domain) required for threonylcarbamoyladenosine t(6)A37 modification in tRNA	- none -		PEG907	975	1221	2408	2378		1221	2103.19	1347.86	1662.5	170.512	0.783572	1284.83	131.778	0.141667		J	K07566
PEG908	fig|6666666.88372.peg.908	peg.908	CDS	LMR001-004	143559	142834	726	FIG01076068: hypothetical protein	- none -		PEG908	726	2472	2289	3983		2472	2001.44	2592.25	2236.58	308.069	-0.304476	2531.99	348.759	0.0686876
PEG909	fig|6666666.88372.peg.909	peg.909	CDS	LMR001-004	143603	143743	141	hypothetical protein	- none -		PEG909	98	10	8	63		10	6.6628	15.7369	8.3314	8.50143	-0.585799	12.8685	13.1311	0.654152
PEG910	fig|6666666.88372.peg.910	peg.910	CDS	LMR001-004	143990	143799	192	hypothetical protein	- none -		PEG910	192	4726	2290	3257		4726	2001.44	2042.04	3361.04	1750.54	-1.23794	3381.34	1761.11	-1.20897
PEG911	fig|6666666.88372.peg.911	peg.911	CDS	LMR001-004	144051	145295	1245	Benzoate 1,2-dioxygenase (EC 1.14.12.10)	- none -		PEG911	1245	56081	15024	27235		56081	11990.3	22226.7	34047.6	2734.74	-2.22625	39165.7	3145.84	-1.33583		PR	K00479
PEG912	fig|6666666.88372.peg.912	peg.912	CDS	LMR001-004	145299	146387	1089	Flavodoxin reductases (ferredoxin-NADPH reductases) family 1	Anaerobic respiratory reductases		PEG912	1089	29763	8229	15343		29763	6945.77	11979.5	18365.5	1686.45	-2.10039	20882.3	1917.57	-1.31403		C
PEG913	fig|6666666.88372.peg.913	peg.913	CDS	LMR001-004	147489	146428	1062	FIG01074039: hypothetical protein	- none -		PEG913	1060	5154	6352	6823		5154	5484.6	4894.94	5318.44	501.74	0.0901731	5023.61	473.926	-0.0739231		M
PEG914	fig|6666666.88372.peg.914	peg.914	CDS	LMR001-004	148655	147666	990	Zinc transport protein ZntB	- none -		PEG914	974	158	269	1505		158	216.226	691.181	187.176	19.2172	0.451479	424.653	43.5989	2.128		P	K16074
PEG915	fig|6666666.88372.peg.915	peg.915	CDS	LMR001-004	148843	150624	1782	Acyl-CoA dehydrogenase (EC 1.3.8.7)	- none -		PEG915	1782	1243	1576	2933		1243	1368.34	1760.23	1305	73.2322	0.14017	1500.94	84.2279	0.503502		I	K00257
PEG916	fig|6666666.88372.peg.916	peg.916	CDS	LMR001-004	150646	151398	753	Enoyl-CoA hydratase (EC 4.2.1.17)	Acetyl-CoA fermentation to Butyrate, Butanol Biosynthesis, Butyrate metabolism cluster, Fatty acid metabolism cluster, Isoleucine degradation, Polyhydroxybutyrate metabolism, Valine degradation		PEG916	753	524	571	1610		524	471.929	774.926	497.765	66.1042	-0.149897	649.263	86.2236	0.565593		I
PEG917	fig|6666666.88372.peg.917	peg.917	CDS	LMR001-004	151701	153797	2097	Methyl-accepting chemotaxis protein	- none -		PEG917	2097	2573	1052	2747		2573	943.687	1605.73	1757.04	83.7883	-1.44561	2088.07	99.5739	-0.678757		NT	K03406
PEG918	fig|6666666.88372.peg.918	peg.918	CDS	LMR001-004	155090	154317	774	Hydroxymethylpyrimidine ABC transporter, transmembrane component	Thiamin biosynthesis		PEG918	774	1529	3016	2536		1529	2661.29	1448.53	2094.43	270.598	0.800891	1488.05	192.254	-0.0766433		P	K02050
PEG919	fig|6666666.88372.peg.919	peg.919	CDS	LMR001-004	155844	155074	771	ABC-type nitrate/sulfonate/bicarbonate transport system, ATPase component	Alkanesulfonate assimilation		PEG919	771	1250	2400	1827		1250	2093.5	962.306	1671.88	216.846	0.74369	1106.28	143.487	-0.37766		P	K02049
PEG920	fig|6666666.88372.peg.920	peg.920	CDS	LMR001-004	156918	155917	1002	Hydroxymethylpyrimidine ABC transporter, substrate-binding component	Thiamin biosynthesis		PEG920	1002	1703	3172	2300		1703	2823.01	1294.57	2262.58	225.807	0.729868	1498.37	149.538	-0.394889		P	K02051
PEG921	fig|6666666.88372.peg.921	peg.921	CDS	LMR001-004	158046	156964	1083	FIG00794837: hypothetical protein	- none -		PEG921	1081	271	1283	937		271	1139.92	355.201	705.469	65.2608	2.07246	313.11	28.9649	0.390243		S	K09788
PEG922	fig|6666666.88372.peg.922	peg.922	CDS	LMR001-004	158160	159059	900	LysR family transcriptional regulator YbhD	LysR-family proteins in Escherichia coli		PEG922	898	503	620	1213		503	511.391	493.625	507.446	56.5084	0.0224331	498.563	55.5192	-0.028578		K
PEG923	fig|6666666.88372.peg.923	peg.923	CDS	LMR001-004	159534	160826	1293	Nitrate ABC transporter, nitrate-binding protein	Nitrate and nitrite ammonification		PEG923	1288	172	229	844		172	183.57	310.862	177.879	13.8104	0.0923569	241.525	18.7519	0.852301		P	K15576
PEG924	fig|6666666.88372.peg.924	peg.924	CDS	LMR001-004	160991	161884	894	Bicarbonate transport system permease protein	CO2 uptake, carboxysome		PEG924	892	219	284	735		219	227.245	276.679	223.011	25.0012	0.0547956	247.728	27.7722	0.338758		P	K15577
PEG925	fig|6666666.88372.peg.925	peg.925	CDS	LMR001-004	161902	162702	801	Nitrate ABC transporter, ATP-binding protein	Nitrate and nitrite ammonification		PEG925	801	265	282	819		265	225.651	301.6	245.25	30.618	-0.231084	283.225	35.3589	0.18746		P	K15578
PEG926	fig|6666666.88372.peg.926	peg.926	CDS	LMR001-004	163208	164287	1080	hypothetical protein	- none -		PEG926	1079	656	993	1710		656	872.617	865.318	764.381	70.8416	0.411333	760.732	70.5034	0.399215		M
PEG927	fig|6666666.88372.peg.927	peg.927	CDS	LMR001-004	165779	164532	1248	macromolecule metabolism; macromolecule synthesis, modification; rna synthesis, modification , dna transcription	CBSS-316057.3.peg.1308, CBSS-316057.3.peg.1308, CBSS-316057.3.peg.1308		PEG927	1248	1418	2724	2929		1418	2363.22	1760.23	1891.14	151.533	0.735819	1589.64	127.375	0.31083		J	K03215
PEG928	fig|6666666.88372.peg.928	peg.928	CDS	LMR001-004	166531	165776	756	RNA binding methyltransferase FtsJ like	tRNA modification Bacteria		PEG928	755	876	1623	1820		876	1407.99	956.192	1142.5	151.324	0.682988	916.597	121.404	0.124723		J	K06442
PEG929	fig|6666666.88372.peg.929	peg.929	CDS	LMR001-004	166774	168696	1923	Methyl-accepting chemotaxis protein	- none -		PEG929	1923	3883	583	2746		3883	481.649	1605.73	2181.58	113.447	-3.01056	2743.62	142.674	-1.27338		NT	K03406
PEG930	fig|6666666.88372.peg.930	peg.930	CDS	LMR001-004	170705	168768	1938	1-deoxy-D-xylulose 5-phosphate synthase (EC 2.2.1.7)	Isoprenoid Biosynthesis, Nonmevalonate Branch of Isoprenoid Biosynthesis, Pyridoxin (Vitamin B6) Biosynthesis, Thiamin biosynthesis		PEG930	1938	11418	16399	16792		11418	12955.2	13179.7	12192	629.102	0.18086	12304.2	634.893	0.205642		HI	K01662
PEG931	fig|6666666.88372.peg.931	peg.931	CDS	LMR001-004	171769	170846	924	PIRIN	- none -		PEG931	924	1552	1470	2493		1552	1273.99	1422.18	1413.19	152.942	-0.285134	1487.28	160.961	-0.126386		R	K06911
PEG932	fig|6666666.88372.peg.932	peg.932	CDS	LMR001-004	172266	172012	255	Exodeoxyribonuclease VII small subunit (EC 3.1.11.6)	DNA repair, bacterial, Purine salvage cluster		PEG932	255	1100	2245	1676		1100	1962.85	833.465	1530.93	600.364	0.836753	966.235	378.916	-0.399006		L	K03602
PEG933	fig|6666666.88372.peg.933	peg.933	CDS	LMR001-004	173199	172270	930	Acetylspermidine deacetylase (EC 3.5.1.48); Deacetylases, including yeast histone deacetylase and acetoin utilization protein	Hydantoin metabolism		PEG933	927	3274	7874	5721		3274	6662.78	4012.15	4968.09	535.932	1.02533	3642.78	392.964	0.293583		BQ
PEG934	fig|6666666.88372.peg.934	peg.934	CDS	LMR001-004	174231	173263	969	Putative oxidoreductase SMc00968	Quinone oxidoreductase family		PEG934	967	858	769	2046		858	643.128	1100.29	750.083	77.568	-0.414253	978.664	101.206	0.360454		CR
PEG935	fig|6666666.88372.peg.935	peg.935	CDS	LMR001-004	174246	174647	402	FIG01076045: hypothetical protein	- none -		PEG935	402	693	854	1351		693	713.068	587.221	703.247	174.937	0.0402977	640.323	159.284	-0.239838		R	K07107
PEG936	fig|6666666.88372.peg.936	peg.936	CDS	LMR001-004	175828	174635	1194	3-ketoacyl-CoA thiolase (EC 2.3.1.16) @ Acetyl-CoA acetyltransferase (EC 2.3.1.9)	Acetyl-CoA fermentation to Butyrate, Biotin biosynthesis, Butanol Biosynthesis, Butyrate metabolism cluster, CBSS-246196.1.peg.364, Fatty acid metabolism cluster, Isoleucine degradation, Isoprenoid Biosynthesis, Polyhydroxybutyrate metabolism, Polyhydroxybutyrate metabolism, Serine-glyoxylate cycle, Serine-glyoxylate cycle		PEG936	1194	473	695	1910		473	574.383	1017.06	523.767	43.8666	0.279712	745.104	62.404	1.10403		I	K00626
PEG937	fig|6666666.88372.peg.937	peg.937	CDS	LMR001-004	177305	175812	1494	Long-chain-fatty-acid--CoA ligase (EC 6.2.1.3)	Biotin biosynthesis, Fatty acid metabolism cluster		PEG937	1494	1126	1385	3292		1126	1210.96	2064.64	1169.08	78.2516	0.103412	1595.92	106.822	0.873148		IQ
PEG938	fig|6666666.88372.peg.938	peg.938	CDS	LMR001-004	177873	177310	564	Substrate-specific component BioY of biotin ECF transporter	Biotin biosynthesis, ECF class transporters		PEG938	564	615	760	1441		615	635.018	647.578	625.097	110.833	0.0457955	631.377	111.946	0.0740529		R	K03523
PEG939	fig|6666666.88372.peg.939	peg.939	CDS	LMR001-004	178510	177905	606	Transmembrane component BioN of energizing module of biotin ECF transporter	Biotin biosynthesis, ECF class transporters		PEG939	606	220	400	867		220	345.183	320.593	282.485	46.6146	0.651263	270.19	44.5857	0.544644		P	K16783
PEG940	fig|6666666.88372.peg.940	peg.940	CDS	LMR001-004	179184	178504	681	ATPase component BioM of energizing module of biotin ECF transporter	Biotin biosynthesis, ECF class transporters		PEG940	681	821	1461	1375		821	1268.56	602.415	1044.46	153.371	0.62888	711.383	104.462	-0.445485		P	K16784
PEG941	fig|6666666.88372.peg.941	peg.941	CDS	LMR001-004	179318	180517	1200	FIG00741086: hypothetical protein	- none -		PEG941	1200	2879	2862	4329		2879	2498.86	2878.9	2688.13	224.011	-0.203493	2878.15	239.846	0.000752602		S	K09927
PEG942	fig|6666666.88372.peg.942	peg.942	CDS	LMR001-004	180607	182022	1416	TldD protein, part of TldE/TldD proteolytic complex	CBSS-316057.3.peg.563, Putative TldE-TldD proteolytic complex		PEG942	1416	11801	10338	15123		11801	8714.34	11808.1	10258.8	724.489	-0.437716	11805.7	833.733	0.000598507		R	K03568
PEG943	fig|6666666.88372.peg.943	peg.943	CDS	LMR001-004	183274	182030	1245	D-alanyl-D-alanine carboxypeptidase (EC 3.4.16.4)	CBSS-84588.1.peg.1247, Metallocarboxypeptidases (EC 3.4.17.-), Murein Hydrolases, Peptidoglycan Biosynthesis		PEG943	1245	6848	6886	8492		6848	5908.44	6301.16	6381.66	512.583	-0.214356	6578.02	528.355	-0.121515		M	K07258
PEG944	fig|6666666.88372.peg.944	peg.944	CDS	LMR001-004	183647	184693	1047	FIG00984060: hypothetical protein	- none -		PEG944	1047	2526	2555	3723		2526	2221.42	2383.97	2372.45	226.595	-0.183933	2453.73	234.358	-0.0820491		G
PEG945	fig|6666666.88372.peg.945	peg.945	CDS	LMR001-004	185393	184773	621	Pyridoxamine 5'-phosphate oxidase (EC 1.4.3.5)	Pyridoxin (Vitamin B6) Biosynthesis		PEG945	621	2777	2366	3534		2777	2064.86	2236.37	2422.29	390.062	-0.428891	2508.04	403.872	-0.313775		H	K00275
PEG946	fig|6666666.88372.peg.946	peg.946	CDS	LMR001-004	185530	185982	453	Common-antigen	- none -		PEG946	453	2152	3722	3225		2152	3254.71	2019.22	2703.75	596.854	0.596328	2086	460.486	-0.0924052
PEG947	fig|6666666.88372.peg.947	peg.947	CDS	LMR001-004	186194	187240	1047	DnaJ-class molecular chaperone CbpA	Protein chaperones		PEG947	1047	4895	3507	5672		4895	3091.72	3980.75	3994.75	381.543	-0.66372	4439.27	423.999	-0.299089		O
PEG948	fig|6666666.88372.peg.948	peg.948	CDS	LMR001-004	187443	188261	819	Enoyl-[acyl-carrier-protein] reductase [NADH] (EC 1.3.1.9)	Fatty Acid Biosynthesis FASII		PEG948	819	24705	25197	25498		24705	18653.7	20730.3	21685.5	2647.8	-0.406059	22723.8	2774.58	-0.253773		I	K00208
PEG949	fig|6666666.88372.peg.949	peg.949	CDS	LMR001-004	188409	188993	585	Phosphoglycerate mutase family (Rhiz)	Phosphoglycerate mutase protein family		PEG949	585	3283	4607	4607		3283	3925.34	3118.58	3603.15	615.923	0.258703	3199.76	546.968	-0.0732274		G	K15634
PEG950	fig|6666666.88372.peg.950	peg.950	CDS	LMR001-004	189309	189049	261	FIG00363170: hypothetical protein	- none -		PEG950	261	4711	6936	7583		4711	5947.28	5512.39	5328.53	2041.58	0.336573	5111.08	1958.27	0.22702
PEG951	fig|6666666.88372.peg.951	peg.951	CDS	LMR001-004	189599	192310	2712	diguanylate cyclase/phosphodiesterase (GGDEF & EAL domains) with PAS/PAC sensor(s)	Bacterial hemoglobins		PEG951	2712	9461	8326	13914		9461	7023.62	10817.2	8243	303.945	-0.429987	10139.8	373.886	0.193054		T
PEG952	fig|6666666.88372.peg.952	peg.952	CDS	LMR001-004	192632	192450	183	hypothetical protein	- none -		PEG952	183	296	488	481		296	409.968	179.93	352.885	192.833	0.470883	237.866	129.981	-0.71719
PEG953	fig|6666666.88372.peg.953	peg.953	CDS	LMR001-004	192624	193721	1098	Chorismate synthase (EC 4.2.3.5)	Chorismate Synthesis, Common Pathway For Synthesis of Aromatic Compounds (DAHP synthase to chorismate)		PEG953	1098	3702	6830	5863		3702	5862.71	4127.52	4780.49	435.382	0.664711	3912.9	356.366	0.15842		E	K01736
PEG954	fig|6666666.88372.peg.954	peg.954	CDS	LMR001-004	193742	194842	1101	3,4-dihydroxy-2-butanone 4-phosphate synthase (EC 4.1.99.12) / GTP cyclohydrolase II (EC 3.5.4.25)	Molybdenum cofactor biosynthesis, Riboflavin, FMN and FAD metabolism, Riboflavin, FMN and FAD metabolism, Riboflavin, FMN and FAD metabolism in plants, Riboflavin, FMN and FAD metabolism in plants, Riboflavin synthesis cluster, Riboflavin synthesis cluster, riboflavin to FAD		PEG954	1101	3633	5721	5527		3633	4903.73	3853.52	4267.26	387.58	0.4336	3742.15	339.887	0.0858974		H	K14652
PEG955	fig|6666666.88372.peg.955	peg.955	CDS	LMR001-004	195464	194934	531	Signal recognition particle GTPase	- none -		PEG955	531	5691	4594	7145		5691	3916.19	5156.53	4802.36	904.399	-0.538605	5422.53	1021.19	-0.141655		R
PEG956	fig|6666666.88372.peg.956	peg.956	CDS	LMR001-004	195836	196720	885	Cytochrome c oxidase polypeptide II (EC 1.9.3.1)	CBSS-316057.3.peg.563, Terminal cytochrome C oxidases		PEG956	885	71968	56901	89642		71968	36735.7	79671.3	54340.3	6140.15	-0.969709	75808.1	8565.89	0.147168		C	K02275
PEG957	fig|6666666.88372.peg.957	peg.957	CDS	LMR001-004	196741	198429	1689	Cytochrome c oxidase polypeptide I (EC 1.9.3.1)	Terminal cytochrome C oxidases		PEG957	1689	118480	88054	139693		118480	52476.3	127116	85526.6	5063.74	-1.17608	122846	7273.32	0.100323		C	K02274
PEG958	fig|6666666.88372.peg.958	peg.958	CDS	LMR001-004	198528	199484	957	Cytochrome c oxidase polypeptide I (EC 1.9.3.1)	Terminal cytochrome C oxidases		PEG958	957	10455	9718	13047		10455	8224.89	10151	9336.05	975.553	-0.345049	10299.1	1076.19	-0.0414922		O	K02301
PEG959	fig|6666666.88372.peg.959	peg.959	CDS	LMR001-004	199484	199624	141	hypothetical protein	- none -		PEG959	141	1874	2531	2542		1874	2201.61	1452.42	2038.3	1445.6	0.231673	1663.71	1179.93	-0.368429
PEG960	fig|6666666.88372.peg.960	peg.960	CDS	LMR001-004	199636	200241	606	Cytochrome oxidase biogenesis protein Cox11-CtaG, copper delivery to Cox1	Biogenesis of cytochrome c oxidases, CBSS-316057.3.peg.563		PEG960	606	8460	9682	12163		8460	8188.07	9445.06	8320.43	1373.01	-0.0459037	8948.92	1476.72	0.160132		O	K02258
PEG961	fig|6666666.88372.peg.961	peg.961	CDS	LMR001-004	200305	201183	879	Cytochrome c oxidase polypeptide III (EC 1.9.3.1)	CBSS-316057.3.peg.563, Terminal cytochrome C oxidases		PEG961	879	17061	19225	27781		17061	14873.3	22726.8	15967	1816.5	-0.197966	19893.8	2263.23	0.413707		C	K02276
PEG962	fig|6666666.88372.peg.962	peg.962	CDS	LMR001-004	201264	201761	498	ErfK/YbiS/YcfS/YnhG family protein	- none -		PEG962	498	466	489	1195		466	410.871	481.274	438.229	87.9977	-0.180362	473.43	95.0663	0.0478108		S
PEG963	fig|6666666.88372.peg.963	peg.963	CDS	LMR001-004	201758	202141	384	conserved hypothetical protein in cyt c oxidase gene clusters	CBSS-316057.3.peg.563		PEG963	384	1976	1624	3073		1976	1411.67	1891.52	1694.32	441.229	-0.485891	1934.25	503.71	-0.0637418		S
PEG964	fig|6666666.88372.peg.964	peg.964	CDS	LMR001-004	202134	202871	738	Cytochrome oxidase biogenesis protein Surf1, facilitates heme A insertion	Biogenesis of cytochrome c oxidases, CBSS-316057.3.peg.563		PEG964	738	1931	1636	3253		1931	1421.53	2036.39	1676.75	227.202	-0.442629	1984.18	268.859	0.0759418		S	K14998
PEG965	fig|6666666.88372.peg.965	peg.965	CDS	LMR001-004	203003	204013	1011	4-hydroxy-3-methylbut-2-enyl diphosphate reductase (EC 1.17.1.2)	Isoprenoid Biosynthesis, Nonmevalonate Branch of Isoprenoid Biosynthesis		PEG965	1011	2350	4723	3974		2350	4023.97	2585.01	3186.8	315.213	0.776184	2467.32	244.048	0.137733		IM	K03527
PEG966	fig|6666666.88372.peg.966	peg.966	CDS	LMR001-004	204083	205063	981	Homoserine kinase (EC 2.7.1.39)	CBSS-269482.1.peg.1294, Methionine Biosynthesis, Threonine and Homoserine Biosynthesis		PEG966	981	1602	2439	3123		1602	2126.68	1935.92	1864.96	190.108	0.407608	1769.58	180.385	0.272021		R	K02204
PEG967	fig|6666666.88372.peg.967	peg.967	CDS	LMR001-004	205060	205521	462	Ribonuclease HI (EC 3.1.26.4)	CBSS-228410.1.peg.134, CBSS-342610.3.peg.1536, Ribonuclease H		PEG967	462	885	1375	1631		885	1204.31	791.533	1044.71	226.129	0.444273	838.324	181.455	-0.161217		L	K03469
PEG968	fig|6666666.88372.peg.968	peg.968	CDS	LMR001-004	206076	205588	489	Peroxiredoxin	- none -		PEG968	489	7296	9519	9770		7296	8059.97	7450.04	7677.27	1569.99	0.14395	7372.31	1507.63	0.0304245		O
PEG969	fig|6666666.88372.peg.969	peg.969	CDS	LMR001-004	206979	206155	825	THIO:disulfide Interchange Protein	- none -		PEG969	825	1186	1847	2124		1186	1590.19	1149.48	1387.98	168.24	0.423379	1167.63	141.53	-0.044839		OC
PEG970	fig|6666666.88372.peg.970	peg.970	CDS	LMR001-004	207237	207004	234	hypothetical protein	- none -		PEG970	232	296	1602	848		296	1391.73	312.446	843.767	363.693	2.23418	304.123	131.088	0.078977
PEG971	fig|6666666.88372.peg.971	peg.971	CDS	LMR001-004	207268	207873	606	UPF0301 protein YqgE	Cluster containing Glutathione synthetase		PEG971	605	2038	3765	4032		2038	3287.39	2636.27	2662.22	440.036	0.690469	2336.66	386.224	0.372022		K	K07735
PEG972	fig|6666666.88372.peg.972	peg.972	CDS	LMR001-004	210812	207900	2913	Diguanylate cyclase/phosphodiesterase domain 2 (EAL)	- none -		PEG972	2913	6869	8977	11885		6869	7582.8	9226.15	7226.74	248.086	0.142277	8048.42	276.293	0.425275		T
PEG973	fig|6666666.88372.peg.973	peg.973	CDS	LMR001-004	211423	210812	612	Ribosomal-protein-S5p-alanine acetyltransferase	Ribosomal protein S5p acylation, Ribosome biogenesis bacterial		PEG973	612	1190	1701	2255		1190	1476.28	1256.8	1333.76	217.935	0.309499	1224.02	200.003	0.0772862		J	K03790
PEG974	fig|6666666.88372.peg.974	peg.974	CDS	LMR001-004	212906	211605	1302	Mitochondrial processing peptidase-like protein (EC 3.4.24.64)	- none -		PEG974	1302	17750	25995	27211		17750	19152.5	22226.7	18447.2	1416.84	0.110376	19984.3	1534.89	0.325133		R
PEG975	fig|6666666.88372.peg.975	peg.975	CDS	LMR001-004	214322	212922	1401	Threonine synthase (EC 4.2.3.1)	Threonine and Homoserine Biosynthesis		PEG975	1401	6912	15875	10134		6912	12583.1	7775.03	9750.73	695.984	0.863002	7346.67	524.388	0.168429		E	K01733
PEG976	fig|6666666.88372.peg.976	peg.976	CDS	LMR001-004	214353	214508	156	hypothetical protein	- none -		PEG976	155	67	135	137		67	99.926	42.3604	83.4572	53.8434	0.576948	54.6744	35.2738	-0.661196
PEG977	fig|6666666.88372.peg.977	peg.977	CDS	LMR001-004	214704	215204	501	FIG00984616: hypothetical protein	- none -		PEG977	501	4150	7406	6765		4150	6312.22	4842.99	5230.88	1044.09	0.605195	4496.27	897.459	0.222948
PEG978	fig|6666666.88372.peg.978	peg.978	CDS	LMR001-004	216389	215283	1107	Branched-chain amino acid ABC transporter, amino acid-binding protein (TC 3.A.1.4.1)	ABC transporter branched-chain amino acid (TC 3.A.1.4.1)		PEG978	1107	26496	28701	28093		26496	20816.4	23008.9	23650.7	2136.47	-0.347457	24747	2235.5	-0.202984		E	K01999
PEG979	fig|6666666.88372.peg.979	peg.979	CDS	LMR001-004	217293	216598	696	PHOSPHOGLYCOLATE PHOSPHATASE (EC 3.1.3.18)	- none -		PEG979	696	5851	7580	9010		5851	6442.9	6783.39	6145.4	882.96	0.139792	6315.64	907.42	0.214087		R
PEG980	fig|6666666.88372.peg.980	peg.980	CDS	LMR001-004	217618	218103	486	2Fe-2S ferredoxins, iron-sulfur binding protein	- none -		PEG980	486	451	408	950		451	352.36	362.111	401.588	82.6313	-0.355491	406.464	83.6346	-0.316108		S	K09706
PEG981	fig|6666666.88372.peg.981	peg.981	CDS	LMR001-004	218740	218057	684	Transcriptional regulator, ArsR family	CBSS-1085.1.peg.1363		PEG981	684	1063	1514	2094		1063	1311.55	1129.55	1187.85	173.662	0.301583	1096.85	160.358	0.0860562		K
PEG982	fig|6666666.88372.peg.982	peg.982	CDS	LMR001-004	218812	219141	330	(AF179595) Vco33	CBSS-1085.1.peg.1363		PEG982	329	31	41	152		31	28.9759	48.7081	29.975	9.11095	-0.0962137	39.8412	12.1098	0.653095
PEG983	fig|6666666.88372.peg.983	peg.983	CDS	LMR001-004	219138	219497	360	Antibiotic biosynthesis monooxygenase	CBSS-1085.1.peg.1363		PEG983	360	68	122	311		68	89.5936	114.426	78.8353	21.8987	0.39623	91.2516	25.3477	0.74918		R
PEG984	fig|6666666.88372.peg.984	peg.984	CDS	LMR001-004	219616	220746	1131	Modification methylase	- none -		PEG984	1131	19015	11344	24280		19015	9489.88	19607.4	14250.3	1259.98	-1.00236	19309.1	1707.26	0.0445804		L	K13581
PEG985	fig|6666666.88372.peg.985	peg.985	CDS	LMR001-004	222087	221050	1038	possible protease( EC:3.4.24.40 )	- none -		PEG985	1038	4727	2743	6367		4727	2381.38	4518.96	3556.45	342.625	-0.990501	4625.24	445.591	-0.0663111		Q
PEG986	fig|6666666.88372.peg.986	peg.986	CDS	LMR001-004	222869	222183	687	Hydrolase (EC 3.8.1.2)	- none -		PEG986	687	2233	1631	3233		2233	1414.97	2024.98	1824.27	265.541	-0.658586	2129.28	309.938	-0.141446		R	K01560
PEG987	fig|6666666.88372.peg.987	peg.987	CDS	LMR001-004	223918	222929	990	A/G-specific adenine glycosylase (EC 3.2.2.-)	CBSS-316056.14.peg.4315, DNA repair, bacterial		PEG987	990	1353	1634	2354		1353	1418.25	1333.03	1385.16	139.915	0.0689416	1342.55	135.611	-0.0204619		L	K03575
PEG988	fig|6666666.88372.peg.988	peg.988	CDS	LMR001-004	223949	224107	159	hypothetical protein	- none -		PEG988	158	31	49	253		31	34.5503	91.2471	32.7623	20.7356	0.157632	61.1106	38.6776	1.55871
PEG989	fig|6666666.88372.peg.989	peg.989	CDS	LMR001-004	224104	224607	504	FIG124007: hypothetical protein	CBSS-316056.14.peg.4315		PEG989	504	1104	2011	1806		1104	1739.03	946.905	1421.56	282.055	0.655443	1025.49	203.471	-0.221552		S
PEG990	fig|6666666.88372.peg.990	peg.990	CDS	LMR001-004	224748	225560	813	Periplasmic thiol:disulfide interchange protein DsbA	Biogenesis of c-type cytochromes, CBSS-316056.14.peg.4315, Periplasmic disulfide interchange		PEG990	813	10591	13265	13389		10591	10804.8	10417.1	10698.6	1315.95	0.0286178	10504.8	1292.11	-0.0240922		O
PEG991	fig|6666666.88372.peg.991	peg.991	CDS	LMR001-004	225687	229148	3462	Chromosome partition protein smc	DNA structural proteins, bacterial		PEG991	3462	10049	11218	15850		10049	9397.87	12398.2	9722.01	280.821	-0.0962386	11222.2	324.153	0.303483		D	K03529
PEG992	fig|6666666.88372.peg.992	peg.992	CDS	LMR001-004	229285	231981	2697	Pyruvate,phosphate dikinase (EC 2.7.9.1)	CBSS-349161.4.peg.2427, Glycolysis and Gluconeogenesis, Pyruvate metabolism I: anaplerotic reactions, PEP		PEG992	2697	10524	14251	17874		10524	11464.4	14076.9	10992	407.563	0.124073	12298.3	455.998	0.420247		G	K01006
PEG993	fig|6666666.88372.peg.993	peg.993	CDS	LMR001-004	232309	232061	249	lipoprotein, putative	- none -		PEG993	249	399	360	786		399	303.682	290.441	351.353	141.106	-0.393917	344.733	138.447	-0.458234
PEG994	fig|6666666.88372.peg.994	peg.994	CDS	LMR001-004	233104	232715	390	FIG00984092: hypothetical protein	- none -		PEG994	390	2883	4983	4655		2883	4236.31	3162.93	3560.17	912.865	0.554722	3023.48	775.252	0.133176
PEG995	fig|6666666.88372.peg.995	peg.995	CDS	LMR001-004	233458	234366	909	hypothetical protein	- none -		PEG995	909	2320	2716	3526		2320	2358.84	2230.51	2338.12	257.219	0.0255734	2273.95	250.16	-0.055128
PEG996	fig|6666666.88372.peg.996	peg.996	CDS	LMR001-004	234836	234375	462	hypothetical protein	- none -		PEG996	462	522	586	1082		522	483.905	420.043	503.151	108.907	-0.110419	471.22	101.996	-0.314607		S
PEG997	fig|6666666.88372.peg.997	peg.997	CDS	LMR001-004	235756	234836	921	Cyclase	- none -		PEG997	921	1150	1063	2214		1150	957.626	1221.52	1054.21	114.464	-0.265103	1186.16	128.791	0.086041		R
PEG998	fig|6666666.88372.peg.998	peg.998	CDS	LMR001-004	236777	236364	414	HYPOTHETICAL/UNKNOWN TRANSMEMBRANE PROTEIN	- none -		PEG998	414	1073	916	1850		1073	780.582	977.263	927.286	223.982	-0.460358	1025.63	247.736	-0.136161
PEG999	fig|6666666.88372.peg.999	peg.999	CDS	LMR001-004	237416	237559	144	HYPOTHETICAL/UNKNOWN PROTEIN	- none -		PEG999	143	18	15	85		18	11.2432	23.0769	14.616	10.221	-0.678035	20.5328	14.3586	0.359359
PEG1000	fig|6666666.88372.peg.1000	peg.1000	CDS	LMR001-004	237564	237821	258	hypothetical protein	- none -		PEG1000	255	46	55	234		46	38.8302	83.3355	42.4279	16.6384	-0.245258	64.6806	25.3649	0.856493
PEG1001	fig|6666666.88372.peg.1001	peg.1001	CDS	LMR001-004	239445	237949	1497	Sulfate adenylyltransferase subunit 1 (EC 2.7.7.4)	Cysteine Biosynthesis, Inorganic Sulfur Assimilation		PEG1001	1497	2800	7071	4676		2800	6046.34	3180.83	4422.66	295.435	1.11116	2989.9	199.726	0.1845		P	K00956
PEG1002	fig|6666666.88372.peg.1002	peg.1002	CDS	LMR001-004	240398	239445	954	Sulfate adenylyltransferase subunit 2 (EC 2.7.7.4)	Cysteine Biosynthesis, Inorganic Sulfur Assimilation		PEG1002	955	1502	3716	2999		1502	3248.09	1822.82	2375.62	248.756	1.11161	1662.98	174.134	0.278187		EH	K00957
PEG1003	fig|6666666.88372.peg.1003	peg.1003	CDS	LMR001-004	241200	240445	756	Phosphoadenylyl-sulfate reductase [thioredoxin] (EC 1.8.4.8) / Adenylyl-sulfate reductase [thioredoxin] (EC 1.8.4.10)	Cysteine Biosynthesis, Inorganic Sulfur Assimilation, Inorganic Sulfur Assimilation		PEG1003	756	2940	4623	4112		2940	3943.02	2696.39	3440.33	455.071	0.424638	2817.02	372.622	-0.123632		EH	K00390
PEG1004	fig|6666666.88372.peg.1004	peg.1004	CDS	LMR001-004	241495	241881	387	FIG00984365: hypothetical protein	- none -		PEG1004	386	222	882	620		222	740.536	236.06	481.178	124.657	1.73918	228.94	59.3108	0.0897655
PEG1005	fig|6666666.88372.peg.1005	peg.1005	CDS	LMR001-004	241881	242360	480	putative membrane protein	- none -		PEG1005	479	541	891	936		541	751.544	354.058	646.149	134.895	0.474885	447.406	93.4042	-0.610987
PEG1006	fig|6666666.88372.peg.1006	peg.1006	CDS	LMR001-004	244012	242363	1650	Choline dehydrogenase (EC 1.1.99.1)	Choline and Betaine Uptake and Betaine Biosynthesis, Choline uptake and conversion to betaine clusters		PEG1006	1650	8678	7069	9644		8678	6046.34	7332.05	7357.98	445.938	-0.519905	8000.84	484.899	-0.241751		E	K00108
PEG1007	fig|6666666.88372.peg.1007	peg.1007	CDS	LMR001-004	245620	244157	1464	Betaine aldehyde dehydrogenase (EC 1.2.1.8)	Choline and Betaine Uptake and Betaine Biosynthesis, Choline uptake and conversion to betaine clusters		PEG1007	1464	11223	8497	10465		11223	7168.7	8066.09	9194.44	628.036	-0.646314	9643.14	658.684	-0.476155		C	K00130
PEG1008	fig|6666666.88372.peg.1008	peg.1008	CDS	LMR001-004	247160	245622	1539	Choline-sulfatase (EC 3.1.6.6)	Choline and Betaine Uptake and Betaine Biosynthesis, Sulfatases and sulfatase modifying factor 1		PEG1008	1539	7125	6285	6239		7125	5421.93	4416.36	6275.23	407.747	-0.394797	5772.45	375.078	-0.690745		P	K01133
PEG1009	fig|6666666.88372.peg.1009	peg.1009	CDS	LMR001-004	247890	247279	612	HTH-type transcriptional regulator BetI	Choline and Betaine Uptake and Betaine Biosynthesis, Choline uptake and conversion to betaine clusters		PEG1009	612	3037	4172	2656		3037	3587.9	1533.6	3310.89	540.996	0.241969	2283.75	373.161	-0.984245		K	K02167
PEG1010	fig|6666666.88372.peg.1010	peg.1010	CDS	LMR001-004	248047	248586	540	FIG00985026: hypothetical protein	- none -		PEG1010	540	1600	1623	2868		1600	1407.99	1707.45	1503.77	278.477	-0.184035	1653.5	306.204	0.0941664		S
PEG1011	fig|6666666.88372.peg.1011	peg.1011	CDS	LMR001-004	248623	250545	1923	Sensory box/GGDEF family protein	- none -		PEG1011	1921	1181	1943	3101		1181	1672.47	1916.8	1426.39	74.2526	0.502798	1548.56	80.6121	0.699519		T
PEG1012	fig|6666666.88372.peg.1012	peg.1012	CDS	LMR001-004	250602	251603	1002	Quinone oxidoreductase (EC 1.6.5.5)	Quinone oxidoreductase family		PEG1012	1002	1187	1228	1974		1187	1107.77	1055.6	1146.77	114.448	-0.0981597	1120.69	111.845	-0.167753		CR
PEG1013	fig|6666666.88372.peg.1013	peg.1013	CDS	LMR001-004	252638	251895	744	FIG01075174: hypothetical protein	- none -		PEG1013	744	3261	2677	6130		3261	2325.74	4328.83	2792.06	375.276	-0.486457	3793.6	509.892	0.409826
PEG1014	fig|6666666.88372.peg.1014	peg.1014	CDS	LMR001-004	252758	253765	1008	Hypothetical protein of L-Asparaginase type 2-like superfamily	- none -		PEG1014	1008	2505	3700	4087		2505	3235.25	2673.23	2870.68	284.79	0.36843	2589.67	256.912	0.0931359		E
PEG1015	fig|6666666.88372.peg.1015	peg.1015	CDS	LMR001-004	254570	253818	753	Transcriptional repressor of the fructose operon, DeoR family	Fructose utilization		PEG1015	753	580	1161	1203		580	1060.96	486.467	820.193	108.923	0.872664	532.948	70.7766	-0.25229		KG
PEG1016	fig|6666666.88372.peg.1016	peg.1016	CDS	LMR001-004	254601	255035	435	FIG00986617: hypothetical protein	- none -		PEG1016	426	1111	2483	1508		1111	2164.07	691.181	1637.9	384.483	0.960937	901.456	211.609	-0.685674
PEG1017	fig|6666666.88372.peg.1017	peg.1017	CDS	LMR001-004	255148	255768	621	Glutathione S-transferase (EC 2.5.1.18)	Glutathione: Non-redox reactions		PEG1017	621	1740	1177	2344		1740	1074.74	1325.67	1408.27	226.775	-0.696595	1533.74	246.979	-0.39386		O	K00799
PEG1018	fig|6666666.88372.peg.1018	peg.1018	CDS	LMR001-004	256143	255778	366	hypothetical protein	- none -		PEG1018	366	541	432	1011		541	369.201	391.261	454.978	124.311	-0.550567	466.007	127.324	-0.466844		S
PEG1019	fig|6666666.88372.peg.1019	peg.1019	CDS	LMR001-004	256400	256203	198	hypothetical protein	- none -		PEG1019	197	37	50	109		37	35.2754	31.3769	36.1291	18.3396	-0.0681946	34.1798	17.3502	-0.237154
PEG1020	fig|6666666.88372.peg.1020	peg.1020	CDS	LMR001-004	256565	257500	936	Glycine cleavage system transcriptional activator	Orphan regulatory proteins		PEG1020	923	2413	1115	2917		2413	1014.4	1748.2	1714.93	185.8	-1.25167	2081.83	225.55	-0.466431		K
PEG1021	fig|6666666.88372.peg.1021	peg.1021	CDS	LMR001-004	258119	257460	660	Glutathione S-transferase (EC 2.5.1.18)	Glutathione: Non-redox reactions		PEG1021	660	9674	2652	10615		9674	2305.66	8191.53	5994.22	908.215	-2.07024	8937.15	1354.11	-0.241289		O	K00799
PEG1022	fig|6666666.88372.peg.1022	peg.1022	CDS	LMR001-004	258321	260654	2334	diguanylate cyclase/phosphodiesterase (GGDEF & EAL domains) with PAS/PAC sensor(s)	Bacterial hemoglobins		PEG1022	2334	4991	3214	6462		4991	2862.22	4590.33	3925.53	168.189	-0.801572	4789.59	205.209	-0.120109		T
PEG1023	fig|6666666.88372.peg.1023	peg.1023	CDS	LMR001-004	260922	261704	783	ErfK/YbiS/YcfS/YnhG	- none -		PEG1023	783	4206	3196	4468		4206	2848.11	3002.31	3527.69	450.535	-0.562878	3604.79	460.381	-0.486812		S
PEG1024	fig|6666666.88372.peg.1024	peg.1024	CDS	LMR001-004	262199	261723	477	Organic hydroperoxide resistance transcriptional regulator	CBSS-269482.1.peg.1294, Oxidative stress		PEG1024	477	1469	2265	2453		1469	1979.08	1396.9	1724	361.426	0.430065	1432.92	300.402	-0.0725282		K
PEG1025	fig|6666666.88372.peg.1025	peg.1025	CDS	LMR001-004	262313	262735	423	Organic hydroperoxide resistance protein	CBSS-269482.1.peg.1294, Oxidative stress		PEG1025	423	11118	11404	12048		11118	9526.19	9354.95	10321.8	2440.13	-0.222838	10236.1	2419.89	-0.249006		O
PEG1026	fig|6666666.88372.peg.1026	peg.1026	CDS	LMR001-004	263278	263066	213	Alkylphosphonate utilization operon protein PhnA	Alkylphosphonate utilization		PEG1026	213	613	871	869		613	729.887	321.402	671.119	315.079	0.253315	466.876	219.191	-0.929977		P	K06193
PEG1027	fig|6666666.88372.peg.1027	peg.1027	CDS	LMR001-004	265005	263443	1563	ATPase component BioM of energizing module of biotin ECF transporter	Biotin biosynthesis, ECF class transporters		PEG1027	1563	13553	14763	15501		13553	11803	12097.1	12677.4	811.096	-0.199345	12824.5	820.505	-0.163834		R	K06915
PEG1028	fig|6666666.88372.peg.1028	peg.1028	CDS	LMR001-004	265421	265813	393	Mlr6145 protein	- none -		PEG1028	393	4122	6027	5341		4122	5195.45	3706.54	4658.21	1185.3	0.334262	3913.76	995.867	-0.152913
PEG1029	fig|6666666.88372.peg.1029	peg.1029	CDS	LMR001-004	266783	265890	894	oxidoreductase, aldo/keto reductase family	- none -		PEG1029	892	2837	4137	5051		2837	3567.92	3464.21	3202.92	359.072	0.330251	3151.07	353.258	0.287694		R
PEG1030	fig|6666666.88372.peg.1030	peg.1030	CDS	LMR001-004	266754	266885	132	hypothetical protein	- none -		PEG1030	132	111	96	243		111	69.0764	87.198	89.9969	68.1795	-0.683223	99.0577	75.0437	-0.34712
PEG1031	fig|6666666.88372.peg.1031	peg.1031	CDS	LMR001-004	267614	266841	774	Trans-aconitate 2-methyltransferase (EC 2.1.1.144)	- none -		PEG1031	774	1386	1207	2596		1386	1096.36	1489.63	1241.56	160.408	-0.338988	1438.19	185.813	0.103242		R	K00598
PEG1032	fig|6666666.88372.peg.1032	peg.1032	CDS	LMR001-004	268289	267627	663	Putative FMN hydrolase (EC 3.1.3.-); 5-Amino-6-(5'-phosphoribitylamino)uracil phosphatase	Riboflavin, FMN and FAD metabolism, Riboflavin, FMN and FAD metabolism in plants		PEG1032	663	1557	1605	2926		1557	1391.73	1754.19	1473.85	222.3	-0.160927	1655.08	249.635	0.172997		R	K01560
PEG1033	fig|6666666.88372.peg.1033	peg.1033	CDS	LMR001-004	269026	268475	552	FIG01073884: hypothetical protein	- none -		PEG1033	552	2474	1322	2864		2474	1166.58	1701.81	1819.15	329.556	-1.08323	2086.77	378.038	-0.538445		R
PEG1034	fig|6666666.88372.peg.1034	peg.1034	CDS	LMR001-004	270165	269125	1041	Alcohol dehydrogenase (EC 1.1.1.1)	5-FCL-like protein, Butanol Biosynthesis, Glycerolipid and Glycerophospholipid Metabolism in Bacteria		PEG1034	1041	5739	1706	5977		5739	1478.98	4212.22	3610.07	346.789	-1.95674	4976.69	478.068	-0.446764		R	K00001
PEG1035	fig|6666666.88372.peg.1035	peg.1035	CDS	LMR001-004	270319	271200	882	Branched-chain amino acid aminotransferase (EC 2.6.1.42)	Alanine biosynthesis, Branched-Chain Amino Acid Biosynthesis, Isoleucine degradation, Leucine Biosynthesis, Leucine Degradation and HMG-CoA Metabolism, Pyruvate Alanine Serine Interconversions, Valine degradation		PEG1035	882	12359	4970	15438		12359	4226.77	12068	8293.12	940.264	-1.54799	12213.7	1384.78	-0.0344278		EH	K00826
PEG1036	fig|6666666.88372.peg.1036	peg.1036	CDS	LMR001-004	271289	271164	126	hypothetical protein	- none -		PEG1036	126	768	340	1027		768	282.658	397.554	525.01	416.675	-1.44085	582.458	462.268	-0.948756
PEG1037	fig|6666666.88372.peg.1037	peg.1037	CDS	LMR001-004	271994	271584	411	Lactoylglutathione lyase and related lyases	- none -		PEG1037	411	593	1038	1301		593	926.584	552.456	759.755	184.855	0.644071	572.69	139.341	-0.101992		R
PEG1038	fig|6666666.88372.peg.1038	peg.1038	CDS	LMR001-004	272241	272843	603	Manganese superoxide dismutase (EC 1.15.1.1)	Oxidative stress, Protection from Reactive Oxygen Species		PEG1038	603	53110	107519	99932		53110	61735.5	89314.8	57412	9521.05	0.217702	71201.6	11807.9	0.750502		P	K04564
PEG1039	fig|6666666.88372.peg.1039	peg.1039	CDS	LMR001-004	273662	272949	714	Transcriptional regulator, DeoR family	- none -		PEG1039	710	709	1540	1184		709	1335.99	474.613	1022.78	144.054	0.912873	592.096	83.3938	-0.580208		K
PEG1040	fig|6666666.88372.peg.1040	peg.1040	CDS	LMR001-004	273795	274433	639	cell processes; transport of small molecules; amino acids, amines, peptides	- none -		PEG1040	637	88	119	732		88	87.3114	276.249	87.6068	13.753	-0.0097304	182.075	28.5833	1.652		E
PEG1041	fig|6666666.88372.peg.1041	peg.1041	CDS	LMR001-004	274415	274537	123	hypothetical protein	- none -		PEG1041	101	3	5	54		3	4.64315	12.9922	3.82116	3.78332	0.630545	7.99566	7.91649	2.11501
PEG1042	fig|6666666.88372.peg.1042	peg.1042	CDS	LMR001-004	274667	275095	429	small molecule metabolism; energy transfer; electron transport	- none -		PEG1042	429	11855	6791	8917		11855	5840.51	6689.95	8849.1	2062.73	-1.02166	9273.82	2161.73	-0.825754		C
PEG1043	fig|6666666.88372.peg.1043	peg.1043	CDS	LMR001-004	275202	276116	915	Putative diheme cytochrome c-553	Soluble cytochromes and functionally related electron carriers		PEG1043	915	5638	4450	5475		5638	3796.22	3811.46	4716.3	515.442	-0.570206	4723.92	516.275	-0.564425		C
PEG1044	fig|6666666.88372.peg.1044	peg.1044	CDS	LMR001-004	276686	276186	501	acetyltransferase, GNAT family	- none -		PEG1044	501	645	1998	1332		645	1728.43	574.655	1187.04	236.935	1.42063	610.154	121.787	-0.168066		R
PEG1045	fig|6666666.88372.peg.1045	peg.1045	CDS	LMR001-004	277378	276965	414	Transcriptional regulator, MerR family	Cobalt-zinc-cadmium resistance		PEG1045	414	607	886	1204		607	744.859	488.11	675.798	163.236	0.295897	547.423	132.228	-0.313864		K
PEG1046	fig|6666666.88372.peg.1046	peg.1046	CDS	LMR001-004	279799	277463	2337	Glucose dehydrogenase, PQQ-dependent (EC 1.1.5.2)	D-gluconate and ketogluconates metabolism, Entner-Doudoroff Pathway, Respiratory dehydrogenases 1		PEG1046	2337	2266	3886	4986		2266	3381.24	3420.76	2822.94	120.794	0.57827	2842.7	121.639	0.595031		G	K00117
PEG1047	fig|6666666.88372.peg.1047	peg.1047	CDS	LMR001-004	281594	280089	1506	Selenoprotein O and cysteine-containing homologs	Selenoprotein O		PEG1047	1506	1959	1837	3703		1959	1583.37	2370.38	1771.11	117.604	-0.307001	2164.61	143.733	0.275115		S
PEG1048	fig|6666666.88372.peg.1048	peg.1048	CDS	LMR001-004	282695	281727	969	putative homocysteine S-methyltransferase( EC:2.1.1.10 )	- none -		PEG1048	968	436	548	1575		436	454.28	743.478	444.896	45.9603	0.0608684	589.495	60.8982	0.771578		E
PEG1049	fig|6666666.88372.peg.1049	peg.1049	CDS	LMR001-004	282912	283532	621	Transcriptional regulator, TetR family	- none -		PEG1049	618	344	472	981		344	397.72	378.329	371.035	60.038	0.207877	361.34	58.4692	0.135768		K
PEG1050	fig|6666666.88372.peg.1050	peg.1050	CDS	LMR001-004	284069	283542	528	FIG00985240: hypothetical protein	- none -		PEG1050	528	1634	1769	2414		1634	1530.06	1372.33	1581.55	299.537	-0.0939847	1502.69	284.601	-0.250939		S
PEG1051	fig|6666666.88372.peg.1051	peg.1051	CDS	LMR001-004	286189	284081	2109	Protease II (EC 3.4.21.83)	- none -		PEG1051	2109	9277	11278	15312		9277	9434.29	11949.9	9351.3	443.4	0.02561	10609.1	503.04	0.366623		E	K01354
PEG1052	fig|6666666.88372.peg.1052	peg.1052	CDS	LMR001-004	287214	286294	921	Transcriptional regulator, LysR family	CBSS-349102.4.peg.3442		PEG1052	920	392	639	1195		392	527.331	481.274	459.536	49.9496	0.428805	436.508	47.4465	0.296955		K
PEG1053	fig|6666666.88372.peg.1053	peg.1053	CDS	LMR001-004	287359	287634	276	putative; ORF located using Glimmer/Genemark	- none -		PEG1053	273	172	342	343		172	285.107	126.31	228.647	83.7534	0.727527	149.248	54.6698	-0.447006
PEG1054	fig|6666666.88372.peg.1054	peg.1054	CDS	LMR001-004	288559	287672	888	Glyoxalase family protein	- none -		PEG1054	886	910	1216	1608		910	1101.19	771.539	1005.55	113.493	0.275263	840.726	94.8901	-0.23799		R	K07104
PEG1055	fig|6666666.88372.peg.1055	peg.1055	CDS	LMR001-004	288944	289366	423	Universal stress family protein	- none -		PEG1055	422	2546	6091	3585		2546	5258.02	2272.53	3902.42	924.745	1.04582	2409.68	571.015	-0.1644		T
PEG1056	fig|6666666.88372.peg.1056	peg.1056	CDS	LMR001-004	289424	289768	345	DnaK suppressor protein	- none -		PEG1056	345	578	1458	875		578	1265.41	324.01	921.753	267.175	1.13022	451.053	130.74	-0.835269		T
PEG1057	fig|6666666.88372.peg.1057	peg.1057	CDS	LMR001-004	290118	290780	663	COG1272: Predicted membrane protein hemolysin III homolog	- none -		PEG1057	663	2024	1302	2395		2024	1153.69	1358.39	1588.36	239.571	-0.81025	1690.71	255.008	-0.57461		R	K11068
PEG1058	fig|6666666.88372.peg.1058	peg.1058	CDS	LMR001-004	291312	290815	498	FIG01076572: hypothetical protein	- none -		PEG1058	498	545	465	981		545	391.937	378.329	468.22	94.02	-0.474318	461.416	92.6538	-0.525296
PEG1059	fig|6666666.88372.peg.1059	peg.1059	CDS	LMR001-004	291783	294158	2376	Na(+) H(+) antiporter subunit A	Multi-subunit cation antiporter		PEG1059	2376	2643	6298	5495		2643	5435.34	3832.46	4038.87	169.986	1.04052	3237.43	136.256	0.536416		CP	K05565
PEG1060	fig|6666666.88372.peg.1060	peg.1060	CDS	LMR001-004	294155	294574	420	Na(+) H(+) antiporter subunit B	Multi-subunit cation antiporter		PEG1060	420	437	782	1342		437	654.102	580.88	545.309	129.835	0.583482	508.698	121.119	0.412206			K05566
PEG1061	fig|6666666.88372.peg.1061	peg.1061	CDS	LMR001-004	294574	294951	378	Na(+) H(+) antiporter subunit C	Multi-subunit cation antiporter		PEG1061	378	276	486	811		276	409.009	299.075	342.534	90.6173	0.567163	287.566	76.0758	0.115537		P	K05567
PEG1062	fig|6666666.88372.peg.1062	peg.1062	CDS	LMR001-004	294959	296518	1560	Na(+) H(+) antiporter subunit D	Multi-subunit cation antiporter		PEG1062	1555	1839	3790	3908		1839	3307.09	2534.02	2573.93	165.526	0.84525	2187.39	140.668	0.461115		CP	K05568
PEG1063	fig|6666666.88372.peg.1063	peg.1063	CDS	LMR001-004	296515	296991	477	Na(+) H(+) antiporter subunit E	Multi-subunit cation antiporter		PEG1063	475	532	1043	1273		532	932.594	534.652	732.351	154.179	0.80953	533.38	112.291	0.00688008		P	K05569
PEG1064	fig|6666666.88372.peg.1064	peg.1064	CDS	LMR001-004	296988	297377	390	Na(+) H(+) antiporter subunit F	Multi-subunit cation antiporter		PEG1064	390	289	576	627		289	475.085	239.051	382.076	97.9683	0.716777	264.059	67.7075	-0.274092		P	K05570
PEG1065	fig|6666666.88372.peg.1065	peg.1065	CDS	LMR001-004	297374	297733	360	Na(+) H(+) antiporter subunit G	Multi-subunit cation antiporter		PEG1065	359	226	435	465		226	371.218	173.567	298.581	83.1702	0.716306	199.755	55.6422	-0.380469		P	K05571
PEG1066	fig|6666666.88372.peg.1066	peg.1066	CDS	LMR001-004	298140	298571	432	transcriptional regulator	- none -		PEG1066	432	10571	21658	12723		10571	16477.9	9892.39	13523	3130.33	0.640802	10230.3	2368.12	-0.0953356		K
PEG1067	fig|6666666.88372.peg.1067	peg.1067	CDS	LMR001-004	299176	298754	423	Sulfur acceptor protein SufE for iron-sulfur cluster assembly	Iron-sulfur cluster assembly		PEG1067	423	2352	5336	3777		2352	4543.96	2425.75	3446.8	814.846	0.951516	2387.69	564.466	0.0459957		R	K02426
PEG1068	fig|6666666.88372.peg.1068	peg.1068	CDS	LMR001-004	299312	299163	150	hypothetical protein	- none -		PEG1068	144	209	562	387		209	464.783	142.789	336.856	233.928	1.15354	175.859	122.124	-0.549137
PEG1069	fig|6666666.88372.peg.1069	peg.1069	CDS	LMR001-004	299881	299444	438	FIG00985542: hypothetical protein	- none -		PEG1069	438	1421	1311	1845		1421	1160.05	973.769	1291.19	294.793	-0.294062	1198.05	273.527	-0.546604
PEG1070	fig|6666666.88372.peg.1070	peg.1070	CDS	LMR001-004	300451	302028	1578	Signal transduction histidine kinase	- none -		PEG1070	1578	8088	10770	12482		8088	9059.15	9687.98	8575.06	543.413	0.163065	8889.47	563.338	0.259885		T	K11357
PEG1071	fig|6666666.88372.peg.1071	peg.1071	CDS	LMR001-004	302000	302968	969	Peptidoglycan-binding protein	- none -		PEG1071	969	3297	4246	5289		3297	3643.08	3655.1	3469.59	358.059	0.1444	3475.6	358.679	0.149151		M
PEG1072	fig|6666666.88372.peg.1072	peg.1072	CDS	LMR001-004	303042	303401	360	FIG00791875: hypothetical protein	- none -		PEG1072	360	417	1152	887		417	1051.42	329.526	734.143	203.928	1.33467	373.198	103.666	-0.339204		S
PEG1073	fig|6666666.88372.peg.1073	peg.1073	CDS	LMR001-004	304493	303438	1056	FIG00984063: hypothetical protein	- none -		PEG1073	1056	2550	3970	3763		2550	3444.63	2418.76	2998.67	283.965	0.432325	2485.73	235.391	-0.0777541		S
PEG1074	fig|6666666.88372.peg.1074	peg.1074	CDS	LMR001-004	304996	305400	405	FIG01074459: hypothetical protein	- none -		PEG1074	405	2333	1453	2766		2333	1260.16	1620.87	1796.81	443.656	-0.888866	1977.17	488.189	-0.525697		S
PEG1075	fig|6666666.88372.peg.1075	peg.1075	CDS	LMR001-004	305615	305397	219	hypothetical protein	- none -		PEG1075	219	514	383	752		514	328.822	280.948	421.433	192.435	-0.644585	397.496	181.505	-0.871589
PEG1076	fig|6666666.88372.peg.1076	peg.1076	CDS	LMR001-004	305614	305898	285	FIG01075975: hypothetical protein	- none -		PEG1076	284	720	1991	1376		720	1718.63	604.61	1219.04	429.239	1.25629	662.029	233.109	-0.250888
PEG1077	fig|6666666.88372.peg.1077	peg.1077	CDS	LMR001-004	306244	306396	153	FIG00984711: hypothetical protein	- none -		PEG1077	153	406	543	650		406	450.679	248.723	428.561	280.105	0.149047	327.583	214.107	-0.708514
PEG1078	fig|6666666.88372.peg.1078	peg.1078	CDS	LMR001-004	307043	306498	546	FIG00450489: hypothetical protein	- none -		PEG1078	546	1113	1037	1815		1113	926.584	953.112	1019.16	186.659	-0.262815	1032.42	189.088	-0.222092		S
PEG1079	fig|6666666.88372.peg.1079	peg.1079	CDS	LMR001-004	307623	307036	588	FIG00450701: hypothetical protein	- none -		PEG1079	588	473	504	1011		473	422.681	391.261	447.916	76.1762	-0.162733	432.206	73.5044	-0.274172		S
PEG1080	fig|6666666.88372.peg.1080	peg.1080	CDS	LMR001-004	309960	307720	2241	Multimodular transpeptidase-transglycosylase (EC 2.4.1.129) (EC 3.4.-.-)	Peptidoglycan Biosynthesis		PEG1080	2241	9357	8723	12691		9357	7373.37	9846.43	8363.71	373.213	-0.343268	9600.24	428.391	0.0740083		M	K05366
PEG1081	fig|6666666.88372.peg.1081	peg.1081	CDS	LMR001-004	310078	310545	468	conserved protein of unknown function; putative YcgN protein	- none -		PEG1081	468	1076	1731	1695		1076	1497.95	851.145	1287.21	275.045	0.476691	963.805	205.941	-0.338825		S	K09160
PEG1082	fig|6666666.88372.peg.1082	peg.1082	CDS	LMR001-004	310903	310568	336	FIG01074834: hypothetical protein	- none -		PEG1082	336	1235	2615	1956		1235	2270.82	1044.43	1753.38	521.841	0.877597	1140.19	339.342	-0.242904		S
PEG1083	fig|6666666.88372.peg.1083	peg.1083	CDS	LMR001-004	311263	311123	141	hypothetical protein	- none -		PEG1083	141	3409	295	7002		3409	236.728	5037.84	1824.33	1293.85	-3.84929	4224.88	2996.37	0.562217
PEG1084	fig|6666666.88372.peg.1084	peg.1084	CDS	LMR001-004	311845	312096	252	CONSERVED HYPOTHETICAL SIGNAL PEPTIDE PROTEIN	- none -		PEG1084	252	3054	2080	3534		3054	1810.56	2236.37	2432.74	965.374	-0.754695	2645.65	1049.86	-0.449974
PEG1085	fig|6666666.88372.peg.1085	peg.1085	CDS	LMR001-004	312139	312810	672	Two-component system response regulator QseB	Orphan regulatory proteins		PEG1085	672	7746	5840	8819		7746	5017.19	6596.37	6380.9	949.539	-0.626315	7170.49	1067.04	-0.231521		TK	K02483
PEG1086	fig|6666666.88372.peg.1086	peg.1086	CDS	LMR001-004	312878	314185	1308	Sensor histidine kinase	- none -		PEG1086	1308	3235	2574	4110		3235	2241.8	2696.39	2738.87	209.394	-0.529524	2966.16	226.771	-0.263153		T
PEG1087	fig|6666666.88372.peg.1087	peg.1087	CDS	LMR001-004	314386	314853	468	Outer membrane lipoprotein-related protein	- none -		PEG1087	468	1889	2581	3239		1889	2246.77	2024.98	2067.38	441.748	0.250998	1956.49	418.052	0.101055		M
PEG1088	fig|6666666.88372.peg.1088	peg.1088	CDS	LMR001-004	315175	316272	1098	Cytochrome c heme lyase subunit CcmH	Biogenesis of c-type cytochromes, Copper homeostasis		PEG1088	1098	3051	3402	5547		3051	3013.32	3874.65	3030.61	276.012	-0.0164571	3461.27	315.234	0.346251		O	K02200
PEG1089	fig|6666666.88372.peg.1089	peg.1089	CDS	LMR001-004	316269	316721	453	Cytochrome c-type biogenesis protein CcmE, heme chaperone	Biogenesis of c-type cytochromes		PEG1089	453	1926	1929	3107		1926	1661.24	1916.8	1794.38	396.111	-0.214486	1922.16	424.318	-0.00805204		O	K02197
PEG1090	fig|6666666.88372.peg.1090	peg.1090	CDS	LMR001-004	316718	318706	1989	Cytochrome c heme lyase subunit CcmF	Biogenesis of c-type cytochromes, Copper homeostasis		PEG1090	1989	5795	6085	11580		5795	5245.33	8990.58	5519.81	277.517	-0.143597	7392.43	371.666	0.633783		O	K02198
PEG1091	fig|6666666.88372.peg.1091	peg.1091	CDS	LMR001-004	318703	319158	456	Cytochrome c heme lyase subunit CcmL	Biogenesis of c-type cytochromes		PEG1091	456	1217	1072	2273		1217	966.453	1274.17	1091.32	239.324	-0.331592	1245.18	273.066	0.0671979		O	K02200
PEG1092	fig|6666666.88372.peg.1092	peg.1092	CDS	LMR001-004	319353	319544	192	hypothetical protein	- none -		PEG1092	192	1611	3215	1928		1611	2862.22	1028.13	2236.43	1164.81	0.829495	1319.39	687.18	-0.647623
PEG1093	fig|6666666.88372.peg.1093	peg.1093	CDS	LMR001-004	319531	321090	1560	macromolecule metabolism; macromolecule degradation; degradation of proteins, peptides, glycopeptides	CBSS-316057.3.peg.1308		PEG1093	1560	18746	30078	20101		18746	21641.5	15942.2	20195.7	1294.6	0.206914	17346.1	1111.93	-0.234032		O	K01362
PEG1094	fig|6666666.88372.peg.1094	peg.1094	CDS	LMR001-004	321389	322090	702	response regulator in two-component regulatory system with PhoQ	Phosphate metabolism		PEG1094	701	2426	3236	3167		2426	2882.51	1972.9	2654.56	378.682	0.248381	2199.76	313.803	-0.298623		TK	K02483
PEG1095	fig|6666666.88372.peg.1095	peg.1095	CDS	LMR001-004	322087	323484	1398	Sensor protein basS/pmrB (EC 2.7.3.-)	Orphan regulatory proteins		PEG1095	1398	2288	3035	4045		2288	2684.57	2643.43	2485.08	177.76	0.232117	2464.51	176.288	0.209836		T
PEG1096	fig|6666666.88372.peg.1096	peg.1096	CDS	LMR001-004	323517	326474	2958	macromolecule metabolism; macromolecule synthesis, modification; proteins and peptides - translation and modification	CBSS-316057.3.peg.1308, CBSS-316057.3.peg.1308		PEG1096	2958	5396	8545	10328		5396	7218.39	7940.51	6306.75	213.21	0.420025	6667.81	225.416	0.557581		OT	K00982
PEG1097	fig|6666666.88372.peg.1097	peg.1097	CDS	LMR001-004	329065	326705	2361	Two-component sensor histidine kinase PleC	Orphan regulatory proteins		PEG1097	2361	13172	6733	13536		13172	5791.79	10516	9487.18	401.829	-1.18655	11849.3	501.875	-0.326048		T	K07716
PEG1098	fig|6666666.88372.peg.1098	peg.1098	CDS	LMR001-004	332091	329437	2655	Membrane alanine aminopeptidase N (EC 3.4.11.2)	Aminopeptidases (EC 3.4.11.-)		PEG1098	2655	21086	25310	26941		21086	18724.2	21953.3	19905.2	749.726	-0.171402	21519.8	810.538	0.0581327		E	K01256
PEG1099	fig|6666666.88372.peg.1099	peg.1099	CDS	LMR001-004	332491	333429	939	membrane protein, putative	- none -		PEG1099	939	3529	2160	4953		3529	1887.29	3395.31	2709.56	288.558	-0.904098	3463.57	368.857	-0.0568727		GER	K15270
PEG1100	fig|6666666.88372.peg.1100	peg.1100	CDS	LMR001-004	333682	333527	156	HYPOTHETICAL UNKNOWN PROTEIN	- none -		PEG1100	156	664	714	1593		664	592.724	758.783	628.234	402.714	-0.163263	711.263	455.938	0.193062
PEG1101	fig|6666666.88372.peg.1101	peg.1101	CDS	LMR001-004	333917	333741	177	HYPOTHETICAL UNKNOWN PROTEIN	- none -		PEG1101	177	3185	2815	7178		3185	2446.37	5182.53	2815.28	1590.55	-0.38029	4183.36	2363.48	0.702726
PEG1102	fig|6666666.88372.peg.1102	peg.1102	CDS	LMR001-004	334944	334057	888	Uracil-DNA glycosylase, family 4	Uracil-DNA glycosylase		PEG1102	886	1650	2278	3019		1650	1992.72	1841.27	1820.44	205.468	0.273883	1744.71	196.92	0.159839		L	K02334
PEG1103	fig|6666666.88372.peg.1103	peg.1103	CDS	LMR001-004	336350	335061	1290	Putative heat shock protein YegD	- none -		PEG1103	1290	759	2023	2195		759	1751.62	1204.15	1255.1	97.2944	1.20732	981.363	76.0747	0.666645		O	K04046
PEG1104	fig|6666666.88372.peg.1104	peg.1104	CDS	LMR001-004	336723	338387	1665	Electron transfer flavoprotein-ubiquinone oxidoreductase (EC 1.5.5.1)	Acetyl-CoA fermentation to Butyrate, Anaerobic respiratory reductases		PEG1104	1665	18107	13153	18077		18107	10719.6	14249.1	14416.5	865.855	-0.756812	16181.2	971.846	-0.34619		C	K00311
PEG1105	fig|6666666.88372.peg.1105	peg.1105	CDS	LMR001-004	338773	338588	186	hypothetical protein	- none -		PEG1105	186	5900	5278	5566		5900	4489.3	3895.82	5195.66	2793.36	-0.394716	4898.92	2633.83	-0.599278
PEG1106	fig|6666666.88372.peg.1106	peg.1106	CDS	LMR001-004	338795	339793	999	L-proline glycine betaine binding ABC transporter protein ProX (TC 3.A.1.12.1)	Choline and Betaine Uptake and Betaine Biosynthesis		PEG1106	999	97011	63711	79913		97011	40257.6	70544.8	68654.3	6872.3	-1.26948	83797.9	8388.18	-0.460203		E	K02002
PEG1107	fig|6666666.88372.peg.1107	peg.1107	CDS	LMR001-004	339992	340879	888	L-proline glycine betaine ABC transport system permease protein ProW (TC 3.A.1.12.1)	Choline and Betaine Uptake and Betaine Biosynthesis		PEG1107	888	32159	22612	26701		32159	17066.5	21790.5	24601.5	2770.44	-0.913053	26963.5	3036.43	-0.56052		E	K02001
PEG1108	fig|6666666.88372.peg.1108	peg.1108	CDS	LMR001-004	341992	340979	1014	Bifunctional protein: zinc-containing alcohol dehydrogenase; quinone oxidoreductase ( NADPH:quinone reductase) (EC 1.1.1.-); Similar to arginate lyase	- none -		PEG1108	1013	2649	2584	3125		2649	2246.77	1935.92	2447.63	241.622	-0.237325	2292.21	226.279	-0.452159		CR
PEG1109	fig|6666666.88372.peg.1109	peg.1109	CDS	LMR001-004	342095	342496	402	Transcriptional regulator, MarR family; Cinnamoyl ester hydrolase	- none -		PEG1109	402	883	1526	1389		883	1323.57	613.361	1103.33	274.459	0.583821	748.22	186.124	-0.525808		K
PEG1110	fig|6666666.88372.peg.1110	peg.1110	CDS	LMR001-004	342782	343630	849	Transcription regulator [contains diacylglycerol kinase catalytic domain]	- none -		PEG1110	849	637	744	1434		637	621.023	643.36	628.909	74.0765	-0.0361844	640.078	75.392	0.0147966		IR	K07029
PEG1111	fig|6666666.88372.peg.1111	peg.1111	CDS	LMR001-004	345127	343643	1485	FIG00983729: hypothetical protein	- none -		PEG1111	1484	2008	2416	4161		2008	2107.73	2736.04	2058.41	138.707	0.0691486	2372.56	159.876	0.445543		M
PEG1112	fig|6666666.88372.peg.1112	peg.1112	CDS	LMR001-004	346118	345120	999	PUTATIVE GLYCOSYLTRANSFERASE TRANSMEMBRANE PROTEIN	- none -		PEG1112	999	2180	2331	3482		2180	2037	2201.79	2107.35	210.946	-0.0963691	2189.75	219.194	0.0158674		M
PEG1113	fig|6666666.88372.peg.1113	peg.1113	CDS	LMR001-004	346143	347192	1050	FIG01075715: hypothetical protein	- none -		PEG1113	1049	870	1882	2143		870	1622.39	1163.65	1246.68	118.844	0.897439	1017.31	96.9786	0.417971
PEG1114	fig|6666666.88372.peg.1114	peg.1114	CDS	LMR001-004	348701	347199	1503	AMP nucleosidase (EC 3.2.2.4)	Purine conversions		PEG1114	1503	7733	9557	9533		7733	8079.3	7234.72	7903.05	525.818	0.0643573	7480.76	497.722	-0.0949352		F	K01241
PEG1115	fig|6666666.88372.peg.1115	peg.1115	CDS	LMR001-004	349095	348775	321	Protein of unknown function UPF0060	- none -		PEG1115	321	209	228	391		209	182.642	144.185	195.786	60.9924	-0.194001	176.557	55.0023	-0.535095		S	K09771
PEG1116	fig|6666666.88372.peg.1116	peg.1116	CDS	LMR001-004	349356	349183	174	HYPOTHETICAL UNKNOWN TRANSMEMBRANE PROTEIN	- none -		PEG1116	174	637	334	973		637	276.93	373.976	456.863	262.565	-1.20131	505.386	290.452	-0.767883
PEG1117	fig|6666666.88372.peg.1117	peg.1117	CDS	LMR001-004	349607	349434	174	HYPOTHETICAL UNKNOWN TRANSMEMBRANE PROTEIN	- none -		PEG1117	174	667	362	1238		667	306.328	510.601	486.567	279.636	-1.12219	588.704	338.336	-0.385072
PEG1118	fig|6666666.88372.peg.1118	peg.1118	CDS	LMR001-004	349789	350490	702	Glutathione S-transferase (EC 2.5.1.18)	Glutathione: Non-redox reactions		PEG1118	702	14911	5796	18459		14911	4979.73	14564.2	9953.84	1417.93	-1.58388	14746.1	2100.58	-0.0355918		O	K00799
PEG1119	fig|6666666.88372.peg.1119	peg.1119	CDS	LMR001-004	350710	350853	144	hypothetical protein	- none -		PEG1119	144	437	377	520		437	322.058	195.66	379.287	263.394	-0.438713	316.088	219.505	-1.15769
PEG1120	fig|6666666.88372.peg.1120	peg.1120	CDS	LMR001-004	350853	351533	681	Hypothetical protein, AT1G64980 homolog	- none -		PEG1120	681	5207	3295	5429		5207	2930.35	3779.87	4071.15	597.819	-0.830748	4495.91	660.192	-0.463486
PEG1121	fig|6666666.88372.peg.1121	peg.1121	CDS	LMR001-004	352351	351560	792	STRUCTURAL ELEMENTS; Cell Exterior; surface polysaccharides/antigens	- none -		PEG1121	792	2076	1672	2638		2076	1450.47	1519.9	1762.69	222.562	-0.516531	1797.4	226.945	-0.449079
PEG1122	fig|6666666.88372.peg.1122	peg.1122	CDS	LMR001-004	352867	352526	342	FIG00027233: possible membrane protein	- none -		PEG1122	342	669	421	765		669	361.836	284.555	515.09	150.611	-0.885257	476.449	139.313	-1.23188		S
PEG1123	fig|6666666.88372.peg.1123	peg.1123	CDS	LMR001-004	353542	353808	267	FOG: TPR repeat, SEL1 subfamily	- none -		PEG1123	267	1502	1349	1803		1502	1186.55	943.776	1344.84	503.687	-0.341212	1223.46	458.224	-0.671465			K07126
PEG1124	fig|6666666.88372.peg.1124	peg.1124	CDS	LMR001-004	354952	353831	1122	Biosynthetic Aromatic amino acid aminotransferase beta (EC 2.6.1.57)	Phenylalanine and Tyrosine Branches from Chorismate		PEG1124	1120	3146	4212	5134		3146	3615.13	3527.45	3381.44	301.914	0.199726	3337.6	298	0.164306		E	K00817
PEG1125	fig|6666666.88372.peg.1125	peg.1125	CDS	LMR001-004	355424	355077	348	hypothetical protein	- none -		PEG1125	347	159	83	213		159	60.044	74.6182	109.449	31.5416	-1.40362	116.736	33.6416	-1.09011
PEG1126	fig|6666666.88372.peg.1126	peg.1126	CDS	LMR001-004	355650	355378	273	hypothetical protein	- none -		PEG1126	268	85	47	123		85	33.1466	36.6886	59.0323	22.027	-1.35721	60.8033	22.6878	-1.21074
PEG1127	fig|6666666.88372.peg.1127	peg.1127	CDS	LMR001-004	356175	356390	216	hypothetical protein	- none -		PEG1127	216	396	389	660		396	335.052	252.828	365.665	169.289	-0.242129	324.553	150.256	-0.648358
PEG1128	fig|6666666.88372.peg.1128	peg.1128	CDS	LMR001-004	357197	358267	1071	ATP/GTP-binding site motif A (P-loop) :Porin, alpha proteobacteria type	- none -		PEG1128	1071	2023645	2046660	1981139		2023645	878265	2.00339e+06	1.45064e+06	135447	-1.20378	2.01321e+06	187974	-0.0140641
PEG1129	fig|6666666.88372.peg.1129	peg.1129	CDS	LMR001-004	358674	359198	525	(U62541) immunoreactive 14 kDa protein BA14k	- none -		PEG1129	525	5053	5682	6598		5053	4878.68	4702	4968.46	946.374	-0.0521476	4880.12	929.547	-0.105362
PEG1130	fig|6666666.88372.peg.1130	peg.1130	CDS	LMR001-004	360169	359303	867	probable hydrolase	- none -		PEG1130	867	746	922	1616		746	788.447	778.219	767.448	88.5176	0.07897	762.334	87.9278	0.0601322		R
PEG1131	fig|6666666.88372.peg.1131	peg.1131	CDS	LMR001-004	362418	360352	2067	Soluble lytic murein transglycosylase precursor (EC 3.2.1.-)	Murein Hydrolases		PEG1131	2067	4179	4997	6727		4179	4255.47	4817.16	4216.89	204.01	0.0264017	4497.73	217.597	0.205265		M	K08309
PEG1132	fig|6666666.88372.peg.1132	peg.1132	CDS	LMR001-004	362726	363610	885	4-hydroxy-tetrahydrodipicolinate synthase (EC 4.3.3.7)	Lysine Biosynthesis DAP Pathway, Lysine Biosynthesis DAP Pathway, GJO scratch		PEG1132	885	7545	11000	10352		7545	9226.38	7960.67	8388.65	947.87	0.289111	7755.8	876.361	0.0762376		EM	K01714
PEG1133	fig|6666666.88372.peg.1133	peg.1133	CDS	LMR001-004	363610	364089	480	tmRNA-binding protein SmpB	Heat shock dnaK gene cluster extended, Translation termination factors bacterial		PEG1133	480	2600	4583	3257		2600	3907.42	2042.04	3253.79	677.873	0.587617	2321.1	483.563	-0.348586		O	K03664
PEG1134	fig|6666666.88372.peg.1134	peg.1134	CDS	LMR001-004	364775	364197	579	Mll7752 protein	CBSS-176299.4.peg.1292		PEG1134	579	6502	8649	9202		6502	7303.29	6951.17	6902.29	1192.11	0.167819	6726.23	1161.7	0.0965287		S
PEG1135	fig|6666666.88372.peg.1135	peg.1135	CDS	LMR001-004	365247	365651	405	DNA-directed RNA polymerase omega subunit (EC 2.7.7.6)	CBSS-176299.4.peg.1292, RNA polymerase bacterial		PEG1135	405	9679	24050	13832		9679	17969.6	10766.3	13826.2	3413.88	0.892068	10224.5	2524.58	0.153031		K	K03060
PEG1136	fig|6666666.88372.peg.1136	peg.1136	CDS	LMR001-004	365755	367980	2226	GTP pyrophosphokinase (EC 2.7.6.5), (p)ppGpp synthetase II / Guanosine-3',5'-bis(diphosphate) 3'-pyrophosphohydrolase (EC 3.1.7.2)	CBSS-176299.4.peg.1292, CBSS-176299.4.peg.1292, Stringent Response, (p)ppGpp metabolism, Stringent Response, (p)ppGpp metabolism		PEG1136	2226	4236	10404	7864		4236	8771.42	5751.62	6503.92	292.18	1.04996	4994.02	224.35	0.441119		TK	K01139
PEG1137	fig|6666666.88372.peg.1137	peg.1137	CDS	LMR001-004	368170	368030	141	hypothetical protein	- none -		PEG1137	117	20	44	57		20	31.0134	13.9048	25.506	21.8	0.63299	16.9517	14.4887	-0.524314
PEG1138	fig|6666666.88372.peg.1138	peg.1138	CDS	LMR001-004	368197	368349	153	HYPOTHETICAL UNKNOWN PROTEIN	- none -		PEG1138	153	2906	5528	6096		2906	4727.2	4307.46	3815.61	2493.86	0.702933	3605.74	2356.69	0.568784
PEG1139	fig|6666666.88372.peg.1139	peg.1139	CDS	LMR001-004	368821	369378	558	hypothetical protein NAS141_09886	CBSS-176299.4.peg.1292		PEG1139	558	1344	2185	2350		1344	1909.69	1329.37	1626.23	291.439	0.508133	1336.07	239.439	-0.0144649		S	K09928
PEG1140	fig|6666666.88372.peg.1140	peg.1140	CDS	LMR001-004	369375	369794	420	Holo-[acyl-carrier protein] synthase (EC 2.7.8.7)	CBSS-176299.4.peg.1292, Fatty Acid Biosynthesis FASII		PEG1140	420	1368	1650	1795		1368	1431.29	937.456	1399.51	333.216	0.0655314	1152.59	274.427	-0.544959		I	K00997
PEG1141	fig|6666666.88372.peg.1141	peg.1141	CDS	LMR001-004	369951	370694	744	Signal peptidase I (EC 3.4.21.89)	CBSS-176299.4.peg.1292, Signal peptidase		PEG1141	744	4005	11382	6720		4005	9509.15	4804.25	6758.91	908.456	1.24619	4406.46	592.266	0.261189		U	K03100
PEG1142	fig|6666666.88372.peg.1142	peg.1142	CDS	LMR001-004	370709	371410	702	Ribonuclease III (EC 3.1.26.3)	CBSS-176299.4.peg.1292, RNA processing and degradation, bacterial		PEG1142	702	1995	5376	3629		1995	4577.89	2310.47	3286.57	468.173	1.1981	2152.86	306.676	0.211605		K	K03685
PEG1143	fig|6666666.88372.peg.1143	peg.1143	CDS	LMR001-004	371383	372348	966	GTP-binding protein Era	Bacterial Cell Division, CBSS-176299.4.peg.1292, Glycyl-tRNA synthetase containing cluster, Universal GTPases		PEG1143	966	4062	9243	5674		4062	7818.25	3980.75	5941.34	615.046	0.943791	4022.59	416.417	-0.0300133		R	K03595
PEG1144	fig|6666666.88372.peg.1144	peg.1144	CDS	LMR001-004	373186	372470	717	Arsenic resistance protein ArsH	- none -		PEG1144	717	999	1047	1365		999	937.989	595.854	968.994	135.146	-0.0923578	797.927	111.287	-0.74697		R	K11811
PEG1145	fig|6666666.88372.peg.1145	peg.1145	CDS	LMR001-004	373601	373179	423	Arsenate reductase (EC 1.20.4.1)	Anaerobic respiratory reductases, Transcription repair cluster		PEG1145	423	836	617	948		836	509.099	360.956	672.351	158.948	-0.714871	598.28	141.437	-1.21099		P	K00537
PEG1146	fig|6666666.88372.peg.1146	peg.1146	CDS	LMR001-004	374299	373598	702	Aquaporin Z	Osmoregulation		PEG1146	705	1194	1000	1800		1194	880.955	940.627	1037.47	147.159	-0.438648	1067.31	151.391	-0.344094		G
PEG1147	fig|6666666.88372.peg.1147	peg.1147	CDS	LMR001-004	374820	374299	522	Arsenate reductase (EC 1.20.4.1)	Anaerobic respiratory reductases, Transcription repair cluster		PEG1147	522	924	1086	1272		924	983.447	532.773	954.072	182.772	0.0888644	728.736	139.605	-0.795461		T	K03741
PEG1148	fig|6666666.88372.peg.1148	peg.1148	CDS	LMR001-004	375169	374813	357	Arsenate reductase (EC 1.20.4.1)	Anaerobic respiratory reductases, Transcription repair cluster		PEG1148	356	377	428	792		377	366.577	292.904	371.64	104.393	-0.0393149	334.804	94.046	-0.363004		K
PEG1149	fig|6666666.88372.peg.1149	peg.1149	CDS	LMR001-004	376266	375283	984	Glycerophosphoryl diester phosphodiesterase (EC 3.1.4.46)	CBSS-176299.4.peg.1996A, Glycerol and Glycerol-3-phosphate Uptake and Utilization		PEG1149	984	1805	1456	2992		1805	1262.77	1816.52	1532.89	155.782	-0.513824	1809.77	183.92	0.0107674		C	K01126
PEG1150	fig|6666666.88372.peg.1150	peg.1150	CDS	LMR001-004	376862	378151	1290	Cyclopropane-fatty-acyl-phospholipid synthase (EC 2.1.1.79)	- none -		PEG1150	1290	9513	6471	8572		9513	5582.29	6373.75	7544.17	584.819	-0.767989	7939.9	615.496	-0.576703		M	K00574
PEG1151	fig|6666666.88372.peg.1151	peg.1151	CDS	LMR001-004	378409	380709	2301	Transcription accessory protein (S1 RNA-binding domain)	CBSS-243265.1.peg.198, Cell division-ribosomal stress proteins cluster, Transcription factors bacterial		PEG1151	2301	6918	12656	10190		6918	10373.5	7815.81	8645.89	375.745	0.584406	7367.06	320.168	0.175975		K	K06959
PEG1152	fig|6666666.88372.peg.1152	peg.1152	CDS	LMR001-004	380954	381262	309	conserved hypothetical signal peptide protein	- none -		PEG1152	309	1742	5009	2447		1742	4264.98	1393.36	3003.39	971.972	1.29195	1567.58	507.309	-0.322017
PEG1153	fig|6666666.88372.peg.1153	peg.1153	CDS	LMR001-004	382674	381361	1314	UDP-glucose dehydrogenase (EC 1.1.1.22)	- none -		PEG1153	1314	29653	53955	46386		29653	35191.7	39409	32420	2467.28	0.247286	34528.7	2627.75	0.410576		M	K00012
PEG1154	fig|6666666.88372.peg.1154	peg.1154	CDS	LMR001-004	383841	382816	1026	UDP-glucuronate 5'-epimerase (EC 5.1.3.12)	CBSS-296591.1.peg.2330		PEG1154	1026	5478	5247	7817		5478	4467.46	5705.56	4975.11	484.904	-0.295451	5594.16	545.24	0.0574628		MG	K08679
PEG1155	fig|6666666.88372.peg.1155	peg.1155	CDS	LMR001-004	384243	383911	333	transcriptional regulator (ArsR family)	- none -		PEG1155	332	126	210	254		126	166.103	91.7286	145.998	43.9752	0.399882	108.811	32.7743	-0.456749		K
PEG1156	fig|6666666.88372.peg.1156	peg.1156	CDS	LMR001-004	384295	384777	483	FIG01075546: hypothetical protein	- none -		PEG1156	483	778	1406	1641		778	1226.85	801.991	1002.45	207.546	0.657054	790.014	163.564	0.0437486		S
PEG1157	fig|6666666.88372.peg.1157	peg.1157	CDS	LMR001-004	384790	385152	363	FIG01075665: hypothetical protein	- none -		PEG1157	362	462	880	930		462	738.416	350.711	600.399	165.856	0.675352	406.546	112.305	-0.398801
PEG1158	fig|6666666.88372.peg.1158	peg.1158	CDS	LMR001-004	385776	385159	618	hypothetical protein	- none -		PEG1158	617	464	669	1236		464	550.43	508.653	507.472	82.2484	0.244832	486.584	78.8629	0.130956		S
PEG1159	fig|6666666.88372.peg.1159	peg.1159	CDS	LMR001-004	386069	386830	762	DNA recombination and repair protein RecO	CBSS-176299.4.peg.1292, DNA repair, bacterial RecFOR pathway, Glycyl-tRNA synthetase containing cluster		PEG1159	754	1555	2574	2646		1555	2241.8	1528.99	1898.88	251.841	0.526849	1542.48	204.573	-0.0252278		L	K03584
PEG1160	fig|6666666.88372.peg.1160	peg.1160	CDS	LMR001-004	388894	386891	2004	Putative phosphatase	- none -		PEG1160	2004	1618	2127	3626		1618	1859.8	2304.02	1738.94	86.7734	0.200862	1961.05	97.8568	0.509872		R	K07093
PEG1161	fig|6666666.88372.peg.1161	peg.1161	CDS	LMR001-004	389288	388992	297	hypothetical protein	- none -		PEG1161	289	475	232	723		475	185.995	273.595	330.665	114.417	-1.35368	374.465	129.573	-0.796904
PEG1162	fig|6666666.88372.peg.1162	peg.1162	CDS	LMR001-004	389292	391973	2682	FIG01074088: hypothetical protein	- none -		PEG1162	2682	5713	2334	9248		5713	2037	6989.11	3875.89	144.515	-1.48826	6351.95	236.836	0.290409		S
PEG1163	fig|6666666.88372.peg.1163	peg.1163	CDS	LMR001-004	391970	392626	657	metal-dependent phosphohydrolase	- none -		PEG1163	657	1449	540	2033		1449	448.092	1092.19	948.432	144.358	-1.69296	1270.48	193.376	-0.407606		R	K06950
PEG1164	fig|6666666.88372.peg.1164	peg.1164	CDS	LMR001-004	392706	393557	852	Flavodoxin reductases (ferredoxin-NADPH reductases) family 1	Anaerobic respiratory reductases		PEG1164	852	4028	3327	5151		4028	2954.51	3546.05	3490.84	409.723	-0.446847	3786.61	444.438	-0.183552		R	K07140
PEG1165	fig|6666666.88372.peg.1165	peg.1165	CDS	LMR001-004	393689	394927	1239	MFS permease	- none -		PEG1165	1239	13881	4127	16693		13881	3561.21	13115.8	8714.39	703.34	-1.96127	13491.7	1088.92	-0.0804034		P
PEG1166	fig|6666666.88372.peg.1166	peg.1166	CDS	LMR001-004	395092	396171	1080	Quinolinate synthetase (EC 2.5.1.72)	Mycobacterium virulence operon possibly involved in quinolinate biosynthesis, NAD and NADP cofactor biosynthesis global		PEG1166	1080	3591	7383	4823		3591	6286.34	3293.78	4937.78	457.202	0.808551	3441.5	318.657	-0.123925		H	K03517
PEG1167	fig|6666666.88372.peg.1167	peg.1167	CDS	LMR001-004	396304	396161	144	hypothetical protein	- none -		PEG1167	144	194	413	336		194	356.099	123.714	275.094	191.037	0.875563	158.901	110.348	-0.649706
PEG1168	fig|6666666.88372.peg.1168	peg.1168	CDS	LMR001-004	396290	397888	1599	L-aspartate oxidase (EC 1.4.3.16)	Mycobacterium virulence operon possibly involved in quinolinate biosynthesis, NAD and NADP cofactor biosynthesis global		PEG1168	1599	2568	4159	4530		2568	3581.21	3055.33	3075.8	192.358	0.478455	2812.86	175.914	0.249338		H	K00278
PEG1169	fig|6666666.88372.peg.1169	peg.1169	CDS	LMR001-004	397932	398834	903	Quinolinate phosphoribosyltransferase [decarboxylating] (EC 2.4.2.19)	Mycobacterium virulence operon possibly involved in quinolinate biosynthesis, NAD and NADP cofactor biosynthesis global		PEG1169	903	1027	1632	2153		1027	1418.25	1171.5	1223.13	135.452	0.464251	1099.76	121.789	0.188493		H	K00767
PEG1170	fig|6666666.88372.peg.1170	peg.1170	CDS	LMR001-004	398944	399462	519	Superoxide dismutase [Cu-Zn] precursor (EC 1.15.1.1)	Oxidative stress, Protection from Reactive Oxygen Species		PEG1170	519	914	1575	1997		914	1365.07	1069.5	1139.59	219.574	0.578529	991.805	191.099	0.226488		P	K04565
PEG1171	fig|6666666.88372.peg.1171	peg.1171	CDS	LMR001-004	400446	399463	984	Predicted NAD regulator in Alphaproteobacteria	- none -		PEG1171	984	2025	1750	3782		2025	1513.69	2433.03	1768.35	179.711	-0.418444	2228.03	226.425	0.266245		R
PEG1172	fig|6666666.88372.peg.1172	peg.1172	CDS	LMR001-004	400975	400433	543	Mll1302 protein	- none -		PEG1172	543	990	711	1573		990	589.532	743.478	790.182	145.522	-0.749069	867.155	159.697	-0.414351		R
PEG1173	fig|6666666.88372.peg.1173	peg.1173	CDS	LMR001-004	401586	400978	609	COG1896: Predicted hydrolases of HD superfamily	- none -		PEG1173	609	1789	1397	2725		1789	1220.05	1586.02	1505.33	247.18	-0.553508	1688.31	277.227	-0.175035		R	K06952
PEG1174	fig|6666666.88372.peg.1174	peg.1174	CDS	LMR001-004	402431	401583	849	Folate-dependent protein for Fe/S cluster synthesis/repair in oxidative stress	Iron-sulfur cluster assembly		PEG1174	849	3354	2608	4287		3354	2265.85	2844.56	2811.61	331.167	-0.567284	3100.97	365.25	-0.239126		R	K06980
PEG1175	fig|6666666.88372.peg.1175	peg.1175	CDS	LMR001-004	403309	402554	756	FIG00451125: hypothetical protein	- none -		PEG1175	756	2327	5887	3948		2327	5068.29	2563	3698.19	489.179	1.12235	2445.55	323.485	0.138687
PEG1176	fig|6666666.88372.peg.1176	peg.1176	CDS	LMR001-004	403594	403325	270	FIG00984290: hypothetical protein	- none -		PEG1176	270	4418	7431	6521		4418	6324.45	4639.33	5370.08	1988.92	0.518295	4527.52	1676.86	0.0712743
PEG1177	fig|6666666.88372.peg.1177	peg.1177	CDS	LMR001-004	404199	403753	447	hypothetical protein	- none -		PEG1177	447	858	748	1395		858	624.222	617.715	740.63	165.689	-0.4573	737.376	164.961	-0.472418		S
PEG1178	fig|6666666.88372.peg.1178	peg.1178	CDS	LMR001-004	404666	404196	471	Nudix hydrolase family protein	- none -		PEG1178	471	619	589	1223		619	486.171	499.146	552.806	117.369	-0.349503	559.294	118.746	-0.311504		F
PEG1179	fig|6666666.88372.peg.1179	peg.1179	CDS	LMR001-004	404632	405507	876	Gifsy-2 prophage protein	- none -		PEG1179	869	2435	2868	3594		2435	2505.76	2284.99	2468.98	284.118	0.0429847	2358.59	271.415	-0.0900792		S
PEG1180	fig|6666666.88372.peg.1180	peg.1180	CDS	LMR001-004	405701	405504	198	HYPOTHETICAL UNKNOWN PROTEIN	- none -		PEG1180	198	950	1015	1379		950	897.84	606.799	924.223	466.779	-0.0823866	778.702	393.284	-0.647626
PEG1181	fig|6666666.88372.peg.1181	peg.1181	CDS	LMR001-004	406170	405985	186	hypothetical protein	- none -		PEG1181	149	7	23	51		7	16.5027	12.1466	11.7505	7.88627	1.2376	9.5725	6.4245	0.795449
PEG1182	fig|6666666.88372.peg.1182	peg.1182	CDS	LMR001-004	406216	407616	1401	Cysteinyl-tRNA synthetase (EC 6.1.1.16)	Zinc regulated enzymes, tRNA aminoacylation, Cys		PEG1182	1401	4619	8464	7446		4619	7153.51	5399.58	5888.66	420.318	0.629569	5011.7	357.723	0.223766		J	K01883
PEG1183	fig|6666666.88372.peg.1183	peg.1183	CDS	LMR001-004	407756	408142	387	Gfa-like protein	- none -		PEG1183	387	1168	1951	1919		1168	1680.51	1022.73	1423.66	367.871	0.526331	1094.77	282.886	-0.190142		S
PEG1184	fig|6666666.88372.peg.1184	peg.1184	CDS	LMR001-004	408139	408615	477	Gfa-like protein	- none -		PEG1184	477	2173	3388	3191		2173	3001.29	1990.44	2587	542.347	0.466093	2081.57	436.388	-0.126404		S
PEG1185	fig|6666666.88372.peg.1185	peg.1185	CDS	LMR001-004	408588	409115	528	Gfa-like protein	- none -		PEG1185	528	2051	2941	3162		2051	2577.48	1966.53	2314.32	438.319	0.329522	2008.84	380.463	-0.0607916		S
PEG1186	fig|6666666.88372.peg.1186	peg.1186	CDS	LMR001-004	409112	410074	963	Proline iminopeptidase (EC 3.4.11.5)	Proline, 4-hydroxyproline uptake and utilization		PEG1186	963	3635	5479	5730		3635	4679.65	4022.72	4159.4	431.921	0.3628	3830.93	397.812	0.144568		R	K01259
PEG1187	fig|6666666.88372.peg.1187	peg.1187	CDS	LMR001-004	410127	411743	1617	(R)-citramalate synthase (EC 2.3.1.182)	Branched-Chain Amino Acid Biosynthesis		PEG1187	1617	3196	4242	5737		3196	3643.08	4033.27	3420.99	211.564	0.187585	3616.08	223.629	0.334378		E	K01649
PEG1188	fig|6666666.88372.peg.1188	peg.1188	CDS	LMR001-004	411921	412859	939	Protein rarD	- none -		PEG1188	939	6904	2692	8403		6904	2335.94	6211.28	4619.17	491.924	-1.5631	6556.84	698.279	-0.152207		R	K05786
PEG1189	fig|6666666.88372.peg.1189	peg.1189	CDS	LMR001-004	413501	412869	633	Lysine decarboxylase family	- none -		PEG1189	633	3051	3280	4008		3051	2918.13	2614.05	2983.01	471.25	-0.0627676	2830.97	447.231	-0.221526		R	K06966
PEG1190	fig|6666666.88372.peg.1190	peg.1190	CDS	LMR001-004	413734	415437	1704	LysM domain protein	- none -		PEG1190	1704	14199	13401	16535		14199	10885.4	12954.9	12538	735.796	-0.382545	13572.7	796.522	-0.131436		S
PEG1191	fig|6666666.88372.peg.1191	peg.1191	CDS	LMR001-004	415611	417500	1890	ABC transporter HlyB/MsbA family	- none -		PEG1191	1890	6097	4706	8498		6097	4014.96	6301.16	5055.16	267.469	-0.602328	6198.26	327.95	0.0479036		O	K06147
PEG1192	fig|6666666.88372.peg.1192	peg.1192	CDS	LMR001-004	417604	418302	699	Phosphatidylserine decarboxylase (EC 4.1.1.65)	Glycerolipid and Glycerophospholipid Metabolism in Bacteria		PEG1192	699	4322	6499	6594		4322	5607.55	4702	4966.34	710.493	0.374624	4513.57	645.718	0.120529		I	K01613
PEG1193	fig|6666666.88372.peg.1193	peg.1193	CDS	LMR001-004	418311	419171	861	CDP-diacylglycerol--serine O-phosphatidyltransferase (EC 2.7.8.8)	Glycerolipid and Glycerophospholipid Metabolism in Bacteria		PEG1193	861	3462	5056	5548		3462	4303.88	3874.65	3881.64	450.829	0.315119	3667.02	425.902	0.163545		I	K17103
PEG1194	fig|6666666.88372.peg.1194	peg.1194	CDS	LMR001-004	420055	419315	741	small molecule metabolism	- none -		PEG1194	741	3913	5212	5290		3913	4435.5	3655.1	4176.46	563.625	0.179193	3786.26	510.966	-0.0999932		IQR
PEG1195	fig|6666666.88372.peg.1195	peg.1195	CDS	LMR001-004	421556	420066	1491	Amidophosphoribosyltransferase (EC 2.4.2.14)	Colicin V and Bacteriocin Production Cluster, De Novo Purine Biosynthesis		PEG1195	1491	12001	12155	15388		12001	10040.5	12009.2	11017.7	738.95	-0.256604	12002.1	804.97	0.00170957		F	K00764
PEG1196	fig|6666666.88372.peg.1196	peg.1196	CDS	LMR001-004	422300	421701	600	Colicin V production protein	Colicin V and Bacteriocin Production Cluster		PEG1196	600	5639	8411	7792		5639	7104.61	5690.55	6370.5	1061.75	0.333988	5663.46	943.911	0.0138009		R	K03558
PEG1197	fig|6666666.88372.peg.1197	peg.1197	CDS	LMR001-004	423845	422445	1401	DNA repair protein RadA	DNA repair, bacterial, Proteolysis in bacteria, ATP-dependent		PEG1197	1401	4512	5379	6394		4512	4588.12	4542.38	4548.15	324.636	0.0253632	4525.27	323.003	0.0109069		O	K04485
PEG1198	fig|6666666.88372.peg.1198	peg.1198	CDS	LMR001-004	425103	423964	1140	Alanine racemase (EC 5.1.1.1)	Alanine biosynthesis, Pyruvate Alanine Serine Interconversions		PEG1198	1140	1792	1940	3649		1792	1672.47	2323.49	1731.54	151.889	-0.098471	2057.05	180.443	0.375843		M	K01775
PEG1199	fig|6666666.88372.peg.1199	peg.1199	CDS	LMR001-004	425244	426101	858	Transcriptional regulator, AraC family	- none -		PEG1199	846	1593	2250	2819		1593	1966.3	1663.55	1779.25	210.314	0.304454	1627.88	192.421	0.0632352		K
PEG1200	fig|6666666.88372.peg.1200	peg.1200	CDS	LMR001-004	426176	426877	702	FIG01076189: hypothetical protein	- none -		PEG1200	702	2324	1978	2264		2324	1705.52	1265.54	2014.13	286.913	-0.445611	1794.14	255.575	-0.876073		E
PEG1201	fig|6666666.88372.peg.1201	peg.1201	CDS	LMR001-004	426874	427179	306	FIG00363986: hypothetical protein	- none -		PEG1201	306	925	1354	1187		925	1190.97	476.25	1057.83	345.697	0.365081	700.474	228.913	-0.957265		S
PEG1202	fig|6666666.88372.peg.1202	peg.1202	CDS	LMR001-004	428720	427221	1500	Replicative DNA helicase (EC 3.6.1.-)	- none -		PEG1202	1500	6996	12338	10182		6996	10152.1	7815.81	8575.26	571.684	0.536676	7407.11	493.808	0.159366		L	K02314
PEG1203	fig|6666666.88372.peg.1203	peg.1203	CDS	LMR001-004	429626	429051	576	LSU ribosomal protein L9p	Ribosome LSU bacterial		PEG1203	576	8781	32921	15487		8781	23323.9	12097.1	16057.1	2787.68	1.40784	10443.7	1813.14	0.460689		J	K02939
PEG1204	fig|6666666.88372.peg.1204	peg.1204	CDS	LMR001-004	430614	429661	954	FIG003573: hypothetical protein	- none -		PEG1204	954	1193	3150	2805		1193	2802.97	1652.97	1998.48	209.484	1.23117	1423.48	149.211	0.46927
PEG1205	fig|6666666.88372.peg.1205	peg.1205	CDS	LMR001-004	431056	430808	249	SSU ribosomal protein S18p @ SSU ribosomal protein S18p, zinc-independent	Ribosome SSU bacterial, Ribosome SSU bacterial		PEG1205	249	3858	13374	7672		3858	10865.1	5585.54	7359.95	2955.8	1.49498	4720.16	1895.65	0.535047		J	K02963
PEG1206	fig|6666666.88372.peg.1206	peg.1206	CDS	LMR001-004	431528	431082	447	SSU ribosomal protein S6p	Ribosome SSU bacterial		PEG1206	447	13509	46680	24660		13509	31257.8	19959.8	22389.2	5008.78	1.20904	16740.3	3745.03	0.561926		J	K02990
PEG1207	fig|6666666.88372.peg.1207	peg.1207	CDS	LMR001-004	431906	432244	339	Ferredoxin	Inorganic Sulfur Assimilation, Soluble cytochromes and functionally related electron carriers		PEG1207	338	308	891	678		308	751.544	258.998	529.932	156.784	1.28544	283.658	83.9226	-0.251481
PEG1208	fig|6666666.88372.peg.1208	peg.1208	CDS	LMR001-004	433310	432267	1044	small molecule metabolism	- none -		PEG1208	1044	4169	8187	7709		4169	6914.73	5614.72	5541.71	530.815	0.730077	4891.71	468.554	0.429618		C
PEG1209	fig|6666666.88372.peg.1209	peg.1209	CDS	LMR001-004	433744	434688	945	Malonyl CoA-acyl carrier protein transacylase (EC 2.3.1.39)	Fatty Acid Biosynthesis FASII		PEG1209	945	5570	8037	7470		5570	6793.8	5413.47	6182.83	654.268	0.286061	5492.66	581.234	-0.0416054		I	K00645
PEG1210	fig|6666666.88372.peg.1210	peg.1210	CDS	LMR001-004	434729	435466	738	3-oxoacyl-[acyl-carrier protein] reductase (EC 1.1.1.100)	CBSS-246196.1.peg.364, Fatty Acid Biosynthesis FASII		PEG1210	738	8096	14121	11721		8096	11376.2	9095.64	9733.59	1318.91	0.491639	8593.3	1164.4	0.168865		IQR	K00059
PEG1211	fig|6666666.88372.peg.1211	peg.1211	CDS	LMR001-004	435757	436041	285	Acyl carrier protein	Fatty Acid Biosynthesis FASII, Glycerolipid and Glycerophospholipid Metabolism in Bacteria		PEG1211	285	30829	46388	37452		30829	31079.2	31314.9	30955.6	10861.6	0.0115284	31073.4	10903	0.0224286		IQ	K02078
PEG1212	fig|6666666.88372.peg.1212	peg.1212	CDS	LMR001-004	436259	437524	1266	3-oxoacyl-[acyl-carrier-protein] synthase, KASII (EC 2.3.1.179)	- none -		PEG1212	1266	11866	22244	14230		11866	16835.9	11075.6	14346.8	1133.24	0.505718	11466.7	905.739	-0.0984357		IQ	K09458
PEG1213	fig|6666666.88372.peg.1213	peg.1213	CDS	LMR001-004	437521	437718	198	hypothetical protein	- none -		PEG1213	197	218	798	553		218	667.442	208.904	442.607	224.673	1.61583	213.337	108.293	-0.0599724
PEG1214	fig|6666666.88372.peg.1214	peg.1214	CDS	LMR001-004	437913	439100	1188	FIG004453: protein YceG like	CBSS-323097.3.peg.2594, Cluster containing Alanyl-tRNA synthetase, tRNA modification Bacteria		PEG1214	1188	8540	9902	10517		8540	8375.66	8108.13	8453.33	711.56	-0.0265117	8319.56	700.3	-0.0733464		R	K07082
PEG1215	fig|6666666.88372.peg.1215	peg.1215	CDS	LMR001-004	439151	440170	1020	Protein YicC	CBSS-323097.3.peg.2594		PEG1215	1019	2136	3602	3745		2136	3165.66	2397.9	2651.81	260.237	0.56627	2267.93	222.564	0.165533		S
PEG1216	fig|6666666.88372.peg.1216	peg.1216	CDS	LMR001-004	440174	440833	660	Guanylate kinase (EC 2.7.4.8)	CBSS-323097.3.peg.2594, Purine conversions		PEG1216	660	2505	2882	3221		2505	2519.63	2013.42	2512.87	380.738	0.00776194	2259.76	342.388	-0.315803		F	K00942
PEG1217	fig|6666666.88372.peg.1217	peg.1217	CDS	LMR001-004	441676	440852	825	SSU rRNA (adenine(1518)-N(6)/adenine(1519)-N(6))-dimethyltransferase (EC 2.1.1.182)	ECSIG4-SIG7, Possible RNA modification and stress response cluster, RNA methylation, Ribosome biogenesis bacterial		PEG1217	825	1011	1685	2225		1011	1463.46	1230.3	1237.52	150.002	0.532773	1120.94	135.872	0.282405		J	K02528
PEG1218	fig|6666666.88372.peg.1218	peg.1218	CDS	LMR001-004	442704	441676	1029	4-hydroxythreonine-4-phosphate dehydrogenase (EC 1.1.1.262)	ECSIG4-SIG7, Possible RNA modification and stress response cluster, Pyridoxin (Vitamin B6) Biosynthesis		PEG1218	1029	2196	3049	4042		2196	2699.65	2643.43	2448.76	237.974	0.296673	2420.64	235.242	0.266309		H	K00097
PEG1219	fig|6666666.88372.peg.1219	peg.1219	CDS	LMR001-004	443653	442715	939	Survival protein SurA precursor (Peptidyl-prolyl cis-trans isomerase SurA) (EC 5.2.1.8)	ECSIG4-SIG7, Peptidyl-prolyl cis-trans isomerase, Periplasmic Stress Response, Possible RNA modification and stress response cluster		PEG1219	939	11188	15346	15663		11188	12205.7	12247	11700	1246.01	0.124782	11720.7	1248.21	0.129651		O	K03771
PEG1220	fig|6666666.88372.peg.1220	peg.1220	CDS	LMR001-004	446217	443869	2349	Outer membrane protein Imp, required for envelope biogenesis / Organic solvent tolerance protein precursor	ECSIG4-SIG7, Possible RNA modification and stress response cluster, Possible RNA modification and stress response cluster		PEG1220	2349	38948	51852	49833		38948	34092.3	42674.1	36498.4	1553.79	-0.190491	40789.3	1736.45	0.133424		M	K04744
PEG1221	fig|6666666.88372.peg.1221	peg.1221	CDS	LMR001-004	447299	446217	1083	Permease, YjgP/YjgQ family	- none -		PEG1221	1083	5016	5725	7946		5016	4916.3	5813.02	4964.08	458.364	-0.027778	5412.45	499.764	0.213939		R	K11720
PEG1222	fig|6666666.88372.peg.1222	peg.1222	CDS	LMR001-004	448468	447296	1173	FIG000988: Predicted permease	- none -		PEG1222	1173	5936	5289	8254		5936	4499.97	6090.09	5214.61	444.554	-0.397934	6009.67	512.334	0.0386139		R	K07091
PEG1223	fig|6666666.88372.peg.1223	peg.1223	CDS	LMR001-004	448707	448501	207	hypothetical protein	- none -		PEG1223	193	225	336	357		225	278.562	131.619	251.734	130.432	0.308682	178.262	92.3639	-0.772948
PEG1224	fig|6666666.88372.peg.1224	peg.1224	CDS	LMR001-004	448781	450274	1494	Cytosol aminopeptidase PepA (EC 3.4.11.1)	Aminopeptidases (EC 3.4.11.-), Dehydrogenase complexes		PEG1224	1494	12447	10728	13930		12447	9038.68	10842.5	10741.9	719.004	-0.461399	11643.8	779.373	-0.198882		E	K01255
PEG1225	fig|6666666.88372.peg.1225	peg.1225	CDS	LMR001-004	450310	450759	450	DNA polymerase III chi subunit (EC 2.7.7.7)	- none -		PEG1225	450	2136	1999	2510		2136	1728.43	1433.41	1933.2	429.599	-0.306775	1785.69	396.819	-0.576783		L	K02339
PEG1226	fig|6666666.88372.peg.1226	peg.1226	CDS	LMR001-004	451754	450828	927	Uncharacterized oxidoreductase ydgJ (EC 1.-.-.-)	- none -		PEG1226	927	2162	2540	2924		2162	2211.15	1754.19	2186.93	235.915	0.0319498	1958.46	211.268	-0.302039		R	K00035
PEG1227	fig|6666666.88372.peg.1227	peg.1227	CDS	LMR001-004	451934	452773	840	GCN5-related N-acetyltransferase	- none -		PEG1227	839	1074	3873	2248		1074	3367.52	1252.4	2220.76	264.691	1.64871	1163.19	138.641	0.221714
PEG1228	fig|6666666.88372.peg.1228	peg.1228	CDS	LMR001-004	454847	452958	1890	ABC transporter ATP-binding protein uup	- none -		PEG1228	1890	2762	7030	5388		2762	6022.48	3737.92	4391.53	232.356	1.12539	3249.25	171.918	0.437267		R	K06158
PEG1229	fig|6666666.88372.peg.1229	peg.1229	CDS	LMR001-004	455171	455446	276	HYPOTHETICAL/UNKNOWN SIGNAL PEPTIDE PROTEIN	- none -		PEG1229	276	29138	6131	24895		29138	5295.64	20163.3	17201.4	6232.39	-2.4585	24635.3	8925.82	-0.52964
PEG1230	fig|6666666.88372.peg.1230	peg.1230	CDS	LMR001-004	455518	455802	285	HYPOTHETICAL/UNKNOWN SIGNAL PEPTIDE PROTEIN	- none -		PEG1230	285	27880	5169	23354		27880	4393.53	18775	16127.4	5658.73	-2.66481	23318.1	8181.79	-0.569446
PEG1231	fig|6666666.88372.peg.1231	peg.1231	CDS	LMR001-004	456176	455994	183	hypothetical protein	- none -		PEG1231	183	365	129	404		365	95.3639	149.202	230.059	125.715	-1.93541	256.978	140.425	-1.28966
PEG1232	fig|6666666.88372.peg.1232	peg.1232	CDS	LMR001-004	456129	458678	2550	Long-chain-fatty-acid--CoA ligase (EC 6.2.1.3)	Biotin biosynthesis, Fatty acid metabolism cluster		PEG1232	2550	3833	1706	5473		3833	1478.98	3811.46	2658.02	104.236	-1.37541	3824.27	149.971	-0.0096626		IQ
PEG1233	fig|6666666.88372.peg.1233	peg.1233	CDS	LMR001-004	459271	459960	690	lignin beta-ether hydrolase	- none -		PEG1233	690	14410	3622	11537		14410	3178.14	8948.47	8799.65	1275.31	-2.18193	11684.8	1693.45	-0.688473		O
PEG1234	fig|6666666.88372.peg.1234	peg.1234	CDS	LMR001-004	460065	460487	423	Nucleoside diphosphate kinase (EC 2.7.4.6)	Purine conversions, pyrimidine conversions		PEG1234	423	7959	14424	11157		7959	11575.6	8649.52	9768.61	2309.36	0.53996	8305.56	1963.49	0.119563		F	K00940
PEG1235	fig|6666666.88372.peg.1235	peg.1235	CDS	LMR001-004	461062	460559	504	FIG00984093: hypothetical protein	- none -		PEG1235	503	607	965	1127		607	840.324	443.743	723.53	143.843	0.469876	525.24	104.421	-0.451345
PEG1236	fig|6666666.88372.peg.1236	peg.1236	CDS	LMR001-004	461616	461059	558	FIG00985838: hypothetical protein	- none -		PEG1236	556	181	178	564		181	136.127	213.108	158.631	28.5307	-0.412099	197.121	35.4534	0.234524		R
PEG1237	fig|6666666.88372.peg.1237	peg.1237	CDS	LMR001-004	461683	462579	897	High-affinity branched-chain amino acid transport system permease protein LivH (TC 3.A.1.4.1)	ABC transporter branched-chain amino acid (TC 3.A.1.4.1)		PEG1237	897	717	621	1261		717	512.535	526.687	615.165	68.5802	-0.48592	622.24	69.3691	-0.446626		E	K01997
PEG1238	fig|6666666.88372.peg.1238	peg.1238	CDS	LMR001-004	463092	462622	471	Molybdenum cofactor biosynthesis protein MoaE	Molybdenum cofactor biosynthesis, ar-104-EC Molybdenum cofactor biosynthesis moaABCDE		PEG1238	471	1843	1446	2485		1843	1255.03	1414.8	1550.02	329.092	-0.555906	1629.91	346.052	-0.383037		H	K03635
PEG1239	fig|6666666.88372.peg.1239	peg.1239	CDS	LMR001-004	463358	463098	261	Molybdenum cofactor biosynthesis protein MoaD	Molybdenum cofactor biosynthesis, ar-104-EC Molybdenum cofactor biosynthesis moaABCDE		PEG1239	261	1183	1023	1582		1183	909.474	749.638	1046.26	400.865	-0.379397	966.34	370.245	-0.658235		H	K03636
PEG1240	fig|6666666.88372.peg.1240	peg.1240	CDS	LMR001-004	463963	463355	609	CDP-diacylglycerol--glycerol-3-phosphate 3-phosphatidyltransferase (EC 2.7.8.5)	Glycerolipid and Glycerophospholipid Metabolism in Bacteria		PEG1240	609	5545	4429	7842		5545	3779.15	5721.29	4662.7	765.632	-0.553455	5633.77	925.086	0.0448251		I	K00995
PEG1241	fig|6666666.88372.peg.1241	peg.1241	CDS	LMR001-004	466217	464196	2022	Excinuclease ABC subunit C	DNA repair, UvrABC system		PEG1241	2022	3626	5313	5738		3626	4521.45	4033.27	4071.94	201.382	0.319829	3827.85	189.31	0.154994		L	K03703
PEG1242	fig|6666666.88372.peg.1242	peg.1242	CDS	LMR001-004	466978	466214	765	FolM Alternative dihydrofolate reductase 1	Folate Biosynthesis		PEG1242	765	1594	2515	2272		1594	2192.55	1270.29	1892.38	247.37	0.461582	1431.25	187.091	-0.325877		IQR
PEG1243	fig|6666666.88372.peg.1243	peg.1243	CDS	LMR001-004	467343	467981	639	Surface antigen	- none -		PEG1243	639	96175	110030	156702		96175	63033.3	143478	79597.2	12456.5	-0.609342	119820	18751.1	0.577303		M	K16079
PEG1244	fig|6666666.88372.peg.1244	peg.1244	CDS	LMR001-004	468637	468047	591	Glutathione S-transferase family protein	Glutathione: Non-redox reactions, Scaffold proteins for [4Fe-4S] cluster assembly (MRP family)		PEG1244	591	9094	6568	11828		9094	5657.01	9180.78	7378.07	1248.4	-0.685689	9139.95	1546.52	0.0128873		O	K00799
PEG1245	fig|6666666.88372.peg.1245	peg.1245	CDS	LMR001-004	469380	468655	726	Ribonuclease T2 family protein	- none -		PEG1245	726	4156	2259	5071		4156	1975.57	3481.95	3067.34	422.499	-1.074	3820.53	526.243	-0.256379		J	K01166
PEG1246	fig|6666666.88372.peg.1246	peg.1246	CDS	LMR001-004	469805	469362	444	hypothetical protein	- none -		PEG1246	444	6942	3164	8143		6942	2816.1	5990.84	4875.18	1098.01	-1.30004	6462.55	1455.53	-0.210983		R
PEG1247	fig|6666666.88372.peg.1247	peg.1247	CDS	LMR001-004	470726	469866	861	Protein involved in catabolism of external DNA	DNA processing cluster		PEG1247	861	817	1591	1991		817	1381.76	1066.67	1099.17	127.662	0.758836	941.628	109.364	0.385448		R	K07115
PEG1248	fig|6666666.88372.peg.1248	peg.1248	CDS	LMR001-004	470795	472927	2133	Anaerobic dehydrogenases, typically selenocysteine-containing	Anaerobic respiratory reductases		PEG1248	2133	15210	10740	17043		15210	9038.68	13406.5	12122.1	568.311	-0.750407	14306	670.699	-0.181653		C
PEG1249	fig|6666666.88372.peg.1249	peg.1249	CDS	LMR001-004	472957	473553	597	Nudix hydrolase family protein YffH	Nudix proteins (nucleoside triphosphate hydrolases)		PEG1249	597	2660	1724	3203		2660	1494.56	2002.33	2077.64	348.014	-0.832099	2331.53	390.541	-0.41014		LR	K01515
PEG1250	fig|6666666.88372.peg.1250	peg.1250	CDS	LMR001-004	473649	476258	2610	membrane protein, putative	- none -		PEG1250	2610	3535	3558	6548		3535	3128.5	4664.26	3330.17	127.593	-0.174945	4098.04	157.013	0.40123		S	K14205
PEG1251	fig|6666666.88372.peg.1251	peg.1251	CDS	LMR001-004	476255	477634	1380	virulence protein	- none -		PEG1251	1380	1600	1791	3386		1600	1546.67	2135.38	1573.12	113.994	-0.0485045	1867.47	135.324	0.416821		U
PEG1252	fig|6666666.88372.peg.1252	peg.1252	CDS	LMR001-004	478363	477695	669	Phosphoribosylglycinamide formyltransferase (EC 2.1.2.2)	5-FCL-like protein, De Novo Purine Biosynthesis		PEG1252	669	754	1909	2005		754	1645.07	1075.15	1199.21	179.255	1.12675	914.254	136.66	0.513139		F	K11175
PEG1253	fig|6666666.88372.peg.1253	peg.1253	CDS	LMR001-004	479511	478360	1152	Phosphoribosylformylglycinamidine cyclo-ligase (EC 6.3.3.1)	De Novo Purine Biosynthesis		PEG1253	1150	3035	6663	5945		3035	5742.87	4191	4388.38	381.598	0.920601	3612.44	314.126	0.466124		F	K01933
PEG1254	fig|6666666.88372.peg.1254	peg.1254	CDS	LMR001-004	479671	480792	1122	Putative permease often clustered with de novo purine synthesis	- none -		PEG1254	1122	2103	2853	3577		2103	2485.36	2272.53	2294.57	204.507	0.240474	2188.16	195.023	0.11132		R
PEG1255	fig|6666666.88372.peg.1255	peg.1255	CDS	LMR001-004	480839	481504	666	Chromosomal replication initiator protein DnaA	Cell Division Subsystem including YidCD, DNA replication cluster 1		PEG1255	666	774	974	1356		774	850.914	589.363	812.688	122.025	0.135818	681.912	102.389	-0.394038		L
PEG1256	fig|6666666.88372.peg.1256	peg.1256	CDS	LMR001-004	481561	483780	2220	Polyphosphate kinase (EC 2.7.4.1)	High affinity phosphate transporter and control of PHO regulon, Phosphate metabolism, Polyphosphate, Purine conversions		PEG1256	2220	12224	14341	16012		12224	11531.3	12520	11874.7	534.895	-0.0834467	12369	557.162	0.0352265		P	K00937
PEG1257	fig|6666666.88372.peg.1257	peg.1257	CDS	LMR001-004	483768	485315	1548	Exopolyphosphatase (EC 3.6.1.11)	Phosphate metabolism, Polyphosphate		PEG1257	1548	4795	8685	7222		4795	7338.15	5222.62	6067.74	391.973	0.613183	5009.98	323.642	0.122539		FP	K01524
PEG1258	fig|6666666.88372.peg.1258	peg.1258	CDS	LMR001-004	486731	485373	1359	Glycerophosphoryl diester phosphodiesterase (EC 3.1.4.46)	CBSS-176299.4.peg.1996A, Glycerol and Glycerol-3-phosphate Uptake and Utilization		PEG1258	1355	382	634	1392		382	522.84	615.541	452.392	33.3869	0.453007	498.742	36.8076	0.688492		S
PEG1259	fig|6666666.88372.peg.1259	peg.1259	CDS	LMR001-004	486931	487338	408	Mlr5159 protein	- none -		PEG1259	407	319	1377	676		319	1206.53	258.46	762.842	187.43	1.91854	288.807	70.9599	-0.304312		S
PEG1260	fig|6666666.88372.peg.1260	peg.1260	CDS	LMR001-004	488377	487310	1068	Adenylate cyclase (EC 4.6.1.1)	cAMP signaling in bacteria		PEG1260	1068	2110	2956	3626		2110	2599.89	2304.02	2354.26	220.436	0.302146	2206.33	206.585	0.12785		T	K01768
PEG1261	fig|6666666.88372.peg.1261	peg.1261	CDS	LMR001-004	489693	488542	1152	Ribonuclease D (EC 3.1.26.3)	tRNA processing		PEG1261	1152	3990	5577	5519		3990	4763.6	3853.52	4376.93	379.941	0.255574	3921.88	340.441	-0.0503017		J	K03684
PEG1262	fig|6666666.88372.peg.1262	peg.1262	CDS	LMR001-004	491178	489775	1404	Multicopper oxidase	Copper homeostasis		PEG1262	1397	1427	1731	2990		1427	1497.95	1816.52	1461.78	104.637	0.0714161	1621.07	116.039	0.349604		Q
PEG1263	fig|6666666.88372.peg.1263	peg.1263	CDS	LMR001-004	492557	491319	1239	Transmembrane transport protein	- none -		PEG1263	1236	953	582	2194		953	480.532	1204.15	716.664	57.9825	-0.987534	1078.47	87.2551	0.337775		G
PEG1264	fig|6666666.88372.peg.1264	peg.1264	CDS	LMR001-004	492862	494649	1788	Aspartyl-tRNA synthetase (EC 6.1.1.12) @ Aspartyl-tRNA(Asn) synthetase (EC 6.1.1.23)	tRNA aminoacylation, Asp and Asn, tRNA aminoacylation, Asp and Asn		PEG1264	1788	11186	37748	17840		11186	26177.6	14042.6	18686	1045.08	1.22556	12618.5	705.731	0.327031		J	K01876
PEG1265	fig|6666666.88372.peg.1265	peg.1265	CDS	LMR001-004	494865	495245	381	Rhodanese domain protein	- none -		PEG1265	381	13400	6837	12767		13400	5873.79	9915.37	9635.28	2528.94	-1.18952	11656.1	3059.33	-0.434147		P
PEG1266	fig|6666666.88372.peg.1266	peg.1266	CDS	LMR001-004	496917	495289	1629	Heat shock protein 60 family chaperone GroEL	GroEL GroES		PEG1266	1628	8452	12646	12082		8452	10373.5	9377.15	9413.13	578.202	0.295398	8914.97	547.603	0.149723		O	K04077
PEG1267	fig|6666666.88372.peg.1267	peg.1267	CDS	LMR001-004	497267	497049	219	FIG01075262: hypothetical protein	- none -		PEG1267	219	633	1821	1208		633	1569.89	489.896	1101.15	502.81	1.31173	561.154	256.235	-0.368388
PEG1268	fig|6666666.88372.peg.1268	peg.1268	CDS	LMR001-004	497242	497418	177	hypothetical protein	- none -		PEG1268	177	95	111	215		95	80.6588	75.4355	87.8596	49.6382	-0.237014	85.248	48.1627	-0.333601
PEG1269	fig|6666666.88372.peg.1269	peg.1269	CDS	LMR001-004	498662	497469	1194	FIG00450156: hypothetical protein	- none -		PEG1269	1194	38393	22337	37468		38393	16901.5	31392.5	27636.1	2314.58	-1.18285	34881.6	2921.41	-0.289586
PEG1270	fig|6666666.88372.peg.1270	peg.1270	CDS	LMR001-004	499088	501349	2262	Topoisomerase IV subunit A (EC 5.99.1.-)	DNA topoisomerases, Type II, ATP-dependent, Resistance to fluoroquinolones		PEG1270	2262	19596	43289	23812		19596	29336.9	19211.4	24462.7	1081.46	0.582712	19399.9	857.646	-0.0280366		L	K02621
PEG1271	fig|6666666.88372.peg.1271	peg.1271	CDS	LMR001-004	501497	501847	351	Transcriptional regulator, ArsR family	CBSS-1085.1.peg.1363		PEG1271	352	625	1411	1137		625	1231.44	449.411	928.309	263.724	0.978025	537.292	152.64	-0.476219		K
PEG1272	fig|6666666.88372.peg.1272	peg.1272	CDS	LMR001-004	502828	501923	906	Permeases of the drug/metabolite transporter (DMT) superfamily	- none -		PEG1272	906	1780	1902	2652		1780	1637.43	1533.6	1707.85	188.505	-0.119052	1655.94	182.775	-0.213558
PEG1273	fig|6666666.88372.peg.1273	peg.1273	CDS	LMR001-004	503611	502832	780	Arginine-tRNA-protein transferase (EC 2.3.2.8)	Protein degradation		PEG1273	780	1872	1982	3245		1872	1709.84	2030.7	1790.26	229.521	-0.129701	1950.69	250.089	0.118414		O	K00685
PEG1274	fig|6666666.88372.peg.1274	peg.1274	CDS	LMR001-004	504218	503760	459	FIG00451006: hypothetical protein	- none -		PEG1274	459	3879	2238	4859		3879	1957.82	3328.06	2919.66	636.092	-0.98737	3604.78	785.356	-0.221934		S
PEG1275	fig|6666666.88372.peg.1275	peg.1275	CDS	LMR001-004	505346	504306	1041	Porphobilinogen synthase (EC 4.2.1.24)	Heme and Siroheme Biosynthesis, Zinc regulated enzymes		PEG1275	1041	11551	9561	14838		11551	8096.47	11556	9828.8	944.169	-0.513916	11558.6	1110.33	-0.00063671		H	K01698
PEG1276	fig|6666666.88372.peg.1276	peg.1276	CDS	LMR001-004	505544	505936	393	Permeases of the major facilitator superfamily	- none -		PEG1276	393	668	1086	1116		668	983.447	438.032	825.895	210.151	0.557256	553.188	140.76	-0.609554
PEG1277	fig|6666666.88372.peg.1277	peg.1277	CDS	LMR001-004	506067	506579	513	Transcriptional regulator, MarR family	- none -		PEG1277	513	6283	5407	8252		6283	4611.53	6090.09	5446.06	1061.61	-0.445652	6185.34	1205.72	-0.0444343		K
PEG1278	fig|6666666.88372.peg.1278	peg.1278	CDS	LMR001-004	506931	508259	1329	FIG00984076: hypothetical protein	- none -		PEG1278	1329	21091	24855	27211		21091	18444.9	22226.7	19765.6	1487.25	-0.193079	21656.5	1629.53	0.0759882		S
PEG1279	fig|6666666.88372.peg.1279	peg.1279	CDS	LMR001-004	508452	508315	138	hypothetical protein	- none -		PEG1279	133	28	41	113		28	28.9759	32.8565	28.4829	21.4157	0.0499511	30.4232	22.8746	0.231278
PEG1280	fig|6666666.88372.peg.1280	peg.1280	CDS	LMR001-004	508351	509739	1389	Serine hydroxymethyltransferase (EC 2.1.2.1)	5-FCL-like protein, Glycine Biosynthesis, Glycine and Serine Utilization, Photorespiration (oxidative C2 cycle), Serine-glyoxylate cycle, Serine Biosynthesis		PEG1280	1386	144971	66418	115581		144971	41636.9	104102	93257	6728.5	-1.7989	124490	8981.94	-0.476828		E	K00600
PEG1281	fig|6666666.88372.peg.1281	peg.1281	CDS	LMR001-004	509788	510225	438	Ribonucleotide reductase transcriptional regulator NrdR	Ribonucleotide reduction		PEG1281	438	16185	8451	12801		16185	7136.55	9938.69	11658.7	2661.8	-1.18098	13059.7	2981.68	-0.703155		K	K07738
PEG1282	fig|6666666.88372.peg.1282	peg.1282	CDS	LMR001-004	510244	511434	1191	Diaminohydroxyphosphoribosylaminopyrimidine deaminase (EC 3.5.4.26) / 5-amino-6-(5-phosphoribosylamino)uracil reductase (EC 1.1.1.193)	Riboflavin, FMN and FAD metabolism, Riboflavin, FMN and FAD metabolism, Riboflavin, FMN and FAD metabolism in plants, Riboflavin, FMN and FAD metabolism in plants, Riboflavin synthesis cluster, Riboflavin synthesis cluster		PEG1282	1191	10441	6568	10006		10441	5657.01	7652.24	8052.11	676.079	-0.885005	9049.72	759.842	-0.449163		H	K11752
PEG1283	fig|6666666.88372.peg.1283	peg.1283	CDS	LMR001-004	511434	512051	618	Riboflavin synthase eubacterial/eukaryotic (EC 2.5.1.9)	Riboflavin, FMN and FAD metabolism, Riboflavin, FMN and FAD metabolism in plants, Riboflavin synthesis cluster, riboflavin to FAD		PEG1283	618	8949	5608	10551		8949	4800.56	8129.18	6877.11	1112.8	-0.899272	8541.41	1382.11	-0.139366		H	K00793
PEG1284	fig|6666666.88372.peg.1284	peg.1284	CDS	LMR001-004	512514	512164	351	HYPOTHETICAL TRANSMEMBRANE PROTEIN	- none -		PEG1284	351	5332	5466	7171		5332	4668.98	5182.53	5001.16	1424.83	-0.191936	5257.94	1497.99	-0.0413858
PEG1285	fig|6666666.88372.peg.1285	peg.1285	CDS	LMR001-004	513382	512846	537	putative acetyltransferase protein	- none -		PEG1285	537	1893	1589	2329		1893	1378.44	1314.35	1635.39	304.542	-0.457138	1603.35	298.575	-0.525828		J
PEG1286	fig|6666666.88372.peg.1286	peg.1286	CDS	LMR001-004	513921	513418	504	FIG00983544: hypothetical protein	- none -		PEG1286	504	1613	1317	2341		1613	1164.39	1321.94	1389.37	275.67	-0.471386	1468.15	291.299	-0.288306		S
PEG1287	fig|6666666.88372.peg.1287	peg.1287	CDS	LMR001-004	514207	513989	219	hypothetical protein	- none -		PEG1287	211	11	27	85		11	19.1817	23.0769	15.0859	7.1497	0.80353	17.0335	8.07274	1.07025
PEG1288	fig|6666666.88372.peg.1288	peg.1288	CDS	LMR001-004	514240	514701	462	6,7-dimethyl-8-ribityllumazine synthase (EC 2.5.1.78)	Riboflavin, FMN and FAD metabolism, Riboflavin, FMN and FAD metabolism in plants, Riboflavin synthesis cluster		PEG1288	462	2397	4895	3717		2397	4170.41	2377.22	3284.62	710.957	0.797855	2388.02	516.888	-0.0130598		H	K00794
PEG1289	fig|6666666.88372.peg.1289	peg.1289	CDS	LMR001-004	514734	515180	447	Transcription termination protein NusB	Riboflavin synthesis cluster, Transcription factors bacterial		PEG1289	447	2050	4168	3230		2050	3587.9	2019.22	2819.53	630.767	0.806697	2035.19	455.3	-0.0226447		K	K03625
PEG1290	fig|6666666.88372.peg.1290	peg.1290	CDS	LMR001-004	515185	516414	1230	MFS permease	- none -		PEG1290	1230	1560	3060	3811		1560	2715.11	2454.18	2137.33	173.767	0.79988	2006.87	163.16	0.65411		G
PEG1291	fig|6666666.88372.peg.1291	peg.1291	CDS	LMR001-004	516615	518750	2136	Pyrophosphate-energized proton pump (EC 3.6.1.1)	Phosphate metabolism		PEG1291	2136	82819	14001	62124		82819	11288.1	53918.4	47041.2	2202.3	-2.87472	68356.3	3200.2	-0.618752		C	K15987
PEG1292	fig|6666666.88372.peg.1292	peg.1292	CDS	LMR001-004	519324	518818	507	Outer membrane lipoprotein OmlA	Ubiquinol-cytochrome C chaperone locus		PEG1292	507	8318	12742	12565		8318	10433.5	9754.98	9375.55	1849.22	0.326972	9036.31	1782.31	0.229965		J
PEG1293	fig|6666666.88372.peg.1293	peg.1293	CDS	LMR001-004	519462	519998	537	Ubiquinol-cytochrome C chaperone	CBSS-176299.3.peg.2475, Ubiquinol-cytochrome C chaperone locus		PEG1293	537	1766	2704	2457		1766	2347.32	1396.9	2056.68	382.994	0.410498	1581.47	294.501	-0.338282		S	K17662
PEG1294	fig|6666666.88372.peg.1294	peg.1294	CDS	LMR001-004	520075	520626	552	Conserved hypothetical protein, gene in Ubiquinol-cytochrome C chaperone locus	CBSS-176299.3.peg.2475, Ubiquinol-cytochrome C chaperone locus		PEG1294	552	1930	3110	2835		1930	2766.82	1679.71	2349.39	425.615	0.518156	1805.84	327.145	-0.20186		R
PEG1295	fig|6666666.88372.peg.1295	peg.1295	CDS	LMR001-004	520816	521859	1044	Phosphate:acyl-ACP acyltransferase PlsX	Glycerolipid and Glycerophospholipid Metabolism in Bacteria		PEG1295	1044	8003	16355	10968		8003	12927.9	8481.97	10463.1	1002.21	0.692712	8240.16	789.287	0.0846986		I	K03621
PEG1296	fig|6666666.88372.peg.1296	peg.1296	CDS	LMR001-004	521878	522849	972	3-oxoacyl-[acyl-carrier-protein] synthase, KASIII (EC 2.3.1.180)	- none -		PEG1296	972	4786	8999	7148		4786	7602.05	5156.53	6194.18	637.261	0.667478	4971.42	511.462	0.107489		I	K00648
PEG1297	fig|6666666.88372.peg.1297	peg.1297	CDS	LMR001-004	523031	523282	252	Integration host factor alpha subunit	DNA structural proteins, bacterial		PEG1297	252	6666	6635	8249		6666	5717.73	6073.16	6192.9	2457.5	-0.221827	6370.61	2528.02	-0.134821		L	K04764
PEG1298	fig|6666666.88372.peg.1298	peg.1298	CDS	LMR001-004	523413	523943	531	Transcriptional regulator, MerR family	Cobalt-zinc-cadmium resistance		PEG1298	531	9795	13524	10196		9795	10969.1	7815.81	10382	1955.18	0.163346	8805.35	1658.26	-0.325636		K
PEG1299	fig|6666666.88372.peg.1299	peg.1299	CDS	LMR001-004	524292	524068	225	miscellaneous; unknown	- none -		PEG1299	225	1492	2208	2091		1492	1932.26	1126.5	1712.53	761.124	0.372275	1309.65	582.066	-0.406165
PEG1300	fig|6666666.88372.peg.1300	peg.1300	CDS	LMR001-004	525185	524925	261	FIG01076224: hypothetical protein	- none -		PEG1300	260	110	205	361		110	161.686	133.122	135.793	52.2282	0.556998	121.512	46.7352	0.276555
PEG1301	fig|6666666.88372.peg.1301	peg.1301	CDS	LMR001-004	525372	525578	207	UPF0337 protein msl9551	- none -		PEG1301	207	750	1814	1266		750	1566.59	528.719	1158.24	559.536	1.06286	639.307	308.844	-0.504186		S
PEG1302	fig|6666666.88372.peg.1302	peg.1302	CDS	LMR001-004	525975	525799	177	hypothetical protein	- none -		PEG1302	177	57	212	196		57	167.905	67.6217	112.461	63.5372	1.5582	62.3191	35.2085	0.24611
PEG1303	fig|6666666.88372.peg.1303	peg.1303	CDS	LMR001-004	526758	526465	294	hypothetical protein	- none -		PEG1303	294	896	1832	1830		896	1579.99	962.306	1237.68	420.979	0.819369	928.835	315.93	0.10402
PEG1304	fig|6666666.88372.peg.1304	peg.1304	CDS	LMR001-004	528566	527394	1173	putative glycosyltransferase protein	CBSS-258594.1.peg.3339		PEG1304	1171	718	810	1979		718	676.298	1058.23	697.046	59.5257	-0.0859123	888.01	75.8335	0.560006		M
PEG1305	fig|6666666.88372.peg.1305	peg.1305	CDS	LMR001-004	529813	528563	1251	Molybdopterin biosynthesis protein MoeA	Molybdenum cofactor biosynthesis		PEG1305	1250	641	676	1998		641	557.172	1072.32	599.191	47.9353	-0.202672	856.767	68.5413	0.741873		M
PEG1306	fig|6666666.88372.peg.1306	peg.1306	CDS	LMR001-004	531372	529810	1563	Probable glycosyl transferase	- none -		PEG1306	1563	6629	4506	8716		6629	3846.32	6502.74	5234.24	334.884	-0.783824	6562.45	419.863	-0.0262542		M
PEG1307	fig|6666666.88372.peg.1307	peg.1307	CDS	LMR001-004	532606	531434	1173	Glycosyltransferase	CBSS-258594.1.peg.3339		PEG1307	1173	5413	3473	7092		5413	3067.65	5116.83	4237.59	361.261	-0.817842	5262.19	448.609	-0.0797232		M
PEG1308	fig|6666666.88372.peg.1308	peg.1308	CDS	LMR001-004	533148	532612	537	Polysaccharide export protein	- none -		PEG1308	537	3675	2323	4394		3675	2028.31	2940.22	2850.56	530.831	-0.856614	3306.52	615.74	-0.320965		M	K01991
PEG1309	fig|6666666.88372.peg.1309	peg.1309	CDS	LMR001-004	533382	535520	2139	putative transmembrane succinoglycan biosynthesis transport protein	- none -		PEG1309	2139	7231	3599	9907		7231	3159.45	7571.32	5193.57	242.804	-1.19386	7399.51	345.933	0.0670086		MD
PEG1310	fig|6666666.88372.peg.1310	peg.1310	CDS	LMR001-004	536783	535539	1245	FIG01074646: hypothetical protein	- none -		PEG1310	1245	948	1498	2307		948	1298.94	1298.62	1123.68	90.2552	0.453736	1123.52	90.2425	0.453383		M
PEG1311	fig|6666666.88372.peg.1311	peg.1311	CDS	LMR001-004	537045	537695	651	Chloramphenicol acetyltransferase (EC 2.3.1.28)	- none -		PEG1311	641	219	561	791		219	463.801	292.278	341.288	53.2431	1.08405	255.527	39.8638	0.417886		R	K18234
PEG1312	fig|6666666.88372.peg.1312	peg.1312	CDS	LMR001-004	537992	537699	294	FIG01076144: hypothetical protein	- none -		PEG1312	294	187	351	396		187	294.281	146.292	240.675	81.8621	0.65363	166.68	56.6939	-0.354716
PEG1313	fig|6666666.88372.peg.1313	peg.1313	CDS	LMR001-004	538668	538456	213	FIG00984276: hypothetical protein	- none -		PEG1313	213	375	581	753		375	479.425	281.415	427.199	200.563	0.354517	328.194	154.082	-0.414086
PEG1314	fig|6666666.88372.peg.1314	peg.1314	CDS	LMR001-004	538894	539997	1104	Heme A synthase, cytochrome oxidase biogenesis protein Cox15-CtaA	Biogenesis of cytochrome c oxidases		PEG1314	1104	4471	6427	7586		4471	5545.32	5512.39	5006.08	453.449	0.312016	4989.61	451.958	0.303424		O	K02259
PEG1315	fig|6666666.88372.peg.1315	peg.1315	CDS	LMR001-004	541120	540065	1056	N-acetyl-gamma-glutamyl-phosphate reductase (EC 1.2.1.38)	Arginine Biosynthesis -- gjo, Arginine Biosynthesis extended		PEG1315	1054	6586	7676	8987		6586	6509.62	6764.61	6550.68	621.507	-0.0180858	6678.17	633.603	0.0373469		E	K00145
PEG1316	fig|6666666.88372.peg.1316	peg.1316	CDS	LMR001-004	542045	541089	957	Agmatinase (EC 3.5.3.11)	Arginine and Ornithine Degradation, Polyamine Metabolism		PEG1316	957	2022	2123	3104		2022	1854.96	1916.8	1938.99	202.611	-0.12512	1969.91	205.842	-0.0778125		E	K01480
PEG1317	fig|6666666.88372.peg.1317	peg.1317	CDS	LMR001-004	542668	542201	468	SSU ribosomal protein S9p (S16e)	Ribosome SSU bacterial		PEG1317	468	12163	42536	20976		12163	28942.3	16708.7	20552.1	4391.47	1.25082	14435.3	3084.46	0.458238		J	K02996
PEG1318	fig|6666666.88372.peg.1318	peg.1318	CDS	LMR001-004	543135	542671	465	LSU ribosomal protein L13p (L13Ae)	Ribosome LSU bacterial		PEG1318	465	17469	65231	30463		17469	41017.9	25095.5	29238	6287.75	1.23235	21276.8	4575.66	0.523519		J	K02871
PEG1319	fig|6666666.88372.peg.1319	peg.1319	CDS	LMR001-004	543766	543353	414	Phenylacetic acid degradation-related protein	- none -		PEG1319	414	271	363	876		271	307.245	324.914	289.132	69.8387	0.180995	297.967	71.9726	0.261663		Q
PEG1320	fig|6666666.88372.peg.1320	peg.1320	CDS	LMR001-004	543933	544754	822	Enoyl-CoA hydratase (EC 4.2.1.17)	Acetyl-CoA fermentation to Butyrate, Butanol Biosynthesis, Butyrate metabolism cluster, Fatty acid metabolism cluster, Isoleucine degradation, Polyhydroxybutyrate metabolism, Valine degradation		PEG1320	822	2477	3662	3512		2477	3209.66	2224.74	2843.54	345.93	0.373581	2351.08	286.019	-0.155204		I
PEG1321	fig|6666666.88372.peg.1321	peg.1321	CDS	LMR001-004	545668	544757	912	Integral membrane protein	- none -		PEG1321	905	704	1004	1633		704	886.769	794.953	795.731	87.9261	0.331563	749.823	82.8534	0.173874
PEG1322	fig|6666666.88372.peg.1322	peg.1322	CDS	LMR001-004	545789	546226	438	O-acetylhomoserine sulfhydrylase (EC 2.5.1.49) / O-succinylhomoserine sulfhydrylase (EC 2.5.1.48)	Methionine Biosynthesis, Methionine Biosynthesis		PEG1322	438	3520	2270	3826		3520	1984.11	2468.37	2753.91	628.746	-0.828603	2996.04	684.027	-0.513538		R	K06929
PEG1323	fig|6666666.88372.peg.1323	peg.1323	CDS	LMR001-004	546253	547533	1281	O-acetylhomoserine sulfhydrylase (EC 2.5.1.49) / O-succinylhomoserine sulfhydrylase (EC 2.5.1.48)	Methionine Biosynthesis, Methionine Biosynthesis		PEG1323	1281	5535	3259	7235		5535	2900.48	5222.62	4216.99	329.195	-0.931902	5378.06	419.833	-0.0834201		E	K01740
PEG1324	fig|6666666.88372.peg.1324	peg.1324	CDS	LMR001-004	547582	547917	336	Nucleoside-diphosphate-sugar epimerases	CBSS-296591.1.peg.2330		PEG1324	336	1052	717	1148		1052	595.815	455.114	823.889	245.205	-0.820146	753.538	224.267	-1.20878		R	K06995
PEG1325	fig|6666666.88372.peg.1325	peg.1325	CDS	LMR001-004	549225	547933	1293	putative cytochrome P450 hydroxylase	- none -		PEG1325	1298	1410	1247	2646		1410	1118.92	1528.99	1264.11	97.3887	-0.332857	1469.14	113.185	0.117615		Q	K00493
PEG1326	fig|6666666.88372.peg.1326	peg.1326	CDS	LMR001-004	549362	550219	858	dioxygenase (EC 1.13.11.-)	- none -		PEG1326	858	2311	1559	3457		2311	1352.04	2184.9	1832.05	213.526	-0.774047	2248.48	262.061	-0.0816131		R
PEG1327	fig|6666666.88372.peg.1327	peg.1327	CDS	LMR001-004	550238	551797	1560	Cardiolipin synthetase (EC 2.7.8.-)	Cardiolipin synthesis, Glycerolipid and Glycerophospholipid Metabolism in Bacteria		PEG1327	1560	863	875	2158		863	733.925	1175.33	798.452	51.1828	-0.233692	1019.15	65.3304	0.44567		I
PEG1328	fig|6666666.88372.peg.1328	peg.1328	CDS	LMR001-004	552195	552827	633	ATP-dependent Clp protease proteolytic subunit (EC 3.4.21.92)	Proteasome bacterial, Proteolysis in bacteria, ATP-dependent, cAMP signaling in bacteria		PEG1328	633	24098	23674	26365		24098	17733.7	21468.2	20916.4	3304.32	-0.442485	22783.6	3599.31	-0.166773		OU	K01358
PEG1329	fig|6666666.88372.peg.1329	peg.1329	CDS	LMR001-004	553114	554397	1284	ATP-dependent Clp protease ATP-binding subunit ClpX	Proteasome bacterial, Proteolysis in bacteria, ATP-dependent		PEG1329	1284	51728	56985	60503		51728	36804.4	52483.8	44282.6	3448.8	-0.491977	52122.2	4059.36	0.0200157		O	K03544
PEG1330	fig|6666666.88372.peg.1330	peg.1330	CDS	LMR001-004	554809	557226	2418	ATP-dependent protease La (EC 3.4.21.53) Type I	Proteasome bacterial, Proteolysis in bacteria, ATP-dependent		PEG1330	2418	110236	105491	113144		110236	60808.5	101846	85481.2	3535.2	-0.857175	106000	4383.79	-0.11313		O	K01338
PEG1331	fig|6666666.88372.peg.1331	peg.1331	CDS	LMR001-004	557342	557223	120	hypothetical protein	- none -		PEG1331	120	200	224	234		200	178.997	83.3355	189.492	157.91	-0.159961	141.661	118.051	-1.2629
PEG1332	fig|6666666.88372.peg.1332	peg.1332	CDS	LMR001-004	557448	557720	273	DNA-binding protein HU-beta	DNA structural proteins, bacterial		PEG1332	273	51810	64693	56822		51810	40788.2	49121.5	46274.5	16950.3	-0.343704	50441.1	18476.6	-0.0755008		L	K03530
PEG1333	fig|6666666.88372.peg.1333	peg.1333	CDS	LMR001-004	558021	560216	2196	Alkaline phosphatase (EC 3.1.3.1)	Phosphate metabolism		PEG1333	2193	549	1408	2628		549	1229.14	1515.41	889.342	40.5537	1.16135	1032.47	47.0804	1.46341
PEG1334	fig|6666666.88372.peg.1334	peg.1334	CDS	LMR001-004	560803	560300	504	Transcriptional regulator, MarR family	- none -		PEG1334	504	1210	2249	2373		1210	1966.3	1344.32	1588.45	315.168	0.699763	1277.46	253.464	0.15116		K
PEG1335	fig|6666666.88372.peg.1335	peg.1335	CDS	LMR001-004	562898	561024	1875	Methyl-accepting chemotaxis protein I (serine chemoreceptor protein)	Bacterial Chemotaxis		PEG1335	1875	4482	785	2443		4482	657.083	1389.83	2567.11	136.912	-2.76843	2933.48	156.452	-1.68767		NT	K03406
PEG1336	fig|6666666.88372.peg.1336	peg.1336	CDS	LMR001-004	563183	564457	1275	DNA repair exonuclease family protein YhaO	DNA repair, bacterial		PEG1336	1266	2649	3817	4258		2649	3327.28	2818.9	2987.89	236.01	0.329167	2733.7	215.932	0.0899568		L
PEG1337	fig|6666666.88372.peg.1337	peg.1337	CDS	LMR001-004	564457	567918	3462	Chromosome partition protein smc	DNA structural proteins, bacterial		PEG1337	3462	4186	5877	7327		4186	5055.61	5303.45	4621.77	133.5	0.271646	4745.69	137.079	0.340691		S
PEG1338	fig|6666666.88372.peg.1338	peg.1338	CDS	LMR001-004	568001	568399	399	Transcriptional regulator	- none -		PEG1338	399	1093	1511	1595		1093	1308.26	761.93	1201.11	301.03	0.258093	927.943	232.567	-0.521826		S
PEG1339	fig|6666666.88372.peg.1339	peg.1339	CDS	LMR001-004	568762	568926	165	hypothetical protein	- none -		PEG1339	164	53	55	118		53	38.8302	34.7574	45.8983	27.9868	-0.447895	43.8619	26.745	-0.607755
PEG1340	fig|6666666.88372.peg.1340	peg.1340	CDS	LMR001-004	569355	569209	147	hypothetical protein	- none -		PEG1340	145	154	306	269		154	247.344	97.8214	200.757	138.453	0.681994	125.996	86.8936	-0.6563
PEG1341	fig|6666666.88372.peg.1341	peg.1341	CDS	LMR001-004	569528	569893	366	NADH ubiquinone oxidoreductase chain A (EC 1.6.5.3)	NADH ubiquinone oxidoreductase, Respiratory Complex I		PEG1341	366	6830	8496	8912		6830	7168.7	6689.95	6996.04	1911.49	0.0712229	6756.67	1846.08	-0.0284916		C	K00330
PEG1342	fig|6666666.88372.peg.1342	peg.1342	CDS	LMR001-004	569884	570462	579	NADH-ubiquinone oxidoreductase chain B (EC 1.6.5.3)	NADH ubiquinone oxidoreductase, Respiratory Complex I		PEG1342	579	9795	12876	12036		9795	10535.7	9332.78	10165.3	1755.66	0.105179	9563.84	1651.79	-0.0697244		C	K00331
PEG1343	fig|6666666.88372.peg.1343	peg.1343	CDS	LMR001-004	570481	571086	606	NADH-ubiquinone oxidoreductase chain C (EC 1.6.5.3)	NADH ubiquinone oxidoreductase, Respiratory Complex I		PEG1343	606	8580	9748	10317		8580	8244.17	7940.51	8407.28	1387.34	-0.055984	8255.44	1362.28	-0.110127		C	K00332
PEG1344	fig|6666666.88372.peg.1344	peg.1344	CDS	LMR001-004	571144	572334	1191	NADH-ubiquinone oxidoreductase chain D (EC 1.6.5.3)	NADH ubiquinone oxidoreductase, Respiratory Complex I		PEG1344	1191	16727	18249	18458		16727	14216.7	14564.2	15463.8	1298.39	-0.233207	15637.5	1312.98	-0.198366		C	K00333
PEG1345	fig|6666666.88372.peg.1345	peg.1345	CDS	LMR001-004	572334	572588	255	HYPOTHETICAL SIGNAL PEPTIDE PROTEIN	- none -		PEG1345	255	1683	1591	1947		1683	1381.76	1038.91	1532.22	600.869	-0.28425	1360.79	533.643	-0.695692
PEG1346	fig|6666666.88372.peg.1346	peg.1346	CDS	LMR001-004	572605	573444	840	NADH-ubiquinone oxidoreductase chain E (EC 1.6.5.3)	NADH ubiquinone oxidoreductase, Respiratory Complex I		PEG1346	840	11449	13198	14764		11449	10760.8	11501.1	11108	1322.38	-0.0902105	11478.1	1366.44	0.00577608		C	K00334
PEG1347	fig|6666666.88372.peg.1347	peg.1347	CDS	LMR001-004	573449	574753	1305	NADH-ubiquinone oxidoreductase chain F (EC 1.6.5.3)	NADH ubiquinone oxidoreductase, Respiratory Complex I		PEG1347	1305	16936	17899	19096		16936	13993.2	15106.6	15468.3	1185.31	-0.275998	16025	1227.97	-0.165542		C	K00335
PEG1348	fig|6666666.88372.peg.1348	peg.1348	CDS	LMR001-004	574760	575386	627	NADH-ubiquinone oxidoreductase chain E (EC 1.6.5.3)	NADH ubiquinone oxidoreductase, Respiratory Complex I		PEG1348	627	3873	4411	5300		3873	3770.71	3665.21	3821.64	609.512	-0.0384578	3768.89	601.099	-0.0793975		S	K00334
PEG1349	fig|6666666.88372.peg.1349	peg.1349	CDS	LMR001-004	575486	577567	2082	NADH-ubiquinone oxidoreductase chain G (EC 1.6.5.3)	NADH ubiquinone oxidoreductase, Respiratory Complex I		PEG1349	2082	28222	28784	31390		28222	20856.8	25921.9	24552.8	1179.29	-0.437669	27085.4	1300.93	-0.124016		C	K00336
PEG1350	fig|6666666.88372.peg.1350	peg.1350	CDS	LMR001-004	577588	578631	1044	NADH-ubiquinone oxidoreductase chain H (EC 1.6.5.3)	NADH ubiquinone oxidoreductase, Respiratory Complex I		PEG1350	1044	13983	18751	19945		13983	14554.4	15825.3	14275.1	1367.35	0.0564522	14910.6	1428.22	0.177235		C	K00337
PEG1351	fig|6666666.88372.peg.1351	peg.1351	CDS	LMR001-004	578696	579187	492	NADH-ubiquinone oxidoreductase chain I (EC 1.6.5.3)	NADH ubiquinone oxidoreductase, Respiratory Complex I		PEG1351	492	4407	5362	6002		4407	4565.92	4233.27	4485.74	911.735	0.0515854	4319.41	877.928	-0.0575509		C	K00338
PEG1352	fig|6666666.88372.peg.1352	peg.1352	CDS	LMR001-004	579308	579952	645	NADH-ubiquinone oxidoreductase chain J (EC 1.6.5.3)	NADH ubiquinone oxidoreductase, Respiratory Complex I		PEG1352	645	7329	7185	9572		7329	6134.91	7273.74	6731.58	1043.66	-0.256425	7300.99	1131.94	-0.0107697		C	K00339
PEG1353	fig|6666666.88372.peg.1353	peg.1353	CDS	LMR001-004	579982	580290	309	NADH-ubiquinone oxidoreductase chain K (EC 1.6.5.3)	NADH ubiquinone oxidoreductase, Respiratory Complex I		PEG1353	309	4596	4743	6014		4596	4042.43	4243.91	4317.2	1397.15	-0.183895	4417.94	1429.76	-0.113723		C	K00340
PEG1354	fig|6666666.88372.peg.1354	peg.1354	CDS	LMR001-004	580298	582292	1995	NADH-ubiquinone oxidoreductase chain L (EC 1.6.5.3)	NADH ubiquinone oxidoreductase, Respiratory Complex I		PEG1354	1995	20207	21014	24793		20207	16060.8	20061.3	18145.5	909.549	-0.332964	20145.8	1009.81	-0.0120929		CP	K00341
PEG1355	fig|6666666.88372.peg.1355	peg.1355	CDS	LMR001-004	582292	583803	1512	NADH-ubiquinone oxidoreductase chain M (EC 1.6.5.3)	NADH ubiquinone oxidoreductase, Respiratory Complex I		PEG1355	1512	19320	20156	23427		19320	15467.1	18871	17393.4	1150.36	-0.320869	19095.3	1262.92	-0.0339013		C	K00342
PEG1356	fig|6666666.88372.peg.1356	peg.1356	CDS	LMR001-004	583823	585265	1443	NADH-ubiquinone oxidoreductase chain N (EC 1.6.5.3)	NADH ubiquinone oxidoreductase, Respiratory Complex I		PEG1356	1443	21831	21248	23982		21831	16189.1	19359.1	19008.2	1317.27	-0.431111	20593.2	1427.11	-0.173122		C	K00343
PEG1357	fig|6666666.88372.peg.1357	peg.1357	CDS	LMR001-004	585262	586041	780	Biotin--protein ligase (EC 6.3.4.9, EC 6.3.4.10, EC 6.3.4.11, EC 6.3.4.15)	- none -		PEG1357	780	3039	3945	3636		3039	3423.5	2316.95	3232.19	414.384	0.170981	2678.92	343.451	-0.392262		H	K03524
PEG1358	fig|6666666.88372.peg.1358	peg.1358	CDS	LMR001-004	586056	587723	1668	Metallo-beta-lactamase family protein, RNA-specific	Bacterial RNA-metabolizing Zn-dependent hydrolases, Ribonucleases in Bacillus		PEG1358	1668	11971	14366	14393		11971	11531.3	11206.5	11749.4	704.399	-0.0535494	11587	694.662	-0.0947741		R	K12574
PEG1359	fig|6666666.88372.peg.1359	peg.1359	CDS	LMR001-004	587875	588279	405	Methylmalonyl-CoA epimerase (EC 5.1.99.1); Ethylmalonyl-CoA epimerase	Propionyl-CoA to Succinyl-CoA Module		PEG1359	405	1141	1153	1990		1141	1053.85	1066.67	1097.05	270.877	-0.113679	1103.46	272.46	-0.0962319		E	K05606
PEG1360	fig|6666666.88372.peg.1360	peg.1360	CDS	LMR001-004	588462	588731	270	hypothetical protein	- none -		PEG1360	270	406	545	851		406	451.633	313.965	429.038	158.903	0.152096	360.204	133.409	-0.372449		S
PEG1361	fig|6666666.88372.peg.1361	peg.1361	CDS	LMR001-004	589410	590915	1506	Prolyl-tRNA synthetase (EC 6.1.1.15), bacterial type	tRNA aminoacylation, Pro		PEG1361	1503	15384	21022	21285		15384	16060.8	16961.4	15721.2	1045.99	0.0623458	16171.5	1075.95	0.141054		J	K01881
PEG1362	fig|6666666.88372.peg.1362	peg.1362	CDS	LMR001-004	590933	592243	1311	Lipoprotein releasing system transmembrane protein LolC	Lipoprotein sorting system		PEG1362	1311	10493	12772	13872		10493	10452.5	10791.5	10473.9	798.928	-0.00591839	10643.5	811.859	0.0401359		M	K09808
PEG1363	fig|6666666.88372.peg.1363	peg.1363	CDS	LMR001-004	592261	592947	687	Lipoprotein releasing system ATP-binding protein LolD	Lipoprotein sorting system		PEG1363	687	2376	2652	3657		2376	2305.66	2330.06	2341.25	340.794	-0.0438632	2353.45	342.569	-0.0286783		V	K09810
PEG1364	fig|6666666.88372.peg.1364	peg.1364	CDS	LMR001-004	593491	593024	468	FIG00983817: hypothetical protein	- none -		PEG1364	468	1169	1301	1566		1169	1151.65	737.686	1160.57	247.986	-0.0221932	953.592	203.759	-0.664813
PEG1365	fig|6666666.88372.peg.1365	peg.1365	CDS	LMR001-004	594145	593576	570	hypothetical protein	- none -		PEG1365	570	915	697	1338		915	575.863	576.713	744.988	130.7	-0.666648	745.413	130.774	-0.664519
PEG1366	fig|6666666.88372.peg.1366	peg.1366	CDS	LMR001-004	594393	594548	156	hypothetical protein	- none -		PEG1366	156	413	719	648		413	597.392	248.146	505.22	323.859	0.53237	330.597	211.921	-0.735119
PEG1367	fig|6666666.88372.peg.1367	peg.1367	CDS	LMR001-004	594668	598165	3498	DNA polymerase III alpha subunit (EC 2.7.7.7)	Inteins		PEG1367	3498	23492	23197	27657		23492	17432.3	22614.5	20464.3	585.029	-0.430671	23055.4	659.102	-0.055189		L	K02337
PEG1368	fig|6666666.88372.peg.1368	peg.1368	CDS	LMR001-004	599454	598225	1230	FIG00985096: hypothetical protein	- none -		PEG1368	1230	2625	3311	4842		2625	2942.47	3310.96	2783.35	226.288	0.165141	2967.59	241.267	0.33536		SM
PEG1369	fig|6666666.88372.peg.1369	peg.1369	CDS	LMR001-004	601020	599728	1293	DNA polymerase IV (EC 2.7.7.7)	DNA repair, bacterial		PEG1369	1243	1175	1259	2126		1175	1125.65	1152.92	1150.27	92.54	-0.0617807	1163.91	93.637	-0.0272444		L	K02346
PEG1370	fig|6666666.88372.peg.1370	peg.1370	CDS	LMR001-004	600880	601038	159	hypothetical protein	- none -		PEG1370	152	8	17	48		8	12.5347	11.2645	10.2665	6.75429	0.648156	9.63143	6.33647	0.494013
PEG1371	fig|6666666.88372.peg.1371	peg.1371	CDS	LMR001-004	601096	601683	588	Histone acetyltransferase HPA2 and related acetyltransferases	CBSS-216591.1.peg.168		PEG1371	588	1118	1379	1776		1118	1208.75	921.824	1162.8	197.756	0.114058	1019.34	173.358	-0.27689		R
PEG1372	fig|6666666.88372.peg.1372	peg.1372	CDS	LMR001-004	602027	601761	267	hypothetical protein	- none -		PEG1372	267	667	874	916		667	733.925	343.947	700.366	262.309	0.138364	505.377	189.28	-0.955084
PEG1373	fig|6666666.88372.peg.1373	peg.1373	CDS	LMR001-004	602184	602555	372	TWO COMPONENT RESPONSE REGULATOR	- none -		PEG1373	372	3421	3301	5173		3421	2936.42	3565.31	3178.11	854.33	-0.219849	3492.55	938.858	0.0601184		T	K11443
PEG1374	fig|6666666.88372.peg.1374	peg.1374	CDS	LMR001-004	602573	603940	1368	Pole remodelling regulatory diguanylate cyclase	- none -		PEG1374	1368	5171	4568	7700		5171	3898.28	5600.1	4537.18	331.665	-0.409018	5388.09	393.866	0.113597		T	K02488
PEG1375	fig|6666666.88372.peg.1375	peg.1375	CDS	LMR001-004	604616	604449	168	LSU ribosomal protein L33p @ LSU ribosomal protein L33p, zinc-independent	Ribosome LSU bacterial, Ribosome LSU bacterial		PEG1375	168	10527	24819	27691		10527	18444.9	22614.5	14482.3	8620.41	0.810143	16567	9861.34	1.10416		J	K02913
PEG1376	fig|6666666.88372.peg.1376	peg.1376	CDS	LMR001-004	605896	604712	1185	Transporter, MFS superfamily	- none -		PEG1376	1183	1099	2343	2650		1099	2045.9	1528.99	1572.45	132.921	0.896539	1314	111.074	0.476383		G
PEG1377	fig|6666666.88372.peg.1377	peg.1377	CDS	LMR001-004	606500	605910	591	MutT/nudix family protein	- none -		PEG1377	591	631	1485	1534		631	1288.01	712.404	959.482	162.349	1.02953	671.681	113.652	0.175154
PEG1378	fig|6666666.88372.peg.1378	peg.1378	CDS	LMR001-004	607108	606620	489	ZINC-FINGER PROTEIN	- none -		PEG1378	489	1607	2833	3148		1607	2465.45	1954.24	2036.2	416.4	0.617537	1780.59	364.129	0.282291		S
PEG1379	fig|6666666.88372.peg.1379	peg.1379	CDS	LMR001-004	609485	607116	2370	3'-to-5' exoribonuclease RNase R	RNA processing and degradation, bacterial		PEG1379	2370	6863	13280	13429		6863	10804.8	10441.8	8837.72	372.9	0.65314	8656.25	365.243	0.603846		K	K12573
PEG1380	fig|6666666.88372.peg.1380	peg.1380	CDS	LMR001-004	612160	609488	2673	DNA topoisomerase I (EC 5.99.1.2)	CBSS-272943.3.peg.1367, Conserved gene cluster associated with Met-tRNA formyltransferase, DNA topoisomerases, Type I, ATP-independent, Inteins, pVir Plasmid of Campylobacter		PEG1380	2673	13407	26511	22396		13407	19447	17932.8	16421.9	614.362	0.537666	15664.8	586.038	0.420718		LR	K03168
PEG1381	fig|6666666.88372.peg.1381	peg.1381	CDS	LMR001-004	613534	612371	1164	Rossmann fold nucleotide-binding protein Smf possibly involved in DNA uptake	CBSS-272943.3.peg.1367, Conserved gene cluster associated with Met-tRNA formyltransferase		PEG1381	1164	2058	2148	3701		2058	1878.79	2363.58	1967.34	169.015	-0.129963	2209.73	189.84	0.201208		LU	K04096
PEG1382	fig|6666666.88372.peg.1382	peg.1382	CDS	LMR001-004	614139	613534	606	Acyl-phosphate:glycerol-3-phosphate O-acyltransferase PlsY	Glycerolipid and Glycerophospholipid Metabolism in Bacteria		PEG1382	606	1995	2212	3564		1995	1936.55	2260.29	1965.9	324.407	-0.0430915	2127.77	351.118	0.179926		S	K08591
PEG1383	fig|6666666.88372.peg.1383	peg.1383	CDS	LMR001-004	615470	614178	1293	Dihydroorotase (EC 3.5.2.3)	De Novo Pyrimidine Synthesis, Zinc regulated enzymes		PEG1383	1293	3192	4792	5533		3192	4087.92	3864.08	3639.73	281.495	0.357114	3527.81	272.839	0.275871		F	K01465
PEG1384	fig|6666666.88372.peg.1384	peg.1384	CDS	LMR001-004	616408	615467	942	Aspartate carbamoyltransferase (EC 2.1.3.2)	De Novo Pyrimidine Synthesis		PEG1384	942	2487	3926	4474		2487	3409.6	3011.22	2949.23	313.081	0.454118	2750.04	291.936	0.274867		F	K00609
PEG1385	fig|6666666.88372.peg.1385	peg.1385	CDS	LMR001-004	616566	618218	1653	Acyl-CoA dehydrogenase (EC 1.3.8.7)	- none -		PEG1385	1649	9469	11516	11677		9469	9596.53	9051.89	9529.45	577.893	0.0203113	9257.13	561.378	-0.0639827		I	K09456
PEG1386	fig|6666666.88372.peg.1386	peg.1386	CDS	LMR001-004	619135	618200	936	Transporter	- none -		PEG1386	936	983	1441	1801		983	1252.52	943.776	1118.27	119.473	0.348089	963.893	102.98	-0.0602305		R	K07088
PEG1387	fig|6666666.88372.peg.1387	peg.1387	CDS	LMR001-004	619316	619459	144	hypothetical protein	- none -		PEG1387	144	867	263	1014		867	211.559	392.17	539.26	374.486	-2.03491	629.566	437.198	-1.14449
PEG1388	fig|6666666.88372.peg.1388	peg.1388	CDS	LMR001-004	620225	619737	489	Putative Holliday junction resolvase YggF	Cluster containing Alanyl-tRNA synthetase, Cluster containing Glutathione synthetase		PEG1388	488	1406	1375	1978		1406	1204.31	1058.23	1305.18	267.455	-0.223435	1232.14	252.487	-0.409997		L	K07447
PEG1389	fig|6666666.88372.peg.1389	peg.1389	CDS	LMR001-004	620346	621050	705	metallo-beta-lactamase family protein	- none -		PEG1389	705	3927	5276	6063		3927	4489.3	4286.2	4207.88	596.862	0.193266	4106.32	582.457	0.126474		R
PEG1390	fig|6666666.88372.peg.1390	peg.1390	CDS	LMR001-004	621157	621444	288	Aspartyl-tRNA(Asn) amidotransferase subunit C (EC 6.3.5.6) @ Glutamyl-tRNA(Gln) amidotransferase subunit C (EC 6.3.5.7)	tRNA aminoacylation, Asp and Asn, tRNA aminoacylation, Glu and Gln		PEG1390	288	3212	5221	4659		3212	4445.9	3162.93	3829.78	1329.78	0.468257	3188.3	1107.05	-0.022955		J	K02435
PEG1391	fig|6666666.88372.peg.1391	peg.1391	CDS	LMR001-004	621497	622978	1482	Aspartyl-tRNA(Asn) amidotransferase subunit A (EC 6.3.5.6) @ Glutamyl-tRNA(Gln) amidotransferase subunit A (EC 6.3.5.7)	tRNA aminoacylation, Asp and Asn, tRNA aminoacylation, Glu and Gln		PEG1391	1482	13084	21795	18478		13084	16542.3	14599.7	14817	999.8	0.33749	13845.7	934.261	0.157271		J	K02433
PEG1392	fig|6666666.88372.peg.1392	peg.1392	CDS	LMR001-004	623214	623101	114	hypothetical protein	- none -		PEG1392	114	178	533	328		178	443.792	120.859	310.81	272.64	1.3194	149.344	131.003	-0.557153
PEG1393	fig|6666666.88372.peg.1393	peg.1393	CDS	LMR001-004	623167	623562	396	N-acetylglutamate synthase (EC 2.3.1.1)	Arginine Biosynthesis -- gjo, Arginine Biosynthesis extended		PEG1393	396	436	1001	876		436	880.955	324.914	658.234	166.221	1.01636	380.213	96.0134	-0.422654		M
PEG1394	fig|6666666.88372.peg.1394	peg.1394	CDS	LMR001-004	623908	623654	255	FIG00985406: hypothetical protein	- none -		PEG1394	255	411	591	663		411	488.437	253.949	449.794	176.39	0.24851	332.549	130.411	-0.695127		S	K09982
PEG1395	fig|6666666.88372.peg.1395	peg.1395	CDS	LMR001-004	624200	625750	1551	Aspartyl-tRNA(Asn) amidotransferase subunit B (EC 6.3.5.6) @ Glutamyl-tRNA(Gln) amidotransferase subunit B (EC 6.3.5.7)	tRNA aminoacylation, Asp and Asn, tRNA aminoacylation, Glu and Gln		PEG1395	1542	10890	17596	14470		10890	13771.4	11259.6	12330.4	799.635	0.338767	11074.5	718.189	0.0482493		J	K02434
PEG1396	fig|6666666.88372.peg.1396	peg.1396	CDS	LMR001-004	625753	626250	498	Protein export cytoplasm protein SecA ATPase RNA helicase (TC 3.A.5.1.1)	- none -		PEG1396	498	2175	3313	3142		2175	2942.47	1948.35	2557.59	513.572	0.437539	2060.53	413.76	-0.157235		R
PEG1397	fig|6666666.88372.peg.1397	peg.1397	CDS	LMR001-004	626300	626800	501	Regulatory protein for C-P lyase	- none -		PEG1397	500	348	479	754		348	402.866	281.415	375.601	75.1203	0.209813	314.876	62.9753	-0.307784		R
PEG1398	fig|6666666.88372.peg.1398	peg.1398	CDS	LMR001-004	626898	627296	399	NADH:ubiquinone oxidoreductase 17.2 kD subunit	Biotin carboxylase and ubiquinone oxidoreductase subunit cluster, Respiratory Complex I		PEG1398	399	2618	4135	4748		2618	3561.21	3241.79	3089.7	774.36	0.443802	2929.99	734.333	0.308226		C	K00356
PEG1399	fig|6666666.88372.peg.1399	peg.1399	CDS	LMR001-004	627468	627884	417	FIG167255: hypothetical protein	Biotin carboxylase and ubiquinone oxidoreductase subunit cluster		PEG1399	417	3513	6789	4966		3513	5840.51	3403.85	4678.06	1121.84	0.732321	3459.73	829.671	-0.0466036		S
PEG1400	fig|6666666.88372.peg.1400	peg.1400	CDS	LMR001-004	628519	627947	573	Leucyl/phenylalanyl-tRNA--protein transferase (EC 2.3.2.6)	Biotin carboxylase and ubiquinone oxidoreductase subunit cluster, Protein degradation		PEG1400	573	1723	2517	2504		1723	2192.55	1429.64	1957.21	341.573	0.348636	1575.76	275.001	-0.268321		O	K00684
PEG1401	fig|6666666.88372.peg.1401	peg.1401	CDS	LMR001-004	629914	628571	1344	Biotin carboxylase of acetyl-CoA carboxylase (EC 6.3.4.14)	Biotin carboxylase and ubiquinone oxidoreductase subunit cluster, Fatty Acid Biosynthesis FASII		PEG1401	1344	16498	28431	22357		16498	20654.8	17887.1	18568.2	1381.56	0.325616	17184.4	1278.6	0.118061		I	K01961
PEG1402	fig|6666666.88372.peg.1402	peg.1402	CDS	LMR001-004	630400	629927	474	Biotin carboxyl carrier protein of acetyl-CoA carboxylase	Biotin carboxylase and ubiquinone oxidoreductase subunit cluster, Fatty Acid Biosynthesis FASII		PEG1402	474	5237	10708	9036		5237	9019.34	6802.19	7127.67	1503.73	0.784555	6019.1	1269.85	0.377532		I	K02160
PEG1403	fig|6666666.88372.peg.1403	peg.1403	CDS	LMR001-004	630870	630424	447	3-dehydroquinate dehydratase II (EC 4.2.1.10)	Biotin carboxylase and ubiquinone oxidoreductase subunit cluster, Chorismate Synthesis, Common Pathway For Synthesis of Aromatic Compounds (DAHP synthase to chorismate), Quinate degradation		PEG1403	447	7612	13330	10481		7612	10844.9	8066.09	9224.11	2063.56	0.512333	7834.68	1752.72	0.085251		E	K03786
PEG1404	fig|6666666.88372.peg.1404	peg.1404	CDS	LMR001-004	631794	631027	768	Protein-disulfide isomerase	- none -		PEG1404	768	5817	8297	8423		5817	7008.06	6228.96	6414.55	835.228	0.267741	6024.99	784.504	0.0977155		O
PEG1405	fig|6666666.88372.peg.1405	peg.1405	CDS	LMR001-004	632073	633185	1113	Valine--pyruvate aminotransferase (EC 2.6.1.66)	Alanine biosynthesis, Branched-Chain Amino Acid Biosynthesis, Pyruvate Alanine Serine Interconversions		PEG1405	1113	1908	2736	3379		1908	2375.91	2129.91	2142.88	192.532	0.315019	2019.88	181.481	0.157329		E
PEG1406	fig|6666666.88372.peg.1406	peg.1406	CDS	LMR001-004	636247	633473	2775	Cytoplasmic axial filament protein CafA and Ribonuclease G (EC 3.1.4.-)	Bacterial Cell Division, RNA processing and degradation, bacterial		PEG1406	2775	58215	87261	60776		58215	52081.7	52741.7	55146	1987.24	-0.160499	55476	1999.14	-0.14233		JM	K08300
PEG1407	fig|6666666.88372.peg.1407	peg.1407	CDS	LMR001-004	637013	636870	144	hypothetical protein	- none -		PEG1407	144	495	648	778		495	534.312	288.224	514.881	357.556	0.108942	391.837	272.109	-0.781552
PEG1408	fig|6666666.88372.peg.1408	peg.1408	CDS	LMR001-004	637047	638237	1191	N-acetylmuramoyl-L-alanine amidase (EC 3.5.1.28)	Murein Hydrolases, Recycling of Peptidoglycan Amino Acids, Zinc regulated enzymes		PEG1408	1191	8072	6790	10432		8072	5840.51	8024.14	6956.43	584.083	-0.466895	8048.25	675.755	-0.00864157		M	K01448
PEG1409	fig|6666666.88372.peg.1409	peg.1409	CDS	LMR001-004	638590	641046	2457	Multimodular transpeptidase-transglycosylase (EC 2.4.1.129) (EC 3.4.-.-)	Peptidoglycan Biosynthesis		PEG1409	2457	25374	31538	35443		25374	22534.4	29577.8	23942.8	974.475	-0.16993	27464.6	1117.81	0.222457		M	K05366
PEG1410	fig|6666666.88372.peg.1410	peg.1410	CDS	LMR001-004	641246	642274	1029	Peptide chain release factor 2; programmed frameshift-containing	Programmed frameshift, Programmed frameshift, Translation termination factors bacterial		PEG1410	1029	7344	14219	10878		7344	11441.9	8419.67	9393.52	912.879	0.639466	7882.4	766.026	0.196974		J	K02836
PEG1411	fig|6666666.88372.peg.1411	peg.1411	CDS	LMR001-004	642868	642344	525	FIG00986121: hypothetical protein	- none -		PEG1411	525	1888	2144	3001		1888	1874.09	1822.82	1881.04	358.294	-0.0106583	1855.4	353.41	-0.0506834
PEG1412	fig|6666666.88372.peg.1412	peg.1412	CDS	LMR001-004	643740	642970	771	NAD kinase (EC 2.7.1.23)	NAD and NADP cofactor biosynthesis global		PEG1412	771	1838	1776	2932		1838	1533.36	1760.23	1684.95	218.541	-0.260292	1798.38	233.253	-0.0612258		G	K00858
PEG1413	fig|6666666.88372.peg.1413	peg.1413	CDS	LMR001-004	644479	644051	429	hypothetical protein	- none -		PEG1413	429	984	1100	1305		984	997.389	556.554	990.7	230.932	0.0194819	770.282	179.553	-0.822154
PEG1414	fig|6666666.88372.peg.1414	peg.1414	CDS	LMR001-004	645135	644956	180	hypothetical protein	- none -		PEG1414	174	82	89	181		82	64.1292	61.332	73.0822	42.0012	-0.355262	71.6836	41.1975	-0.419602
PEG1415	fig|6666666.88372.peg.1415	peg.1415	CDS	LMR001-004	646607	645408	1200	Membrane-fusion protein	- none -		PEG1415	1200	309	346	989		309	289.258	381.468	299.144	24.9286	-0.0953903	345.249	28.7707	0.303817		V	K02005
PEG1416	fig|6666666.88372.peg.1416	peg.1416	CDS	LMR001-004	648983	646611	2373	ABC-type antimicrobial peptide transport system, permease component	- none -		PEG1416	2350	595	932	2354		595	798.586	1333.03	697.124	29.6649	0.422953	964.347	41.036	1.16214		M	K02004
PEG1417	fig|6666666.88372.peg.1417	peg.1417	CDS	LMR001-004	649699	648980	720	ABC transporter, ATP-binding protein	- none -		PEG1417	719	116	194	890		116	151.253	330.481	133.565	18.5766	0.384362	223.179	31.0402	1.51196		V	K02003
PEG1418	fig|6666666.88372.peg.1418	peg.1418	CDS	LMR001-004	650045	649917	129	hypothetical protein	- none -		PEG1418	129	40	162	193		40	121.873	66.5143	80.9338	62.7394	1.60751	53.2544	41.2825	0.733864		O
PEG1419	fig|6666666.88372.peg.1419	peg.1419	CDS	LMR001-004	651007	650066	942	Transcriptional regulator, LysR family	CBSS-349102.4.peg.3442		PEG1419	942	1702	4625	3653		1702	3943.02	2330.06	2822.59	299.638	1.21194	2016.11	214.024	0.453001		K
PEG1420	fig|6666666.88372.peg.1420	peg.1420	CDS	LMR001-004	651141	651842	702	FMN-dependent NADH-azoreductase	- none -		PEG1420	688	1209	1763	2027		1209	1523.48	1089.34	1365.65	198.495	0.334969	1148.58	166.944	-0.148941		I	K01118
PEG1421	fig|6666666.88372.peg.1421	peg.1421	CDS	LMR001-004	652048	652323	276	FIG01075925: hypothetical protein	- none -		PEG1421	276	231	1036	448		231	924.034	167.066	577.62	209.283	1.99876	199.136	72.1508	-0.468763
PEG1422	fig|6666666.88372.peg.1422	peg.1422	CDS	LMR001-004	653206	652331	876	23S rRNA (guanosine-2'-O-) -methyltransferase rlmB (EC 2.1.1.-)	RNA methylation		PEG1422	872	1098	5195	2555		1098	4424.64	1460.31	2761.82	316.723	2.00936	1279.66	146.75	0.410077		J	K03218
PEG1423	fig|6666666.88372.peg.1423	peg.1423	CDS	LMR001-005	1	1176	1176	Translation elongation factor Tu	Mycobacterium virulence operon involved in protein synthesis (SSU ribosomal proteins), Translation elongation factors bacterial, Universal GTPases		PEG1423	1176	129852	288721	186092		129852	144168	171853	136943	11644.8	0.152369	150785	12821.9	0.405793		J	K02358
PEG1424	fig|6666666.88372.peg.1424	peg.1424	CDS	LMR001-006	128	15	114	hypothetical protein	- none -		PEG1424	114	2252	4149	3411		2252	3574.52	2151.75	2914.38	2556.47	0.665107	2202.99	1932.45	-0.067133
PEG1425	fig|6666666.88372.peg.1425	peg.1425	CDS	LMR001-006	362	1027	666	HYPOTHETICAL/UNKNOWN PROTEIN	- none -		PEG1425	666	252	751	881		252	627.211	326.747	439.489	65.9894	1.31686	289.257	43.432	0.376081
PEG1426	fig|6666666.88372.peg.1426	peg.1426	CDS	LMR001-006	1154	2041	888	UDP-glucose 4-epimerase (EC 5.1.3.2)	CBSS-296591.1.peg.2330, N-linked Glycosylation in Bacteria, Rhamnose containing glycans		PEG1426	888	7962	2996	7481		7962	2645.84	5427.39	5303.72	597.265	-1.58933	6694.49	753.884	-0.5528		MG
PEG1427	fig|6666666.88372.peg.1427	peg.1427	CDS	LMR001-006	2471	2671	201	Preprotein translocase subunit SecE (TC 3.A.5.1.1)	LSU ribosomal proteins cluster		PEG1427	201	5399	11755	7171		5399	9759.37	5182.53	7577.24	3769.77	0.855136	5288.82	2631.25	-0.0579955		U	K03073
PEG1428	fig|6666666.88372.peg.1428	peg.1428	CDS	LMR001-006	2688	3218	531	Transcription antitermination protein NusG	LSU ribosomal proteins cluster, Transcription factors bacterial		PEG1428	531	14800	25466	20356		14800	18830.2	16179.2	16810.7	3165.85	0.348324	15485.1	2916.22	0.129408		K	K02601
PEG1429	fig|6666666.88372.peg.1429	peg.1429	CDS	LMR001-006	3435	3863	429	LSU ribosomal protein L11p (L12e)	LSU ribosomal proteins cluster, Ribosome LSU bacterial		PEG1429	429	23410	75499	31721		23410	46252.3	26181.7	34820.4	8116.63	0.983735	24785	5777.4	0.162767		J	K02867
PEG1430	fig|6666666.88372.peg.1430	peg.1430	CDS	LMR001-006	3868	4566	699	LSU ribosomal protein L1p (L10Ae)	LSU ribosomal proteins cluster, Ribosome LSU bacterial		PEG1430	699	28459	80288	38986		28459	48663.9	32738.9	38554.2	5515.63	0.774696	30591.8	4376.5	0.202851		J	K02863
PEG1431	fig|6666666.88372.peg.1431	peg.1431	CDS	LMR001-006	4670	4795	126	hypothetical protein	- none -		PEG1431	126	9503	20883	9669		9503	15965.8	7352.34	12735.9	10107.9	0.748064	8429.2	6689.84	-0.370641
PEG1432	fig|6666666.88372.peg.1432	peg.1432	CDS	LMR001-006	4999	5517	519	LSU ribosomal protein L10p (P0)	LSU ribosomal proteins cluster, Ribosome LSU bacterial		PEG1432	519	67670	175265	73953		67670	92497.6	64933.6	80053	15424.5	0.452216	66271	12769	-0.0582343		J	K02864
PEG1433	fig|6666666.88372.peg.1433	peg.1433	CDS	LMR001-006	5576	5959	384	LSU ribosomal protein L7/L12 (P1/P2)	LSU ribosomal proteins cluster, Ribosome LSU bacterial		PEG1433	384	43670	121524	51919		43670	68374	44512	56012.8	14586.7	0.647413	44081.8	11479.6	0.028161		J	K02935
PEG1434	fig|6666666.88372.peg.1434	peg.1434	CDS	LMR001-006	6223	10365	4143	DNA-directed RNA polymerase beta subunit (EC 2.7.7.6)	Mycobacterium virulence operon involved in DNA transcription, RNA polymerase bacterial		PEG1434	4143	115090	244554	146819		115090	123905	134083	119492	2884.2	0.106592	124582	3007.04	0.220491		K	K03043
PEG1435	fig|6666666.88372.peg.1435	peg.1435	CDS	LMR001-006	10555	14760	4206	DNA-directed RNA polymerase beta' subunit (EC 2.7.7.6)	Mycobacterium virulence operon involved in DNA transcription, RNA polymerase bacterial		PEG1435	4206	152343	256499	168754		152343	129477	154983	140941	3350.95	-0.235222	153694	3654.17	0.0242013		K	K03046
PEG1436	fig|6666666.88372.peg.1436	peg.1436	CDS	LMR001-006	15175	14879	297	two component response regulator	- none -		PEG1436	297	3146	6379	5735		3146	5509.11	4033.27	4328.43	1457.38	0.807499	3590.51	1208.93	0.357631
PEG1437	fig|6666666.88372.peg.1437	peg.1437	CDS	LMR001-006	15790	15674	117	hypothetical protein	- none -		PEG1437	117	1694	7164	3164		1694	6121.04	1966.53	3907.69	3339.9	1.85305	1830.43	1564.47	0.214928
PEG1438	fig|6666666.88372.peg.1438	peg.1438	CDS	LMR001-006	15869	16240	372	SSU ribosomal protein S12p (S23e)	Mycobacterium virulence operon involved in protein synthesis (SSU ribosomal proteins), Ribosome SSU bacterial		PEG1438	372	13413	53044	24929		13413	34734.9	20214.5	24081.3	6473.47	1.37118	16821.1	4521.79	0.590181		J	K02950
PEG1439	fig|6666666.88372.peg.1439	peg.1439	CDS	LMR001-006	16298	16768	471	SSU ribosomal protein S7p (S5e)	Mycobacterium virulence operon involved in protein synthesis (SSU ribosomal proteins), Ribosome SSU bacterial		PEG1439	471	15135	55185	26502		15135	35854.4	21575.1	25495	5412.95	1.2442	18355.3	3897.1	0.511419		J	K02992
PEG1440	fig|6666666.88372.peg.1440	peg.1440	CDS	LMR001-006	16798	18897	2100	Translation elongation factor G	Mycobacterium virulence operon involved in protein synthesis (SSU ribosomal proteins), Translation elongation factor G family, Translation elongation factors bacterial, Universal GTPases		PEG1440	2100	72386	286129	114660		72386	143256	103093	107850	5135.72	0.98367	87768.4	4179.45	0.50902		J	K02355
PEG1441	fig|6666666.88372.peg.1441	peg.1441	CDS	LMR001-007	1571	1176	396	PUTATIVE TRANSCRIPTION REGULATOR PROTEIN	- none -		PEG1441	396	4991	3038	4635		4991	2691.9	3145.29	3840.37	969.791	-0.89008	4067.07	1027.04	-0.665511		K
PEG1442	fig|6666666.88372.peg.1442	peg.1442	CDS	LMR001-007	1832	2761	930	putative transmembrane protein	- none -		PEG1442	930	2391	2144	3231		2391	1874.09	2019.22	2133.71	229.431	-0.352817	2206.27	237.233	-0.245214		R
PEG1443	fig|6666666.88372.peg.1443	peg.1443	CDS	LMR001-007	3647	2868	780	Octanoate-[acyl-carrier-protein]-protein-N-octanoyltransferase	Lipoic acid metabolism, Lipoic acid synthesis cluster		PEG1443	779	2036	2474	3157		2036	2154.72	1960.4	2095.88	269.047	0.081022	1998.72	256.575	-0.0553289		H	K03801
PEG1444	fig|6666666.88372.peg.1444	peg.1444	CDS	LMR001-007	4456	6405	1950	Serine protein kinase (prkA protein), P-loop containing	- none -		PEG1444	1950	29633	21785	23503		29633	16542.3	18919.4	23095.3	1184.37	-0.841795	24283.9	1245.33	-0.648084		T	K07180
PEG1445	fig|6666666.88372.peg.1445	peg.1445	CDS	LMR001-007	6431	7747	1317	FIG002076: hypothetical protein	- none -		PEG1445	1317	5502	3470	4976		5502	3061.31	3412.15	4284.7	325.338	-0.847398	4460.11	338.657	-0.690869		S	K09786
PEG1446	fig|6666666.88372.peg.1446	peg.1446	CDS	LMR001-007	7760	9307	1548	FIG004684: SpoVR-like protein	- none -		PEG1446	1548	3071	2253	3510		3071	1970.55	2218.91	2519.79	162.777	-0.639182	2643.97	170.799	-0.467925		S
PEG1447	fig|6666666.88372.peg.1447	peg.1447	CDS	LMR001-007	9827	9465	363	conserved hypothetical protein	- none -		PEG1447	363	1525	2507	2112		1525	2182.75	1142.8	1853.4	510.579	0.518235	1333.43	367.336	-0.415334
PEG1448	fig|6666666.88372.peg.1448	peg.1448	CDS	LMR001-007	10175	9918	258	PUTATIVE TRANSMEMBRANE PROTEIN	- none -		PEG1448	258	2618	4080	4155		2618	3527.19	2736.04	3072.68	1190.96	0.429952	2677.11	1037.64	0.0635216
PEG1449	fig|6666666.88372.peg.1449	peg.1449	CDS	LMR001-007	10932	10444	489	Peptide deformylase (EC 3.5.1.88)	Bacterial RNA-metabolizing Zn-dependent hydrolases, Conserved gene cluster associated with Met-tRNA formyltransferase, Translation termination factors bacterial		PEG1449	488	720	1093	1196		720	992.122	482.987	855.786	175.366	0.463626	601.218	123.2	-0.574908		J	K01462
PEG1450	fig|6666666.88372.peg.1450	peg.1450	CDS	LMR001-007	11209	12630	1422	Magnesium transporter	- none -		PEG1450	1422	2353	4297	4052		2353	3678.88	2650.85	3016.97	212.164	0.643511	2502.95	176.016	0.1707		P	K06213
PEG1451	fig|6666666.88372.peg.1451	peg.1451	CDS	LMR001-007	12698	13084	387	Predicted transcriptional regulator LiuR of leucine degradation pathway, MerR family	HMG CoA Synthesis		PEG1451	387	4656	4004	5123		4656	3465.46	3527.45	4060.66	1049.27	-0.426002	4091.66	1057.28	-0.400422		K
PEG1452	fig|6666666.88372.peg.1452	peg.1452	CDS	LMR001-007	13655	13263	393	Putative protein-S-isoprenylcysteine methyltransferase	- none -		PEG1452	388	81	272	298		81	218.505	109.261	149.707	38.5843	1.43328	95.0853	24.5065	0.433397		O
PEG1453	fig|6666666.88372.peg.1453	peg.1453	CDS	LMR001-007	14757	13741	1017	FIG028593: membrane protein	- none -		PEG1453	1017	656	971	1414		656	845.612	628.494	750.879	73.8327	0.365981	642.32	63.1583	-0.0621167		S
PEG1454	fig|6666666.88372.peg.1454	peg.1454	CDS	LMR001-007	15594	14824	771	Mlr0671 protein	- none -		PEG1454	765	824	1840	1722		824	1586.77	875.929	1205.46	157.576	0.945138	850.034	111.116	0.087928		S
PEG1455	fig|6666666.88372.peg.1455	peg.1455	CDS	LMR001-007	15647	15781	135	hypothetical protein	- none -		PEG1455	135	1004	3904	1751		1004	3395.4	900.401	2200.01	1629.63	1.75694	952.508	705.562	-0.158005
PEG1456	fig|6666666.88372.peg.1456	peg.1456	CDS	LMR001-007	16079	17479	1401	L-serine dehydratase (EC 4.3.1.17)	Glycine and Serine Utilization, Pyruvate Alanine Serine Interconversions		PEG1456	1401	27919	13402	24441		27919	10885.4	19757.8	19405.4	1385.11	-1.35919	23841.6	1701.76	-0.499158		E	K01752
PEG1457	fig|6666666.88372.peg.1457	peg.1457	CDS	LMR001-007	17558	17995	438	hypothetical protein	- none -		PEG1457	438	2164	2839	3032		2164	2472.17	1853.5	2317.45	529.097	0.192934	2008.11	458.473	-0.222591		S
PEG1458	fig|6666666.88372.peg.1458	peg.1458	CDS	LMR001-007	18360	18094	267	HYPOTHETICAL/UNKNOWN PROTEIN	- none -		PEG1458	267	2758	3282	4815		2758	2918.13	3293.78	2839.36	1063.43	0.0800753	3027.18	1133.78	0.254775
PEG1459	fig|6666666.88372.peg.1459	peg.1459	CDS	LMR001-007	19967	18438	1530	D-alanyl-D-alanine carboxypeptidase (EC 3.4.16.4)	CBSS-84588.1.peg.1247, Metallocarboxypeptidases (EC 3.4.17.-), Murein Hydrolases, Peptidoglycan Biosynthesis		PEG1459	1530	28391	28123	41582		28391	20454.3	35077.5	24416.7	1595.87	-0.47243	31728.3	2073.75	0.305711		M	K01286
PEG1460	fig|6666666.88372.peg.1460	peg.1460	CDS	LMR001-007	20853	20125	729	FIG00794796: hypothetical protein	- none -		PEG1460	729	1138	1304	2279		1138	1153.69	1277.97	1145.66	157.155	0.0202318	1207.8	165.679	0.167827
PEG1461	fig|6666666.88372.peg.1461	peg.1461	CDS	LMR001-007	21762	21154	609	COGs COG3672	- none -		PEG1461	609	1804	1071	2131		1804	966.453	1156.88	1384.74	227.379	-0.899642	1479.95	243.013	-0.640173		S
PEG1462	fig|6666666.88372.peg.1462	peg.1462	CDS	LMR001-007	22889	22281	609	FIG00983977: hypothetical protein	- none -		PEG1462	609	4848	5356	6803		4848	4565.92	4881.93	4709.4	773.301	-0.0879356	4867.41	799.246	0.00860798
PEG1463	fig|6666666.88372.peg.1463	peg.1463	CDS	LMR001-007	23702	23085	618	hypothetical protein	- none -		PEG1463	605	52	125	350		52	92.1123	128.954	72.0559	11.9101	0.824893	90.4767	14.9548	1.31028		S
PEG1464	fig|6666666.88372.peg.1464	peg.1464	CDS	LMR001-007	24064	24870	807	INTEGRAL MEMBRANE PROTEIN (Rhomboid family)	- none -		PEG1464	807	1071	2143	2049		1071	1874.09	1103.64	1472.81	182.504	0.806536	1087.58	134.768	0.0426099		R
PEG1465	fig|6666666.88372.peg.1465	peg.1465	CDS	LMR001-007	27207	24979	2229	Periplasmic aromatic aldehyde oxidoreductase, molybdenum binding subunit YagR	- none -		PEG1465	2225	519	662	2266		519	545.217	1265.54	532.008	23.9105	0.0716508	892.17	40.0975	1.2865		C	K11177
PEG1466	fig|6666666.88372.peg.1466	peg.1466	CDS	LMR001-007	28181	27204	978	Periplasmic aromatic aldehyde oxidoreductase, FAD binding subunit YagS	Purine Utilization		PEG1466	978	166	189	1089		166	146.254	423.598	156.106	15.9618	-0.182346	294.779	30.141	1.35187		C	K11178
PEG1467	fig|6666666.88372.peg.1467	peg.1467	CDS	LMR001-007	28802	28185	618	Periplasmic aromatic aldehyde oxidoreductase, iron-sulfur subunit YagT	- none -		PEG1467	614	115	180	495		115	138.032	185.8	126.556	20.6117	0.262365	150.44	24.5016	0.691114		C	K13483
PEG1468	fig|6666666.88372.peg.1468	peg.1468	CDS	LMR001-007	29877	28987	891	transcriptional regulator, AraC family	- none -		PEG1468	892	488	466	1377		488	392.855	604.61	440.192	49.3488	-0.311491	546.069	61.2185	0.310517		K	K07506
PEG1469	fig|6666666.88372.peg.1469	peg.1469	CDS	LMR001-007	30442	30870	429	Inosine-5'-monophosphate dehydrogenase (EC 1.1.1.205)	Purine conversions, Purine salvage cluster		PEG1469	429	10077	4920	8001		10077	4189.18	5860.63	7129.25	1661.83	-1.26523	7964.97	1856.64	-0.780839		T
PEG1470	fig|6666666.88372.peg.1470	peg.1470	CDS	LMR001-007	31998	31033	966	UPF0028 protein YchK	Broadly distributed proteins not in subsystems		PEG1470	966	13326	8480	15895		13326	7153.51	12428.3	10244.4	1060.49	-0.898517	12881.7	1333.51	-0.101617		R	K07001
PEG1471	fig|6666666.88372.peg.1471	peg.1471	CDS	LMR001-007	32865	32413	453	Phosphoribosyl-AMP cyclohydrolase (EC 3.5.4.19)	Histidine Biosynthesis, Zinc regulated enzymes		PEG1471	453	3471	4339	4500		3471	3708.25	3029.09	3587.81	792.011	0.0968977	3248.23	717.048	-0.194958		E	K01496
PEG1472	fig|6666666.88372.peg.1472	peg.1472	CDS	LMR001-007	33610	32993	618	GTP cyclohydrolase I (EC 3.5.4.16) type 1	Folate Biosynthesis, Folate biosynthesis cluster, Molybdenum cofactor biosynthesis, Queuosine-Archaeosine Biosynthesis, Zinc regulated enzymes, tRNA modification Bacteria		PEG1472	618	23359	25408	25777		23359	18794.3	20939.3	21064.4	3408.48	-0.312175	22136.9	3582.03	-0.156259		H	K01495
PEG1473	fig|6666666.88372.peg.1473	peg.1473	CDS	LMR001-007	33952	34398	447	Putative iron-sulfur cluster assembly scaffold protein for SUF system, SufE2	Iron-sulfur cluster assembly		PEG1473	447	2320	1381	2522		2320	1208.75	1440.86	1763.07	394.423	-0.938993	1879.13	420.386	-0.685575		C
PEG1474	fig|6666666.88372.peg.1474	peg.1474	CDS	LMR001-007	34402	34788	387	Protein YidD	Cell Division Subsystem including YidCD, RNA modification cluster		PEG1474	387	778	401	903		778	346.121	337.528	562.079	145.24	-1.16856	557.782	144.13	-1.20483		S	K08998
PEG1475	fig|6666666.88372.peg.1475	peg.1475	CDS	LMR001-007	34785	35204	420	FIG01074281: hypothetical protein	- none -		PEG1475	420	376	228	708		376	182.642	269.391	279.24	66.4856	-1.04109	322.614	76.8129	-0.480409		S
PEG1476	fig|6666666.88372.peg.1476	peg.1476	CDS	LMR001-007	35396	35746	351	FIG00984507: hypothetical protein	- none -		PEG1476	351	111	158	453		111	118.441	169.083	114.679	32.6721	0.0946768	140	39.8861	0.608244		S
PEG1477	fig|6666666.88372.peg.1477	peg.1477	CDS	LMR001-007	35978	35853	126	hypothetical protein	- none -		PEG1477	126	281	973	540		281	848.257	203.277	564.723	448.193	1.59296	242.234	192.249	-0.468099
PEG1478	fig|6666666.88372.peg.1478	peg.1478	CDS	LMR001-007	35970	37949	1980	Threonyl-tRNA synthetase (EC 6.1.1.3)	tRNA aminoacylation, Thr		PEG1478	1980	8457	26155	14346		8457	19262.4	11180.8	13857.6	699.878	1.18829	9816.8	495.798	0.403526		J	K01868
PEG1479	fig|6666666.88372.peg.1479	peg.1479	CDS	LMR001-007	39085	38090	996	FIG00984601: hypothetical protein	- none -		PEG1479	996	2927	3493	5710		2927	3079.76	4012.15	3001.96	301.401	0.0747994	3468.15	348.208	0.456358
PEG1480	fig|6666666.88372.peg.1480	peg.1480	CDS	LMR001-007	39186	39770	585	Nitroreductase family protein	- none -		PEG1480	585	2544	2569	3456		2544	2236.11	2184.9	2391.47	408.798	-0.187713	2365.87	404.422	-0.221134		C
PEG1481	fig|6666666.88372.peg.1481	peg.1481	CDS	LMR001-007	39770	40372	603	Nitrilotriacetate monooxygenase component B (EC 1.14.13.-)	Aromatic Amin Catabolism		PEG1481	603	1717	1974	2529		1717	1701.25	1444.68	1709.58	283.512	-0.0140571	1581.29	262.238	-0.249904		R
PEG1482	fig|6666666.88372.peg.1482	peg.1482	CDS	LMR001-007	41085	40369	717	FIG01075119: hypothetical protein	- none -		PEG1482	717	549	854	1262		549	713.068	526.687	631.304	88.048	0.375812	538.114	75.0507	-0.0612822		G
PEG1483	fig|6666666.88372.peg.1483	peg.1483	CDS	LMR001-007	41158	42291	1134	FIG00985737: hypothetical protein	- none -		PEG1483	1134	3591	1731	4107		3591	1497.95	2696.39	2543.59	224.302	-1.26068	3142.81	277.143	-0.412639		S
PEG1484	fig|6666666.88372.peg.1484	peg.1484	CDS	LMR001-007	42731	42297	435	FIG00985335: hypothetical protein	- none -		PEG1484	435	8368	4421	8862		8368	3779.15	6652.68	6077.22	1397.06	-1.14808	7513.98	1727.35	-0.332205
PEG1485	fig|6666666.88372.peg.1485	peg.1485	CDS	LMR001-007	42958	43431	474	IAA acetyltransferase (EC 2.3.1.-)	- none -		PEG1485	474	2095	1271	3061		2095	1132.56	1878.86	1613.34	340.367	-0.886745	1986.48	419.089	-0.156485		E	K03829
PEG1486	fig|6666666.88372.peg.1486	peg.1486	CDS	LMR001-007	45687	43624	2064	Topoisomerase IV subunit B (EC 5.99.1.-)	DNA topoisomerases, Type II, ATP-dependent, Resistance to fluoroquinolones		PEG1486	2053	16395	26059	20226		16395	19188.9	16060.3	17797.4	866.896	0.226055	16233.1	790.7	-0.0307198		L	K02622
PEG1487	fig|6666666.88372.peg.1487	peg.1487	CDS	LMR001-007	46047	46925	879	Phospholipase/carboxylesterase family protein	- none -		PEG1487	877	1221	1801	2375		1221	1556.62	1347.86	1389.21	158.405	0.349407	1284.83	146.503	0.141667		E
PEG1488	fig|6666666.88372.peg.1488	peg.1488	CDS	LMR001-007	46945	48264	1320	Oxidoreductase, FAD-binding	- none -		PEG1488	1317	1199	1646	2568		1199	1428.04	1472.46	1313.77	99.7549	0.251609	1335.98	101.441	0.295799		C
PEG1489	fig|6666666.88372.peg.1489	peg.1489	CDS	LMR001-007	48926	48327	600	YceI	- none -		PEG1489	600	158	238	649		158	191.648	248.146	174.886	29.1477	0.277394	203.135	33.8559	0.650125		S
PEG1490	fig|6666666.88372.peg.1490	peg.1490	CDS	LMR001-007	49549	48929	621	cytochrome B561	- none -		PEG1490	619	387	380	843		387	326.024	310.862	356.641	57.6156	-0.248317	349.06	56.391	-0.317018		C	K12262
PEG1491	fig|6666666.88372.peg.1491	peg.1491	CDS	LMR001-007	49790	50560	771	Triosephosphate isomerase (EC 5.3.1.1)	CBSS-331978.3.peg.2915, Calvin-Benson cycle, Glycolysis and Gluconeogenesis		PEG1491	771	4781	7588	7109		4781	6442.9	5129.73	5614.6	728.223	0.4288	4958.02	643.063	0.0999728		G	K01803
PEG1492	fig|6666666.88372.peg.1492	peg.1492	CDS	LMR001-007	50690	51169	480	Preprotein translocase subunit SecG (TC 3.A.5.1.1)	CBSS-331978.3.peg.2915		PEG1492	480	2388	4821	4742		2388	4106.04	3233.05	3246.93	676.443	0.78206	2810.43	585.507	0.437208		U	K03075
PEG1493	fig|6666666.88372.peg.1493	peg.1493	CDS	LMR001-007	51309	52946	1638	CTP synthase (EC 6.3.4.2)	CTP synthase (EC 6.3.4.2) cluster, Ribosome post-transcriptional modification and chromosomal segregation cluster, pyrimidine conversions		PEG1493	1638	8744	20401	13625		8744	15651.7	10590.7	12200.8	744.859	0.838996	9670.27	590.371	0.275471		F	K01937
PEG1494	fig|6666666.88372.peg.1494	peg.1494	CDS	LMR001-007	53102	53992	891	Lactoylglutathione lyase and related lyases	- none -		PEG1494	891	2772	5958	4552		2772	5131.8	3073.28	3952.56	443.61	0.887852	2923.3	328.092	0.148165
PEG1495	fig|6666666.88372.peg.1495	peg.1495	CDS	LMR001-007	53995	54834	840	2-Keto-3-deoxy-D-manno-octulosonate-8-phosphate synthase (EC 2.5.1.55)	A Gammaproteobacteria Cluster Relating to Translation		PEG1495	840	3059	5046	4484		3059	4294.11	3020.15	3678.03	437.861	0.487901	3041.06	362.031	-0.0198364		M	K01627
PEG1496	fig|6666666.88372.peg.1496	peg.1496	CDS	LMR001-007	54975	56249	1275	Enolase (EC 4.2.1.11)	Entner-Doudoroff Pathway, Glycolysis and Gluconeogenesis, Serine-glyoxylate cycle		PEG1496	1275	17156	31132	24743		17156	22276.9	20010.4	19708.3	1545.75	0.378219	18575	1456.86	0.223422		G	K01689
PEG1497	fig|6666666.88372.peg.1497	peg.1497	CDS	LMR001-007	56576	56854	279	Cell division protein DivIC (FtsB), stabilizes FtsL against RasP cleavage	Bacterial Cell Division, Bacterial Cytoskeleton, Cell division-ribosomal stress proteins cluster, Stationary phase repair cluster		PEG1497	279	3763	4156	4101		3763	3581.21	2688.54	3674.12	1316.89	-0.0729851	3227.79	1156.91	-0.486609		D
PEG1498	fig|6666666.88372.peg.1498	peg.1498	CDS	LMR001-007	56992	58038	1047	Pyruvate dehydrogenase E1 component alpha subunit (EC 1.2.4.1)	Dehydrogenase complexes, Pyruvate metabolism II: acetyl-CoA, acetogenesis from pyruvate		PEG1498	1047	43672	47366	43269		43672	31617.2	36581.3	37634.4	3594.5	-0.465326	40116.5	3831.56	-0.254926		C	K00161
PEG1499	fig|6666666.88372.peg.1499	peg.1499	CDS	LMR001-007	58056	59432	1377	Pyruvate dehydrogenase E1 component beta subunit (EC 1.2.4.1)	Dehydrogenase complexes, Pyruvate metabolism II: acetyl-CoA, acetogenesis from pyruvate		PEG1499	1377	56368	56684	51126		56368	36598.7	43855.4	46481.2	3375.54	-0.622976	50109.6	3639.04	-0.362014		C	K00162
PEG1500	fig|6666666.88372.peg.1500	peg.1500	CDS	LMR001-007	59748	61076	1329	Dihydrolipoamide acetyltransferase component of pyruvate dehydrogenase complex (EC 2.3.1.12)	5-FCL-like protein, Dehydrogenase complexes, Pyruvate metabolism II: acetyl-CoA, acetogenesis from pyruvate		PEG1500	1329	39528	36810	37109		39528	25628	31006.4	32582.3	2451.64	-0.62547	35271.5	2653.99	-0.350626		C	K00627
PEG1501	fig|6666666.88372.peg.1501	peg.1501	CDS	LMR001-007	61091	61582	492	hypothetical protein	- none -		PEG1501	492	8346	7308	7402		8346	6234.84	5358.09	7285.82	1480.86	-0.419144	6847.45	1391.76	-0.637776
PEG1502	fig|6666666.88372.peg.1502	peg.1502	CDS	LMR001-007	61583	62224	642	Arylesterase	- none -		PEG1502	642	5957	5324	6367		5957	4532.27	4518.96	5244.45	816.892	-0.39426	5237.79	815.855	-0.398504		E
PEG1503	fig|6666666.88372.peg.1503	peg.1503	CDS	LMR001-007	62227	62808	582	FIG00984483: hypothetical protein	- none -		PEG1503	582	2427	2186	2920		2427	1914.92	1748.2	2170.76	372.984	-0.341658	2087.4	358.66	-0.473075		R
PEG1504	fig|6666666.88372.peg.1504	peg.1504	CDS	LMR001-007	62827	64272	1446	Dihydrolipoamide dehydrogenase of pyruvate dehydrogenase complex (EC 1.8.1.4)	Pyruvate metabolism II: acetyl-CoA, acetogenesis from pyruvate, TCA Cycle		PEG1504	1446	25646	19855	22559		25646	15285.1	18069.8	20465	1415.28	-0.746539	21857.3	1511.57	-0.505087		C	K00382
PEG1505	fig|6666666.88372.peg.1505	peg.1505	CDS	LMR001-007	64348	64599	252	FIG01075761: hypothetical protein	- none -		PEG1505	252	1813	1443	1833		1813	1252.52	965.337	1531.93	607.909	-0.532222	1388.34	550.928	-0.907953		S
PEG1506	fig|6666666.88372.peg.1506	peg.1506	CDS	LMR001-007	64734	65702	969	Lipoate synthase	Lipoic acid metabolism, Lipoic acid synthesis cluster		PEG1506	969	9160	10317	11319		9160	8714.34	8779.6	8938.27	922.422	-0.0723041	8970.9	925.79	-0.0615388		H	K03644
PEG1507	fig|6666666.88372.peg.1507	peg.1507	CDS	LMR001-007	66251	65916	336	hypothetical protein	- none -		PEG1507	335	691	1171	1126		691	1069.98	443.743	880.109	262.719	0.632411	566.991	169.251	-0.637373
PEG1508	fig|6666666.88372.peg.1508	peg.1508	CDS	LMR001-007	66261	66599	339	Methyltransferase	- none -		PEG1508	339	510	749	909		510	624.222	340.686	567.363	167.364	0.290133	425.595	125.544	-0.583484
PEG1509	fig|6666666.88372.peg.1509	peg.1509	CDS	LMR001-007	66744	67199	456	Putative oligoketide cyclase/lipid transport protein, similarity with yeast ubiquinone-binding protein YOL008W	- none -		PEG1509	456	1169	2627	2101		1169	2280.77	1132.65	1725.13	378.319	0.963629	1151.07	252.428	-0.0461954		I	K18588
PEG1510	fig|6666666.88372.peg.1510	peg.1510	CDS	LMR001-007	67684	67181	504	C-terminal domain of CinA type S	NAD and NADP cofactor biosynthesis global, NAD and NADP cofactor biosynthesis global, Riboflavin, FMN and FAD metabolism in plants, Riboflavin synthesis cluster		PEG1510	500	593	981	918		593	858.89	345.08	725.907	145.181	0.534622	469.003	93.8005	-0.78092		R	K03743
PEG1511	fig|6666666.88372.peg.1511	peg.1511	CDS	LMR001-007	68970	67684	1287	2-C-methyl-D-erythritol 4-phosphate cytidylyltransferase (EC 2.7.7.60) / 2-C-methyl-D-erythritol 2,4-cyclodiphosphate synthase (EC 4.6.1.12)	Isoprenoid Biosynthesis, Isoprenoid Biosynthesis, Nonmevalonate Branch of Isoprenoid Biosynthesis, Nonmevalonate Branch of Isoprenoid Biosynthesis, Stationary phase repair cluster, Stationary phase repair cluster		PEG1511	1284	2275	3532	3612		2275	3110.17	2297.62	2692.63	209.707	0.451065	2286.36	178.066	0.014215		I	K12506
PEG1512	fig|6666666.88372.peg.1512	peg.1512	CDS	LMR001-007	69125	70153	1029	tRNA dihydrouridine synthase B (EC 1.-.-.-)	tRNA modification Bacteria		PEG1512	1026	1504	3335	2441		1504	2959.81	1389.83	2231.48	217.493	0.977523	1446.49	140.983	-0.113073		J	K05540
PEG1513	fig|6666666.88372.peg.1513	peg.1513	CDS	LMR001-007	70150	71298	1149	Nitrogen regulation protein NtrB (EC 2.7.13.3)	- none -		PEG1513	1149	1437	2805	2680		1437	2439.76	1552.36	1937.63	168.636	0.765198	1493.93	130.02	0.112923		T	K07708
PEG1514	fig|6666666.88372.peg.1514	peg.1514	CDS	LMR001-007	71295	72749	1455	Nitrogen regulation protein NR(I)	Ammonia assimilation		PEG1514	1455	3079	6053	4914		3079	5220.29	3362.09	4148.2	285.099	0.76303	3219.09	221.243	0.128255		T	K07712
PEG1515	fig|6666666.88372.peg.1515	peg.1515	CDS	LMR001-007	72948	75221	2274	Nitrogen regulation protein NtrY (EC 2.7.3.-)	- none -		PEG1515	2274	8934	15875	13569		8934	12583.1	10565.6	10758.1	473.092	0.494268	9749.34	428.731	0.242153		T	K13598
PEG1516	fig|6666666.88372.peg.1516	peg.1516	CDS	LMR001-007	75211	76575	1365	Nitrogen regulation protein NR(I)	Ammonia assimilation		PEG1516	1365	9548	14713	12588		9548	11780	9777.34	10664.9	781.314	0.302773	9663.63	707.958	0.033952		T	K13599
PEG1517	fig|6666666.88372.peg.1517	peg.1517	CDS	LMR001-007	76685	78031	1347	Trk system potassium uptake protein TrkA	Bacterial RNA-metabolizing Zn-dependent hydrolases, Conserved gene cluster associated with Met-tRNA formyltransferase, Hyperosmotic potassium uptake, Potassium homeostasis, Potassium homeostasis		PEG1517	1347	3674	5483	5378		3674	4679.65	3737.92	4176.24	310.04	0.349512	3705.37	275.083	0.0253481		P	K03499
PEG1518	fig|6666666.88372.peg.1518	peg.1518	CDS	LMR001-007	78039	78902	864	D-alanine aminotransferase (EC 2.6.1.21)	Pyruvate Alanine Serine Interconversions		PEG1518	864	3071	4351	4113		3071	3723.28	2696.39	3396.15	393.073	0.278795	2882.71	333.647	-0.186748		EH	K00824
PEG1519	fig|6666666.88372.peg.1519	peg.1519	CDS	LMR001-007	79033	79254	222	RNA-binding protein Hfq	Hfl operon		PEG1519	222	9987	13777	14468		9987	11138.7	11259.6	10557.8	4755.78	0.158897	10618.3	4783.03	0.174483		R	K03666
PEG1520	fig|6666666.88372.peg.1520	peg.1520	CDS	LMR001-007	79261	80658	1398	GTP-binding protein HflX	Hfl operon, Universal GTPases		PEG1520	1398	10754	19370	13802		10754	14959.8	10740.7	12862.2	920.044	0.474788	10752.7	769.149	-0.0032072		R	K03665
PEG1521	fig|6666666.88372.peg.1521	peg.1521	CDS	LMR001-007	81513	80680	834	Nucleoside triphosphate pyrophosphohydrolase MazG (EC 3.6.1.8)	Nucleoside triphosphate pyrophosphohydrolase MazG		PEG1521	834	2916	3897	4248		2916	3388.48	2810.39	3152.95	378.052	0.215943	2863.91	343.395	-0.0539242		R	K04765
PEG1522	fig|6666666.88372.peg.1522	peg.1522	CDS	LMR001-007	82104	81517	588	Deoxycytidylate deaminase (EC 3.5.4.12)	- none -		PEG1522	588	2057	2584	3155		2057	2246.77	1960.4	2151.33	365.872	0.128087	2008.14	341.521	-0.0686166		FJ
PEG1523	fig|6666666.88372.peg.1523	peg.1523	CDS	LMR001-007	82329	83774	1446	Siroheme synthase / Precorrin-2 oxidase (EC 1.3.1.76) / Sirohydrochlorin ferrochelatase (EC 4.99.1.4) / Uroporphyrinogen-III methyltransferase (EC 2.1.1.107)	Coenzyme B12 biosynthesis, Heme and Siroheme Biosynthesis, Heme and Siroheme Biosynthesis, Heme and Siroheme Biosynthesis		PEG1523	1446	4112	10179	6941		4112	8601.09	4986.15	6356.29	439.578	1.06486	4548.82	314.58	0.278262		H	K02302
PEG1524	fig|6666666.88372.peg.1524	peg.1524	CDS	LMR001-007	83785	84102	318	Conserved hypothetical protein probably involved in sulfate reduction	Inorganic Sulfur Assimilation		PEG1524	317	679	2174	1347		679	1900.04	582.978	1289.62	406.82	1.48411	631.091	199.082	-0.220402
PEG1525	fig|6666666.88372.peg.1525	peg.1525	CDS	LMR001-007	84117	85790	1674	Sulfite reductase [NADPH] hemoprotein beta-component (EC 1.8.1.2)	Cysteine Biosynthesis, Inorganic Sulfur Assimilation		PEG1525	1672	3833	12342	6829		3833	10152.1	4894.94	6994.58	418.336	1.4037	4366	261.125	0.351284		P	K00381
PEG1526	fig|6666666.88372.peg.1526	peg.1526	CDS	LMR001-007	85809	86309	501	Oxidoreductase probably involved in sulfite reduction	Inorganic Sulfur Assimilation		PEG1526	501	1056	3142	1853		1056	2795.86	980.195	1926.34	384.499	1.40357	1018.51	203.295	-0.108586		S
PEG1527	fig|6666666.88372.peg.1527	peg.1527	CDS	LMR001-007	86455	87267	813	Ferredoxin--NADP(+) reductase (EC 1.18.1.2)	Biogenesis of cytochrome c oxidases, Inorganic Sulfur Assimilation		PEG1527	813	7963	12856	13294		7963	10514.8	10344.1	9238.2	1136.31	0.401293	9152.87	1125.81	0.377684		C	K00528
PEG1528	fig|6666666.88372.peg.1528	peg.1528	CDS	LMR001-007	88012	87395	618	Transcriptional regulator, GntR family	- none -		PEG1528	618	717	816	1213		717	682.22	493.625	700.007	113.27	-0.0733339	605.71	98.0113	-0.540155		K
PEG1529	fig|6666666.88372.peg.1529	peg.1529	CDS	LMR001-007	88974	88198	777	ABC-type polar amino acid transport system, ATPase component	- none -		PEG1529	777	30549	44299	31490		30549	29908.8	25986.6	30229	3890.48	-0.0305643	28267.9	3638.08	-0.233366		E	K09972
PEG1530	fig|6666666.88372.peg.1530	peg.1530	CDS	LMR001-007	90145	88991	1155	Glutamate Aspartate transport system permease protein GltK (TC 3.A.1.3.4)	- none -		PEG1530	1155	19180	27290	21208		19180	19942	16876.6	19564.4	1693.88	0.0557057	18031.6	1561.18	-0.185083		E	K09971
PEG1531	fig|6666666.88372.peg.1531	peg.1531	CDS	LMR001-007	91343	90150	1194	Glutamate Aspartate transport system permease protein GltJ (TC 3.A.1.3.4)	- none -		PEG1531	1194	34611	42966	32475		34611	29167.1	26909.6	31880.5	2670.06	-0.246177	30751.8	2575.52	-0.362399		E	K09970
PEG1532	fig|6666666.88372.peg.1532	peg.1532	CDS	LMR001-007	92457	91432	1026	Glutamate Aspartate periplasmic binding protein precursor GltI (TC 3.A.1.3.4)	- none -		PEG1532	1026	162544	194875	147266		162544	101316	134408	131935	12859.2	-0.682066	148482	14471.9	-0.274304		ET	K09969
PEG1533	fig|6666666.88372.peg.1533	peg.1533	CDS	LMR001-007	92476	92616	141	hypothetical protein	- none -		PEG1533	141	97	465	195		97	391.937	67.2632	244.494	173.4	2.01381	82.1571	58.2674	-0.528926
PEG1534	fig|6666666.88372.peg.1534	peg.1534	CDS	LMR001-007	92792	93979	1188	Cystathionine beta-lyase (EC 4.4.1.8)	L-Cystine Uptake and Metabolism, Methionine Biosynthesis		PEG1534	1188	13244	8962	14141		13244	7565.21	10997.6	10404.3	875.784	-0.807823	12120.5	1020.25	-0.268081		E	K01760
PEG1535	fig|6666666.88372.peg.1535	peg.1535	CDS	LMR001-007	95202	94030	1173	Salicylate hydroxylase (EC 1.14.13.1)	Salicylate and gentisate catabolism, Salicylate ester degradation		PEG1535	1173	4057	5358	5666		4057	4565.92	3970	4310.51	367.477	0.171175	4012.54	342.075	-0.0305917		HC	K00480
PEG1536	fig|6666666.88372.peg.1536	peg.1536	CDS	LMR001-007	95475	95230	246	FIG00450516: Zinc-finger domain protein	- none -		PEG1536	246	3565	5471	5588		3565	4668.98	3906.44	4116.74	1673.47	0.389402	3735.47	1518.49	0.132149		S
PEG1537	fig|6666666.88372.peg.1537	peg.1537	CDS	LMR001-007	95655	96434	780	Hydrolase	- none -		PEG1537	780	3651	7914	5612		3651	6691.54	3927.66	5169.54	662.761	0.875414	3787.6	485.59	0.106747		R
PEG1538	fig|6666666.88372.peg.1538	peg.1538	CDS	LMR001-007	96650	97477	828	Serine acetyltransferase (EC 2.3.1.30)	Cysteine Biosynthesis, Methionine Biosynthesis		PEG1538	828	10712	14850	13058		10712	11872.9	10151	11294	1364.01	0.148014	10433.1	1260.04	-0.0780334		E	K00640
PEG1539	fig|6666666.88372.peg.1539	peg.1539	CDS	LMR001-007	97667	97870	204	FIG00451007: hypothetical protein	- none -		PEG1539	204	5679	12534	9266		5679	10291.7	7007.42	7983.58	3913.52	0.858677	6341.43	3108.55	0.30415
PEG1540	fig|6666666.88372.peg.1540	peg.1540	CDS	LMR001-007	98081	98434	354	FIG00440041: hypothetical protein	- none -		PEG1540	354	31846	58801	98709		31846	37709.3	88021.7	34775.6	9823.63	0.243991	59931.8	16929.9	1.46693		S
[truncated: 4,989 more rows]
